# Supplementary material
Source: PubMed Central journal article supplement (PMC3436940)

Studies on the Selectivity Between Nickel-Catalyzed  
1,2-*Cis*-2-Amino Glycosylation of Hydroxyl Groups of  
Thioglycoside Acceptors with C(2)-Substituted  
Benzylidene *N*-Phenyl Trifluoroacetimidates and  
Intermolecular Aglycon Transfer of the Sulfide Group

*Fei Yu and Hien M. Nguyen\**

Department of Chemistry, University of Iowa, Iowa City, IA 52242

**SPECTRAL DATA**

|                                                                                                      |                       |
|------------------------------------------------------------------------------------------------------|-----------------------|
| <b><i>N</i>-Phenyl Trifluoroacetimidates</b>                                                         | <b>Page 2 – 34</b>    |
| <b>C(2)-<i>N</i>-Substituted Benzylideneamino Disaccharides and Aglycon Transfer Thioglycosides</b>  | <b>Page 35 – 103</b>  |
| <b>C(2)-<i>N</i>-Substituted Benzylideneamino Trisaccharides and Aglycon Transfer Thioglycosides</b> | <b>Page 104 – 109</b> |
| <b>C(2)-<i>N</i>-Acetyl Trisaccharides</b>                                                           | <b>Page 110 – 111</b> |
| <b>C(2)-Azido Disaccharides and Aglycon Transfer Thioglycosides</b>                                  | <b>Page 112 – 117</b> |

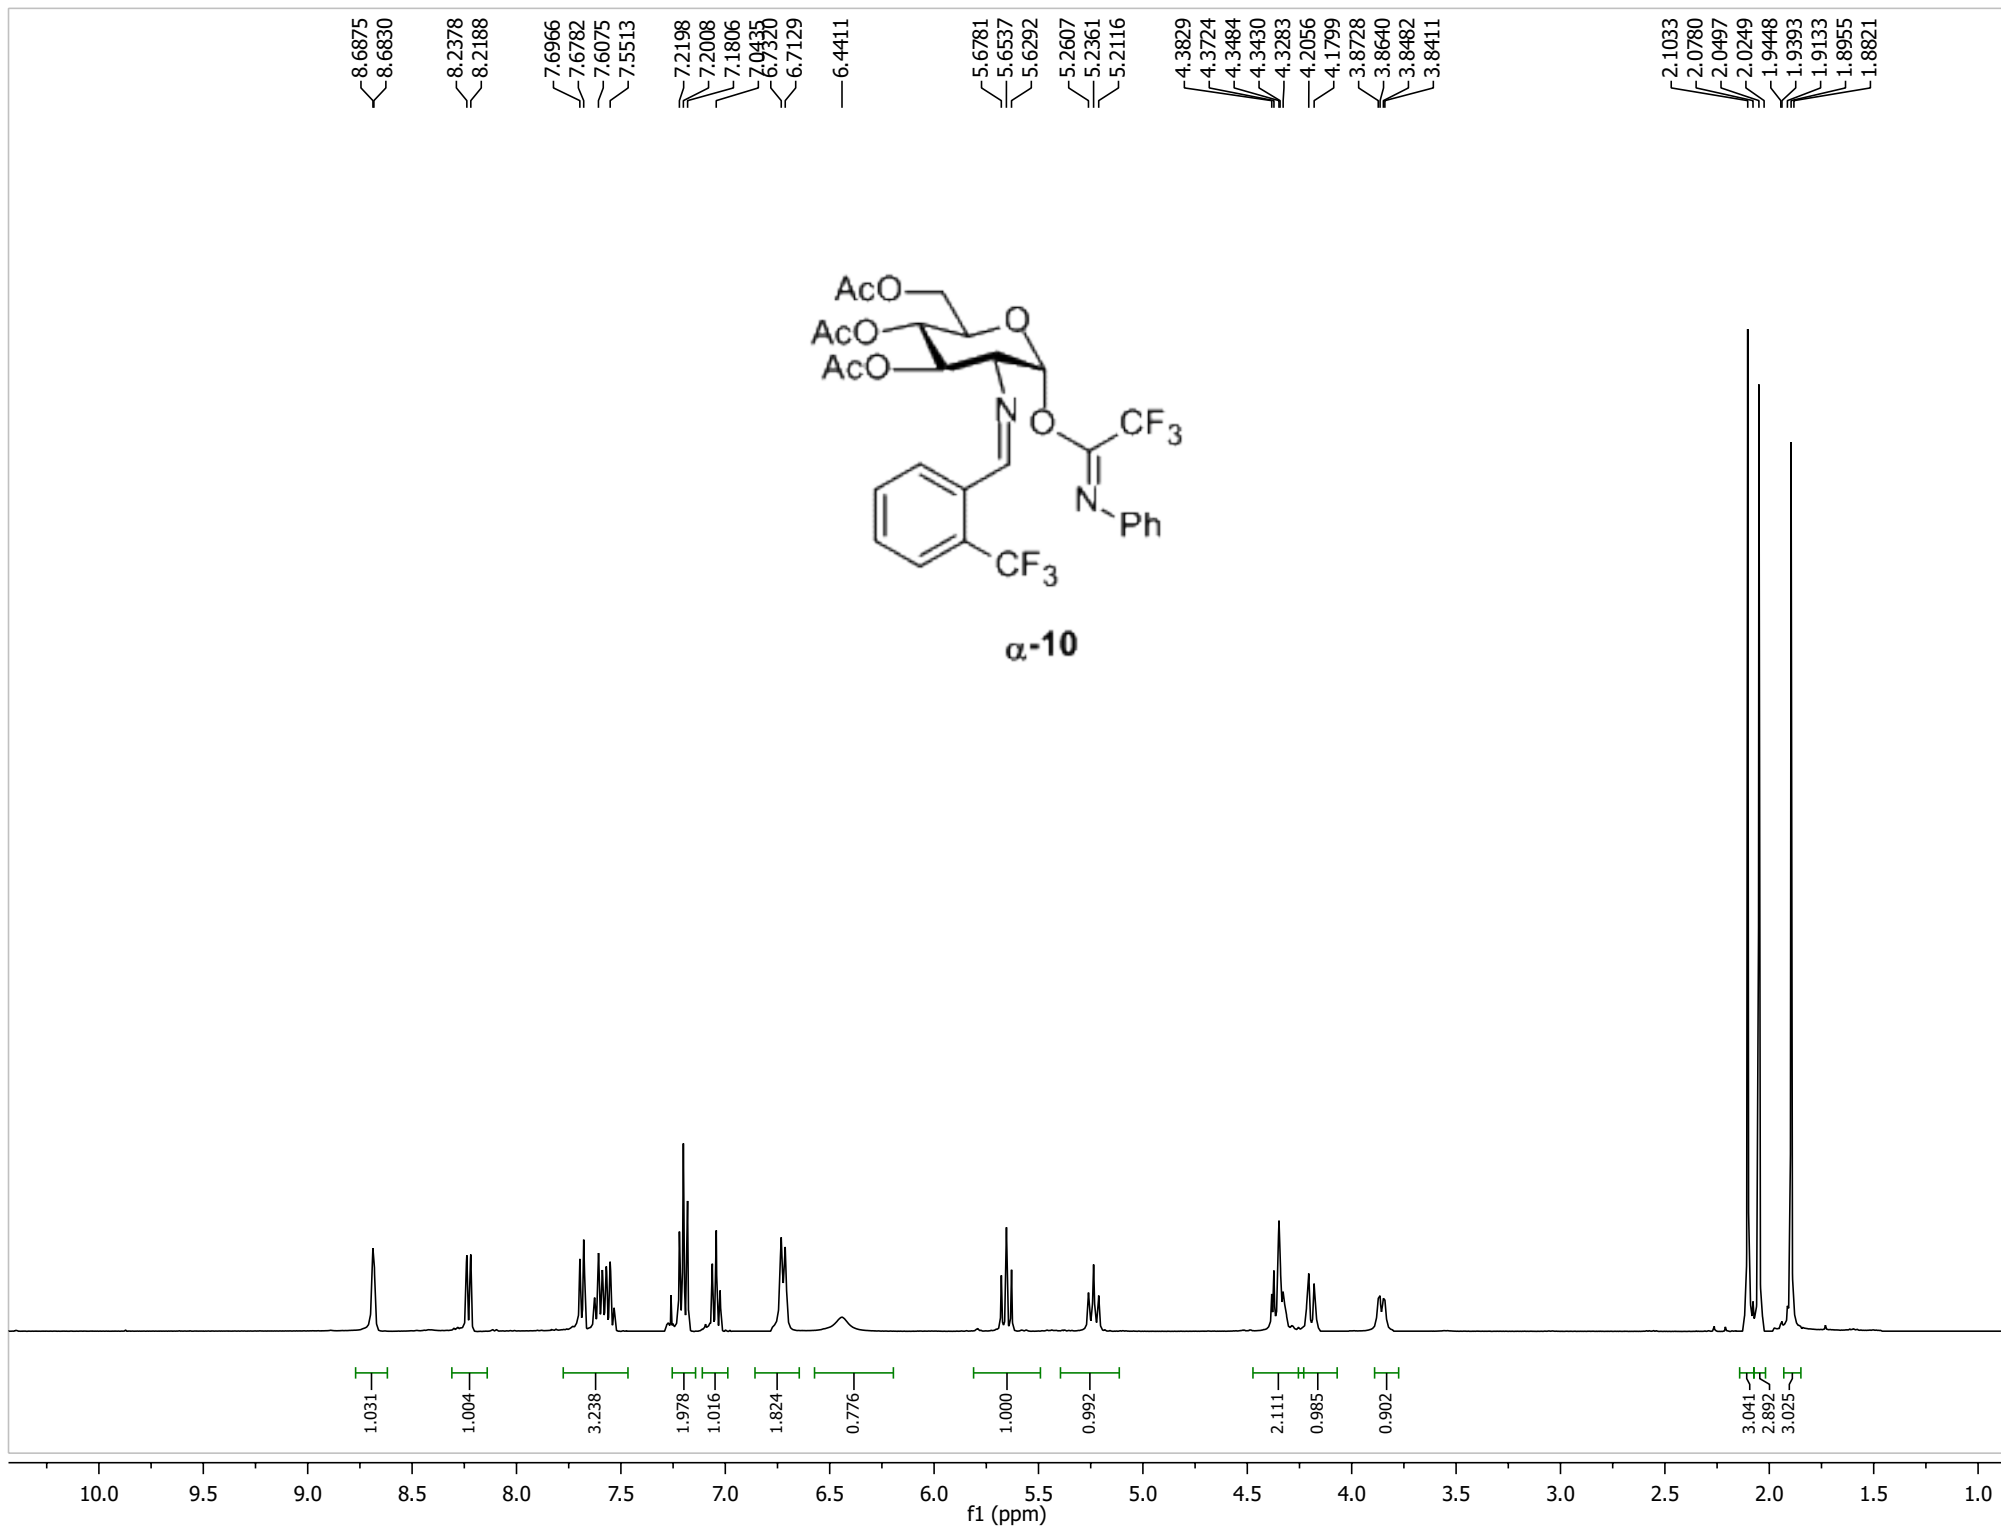

170.4062  
169.6789  
169.5147

161.4835

143.2114  
133.1324  
132.1230  
130.9842  
129.8418  
129.5364  
129.2281  
129.0293  
128.6447  
128.5913  
125.6463  
125.5902  
125.5346  
125.4788  
125.3832  
124.3438  
122.6610  
119.3863

94.6642

77.3186  
77.0005  
76.6822  
71.1100  
70.5120  
68.0313  
61.7177

20.5467  
20.4988  
20.2068

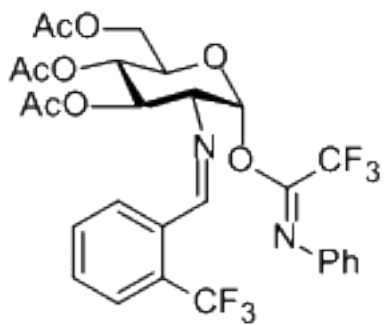

$\alpha$ -10

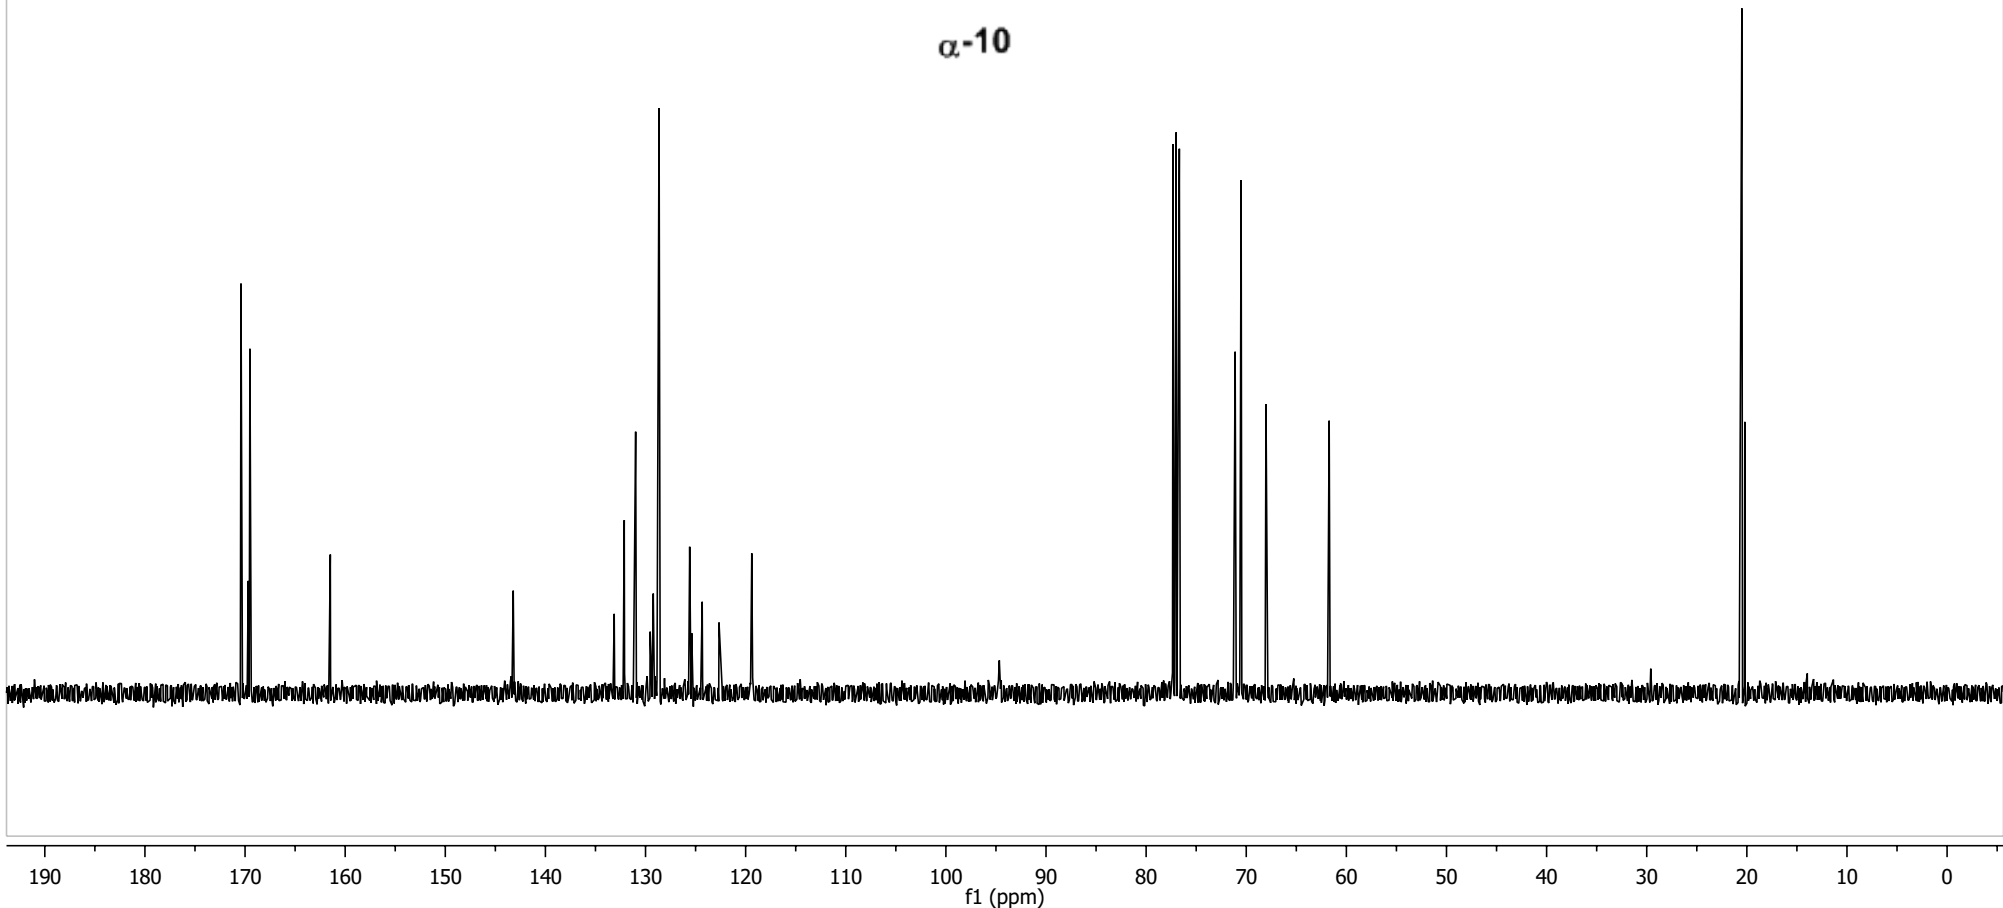

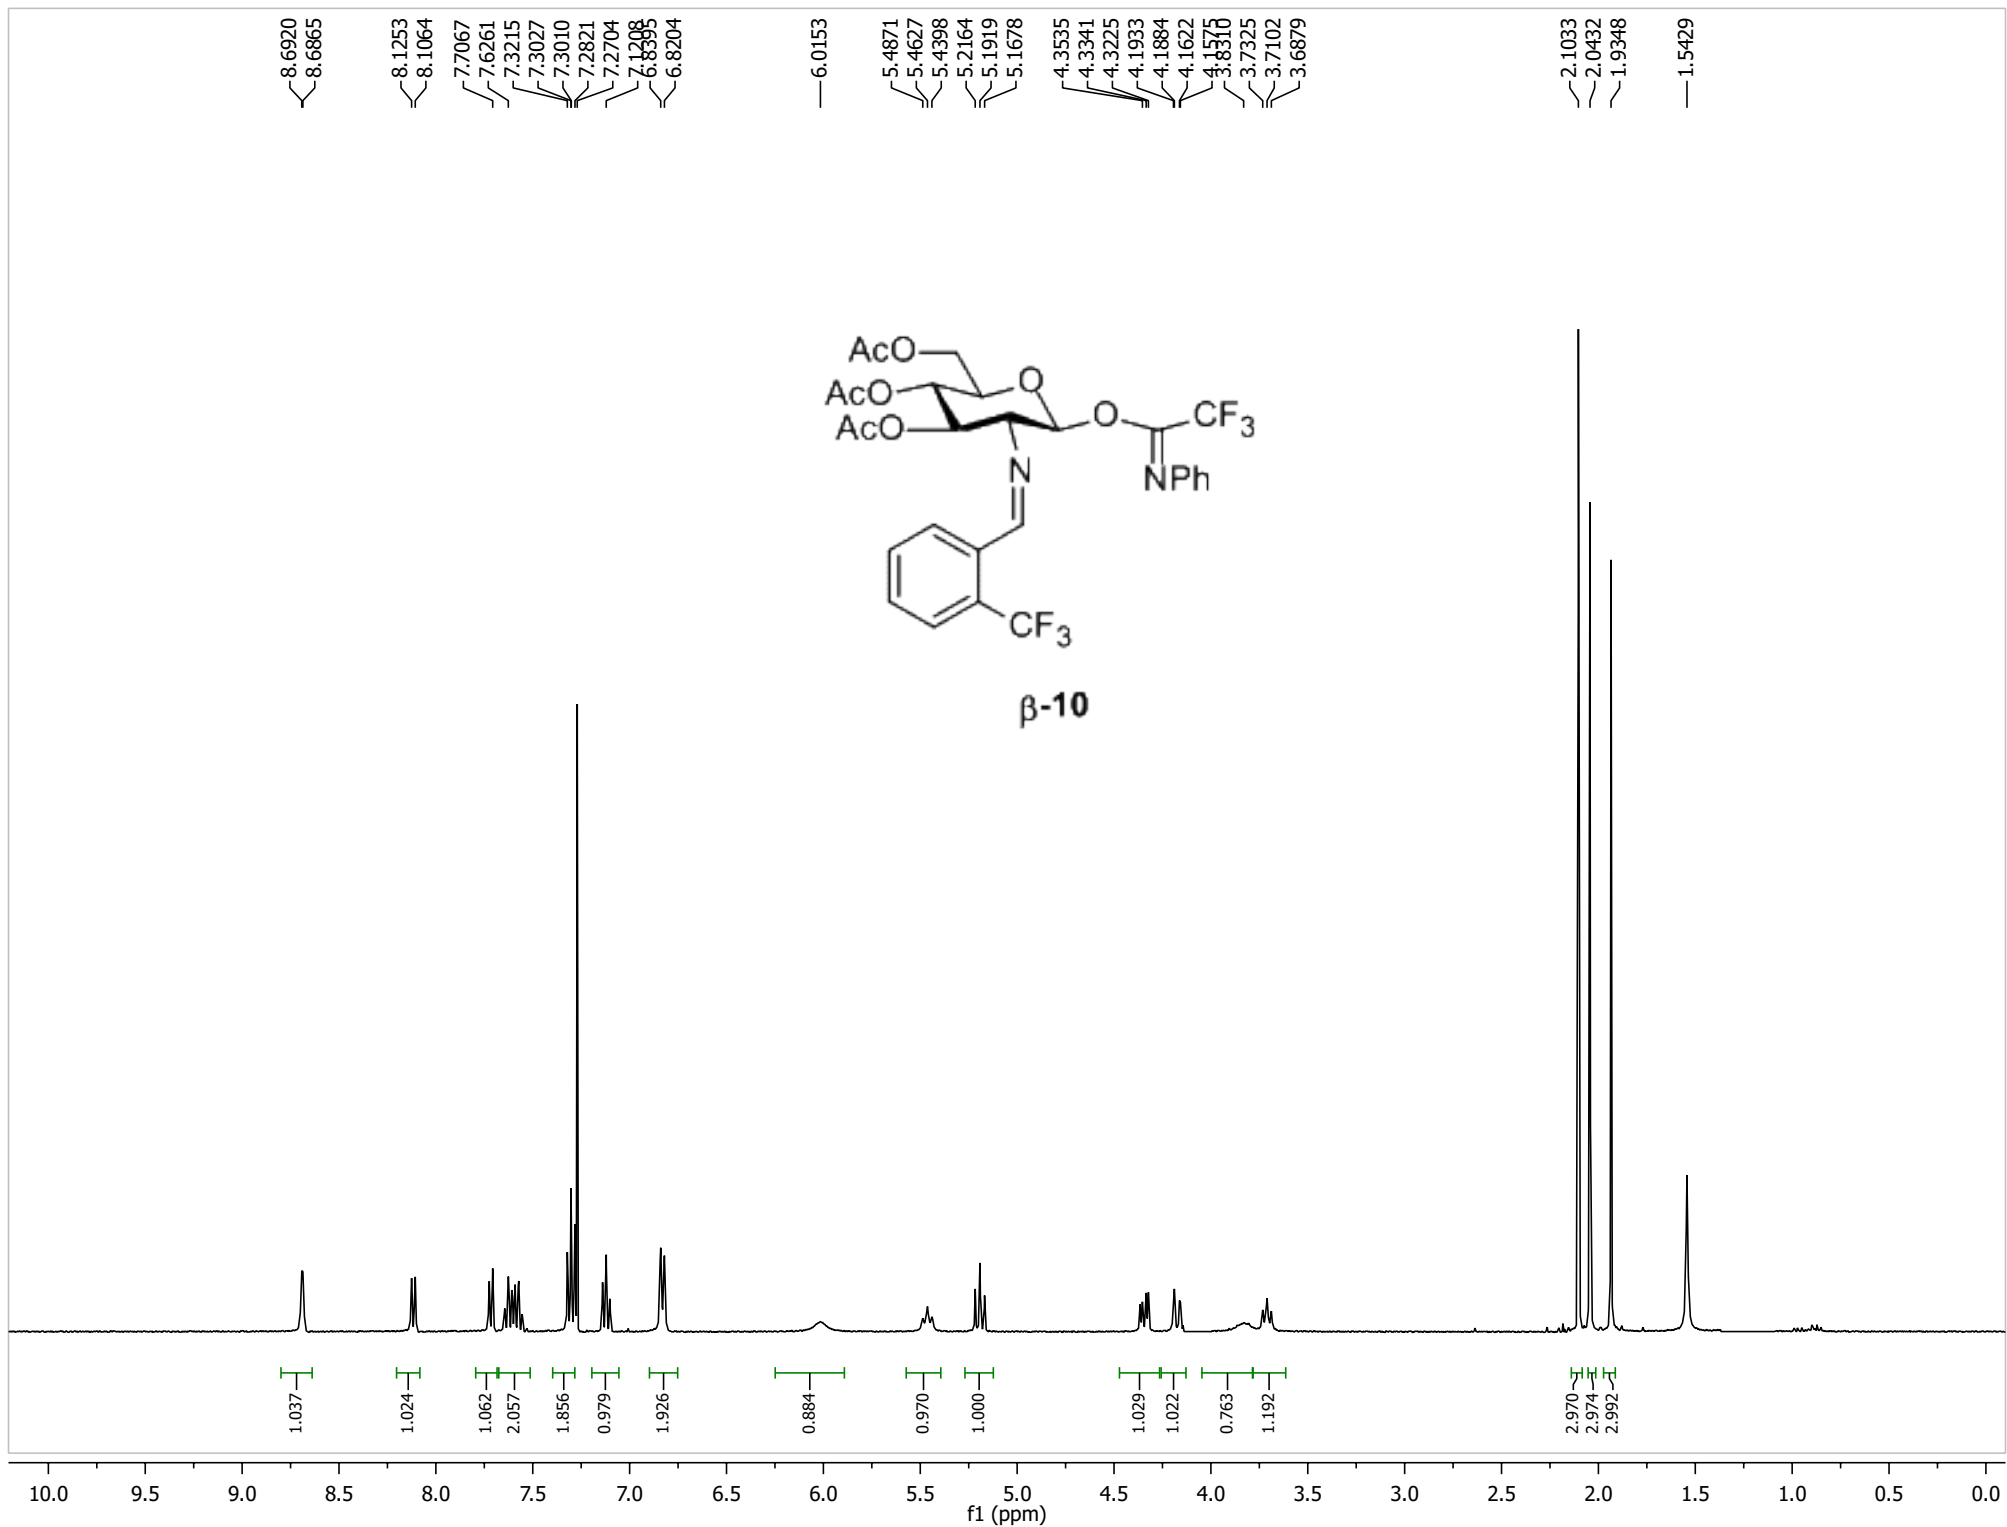

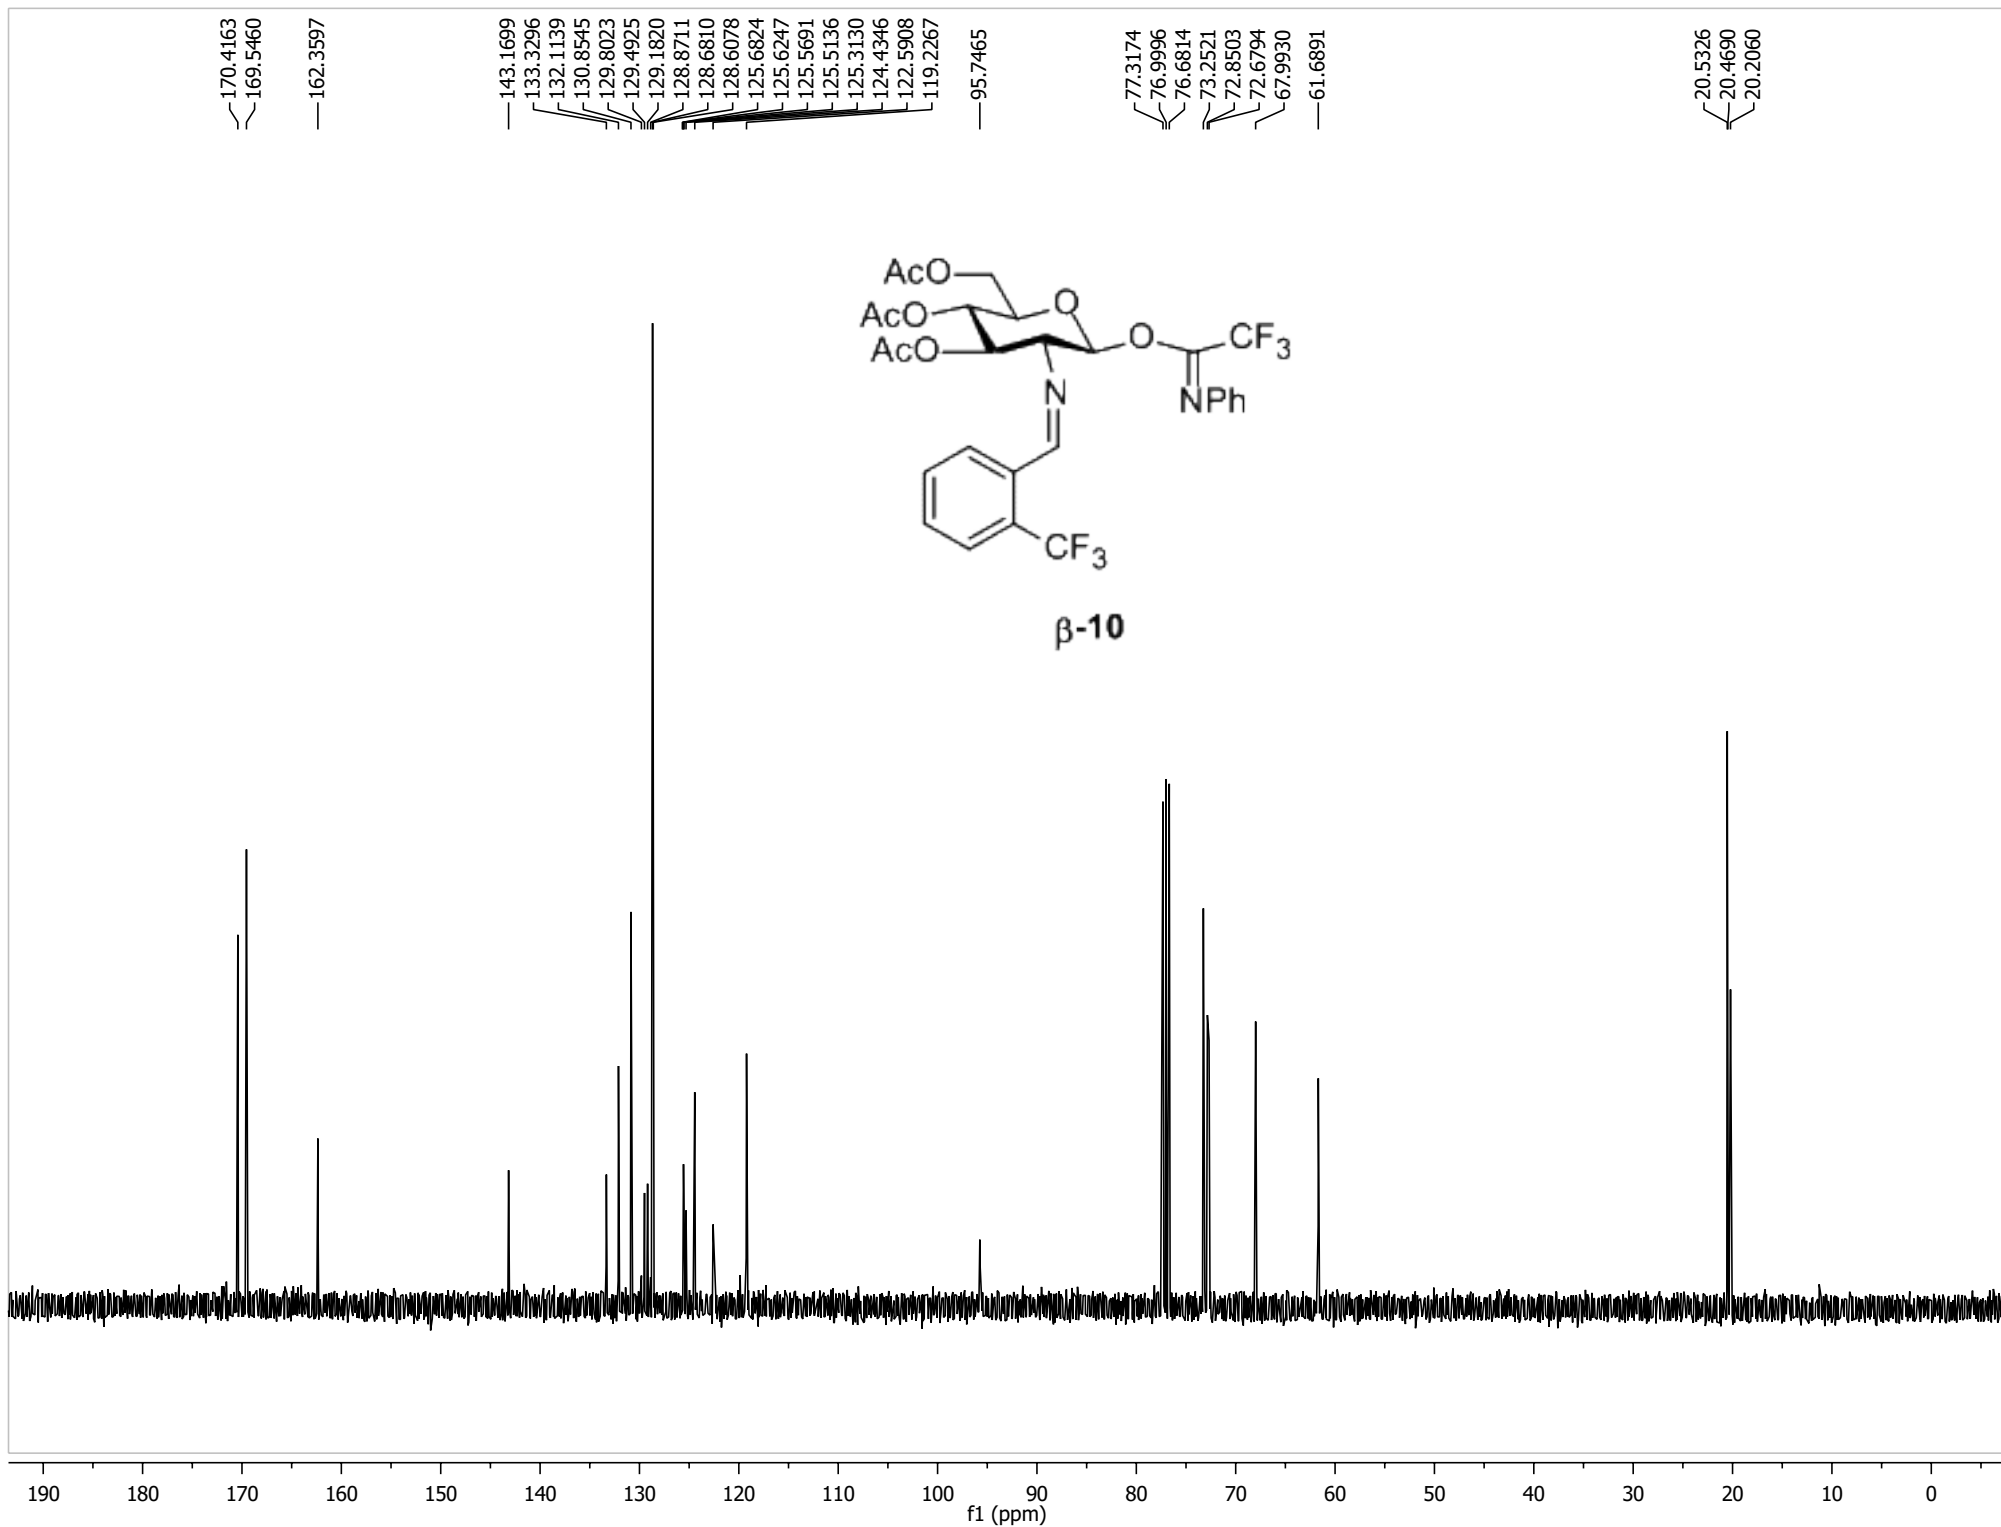

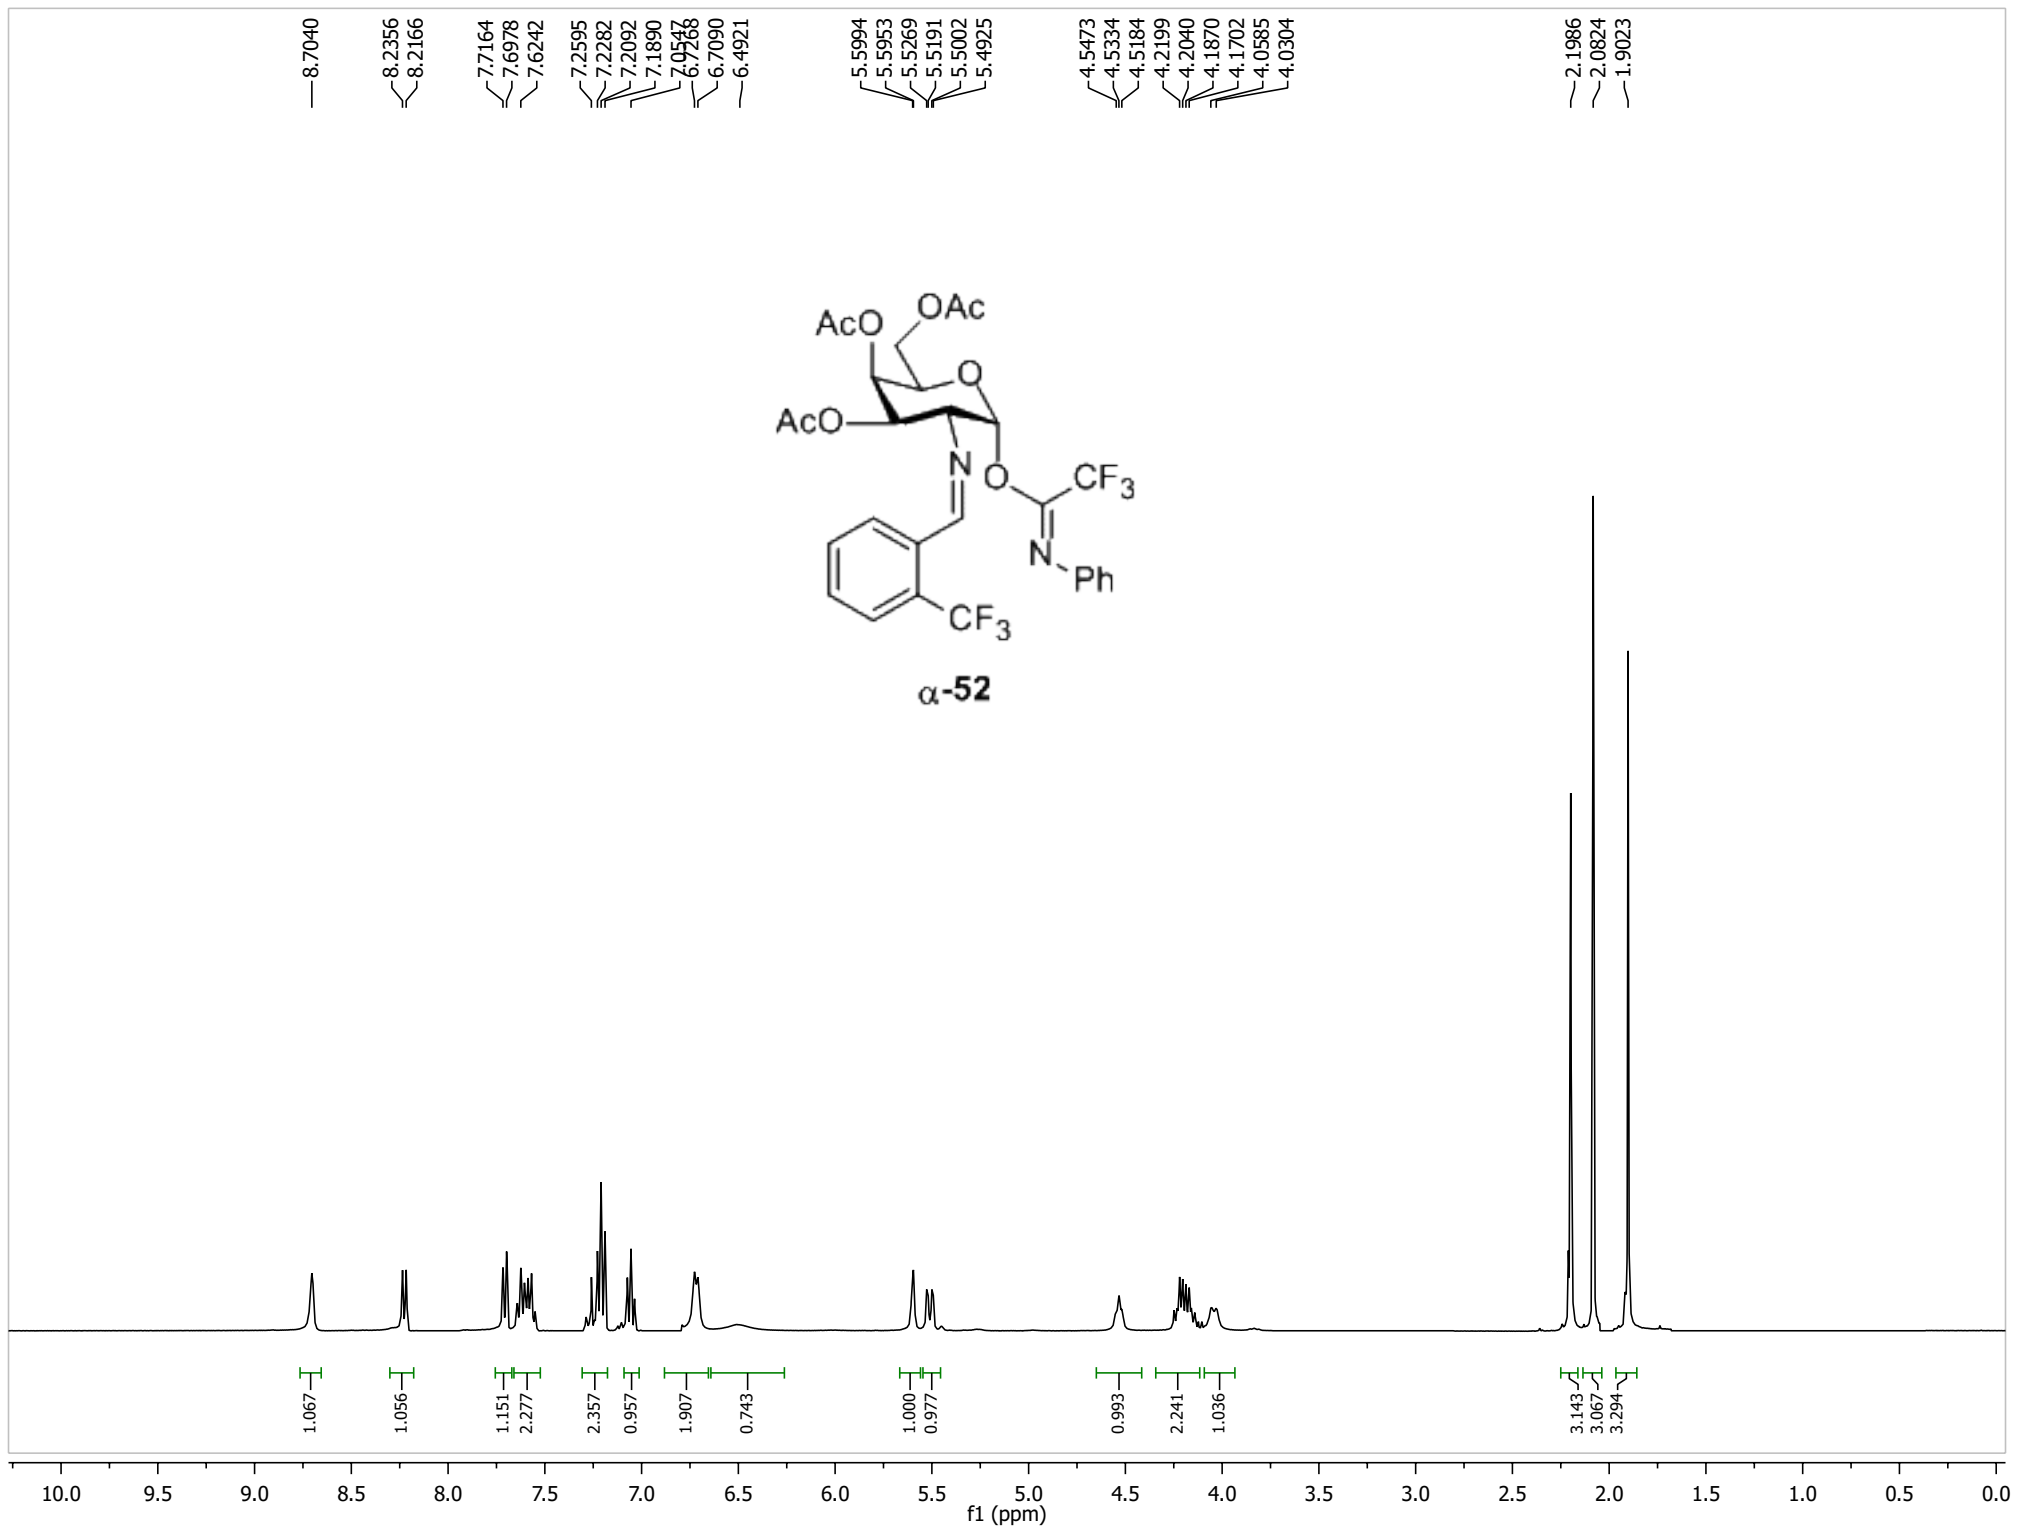

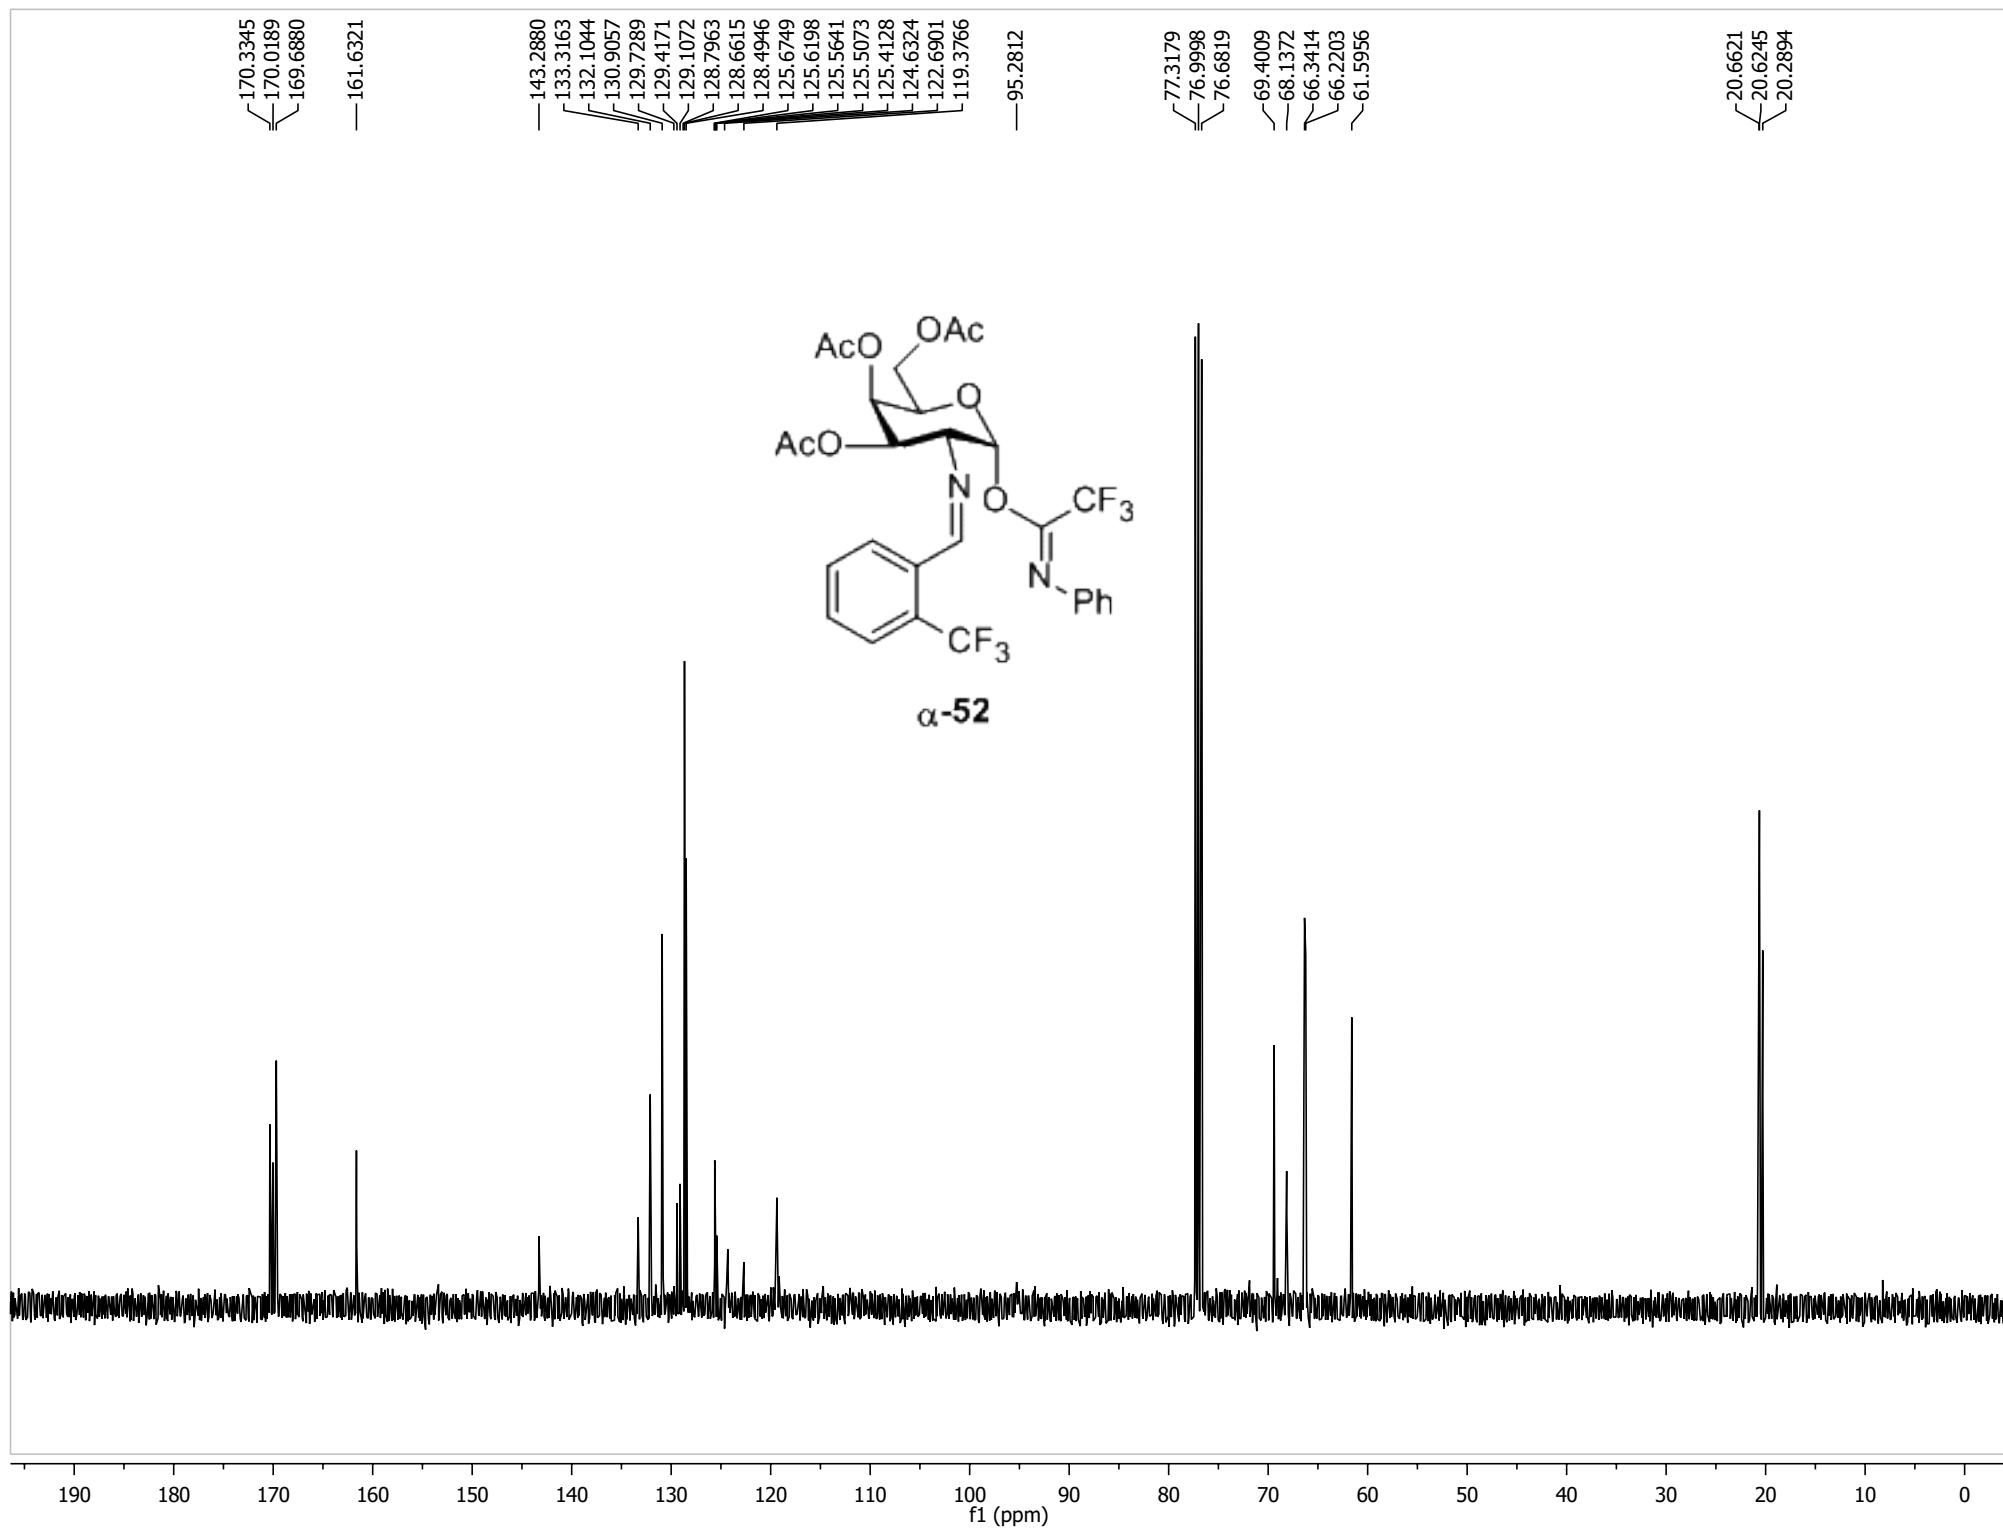

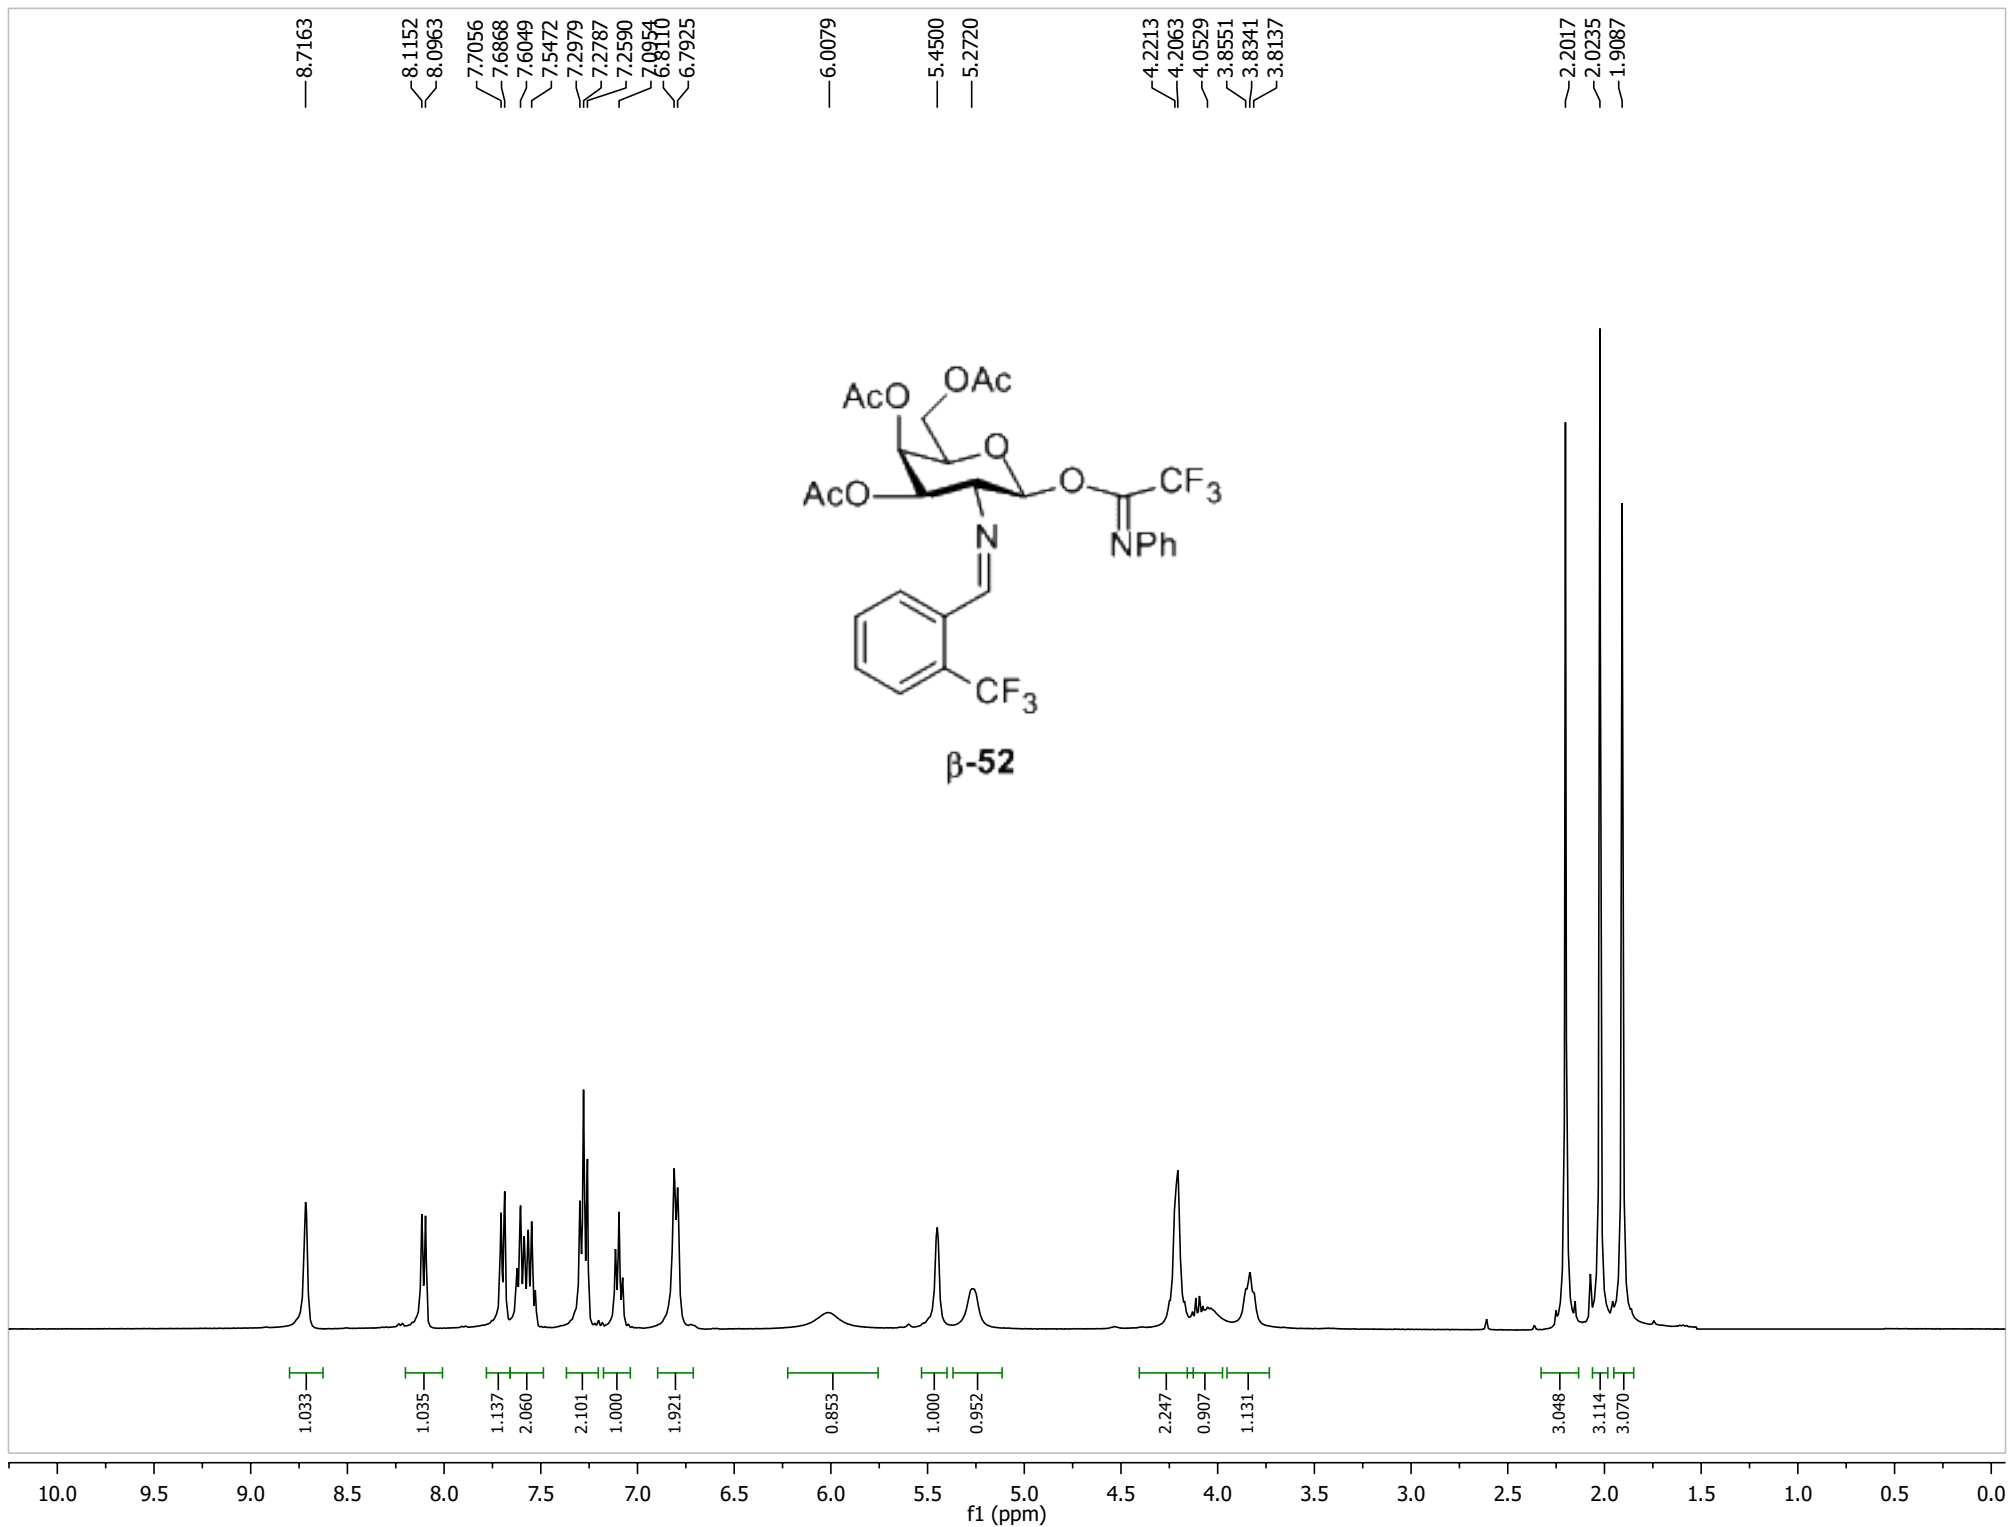



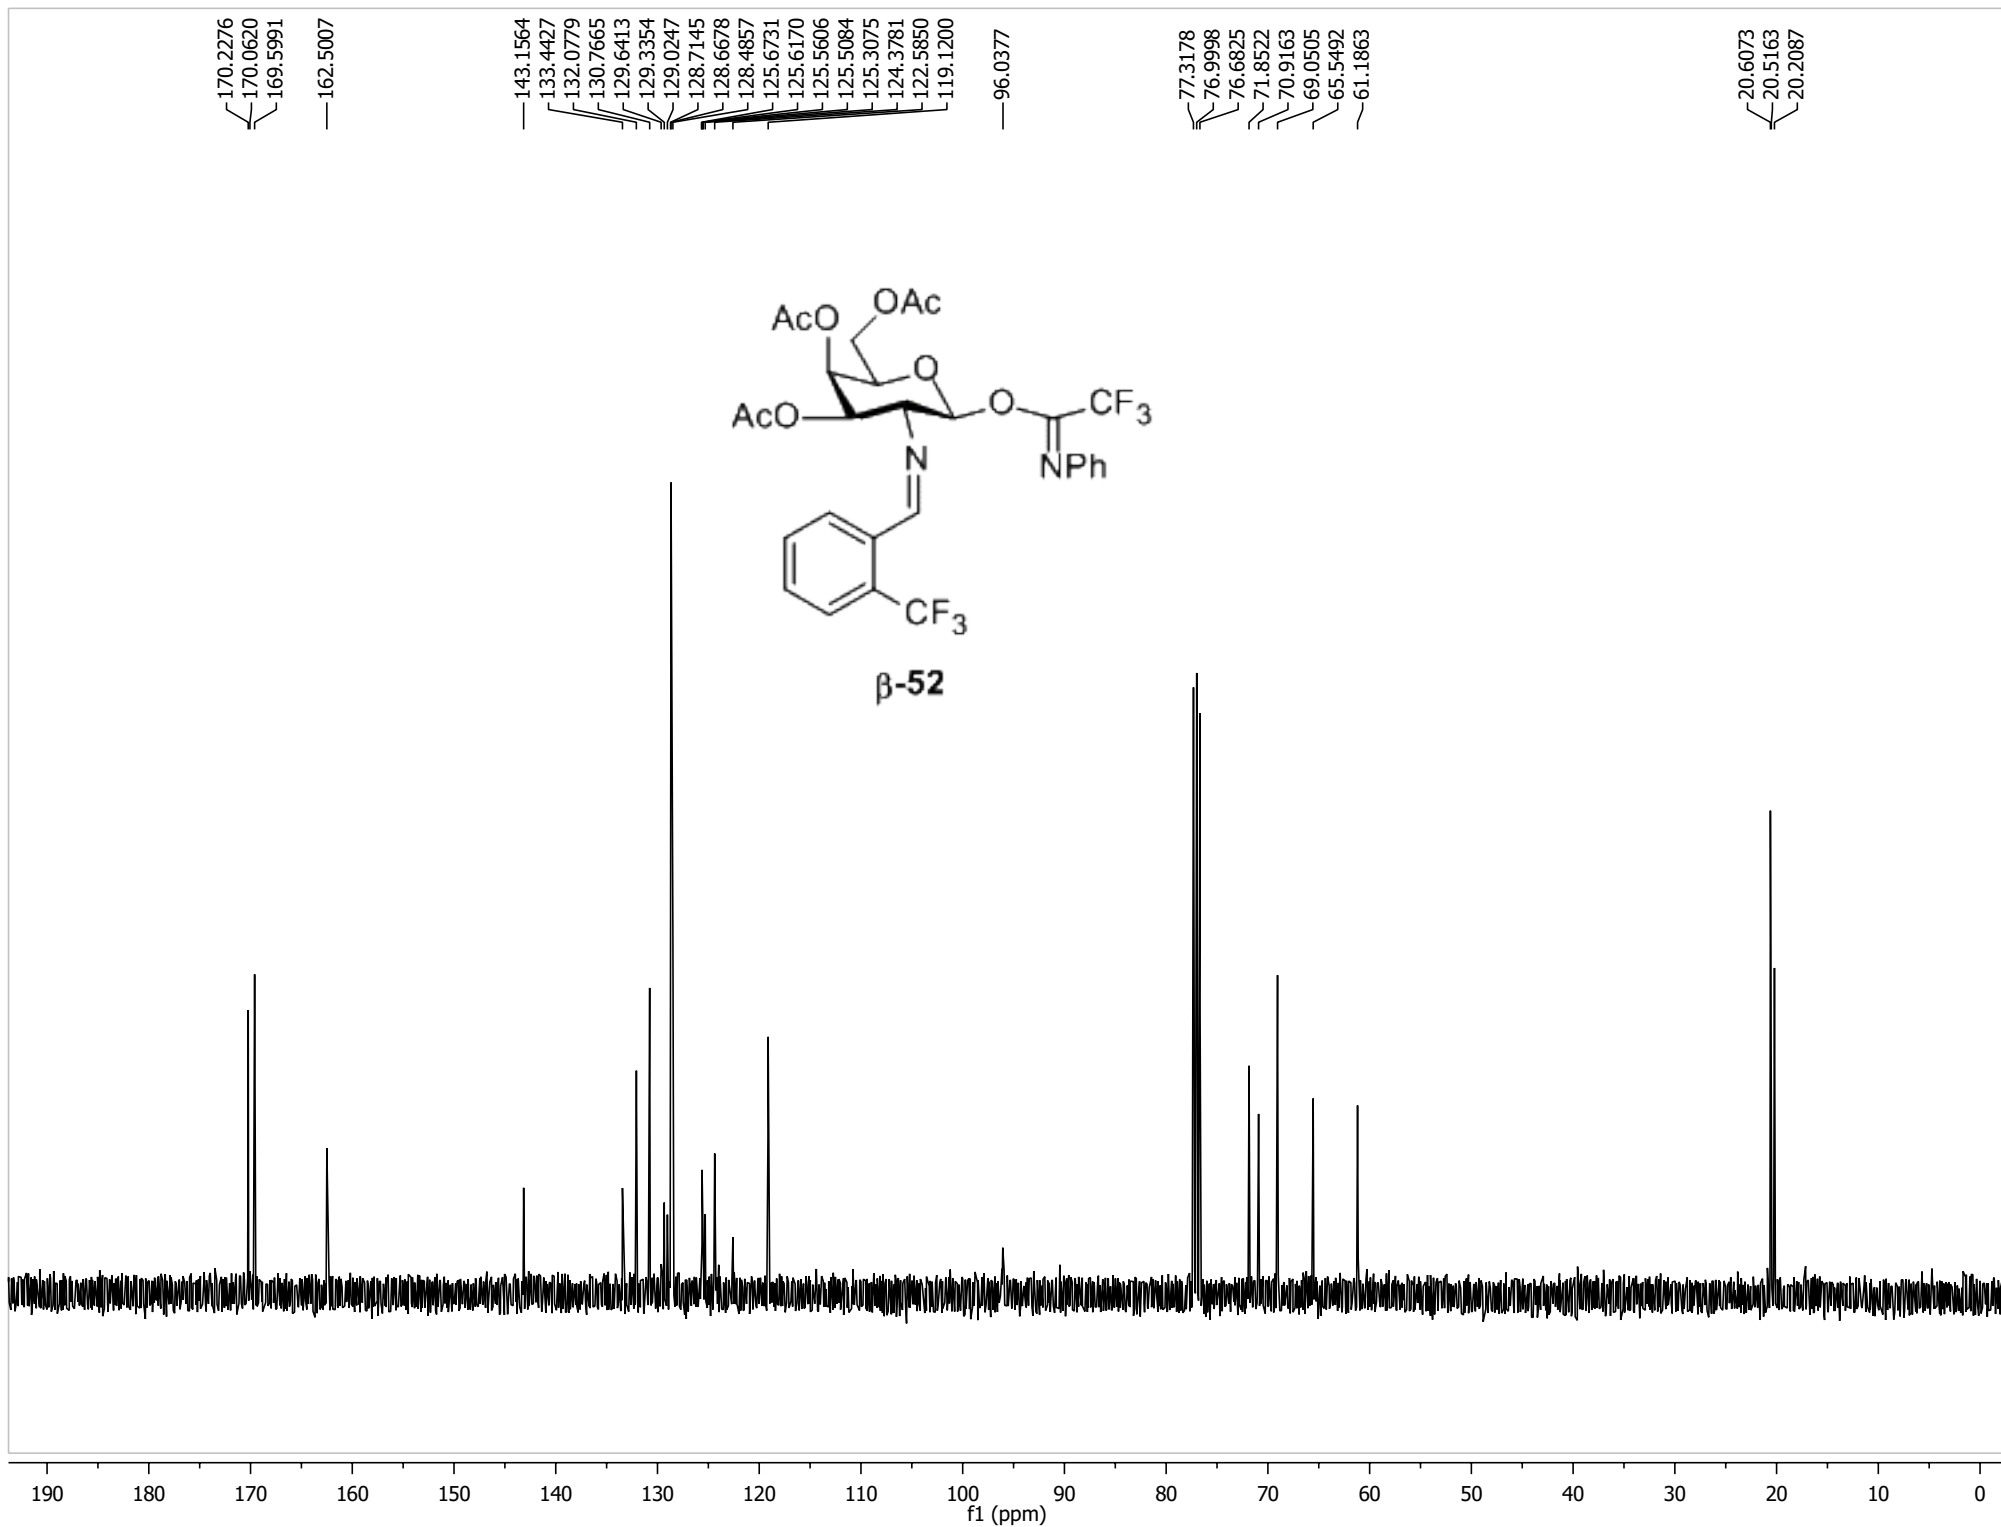

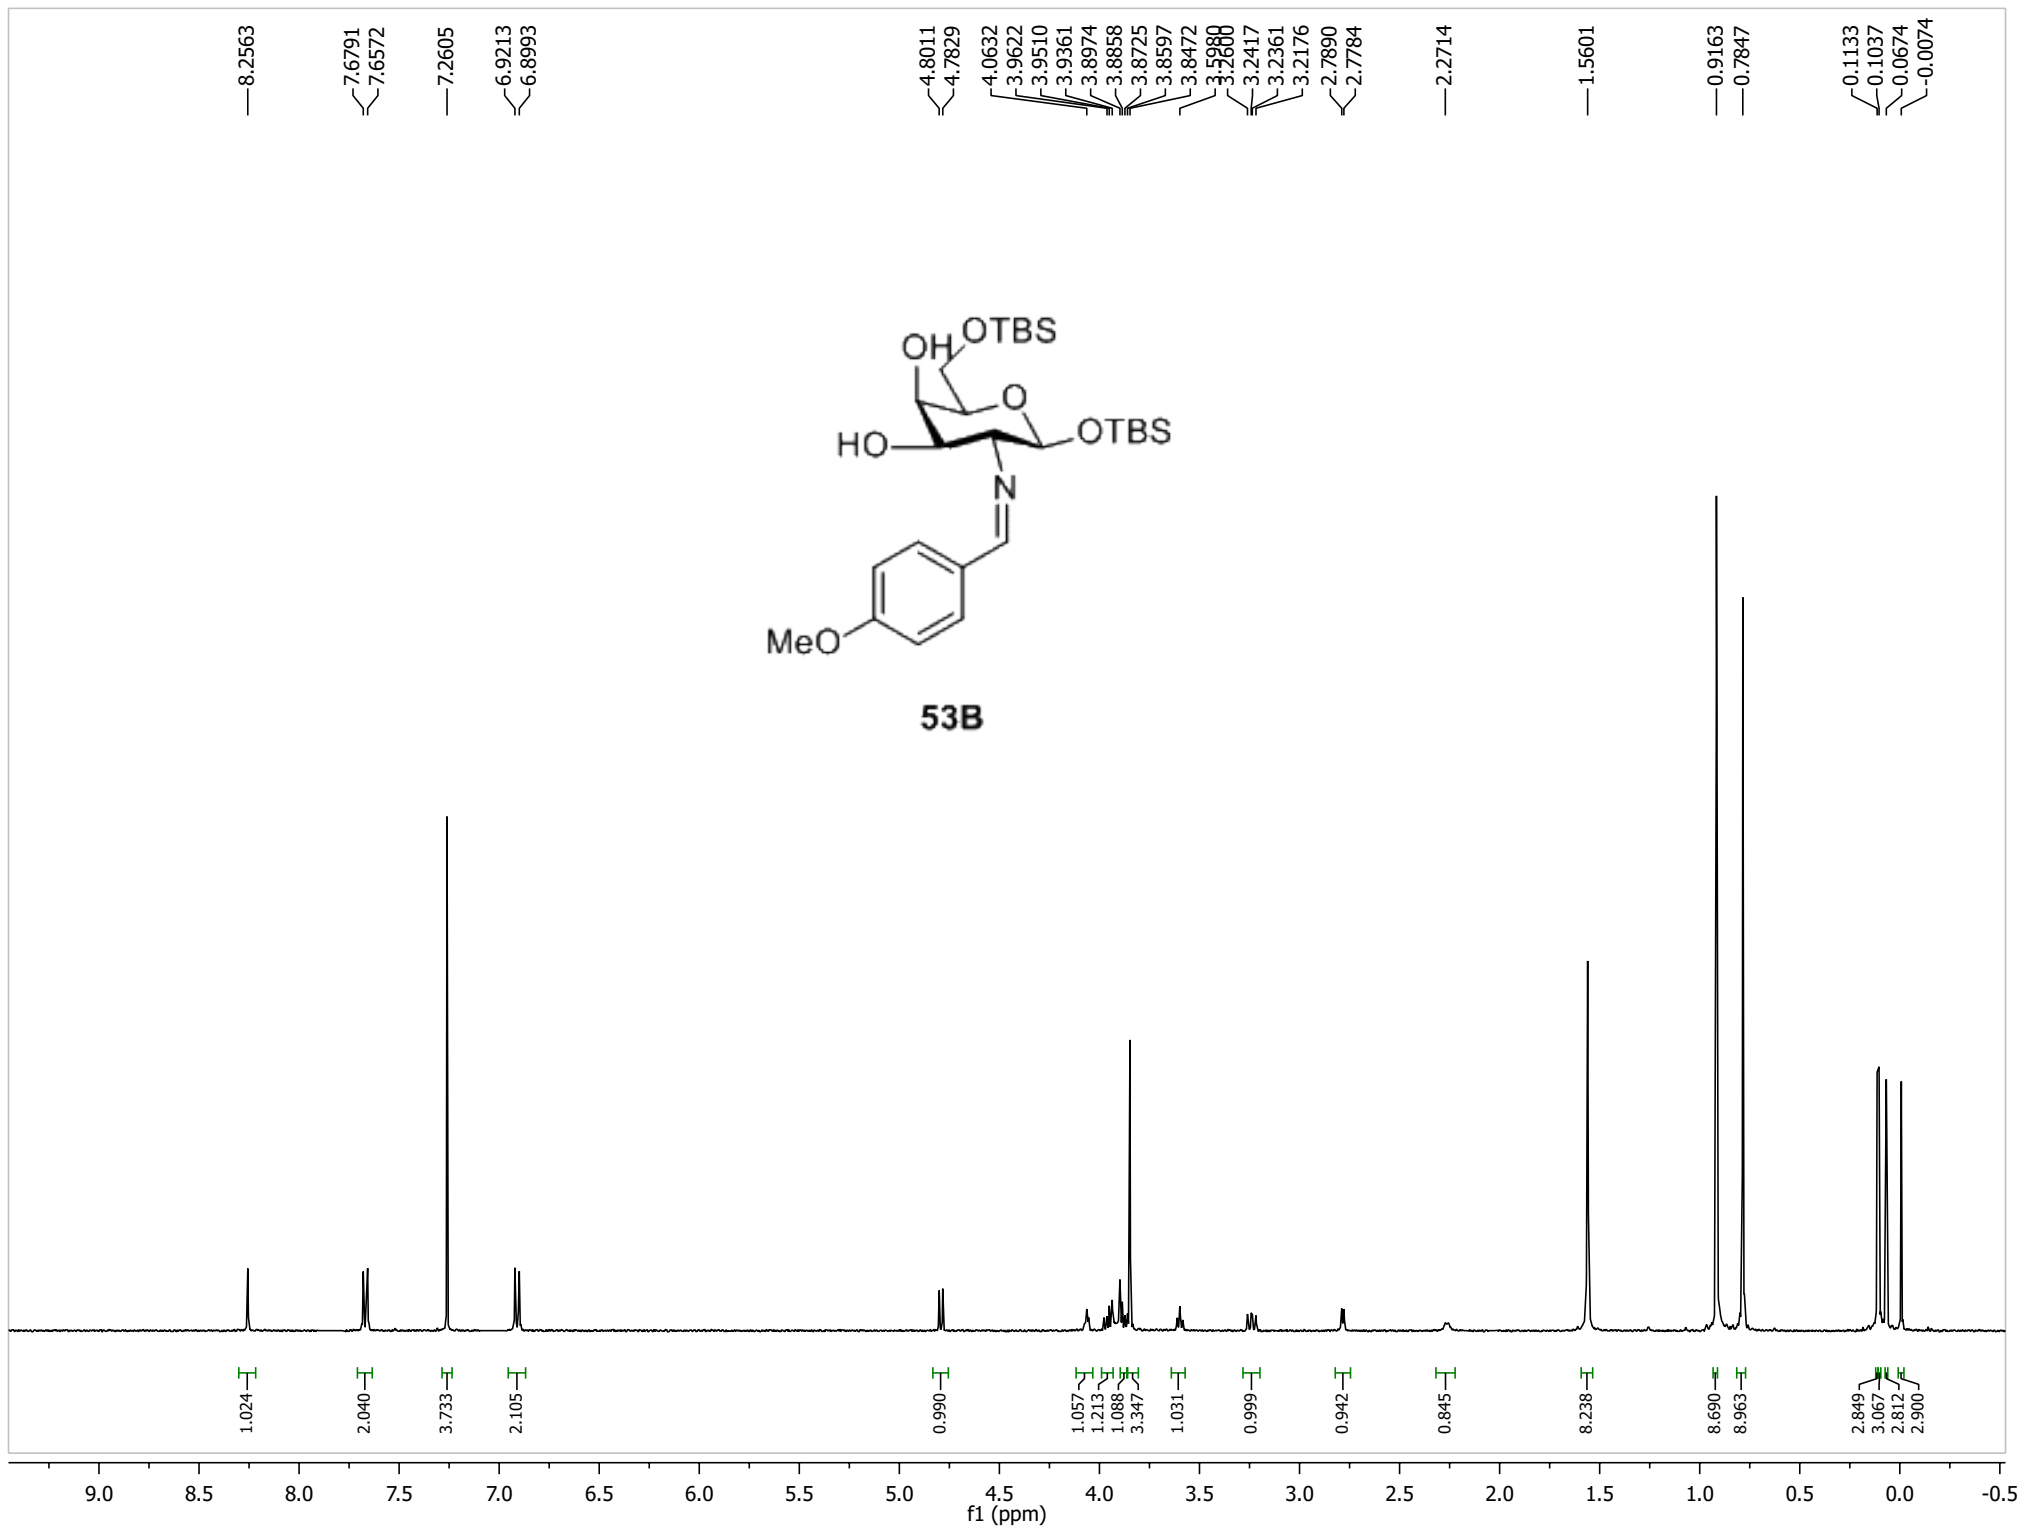

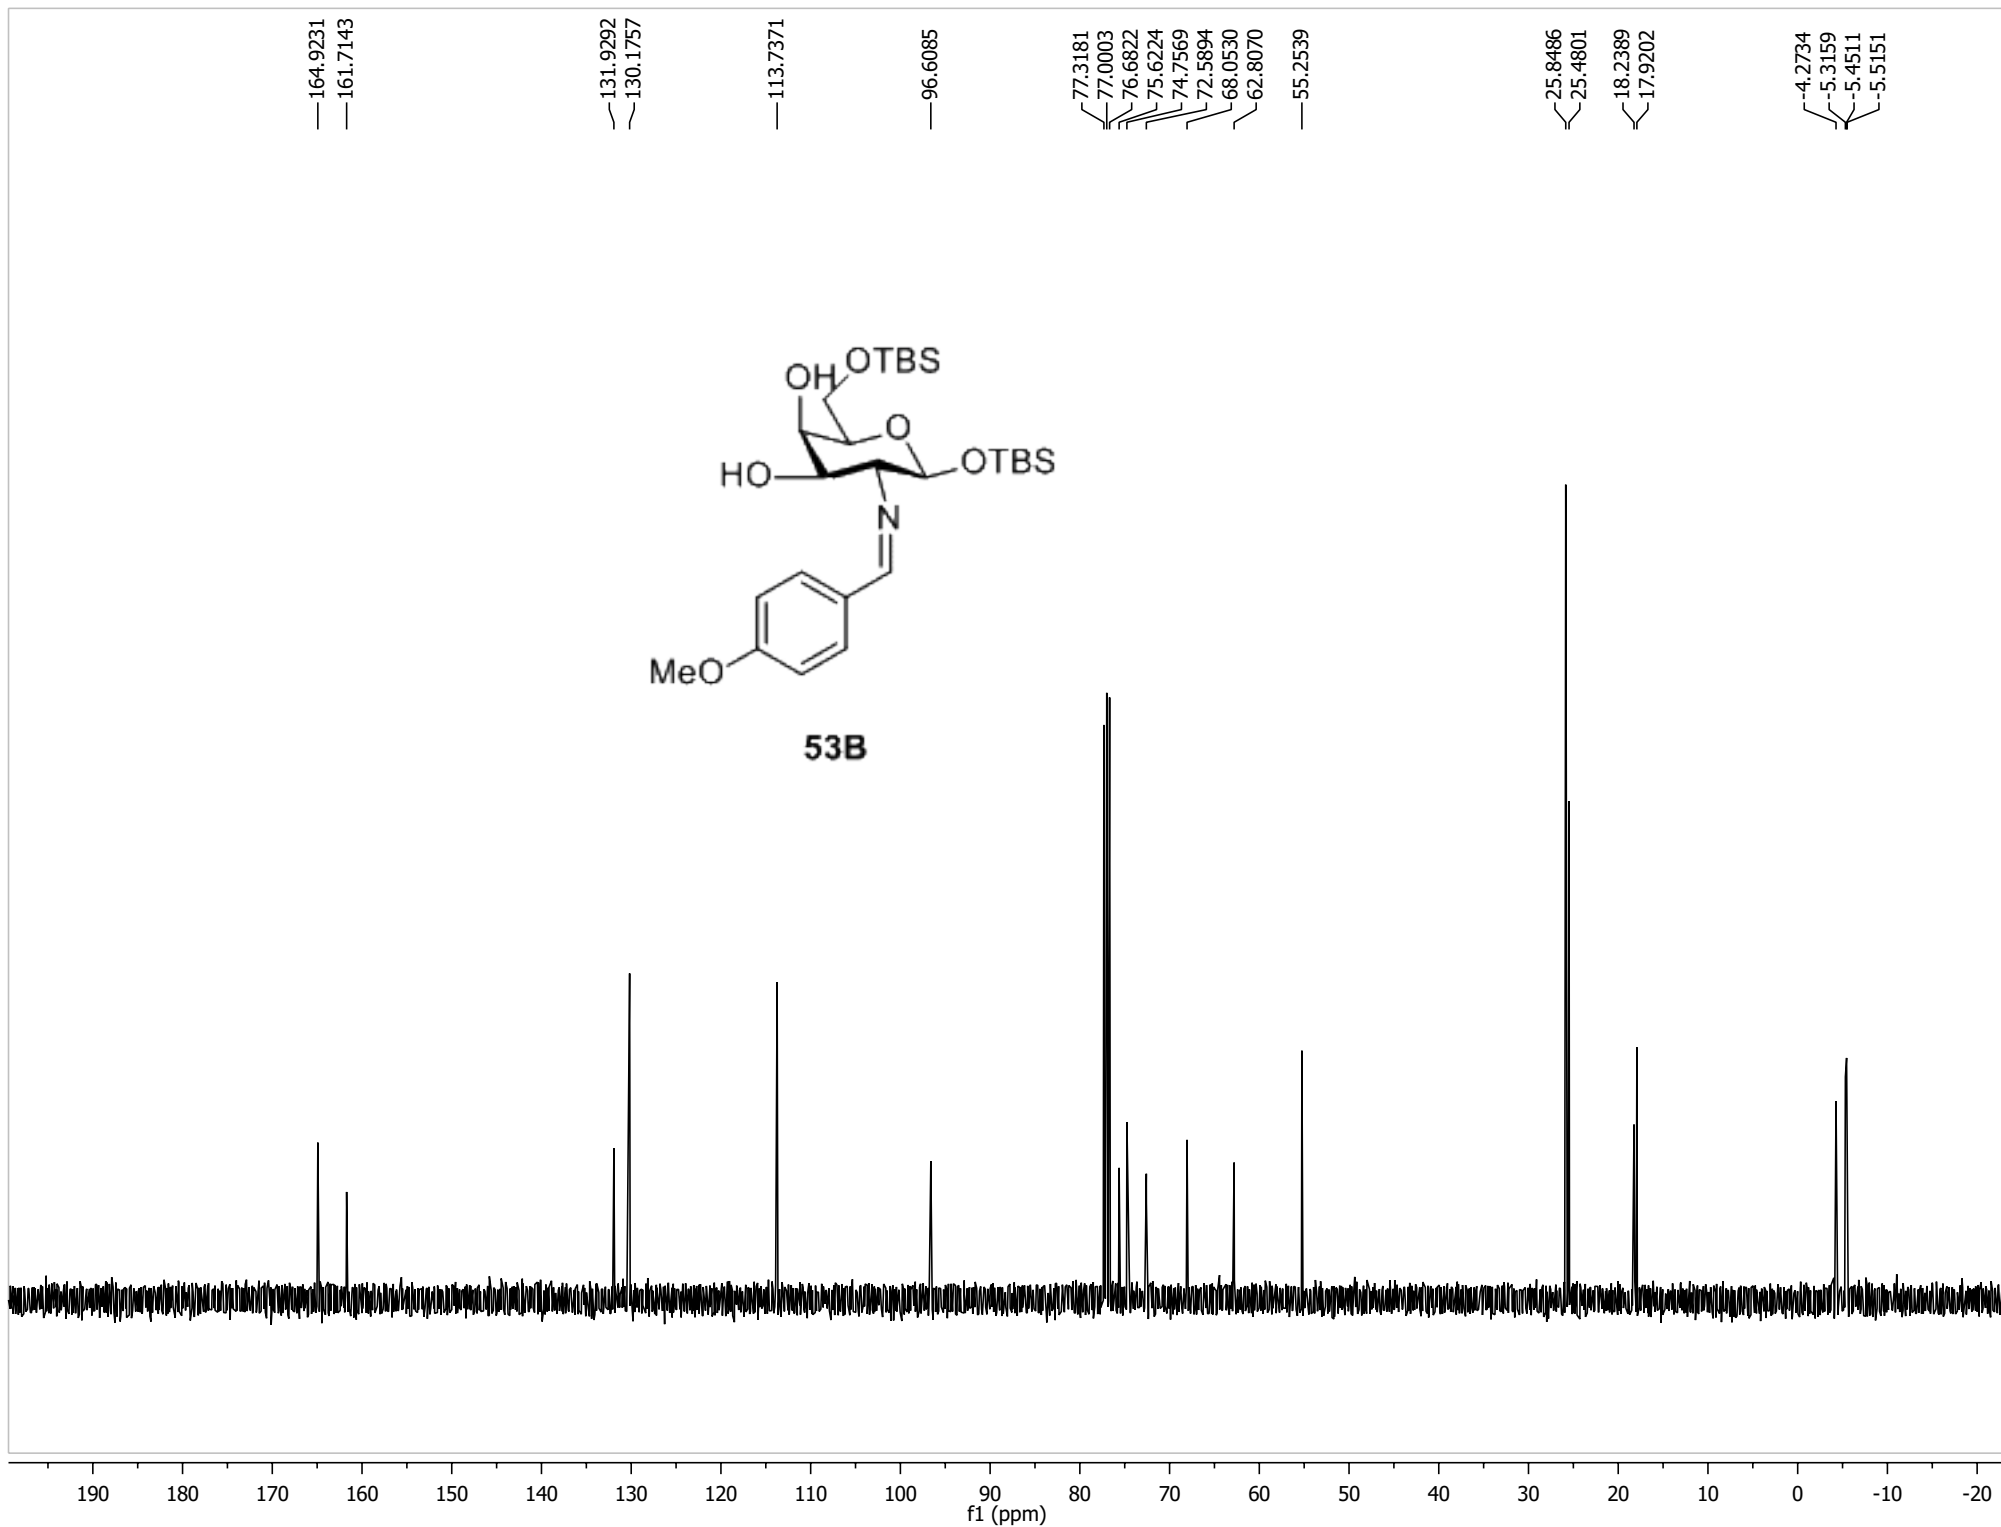

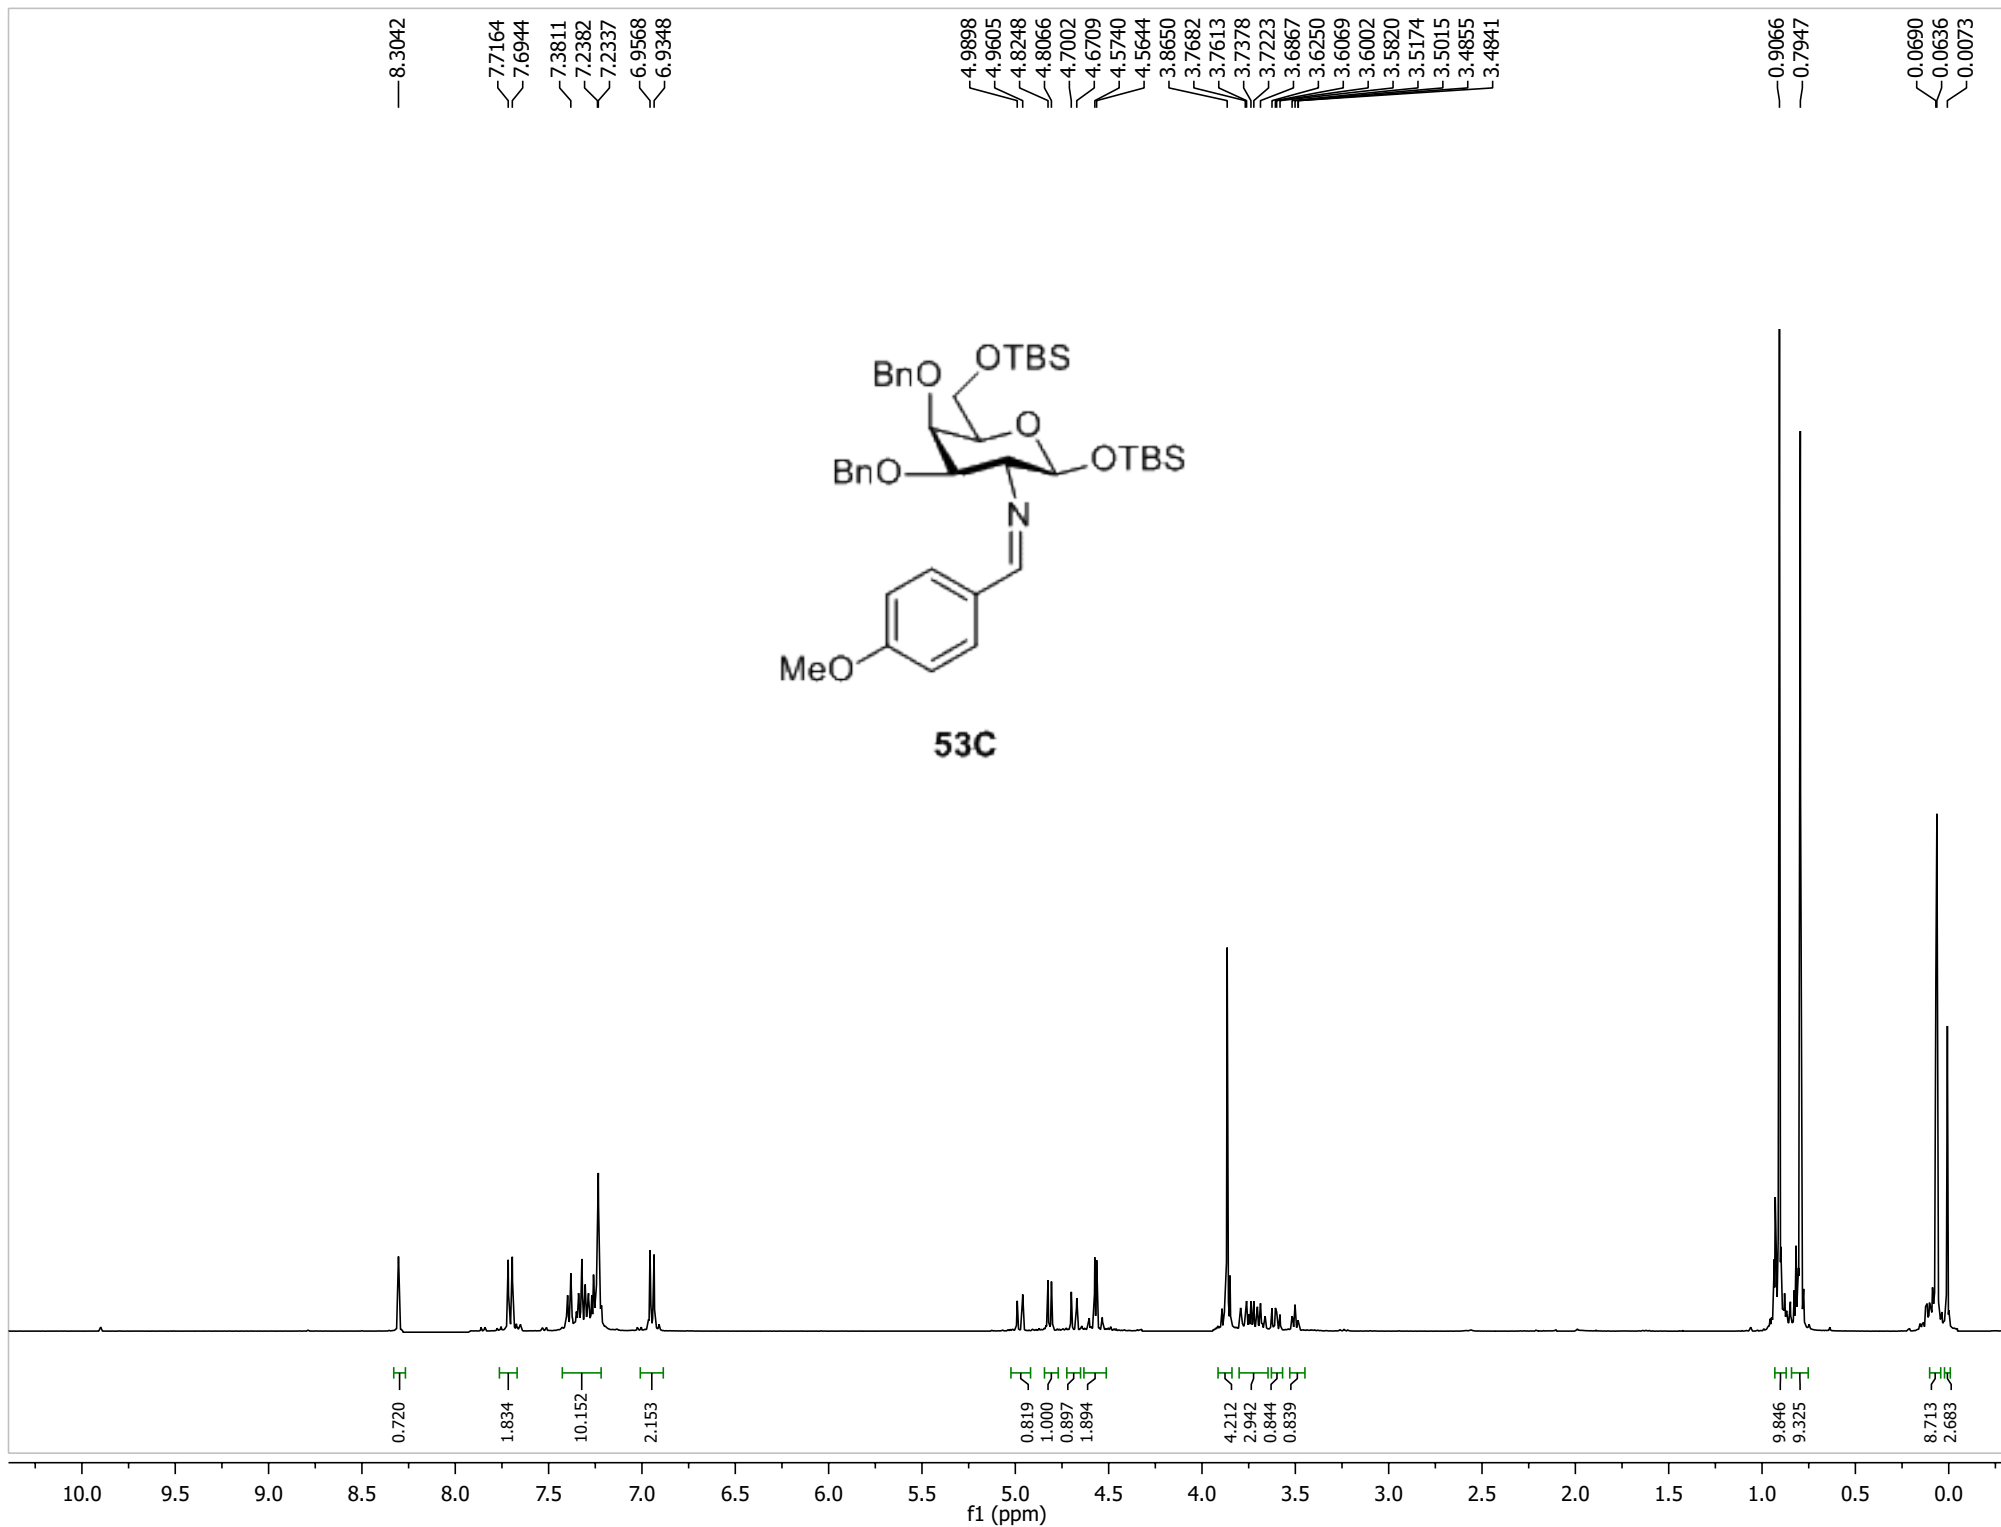

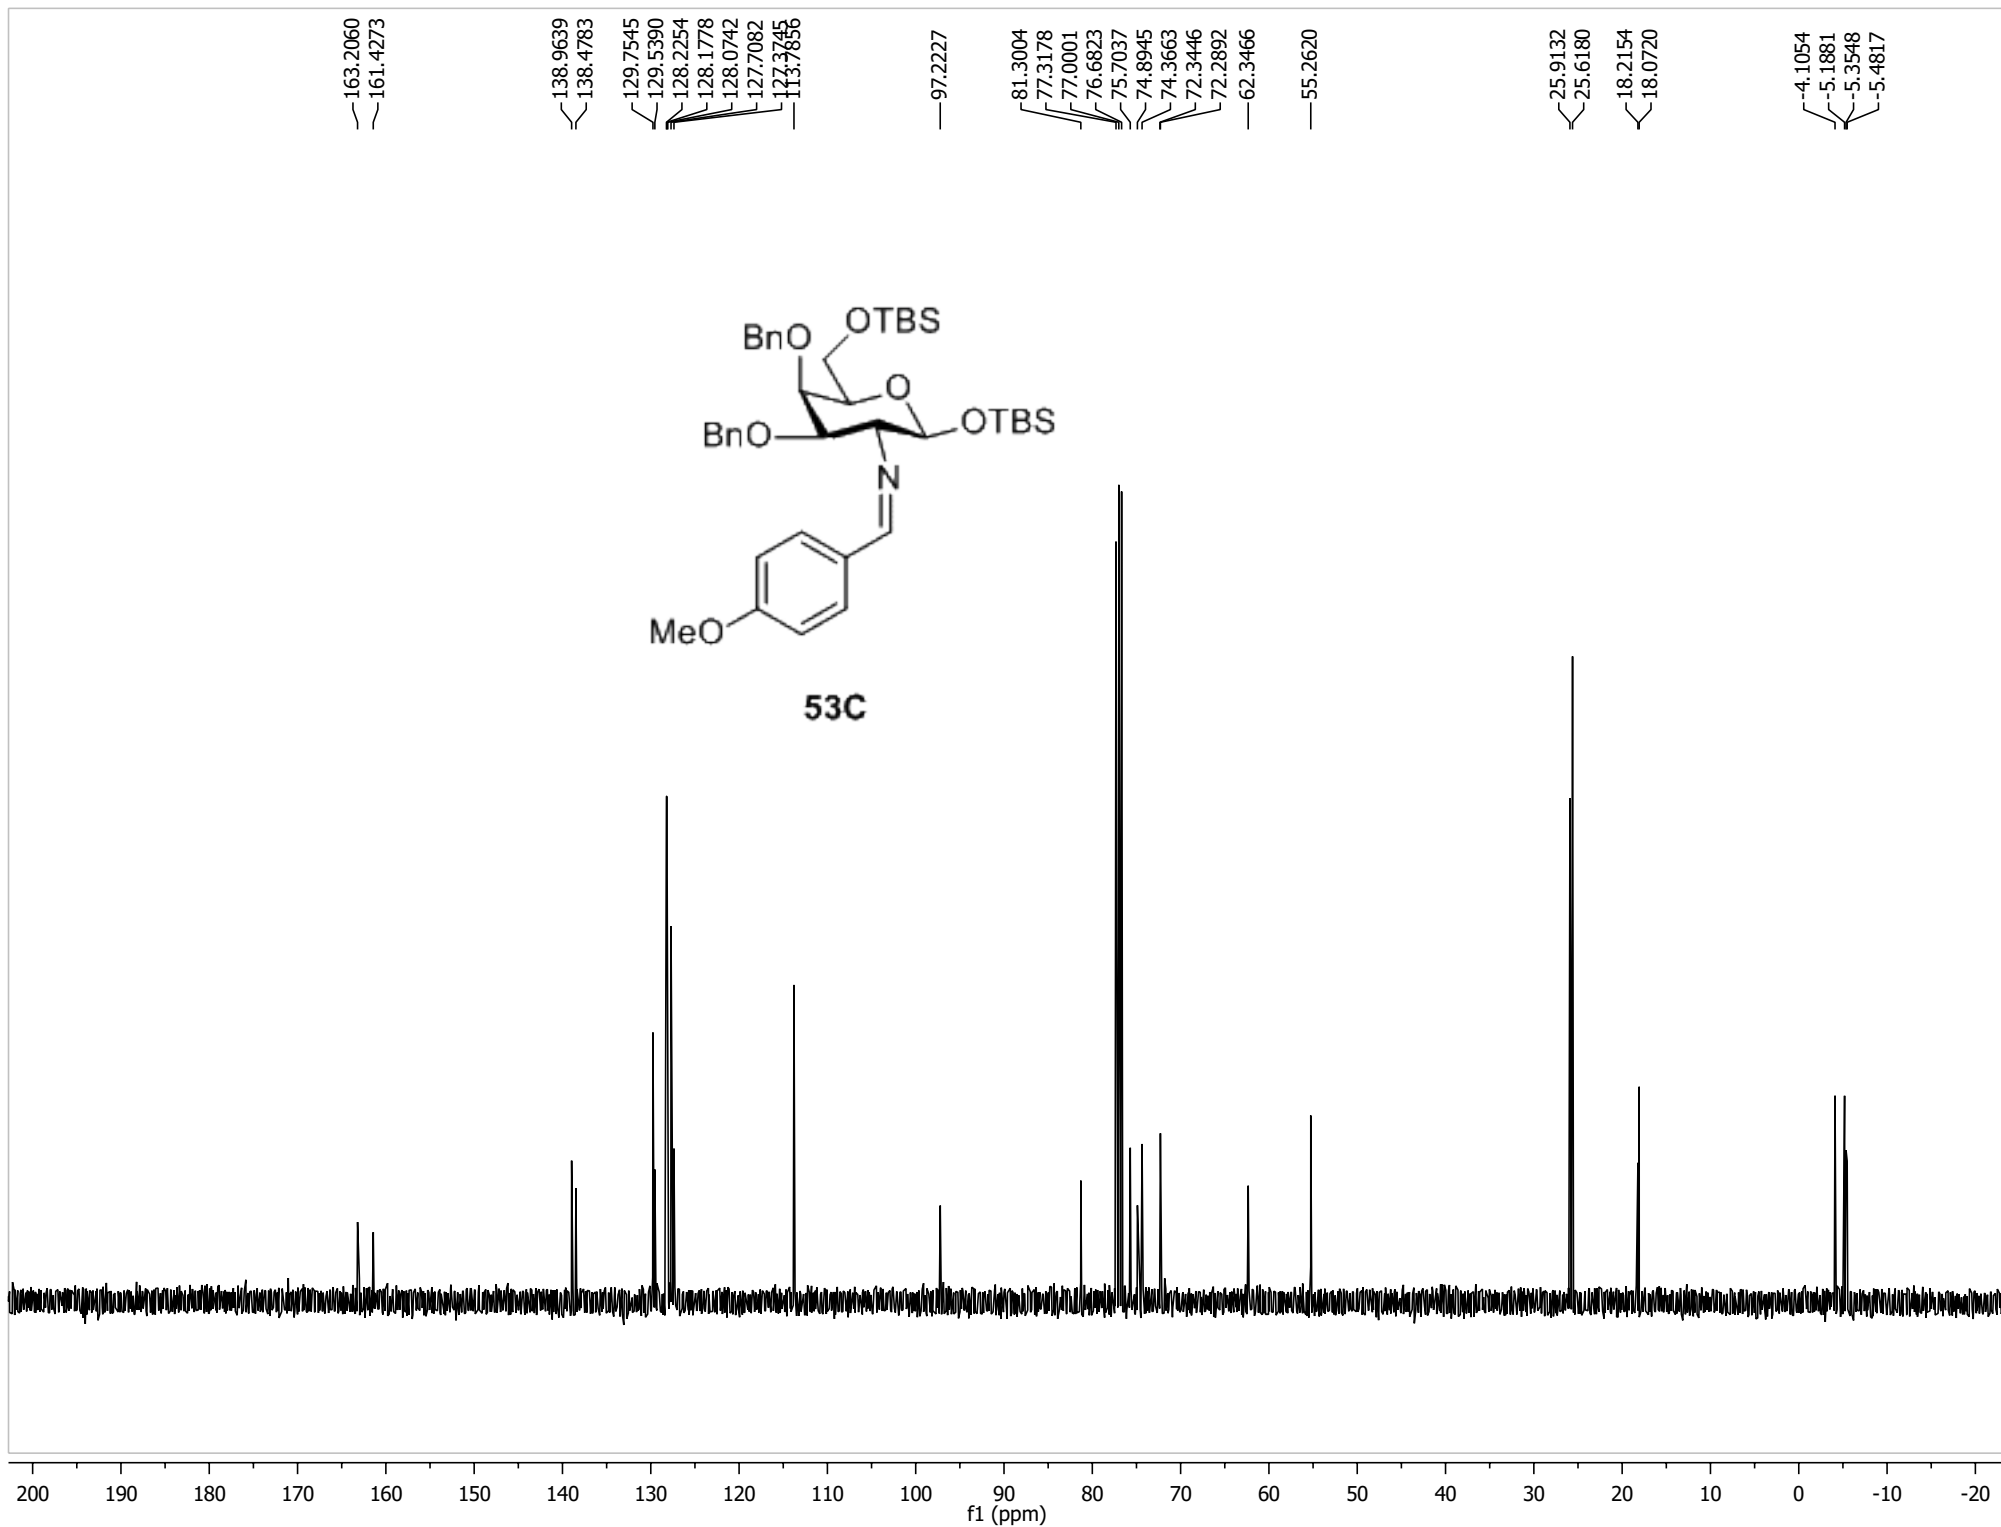

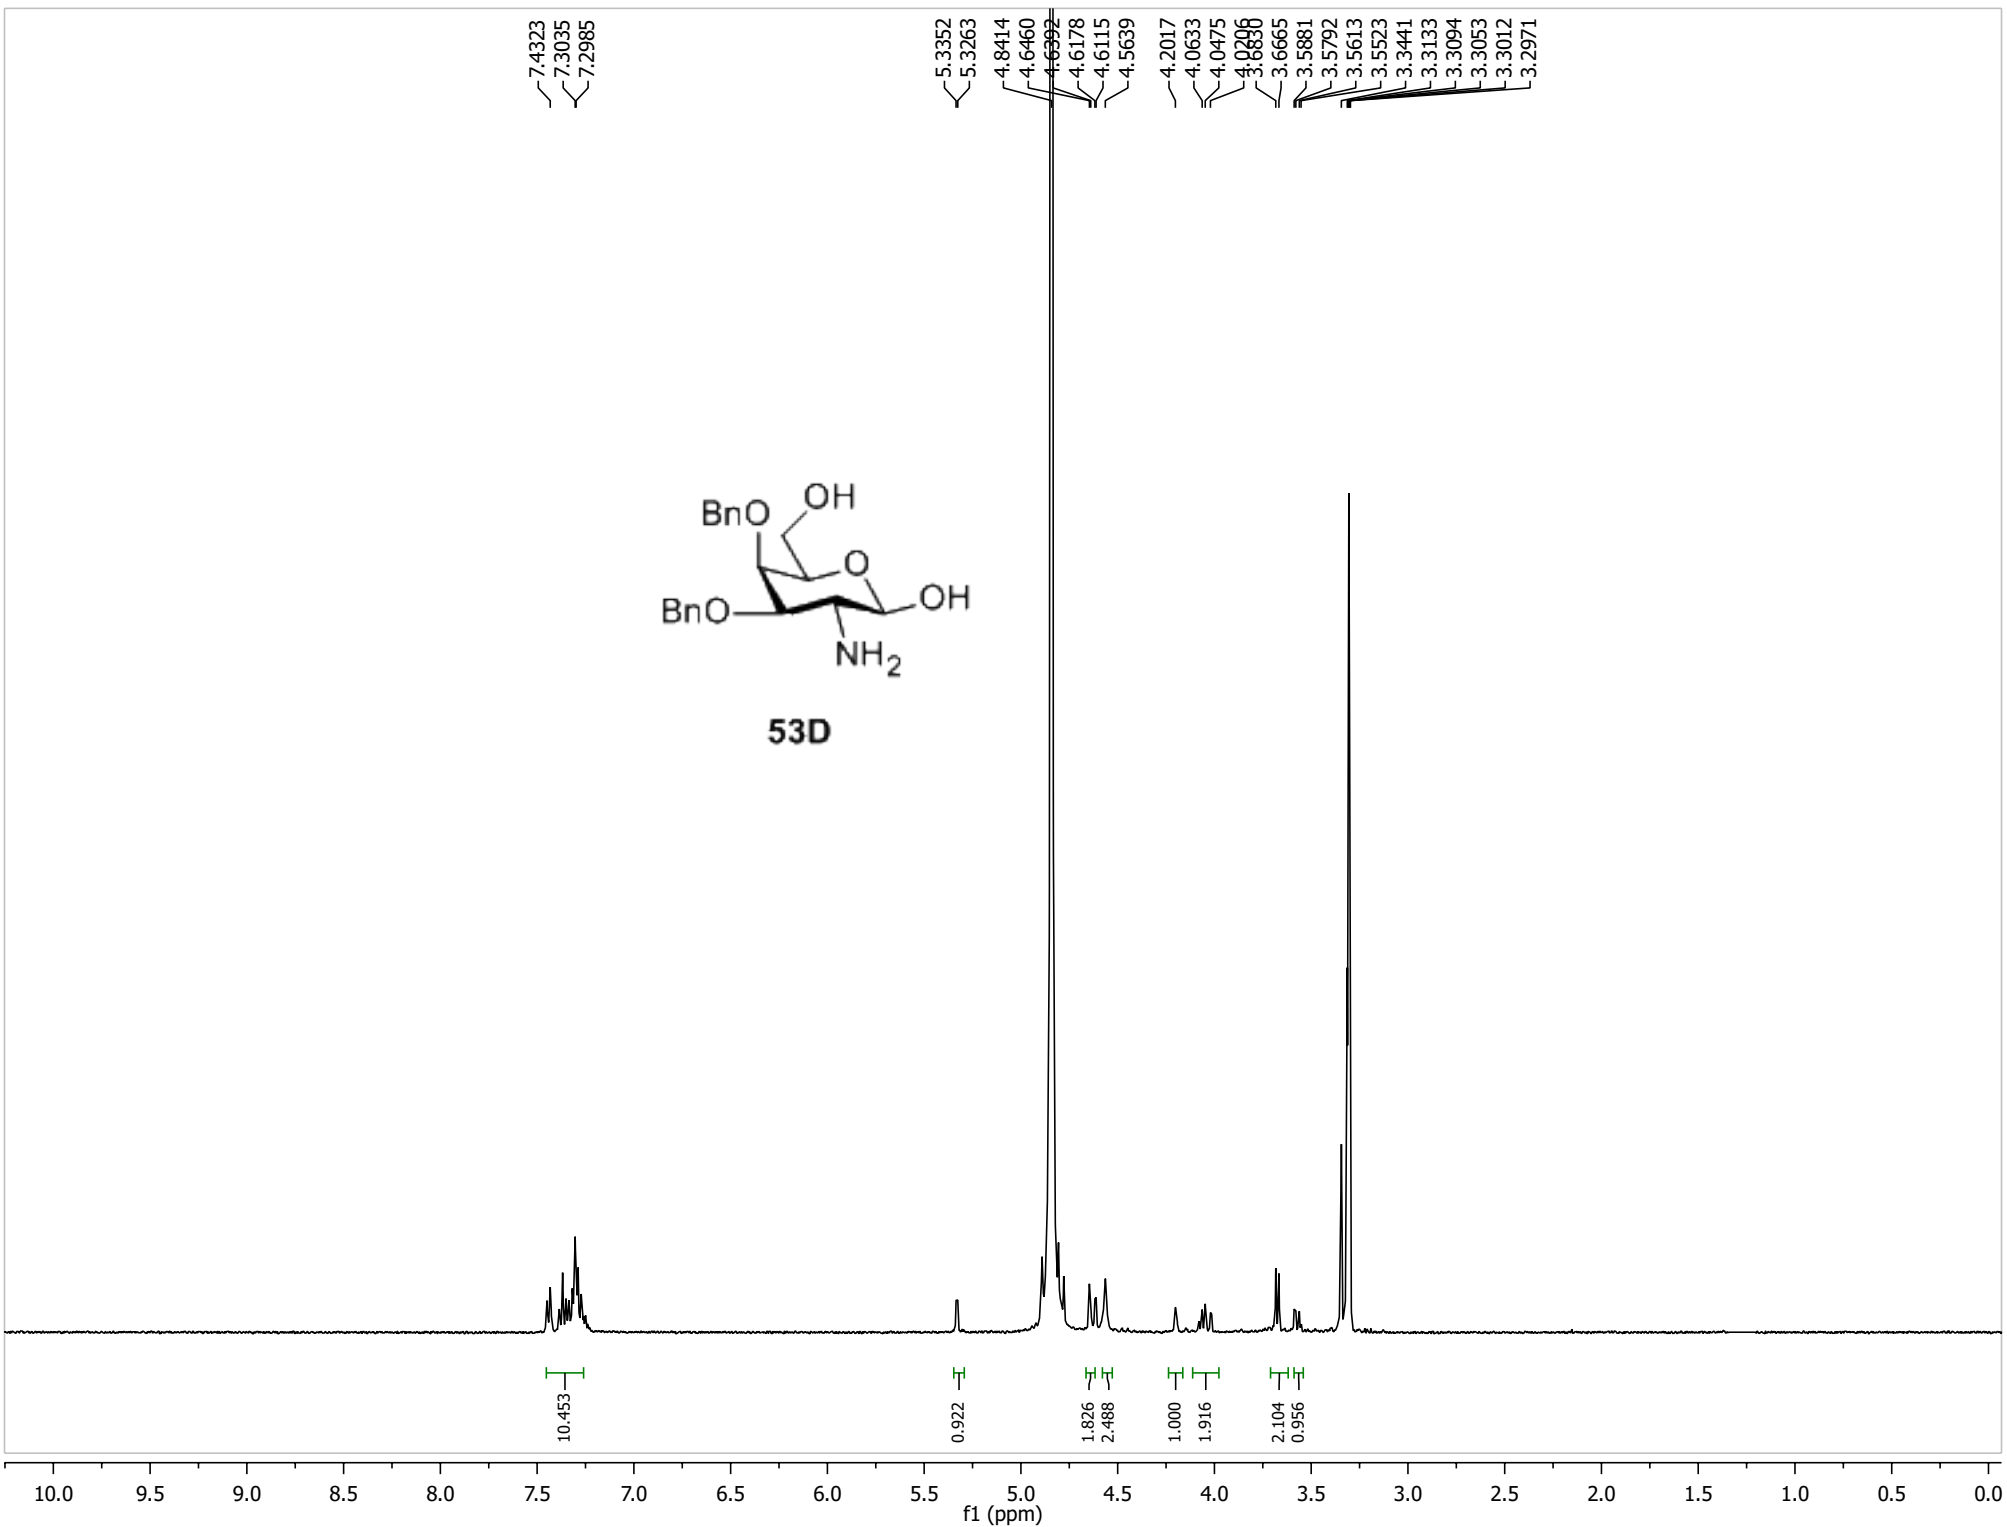

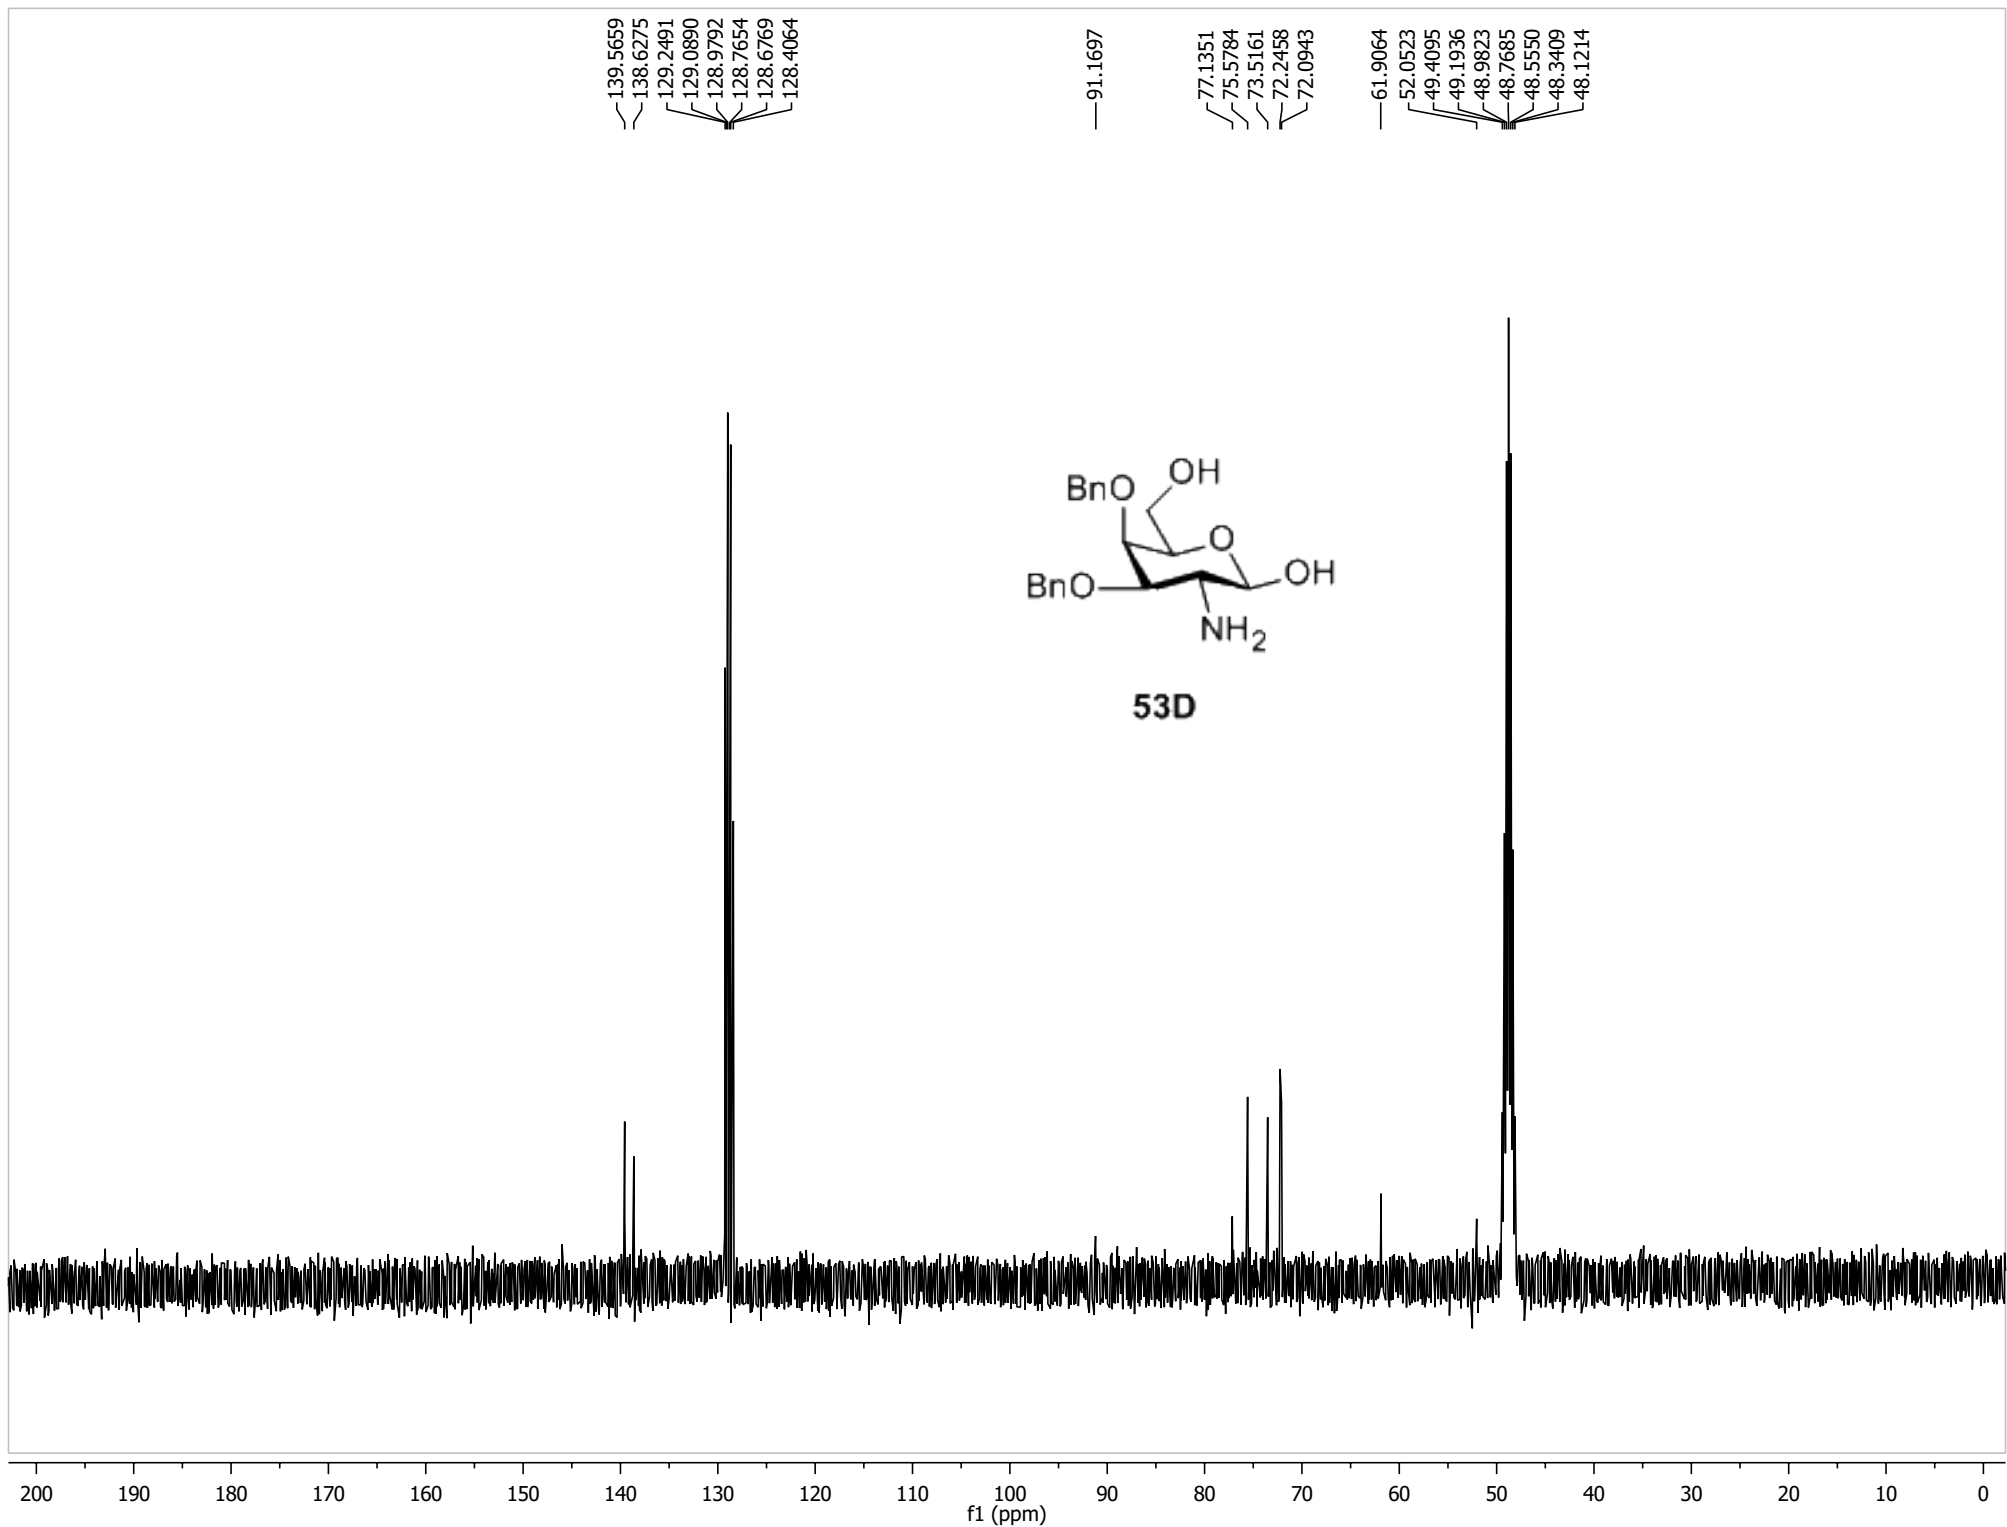

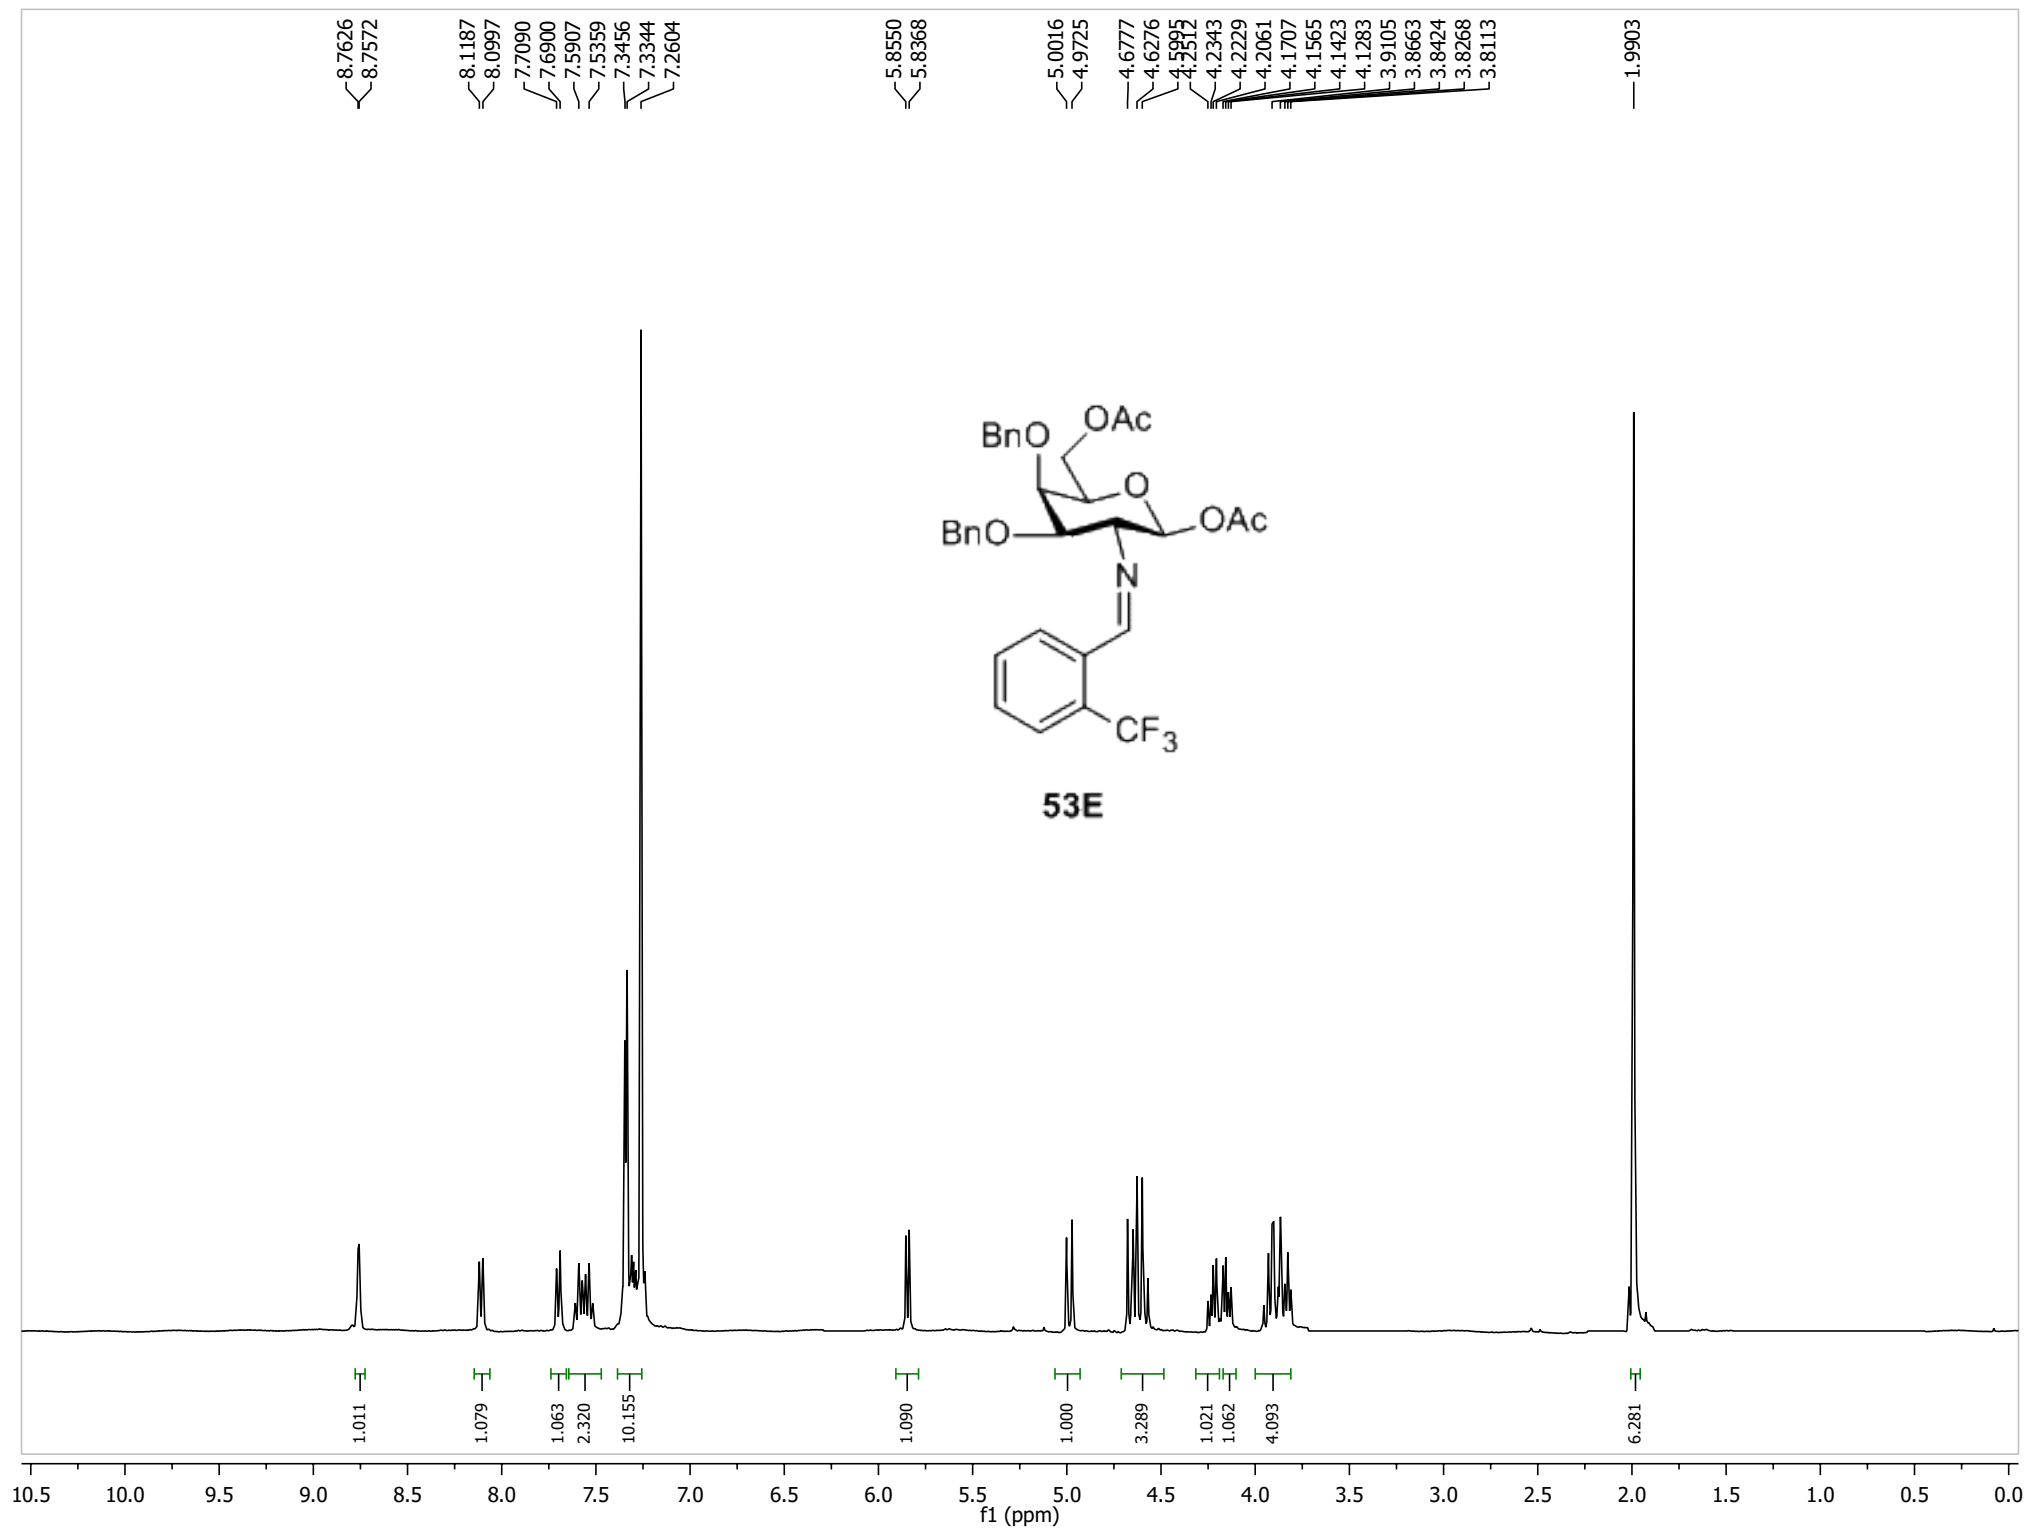



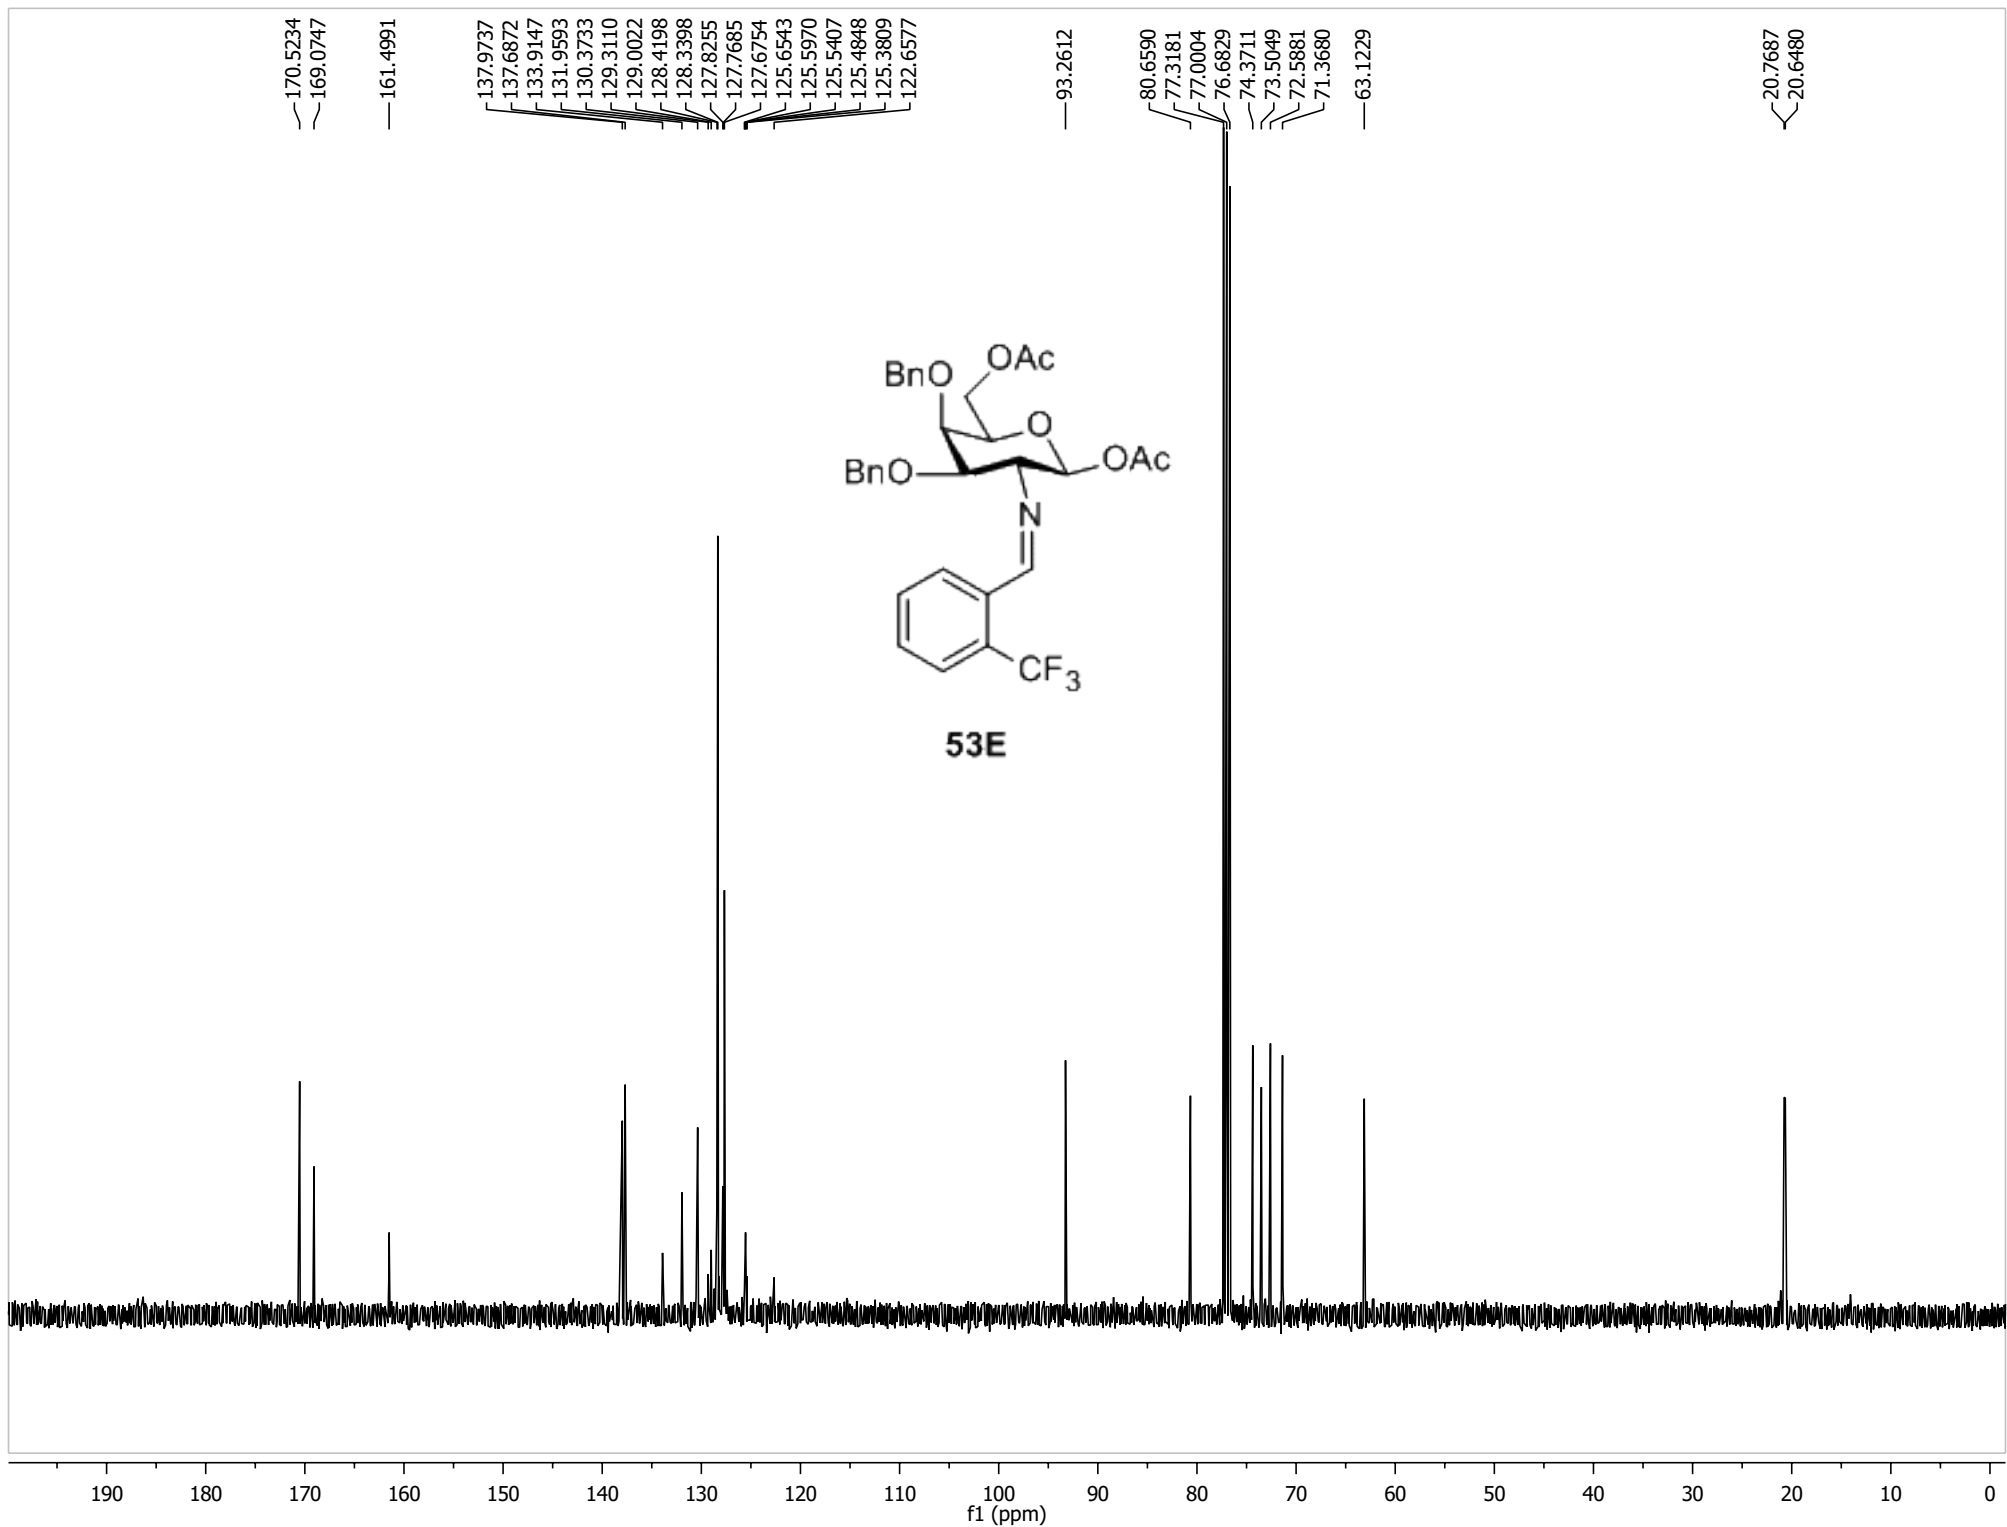

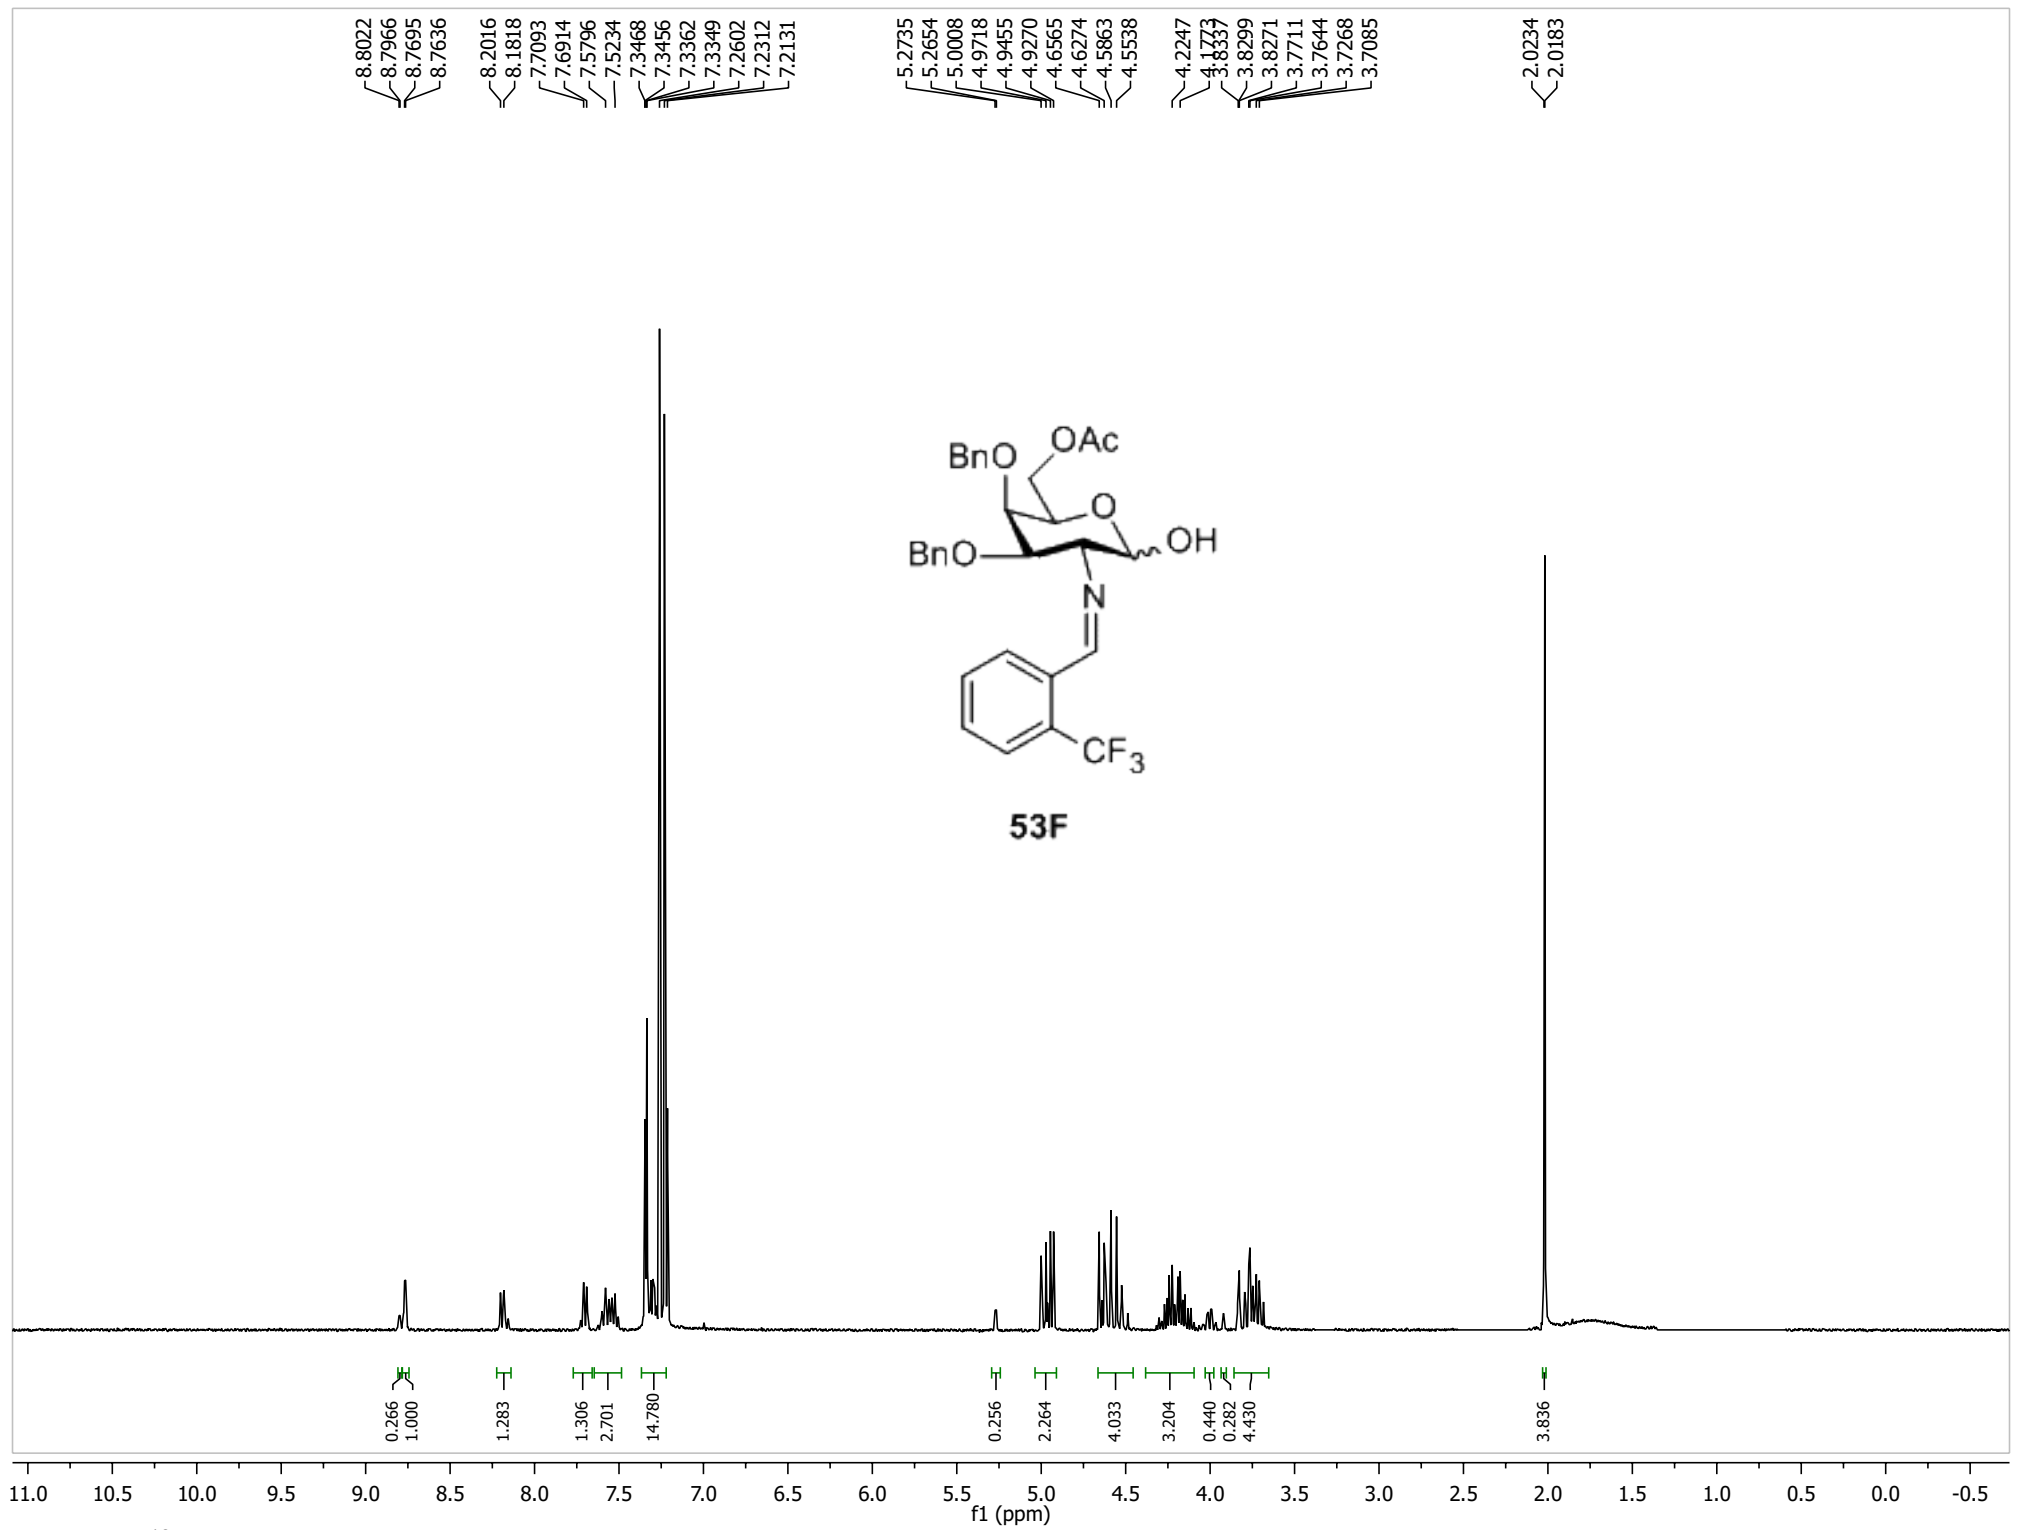

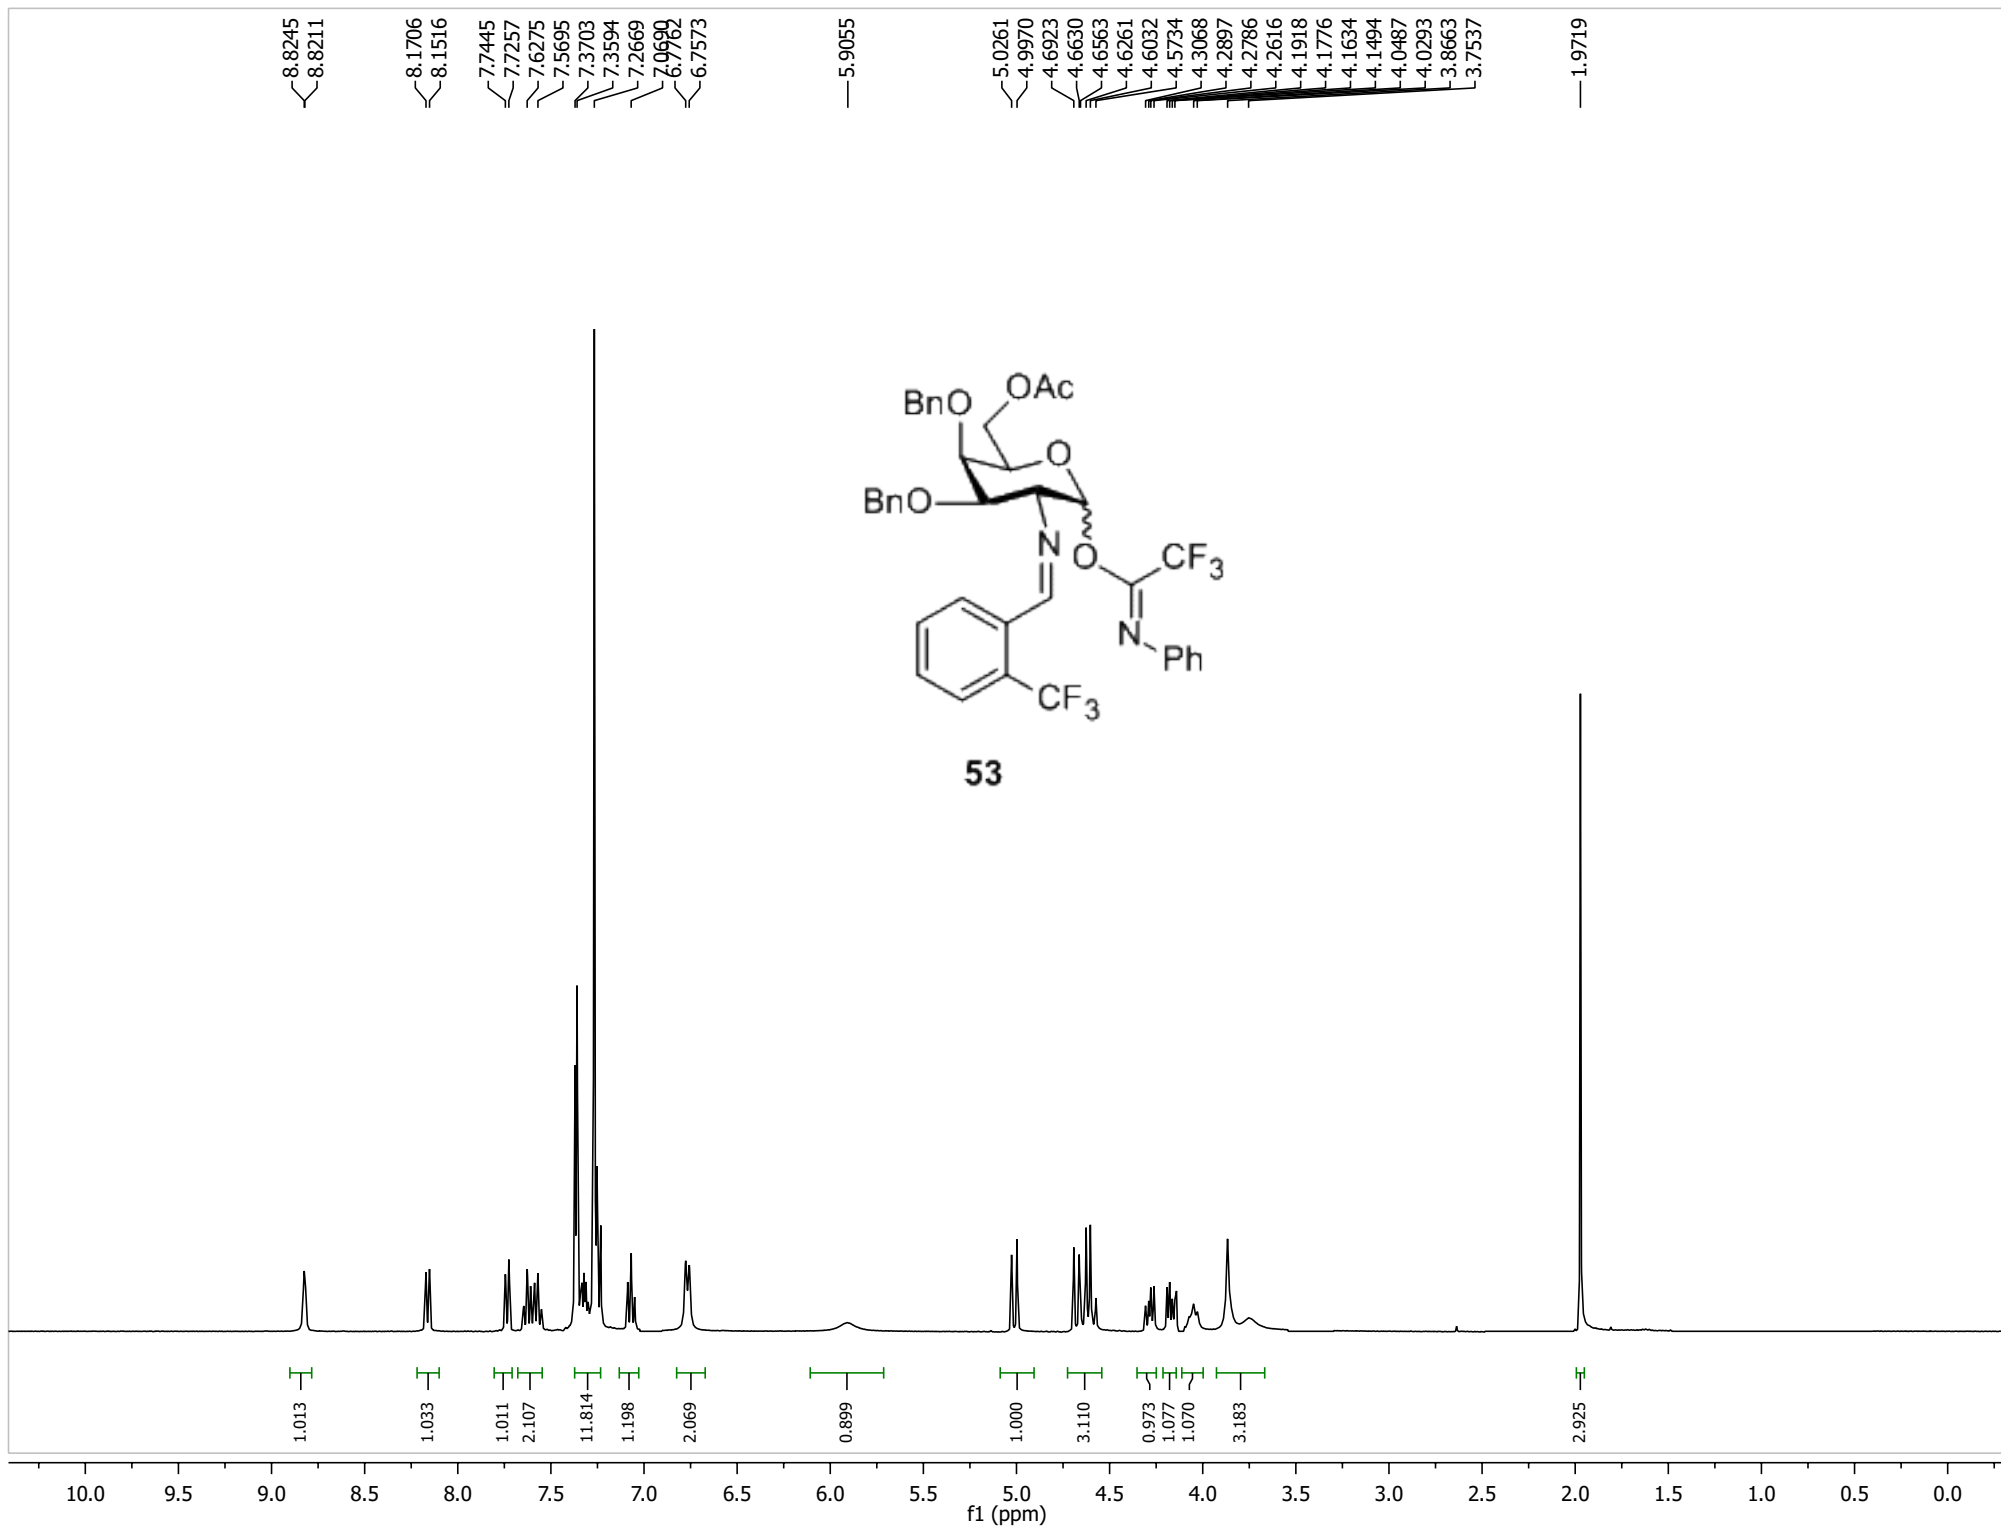

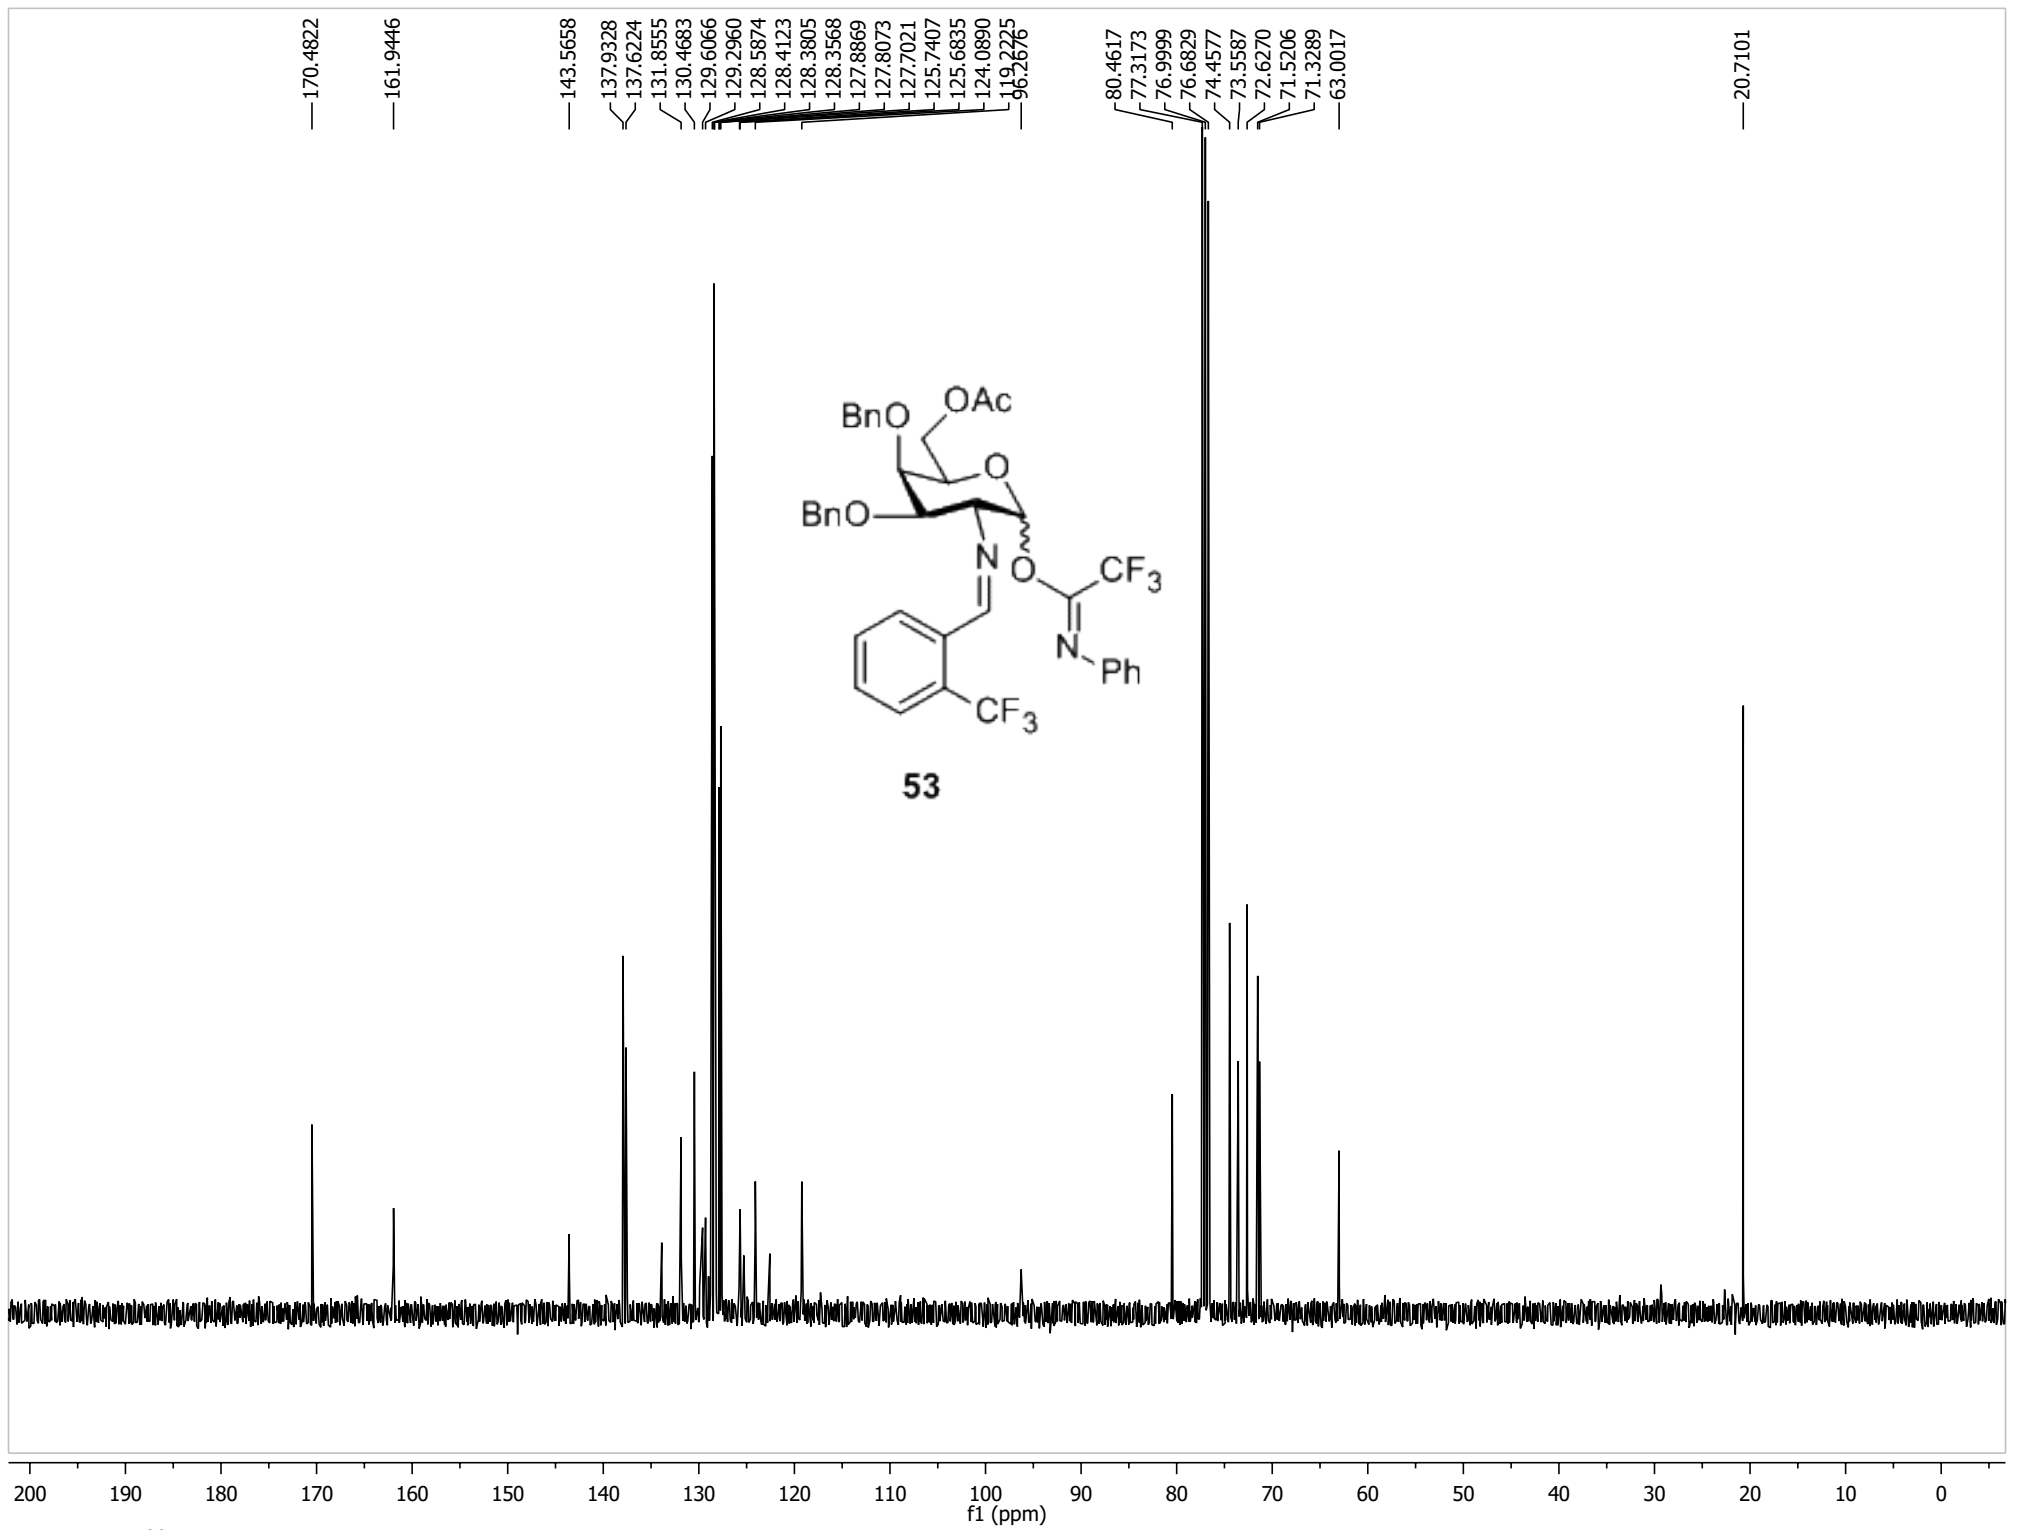

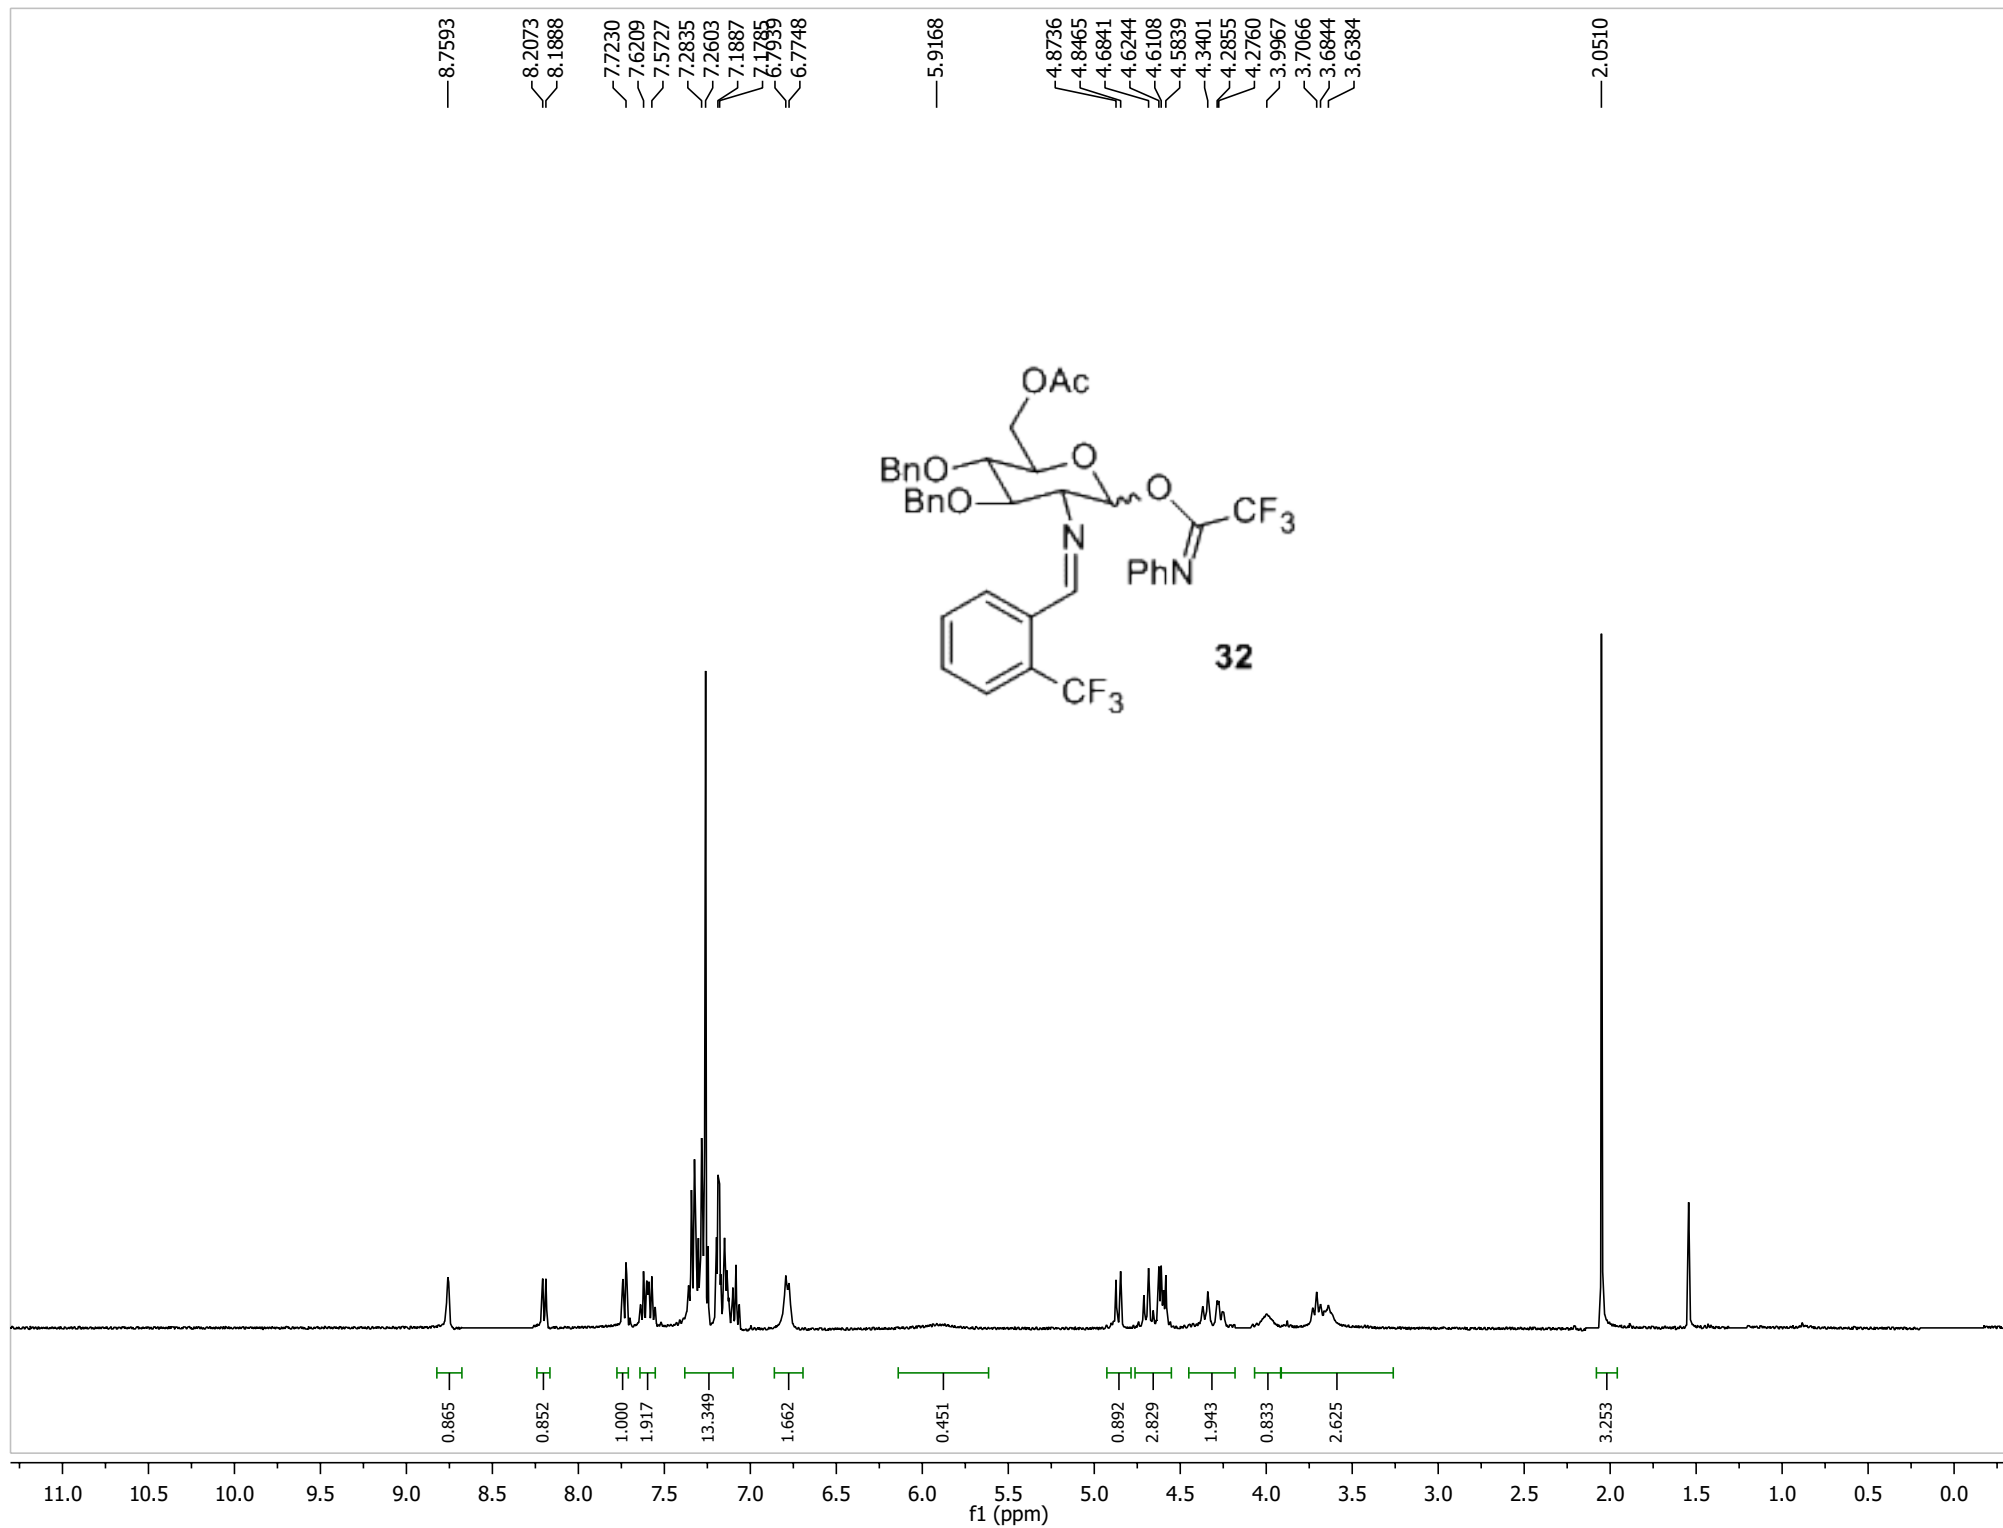

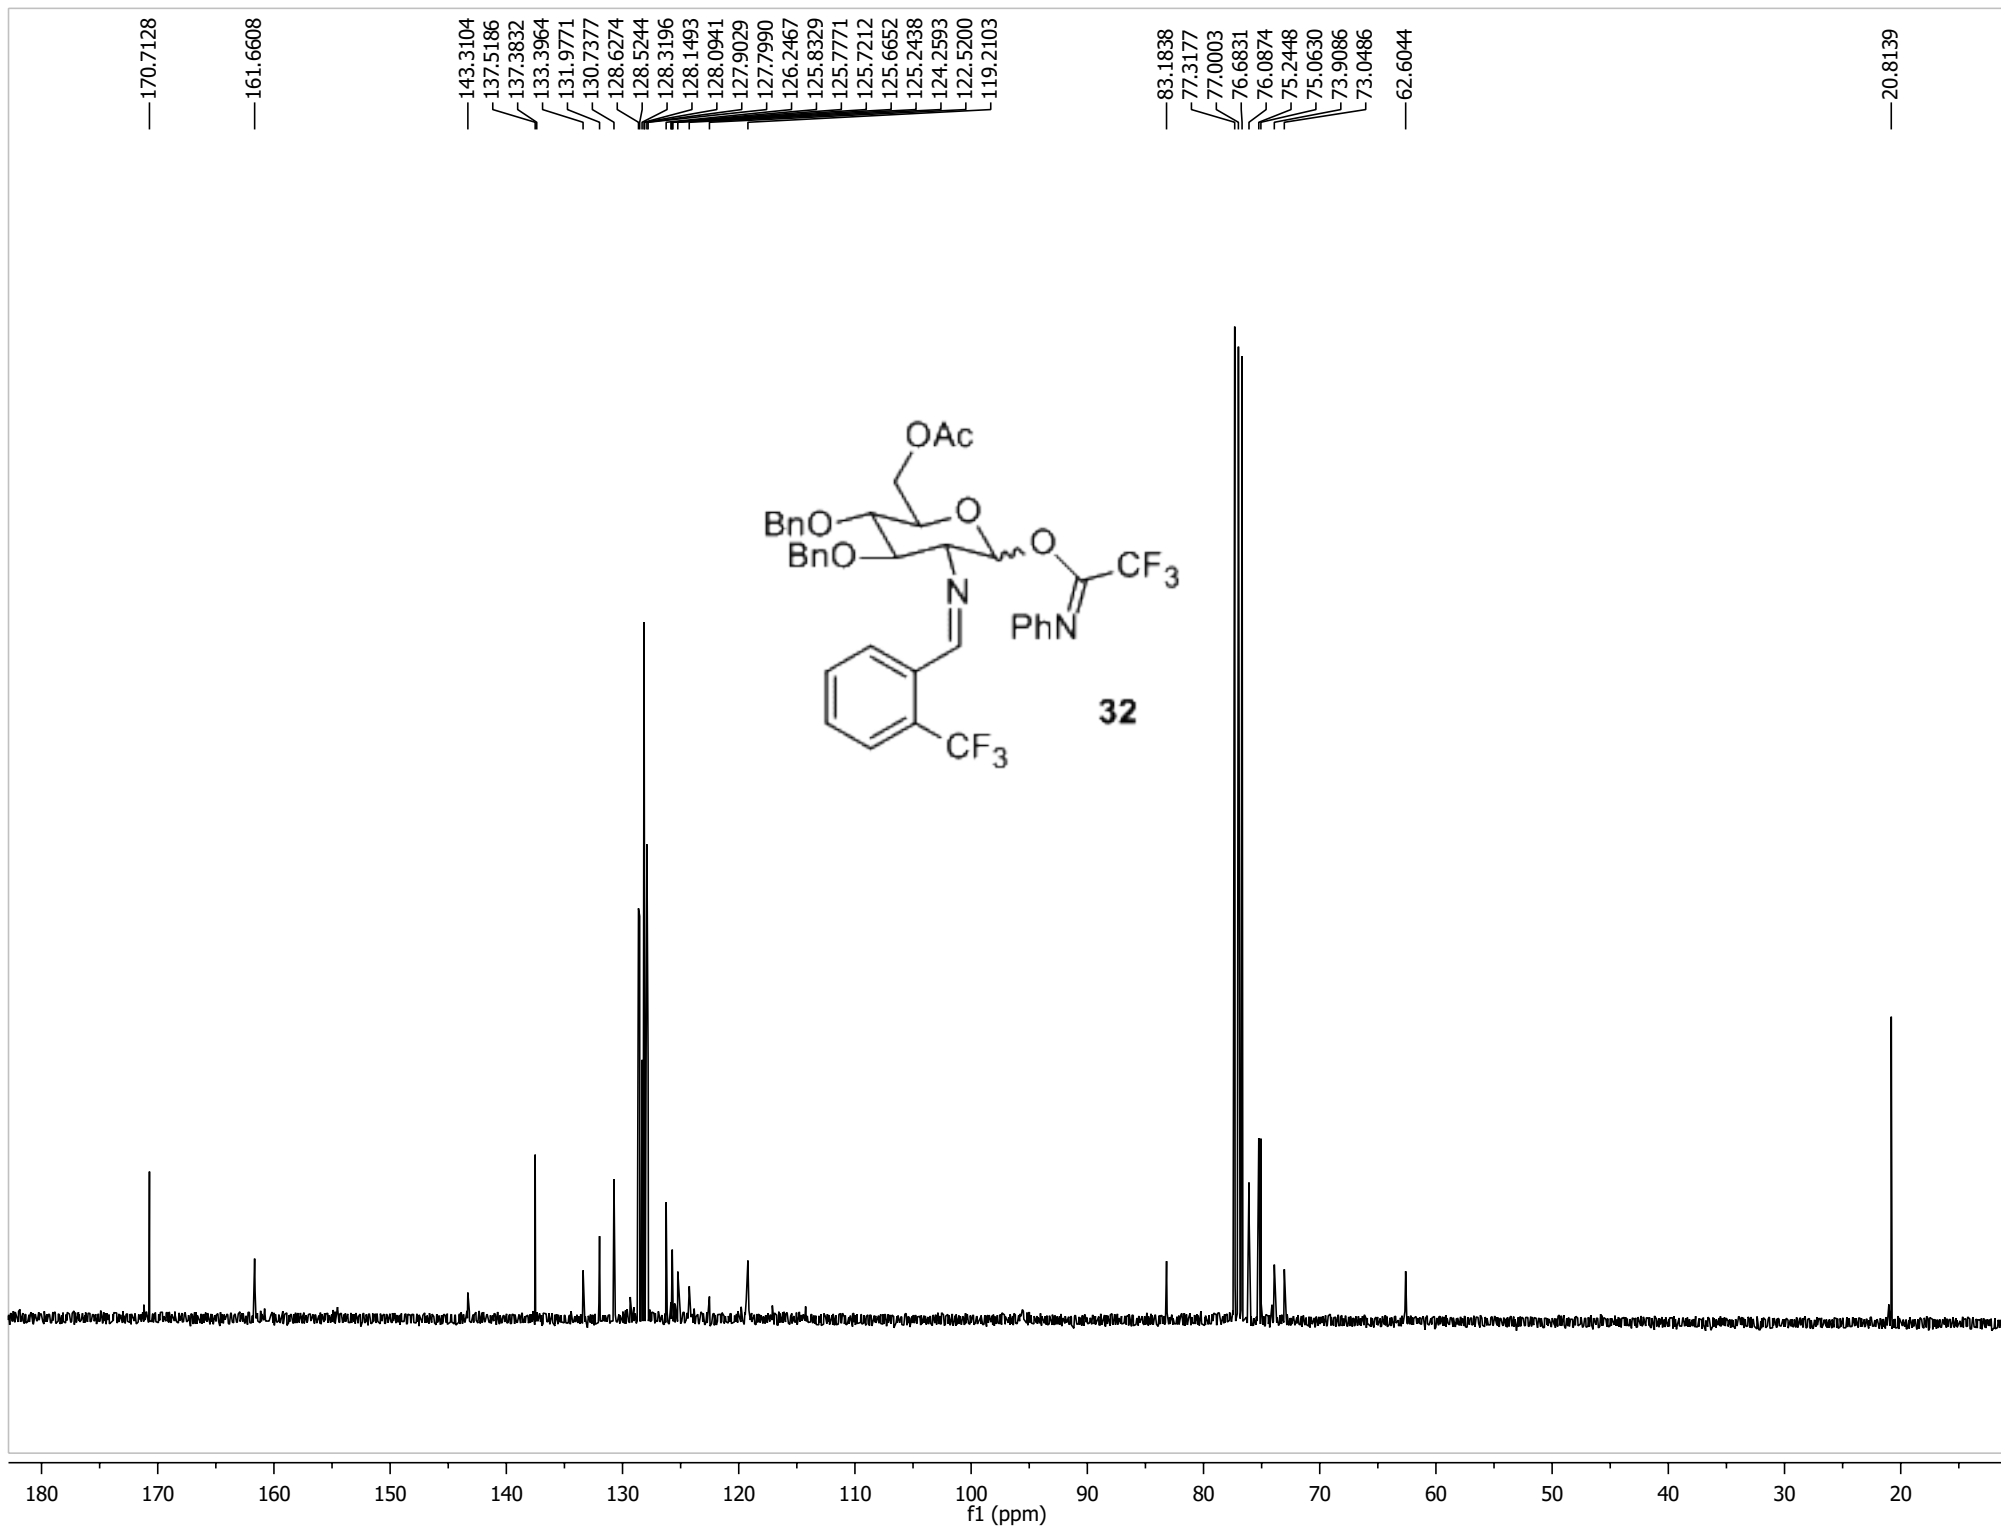

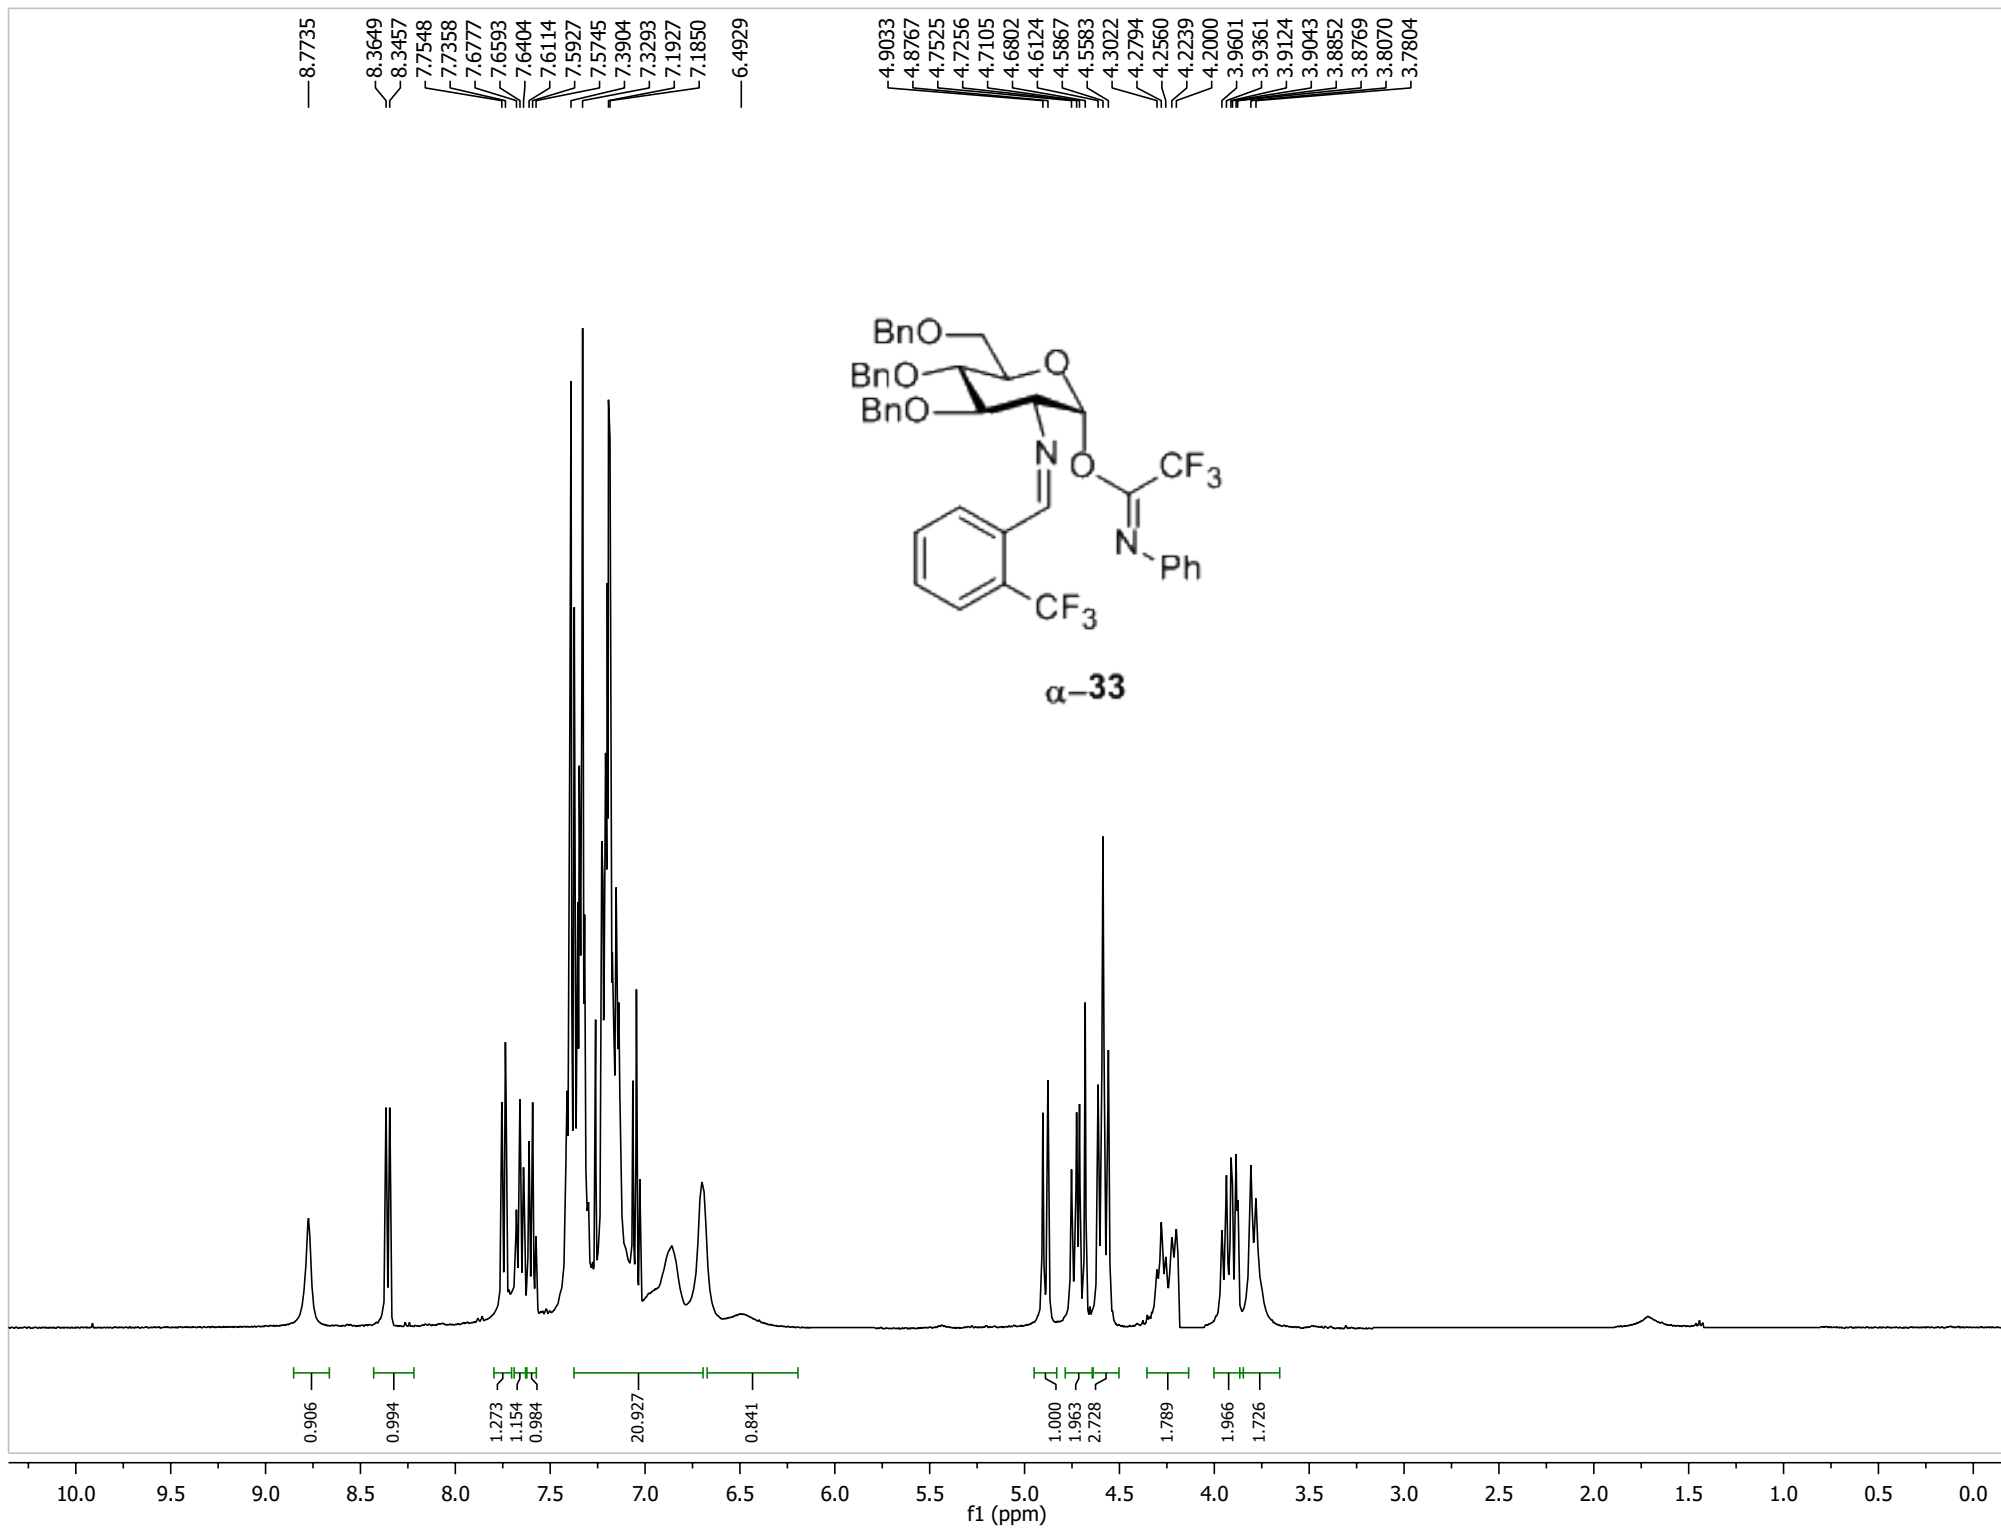

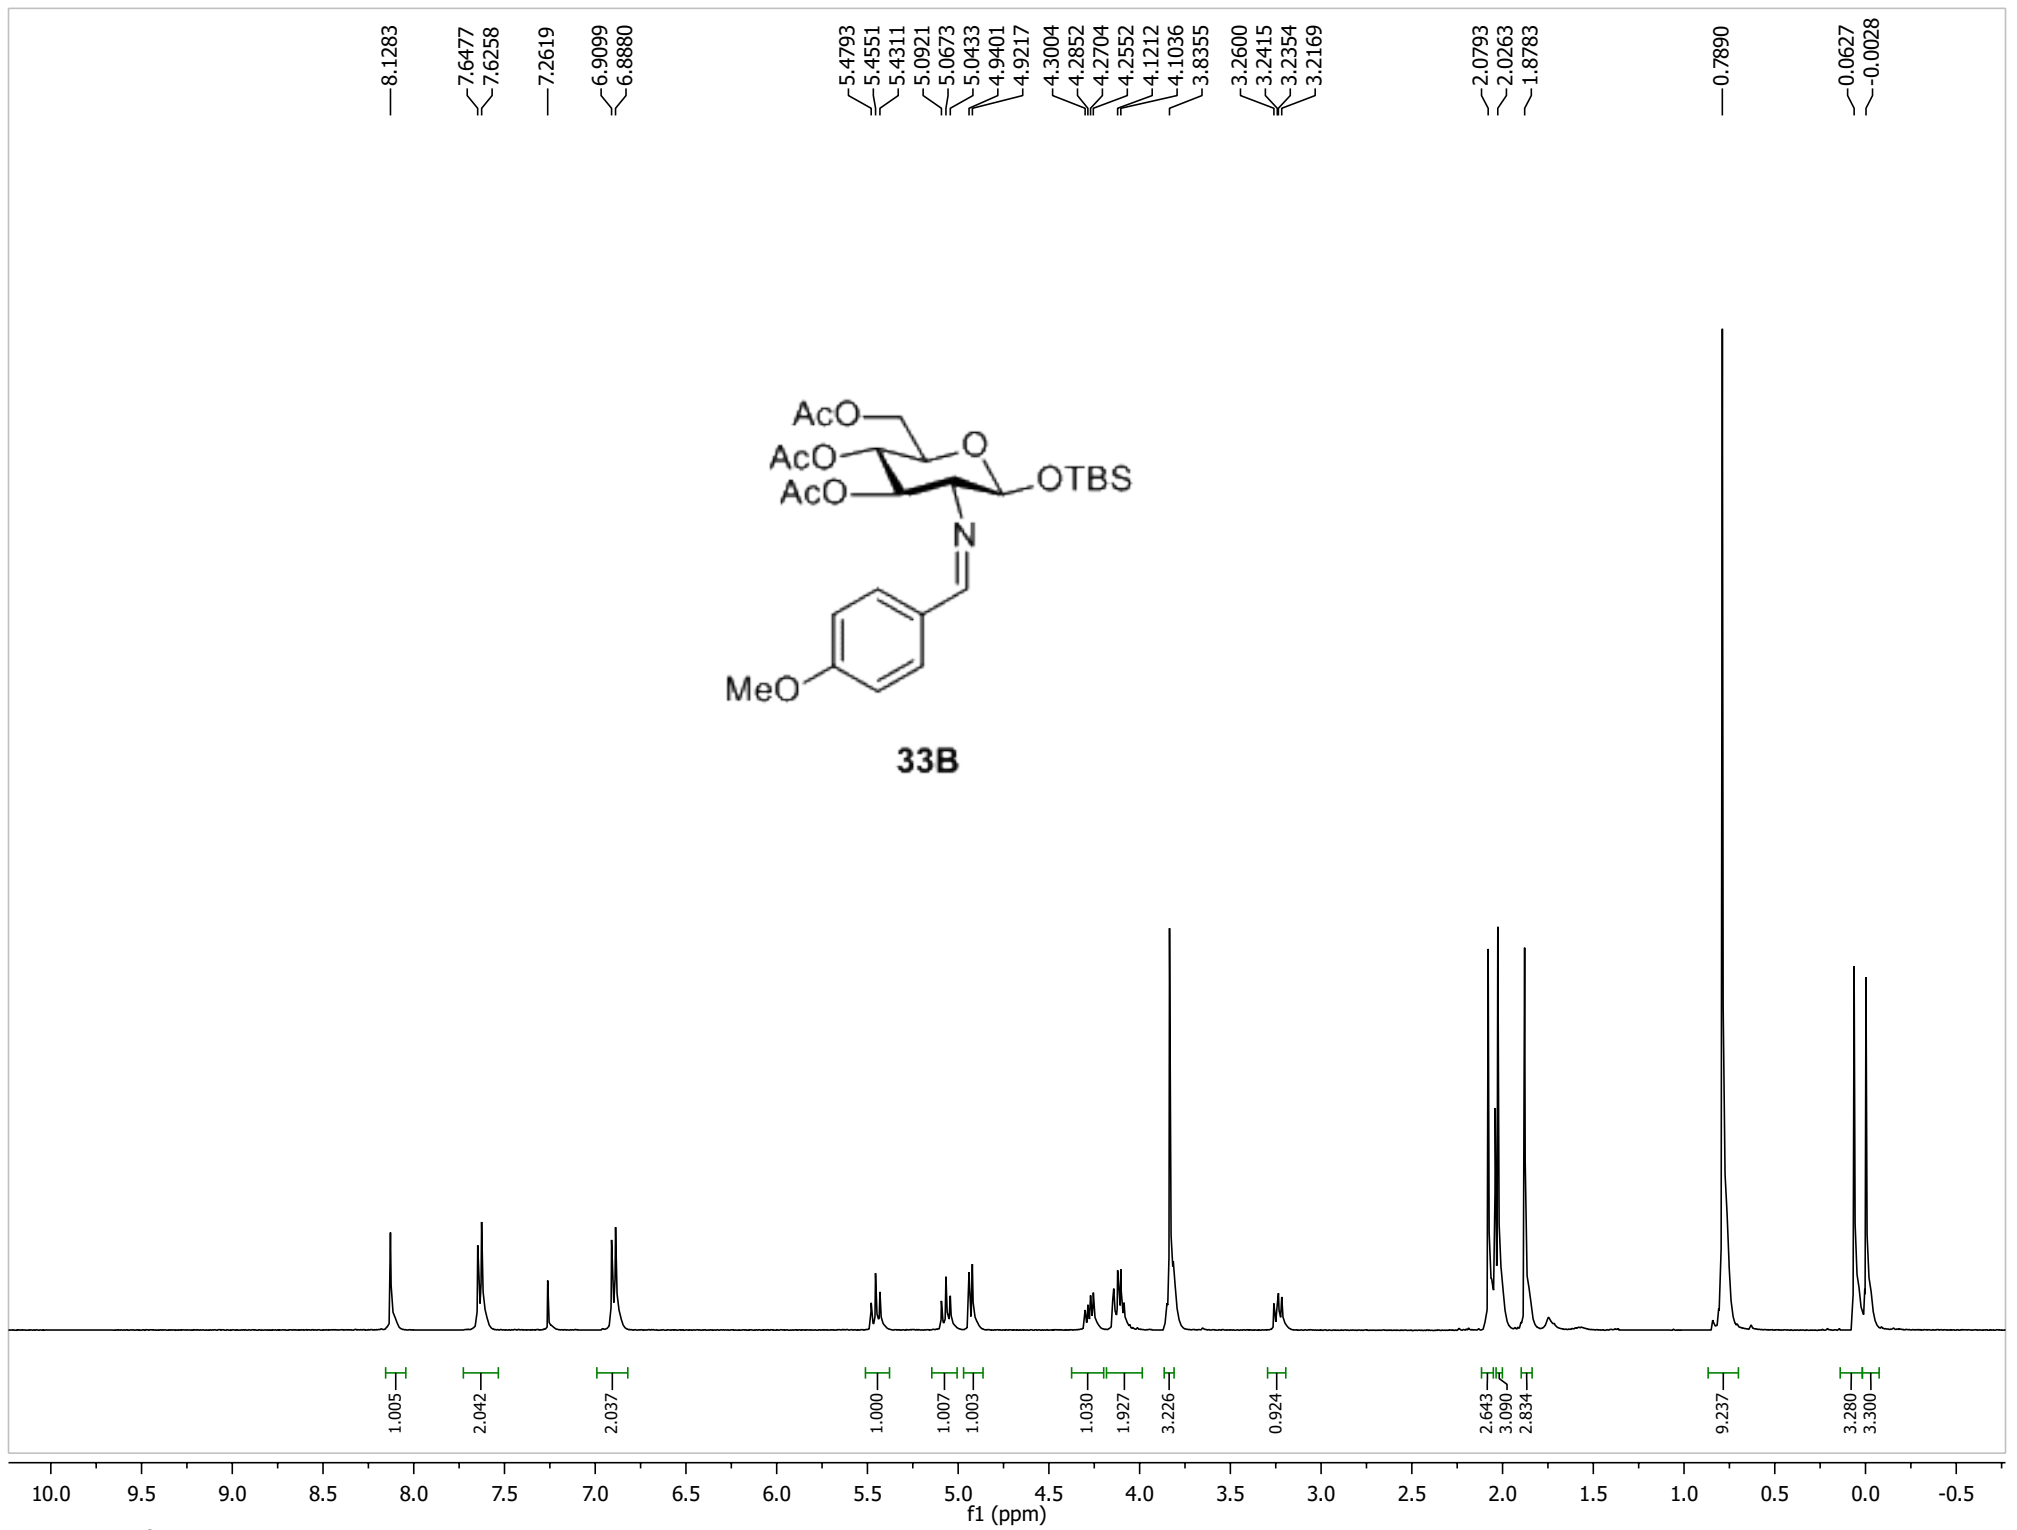



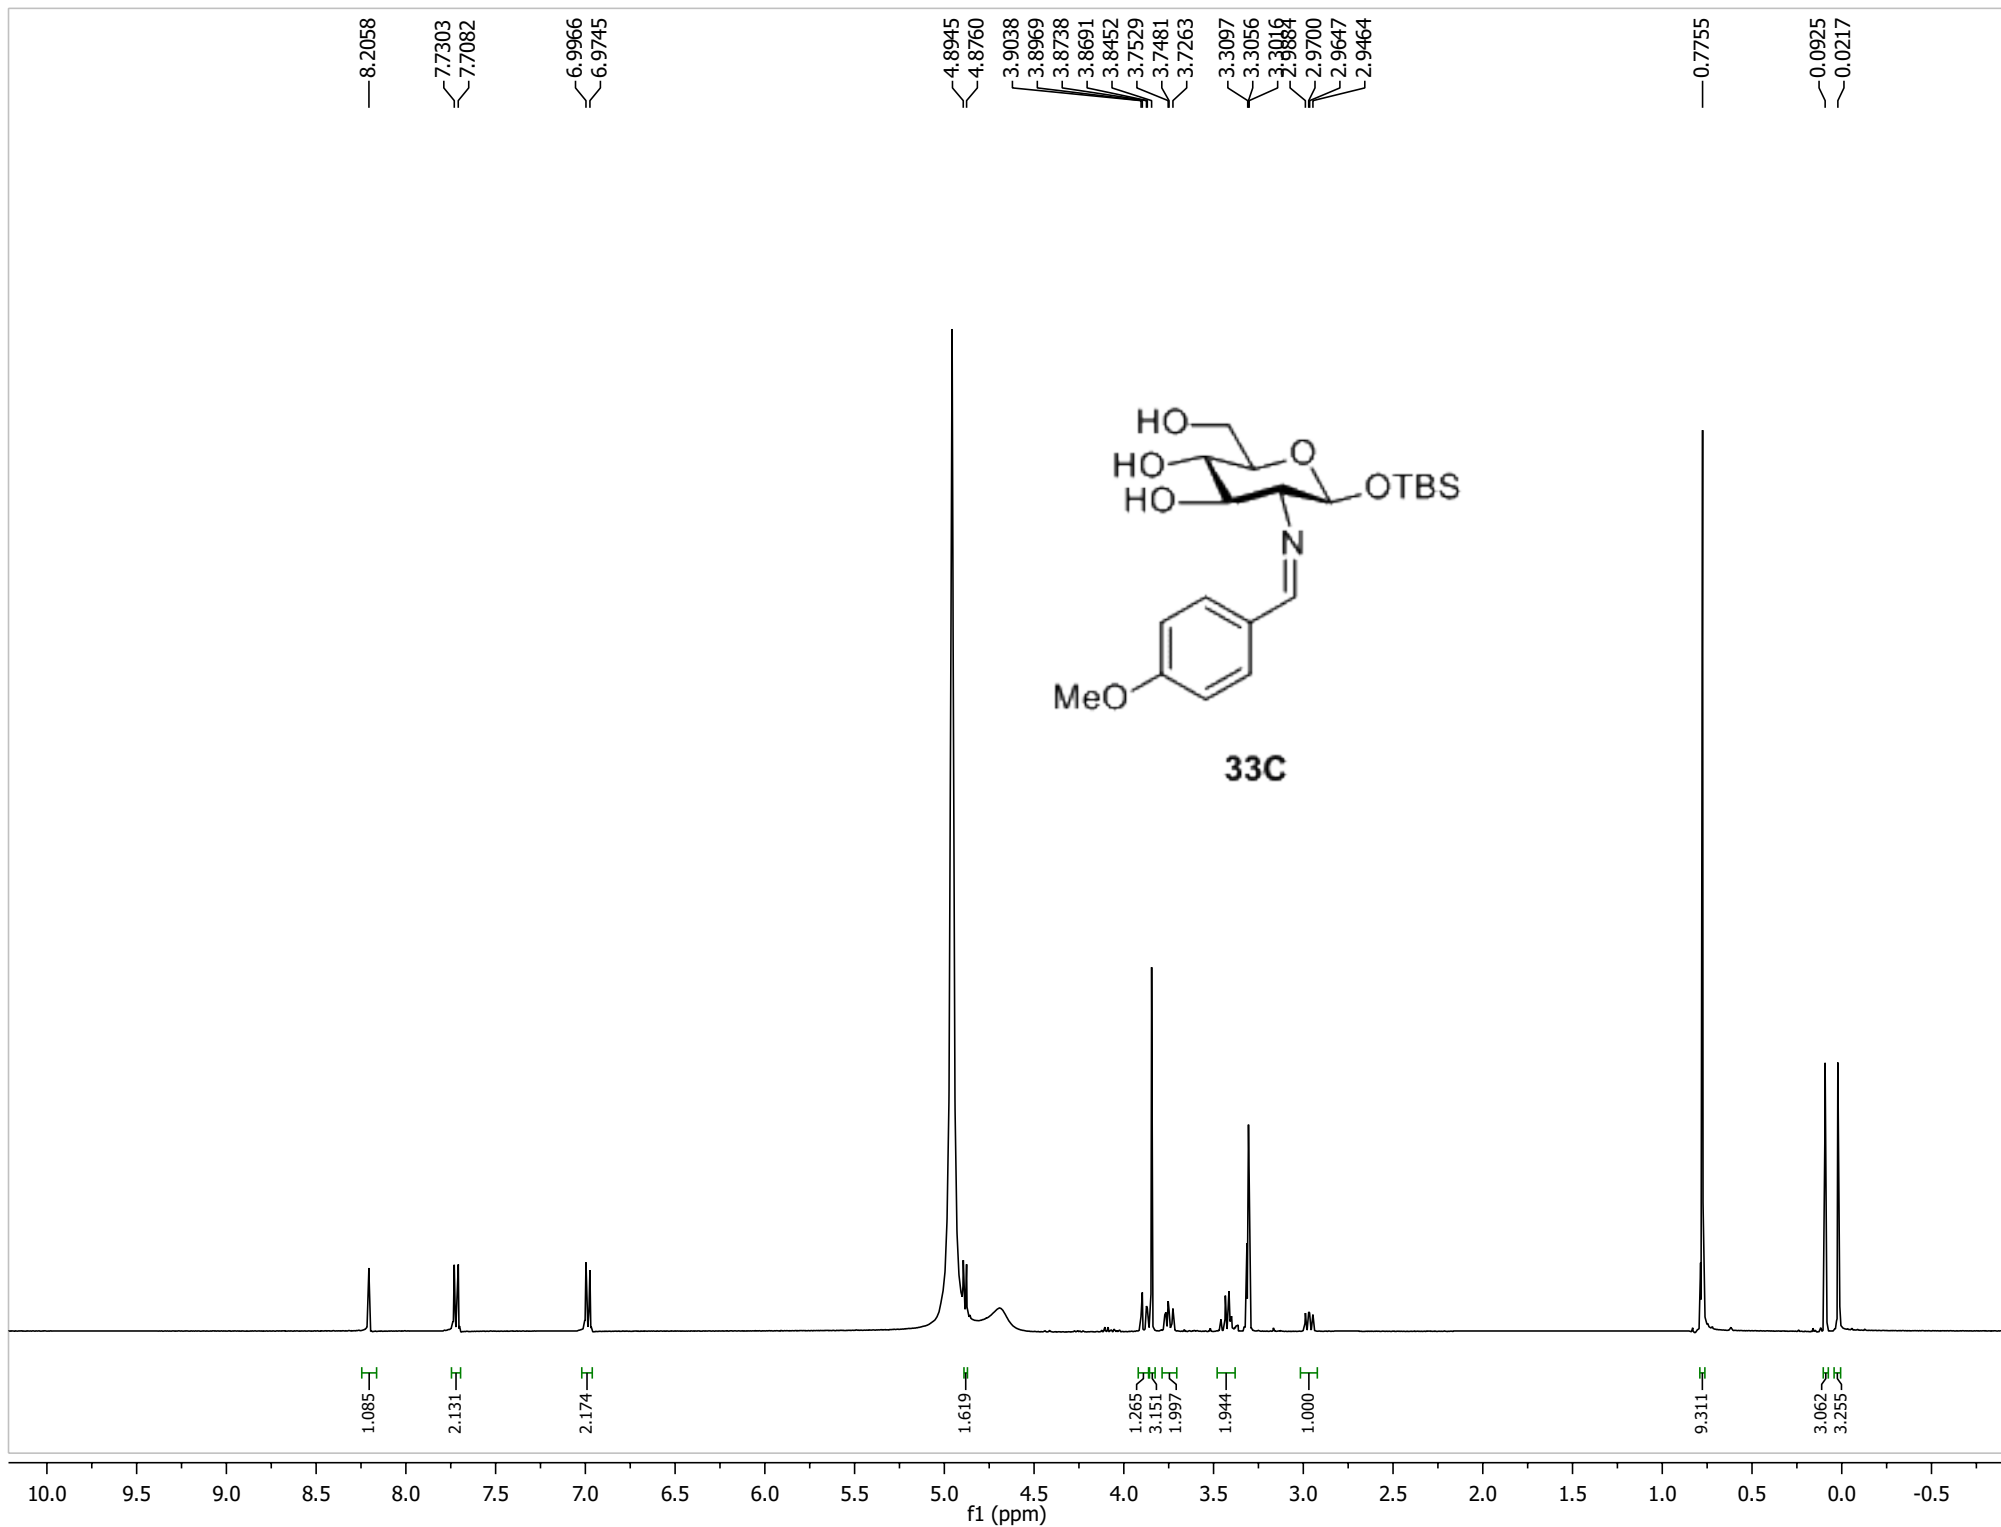

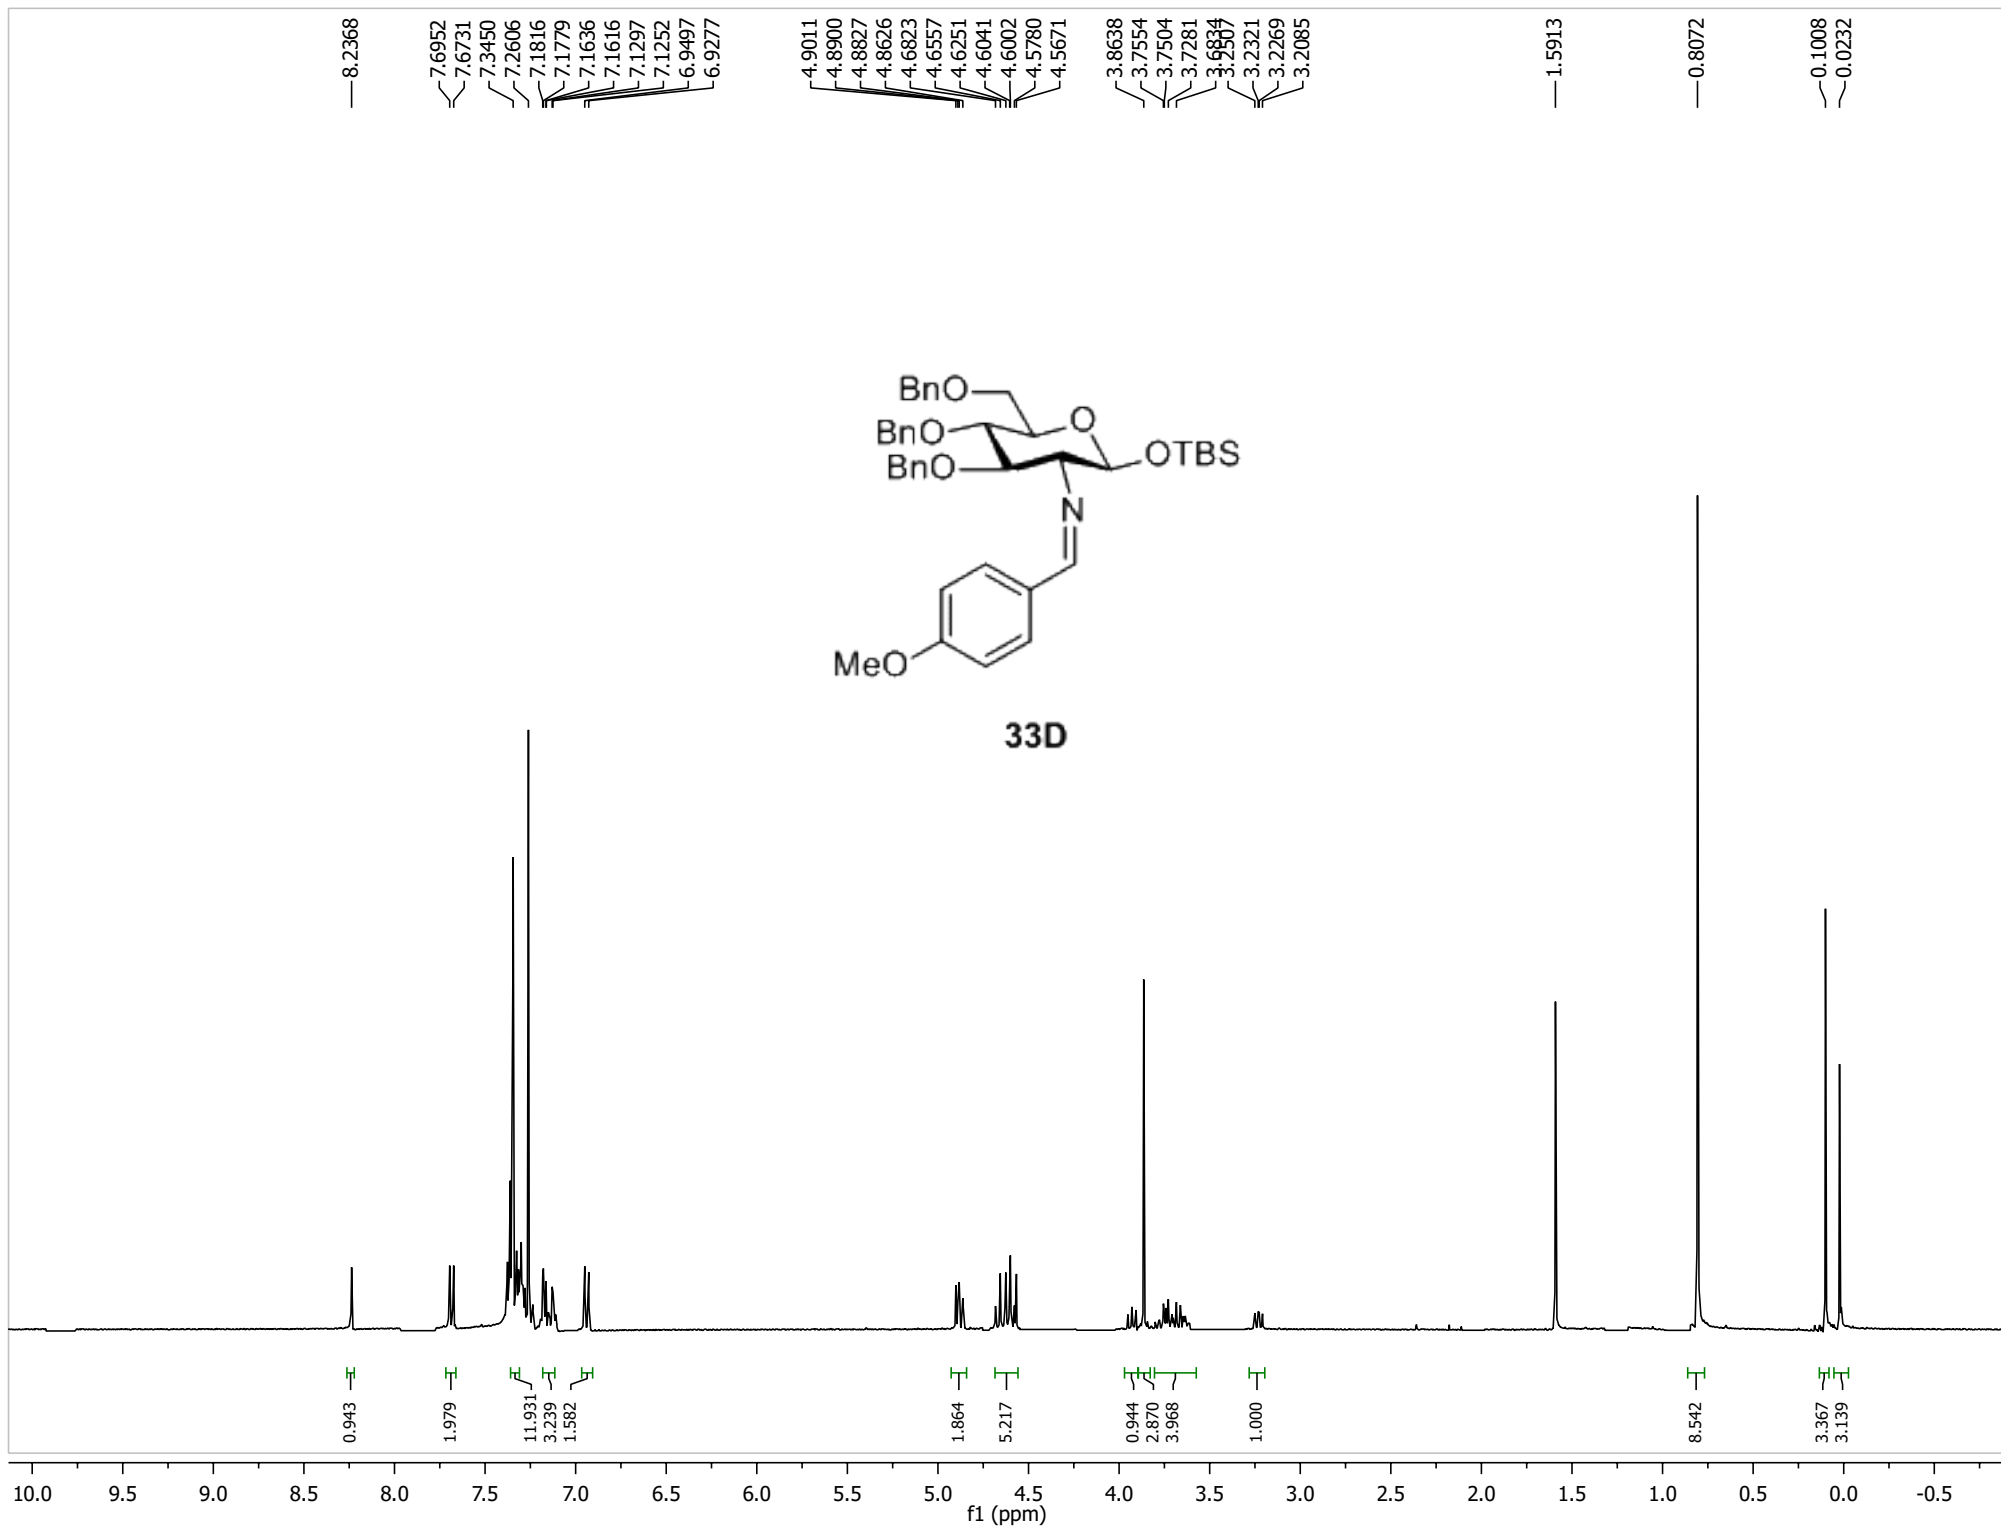

7.2361  
7.2258  
7.0076

5.3814

4.8484  
4.6294  
4.6030  
4.4941  
4.4461  
4.4197  
4.3959  
4.3664  
4.0528

3.6524  
3.6085  
3.5513

3.1151  
3.0976

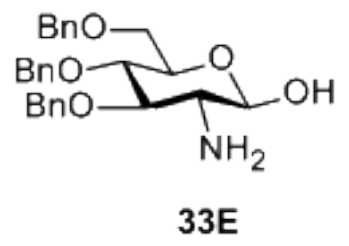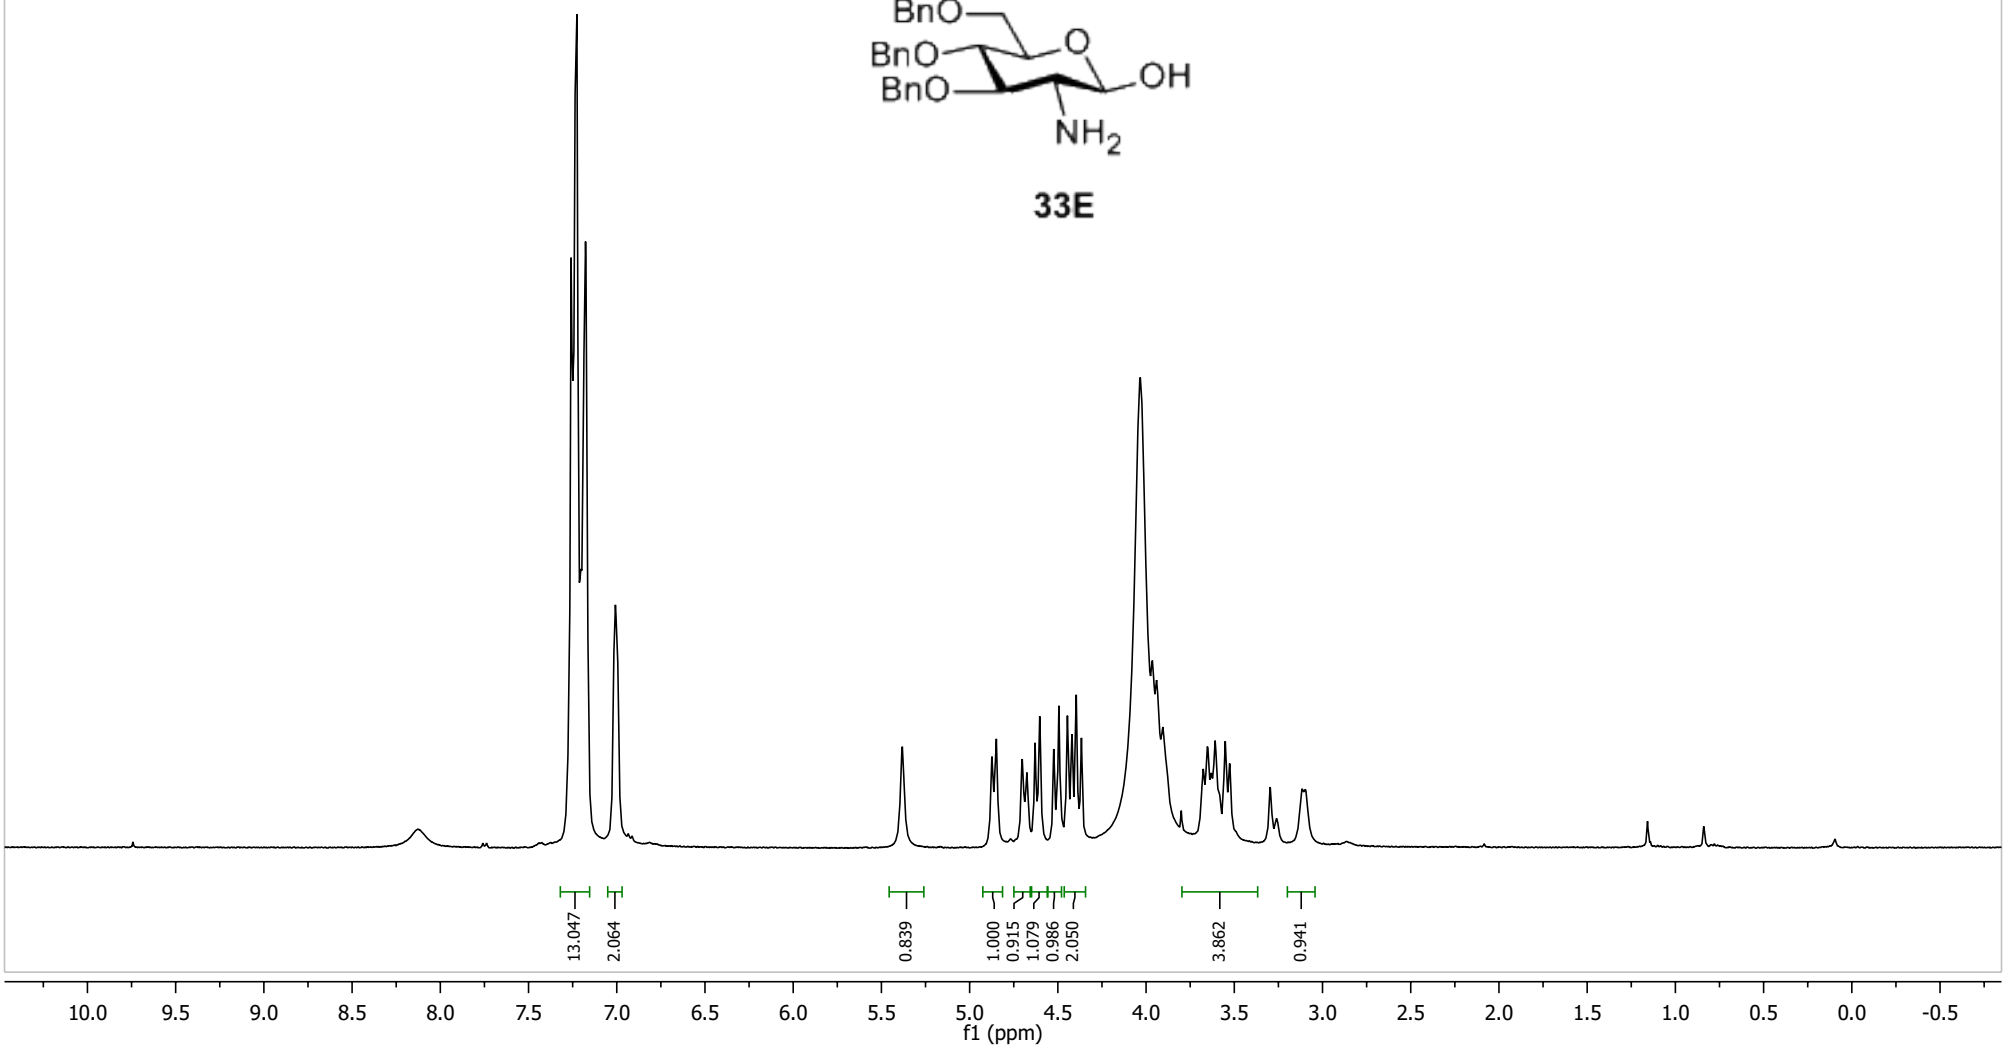

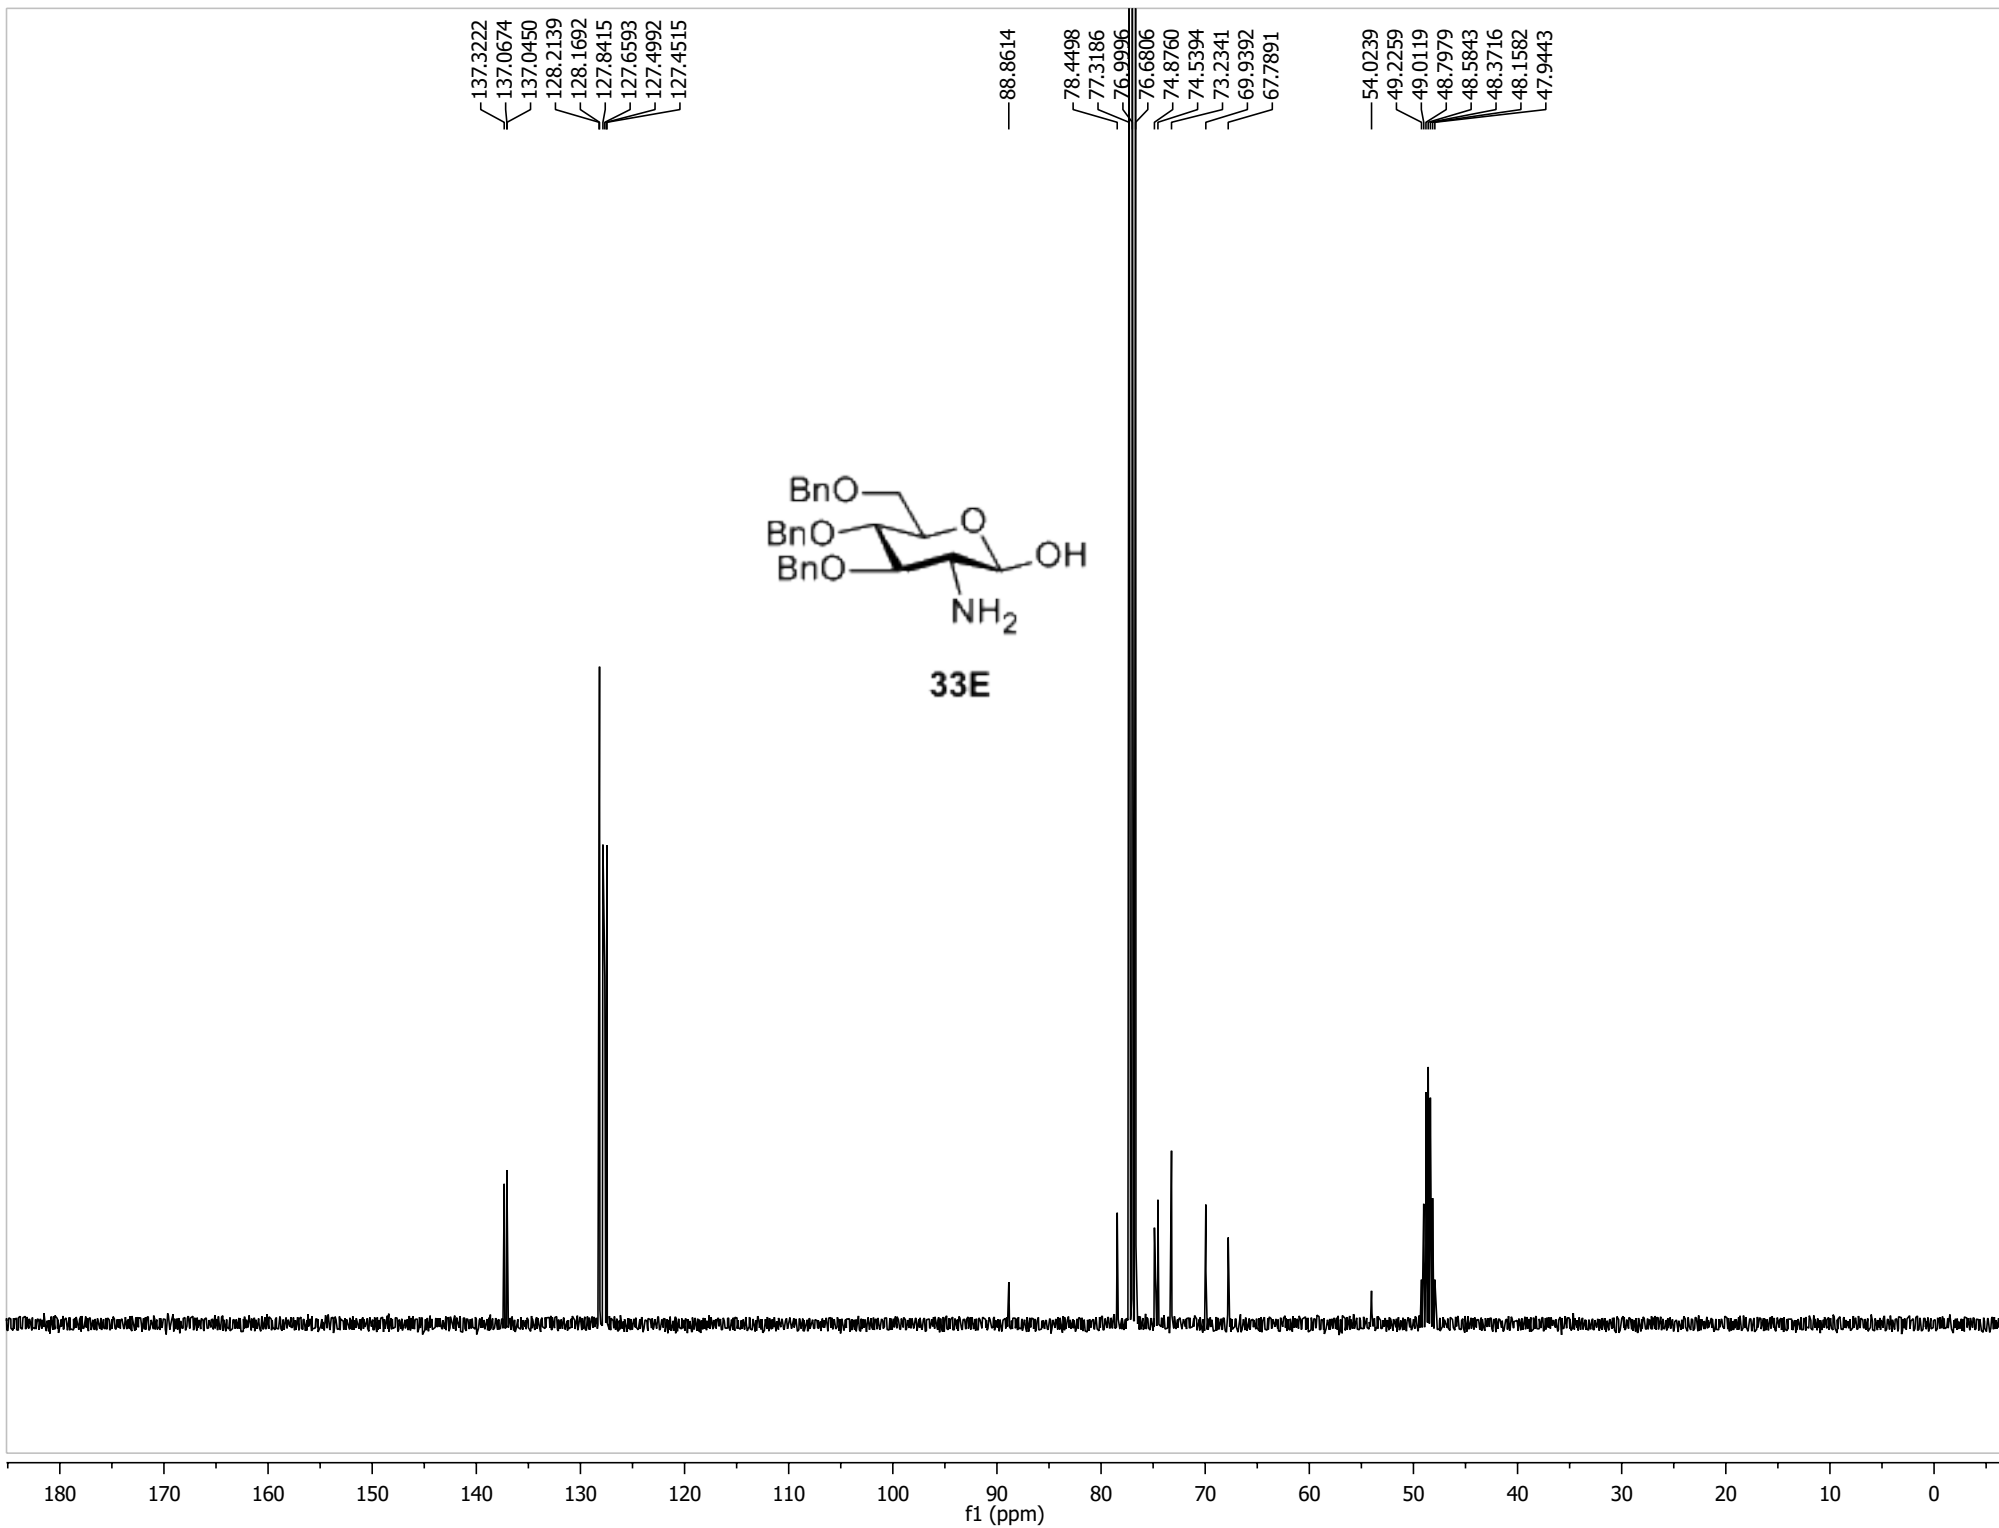

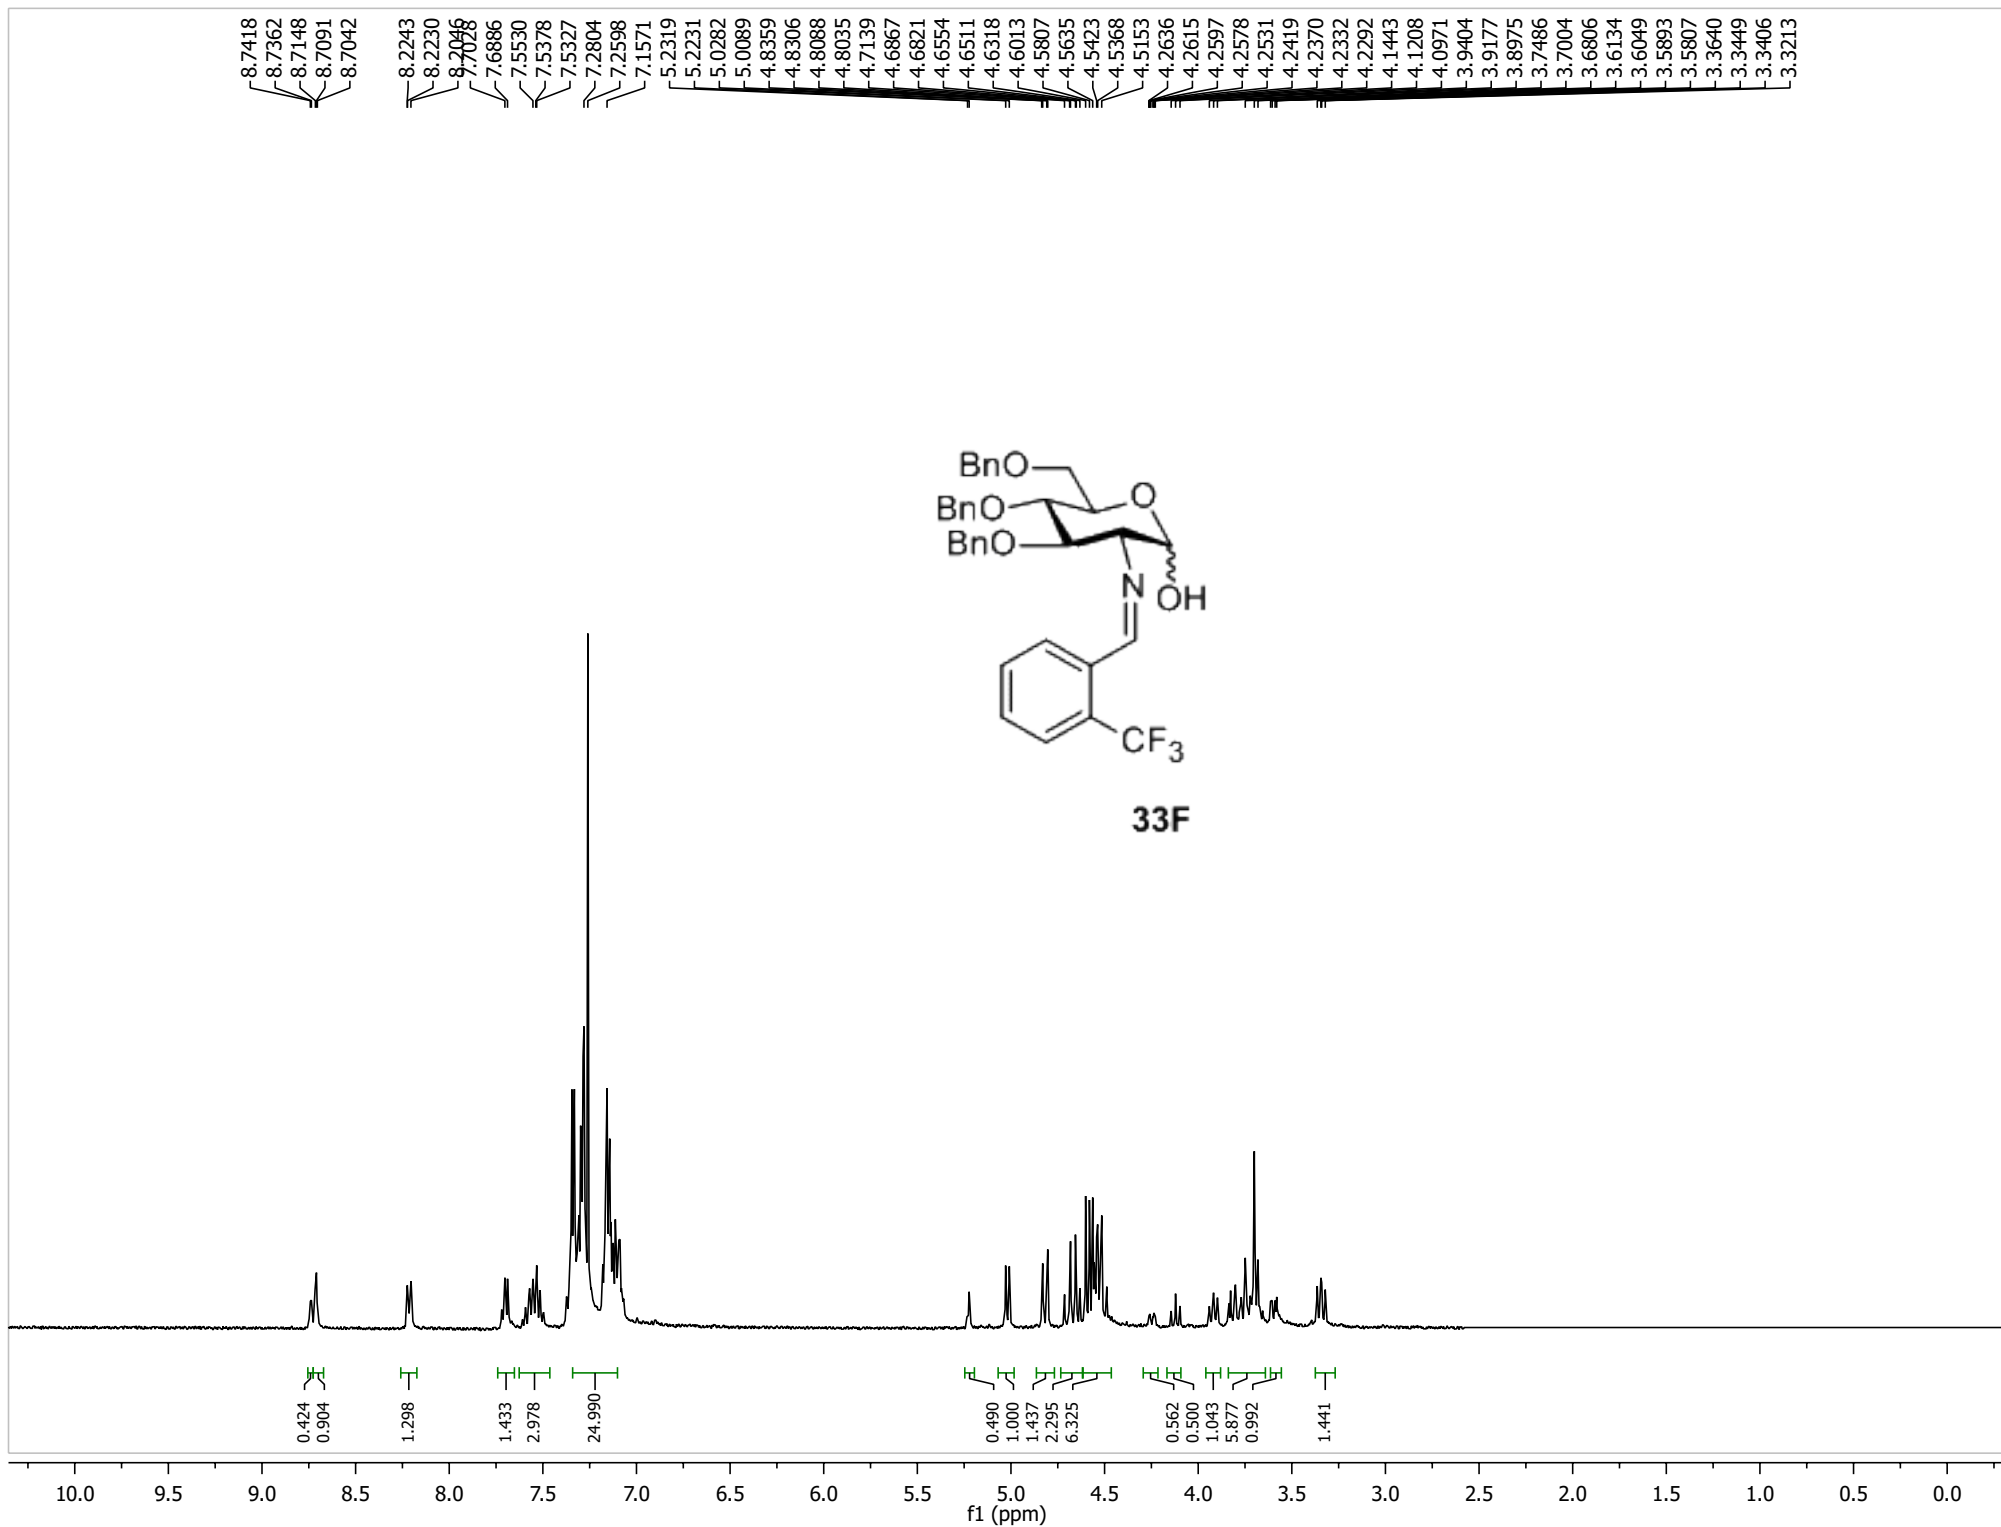

160.5692  
160.3811  
149.3212  
138.0971  
137.8890  
137.8692  
137.7550  
137.7148  
131.8017  
130.2869  
128.3154  
128.2902  
128.2664  
128.1454  
127.9005  
127.8546  
127.8230  
127.7810  
127.6986  
127.6109  
127.5586  
127.5428  
127.4942  
125.5317  
123.7215  
95.3673  
93.5834  
83.1712  
80.1636  
78.1505  
77.8544  
77.8214  
77.3180  
77.0000  
76.6820  
75.4741  
75.1623  
75.0989  
74.9169  
74.8603  
74.7907  
73.3477  
73.2832  
68.8772  
68.5868

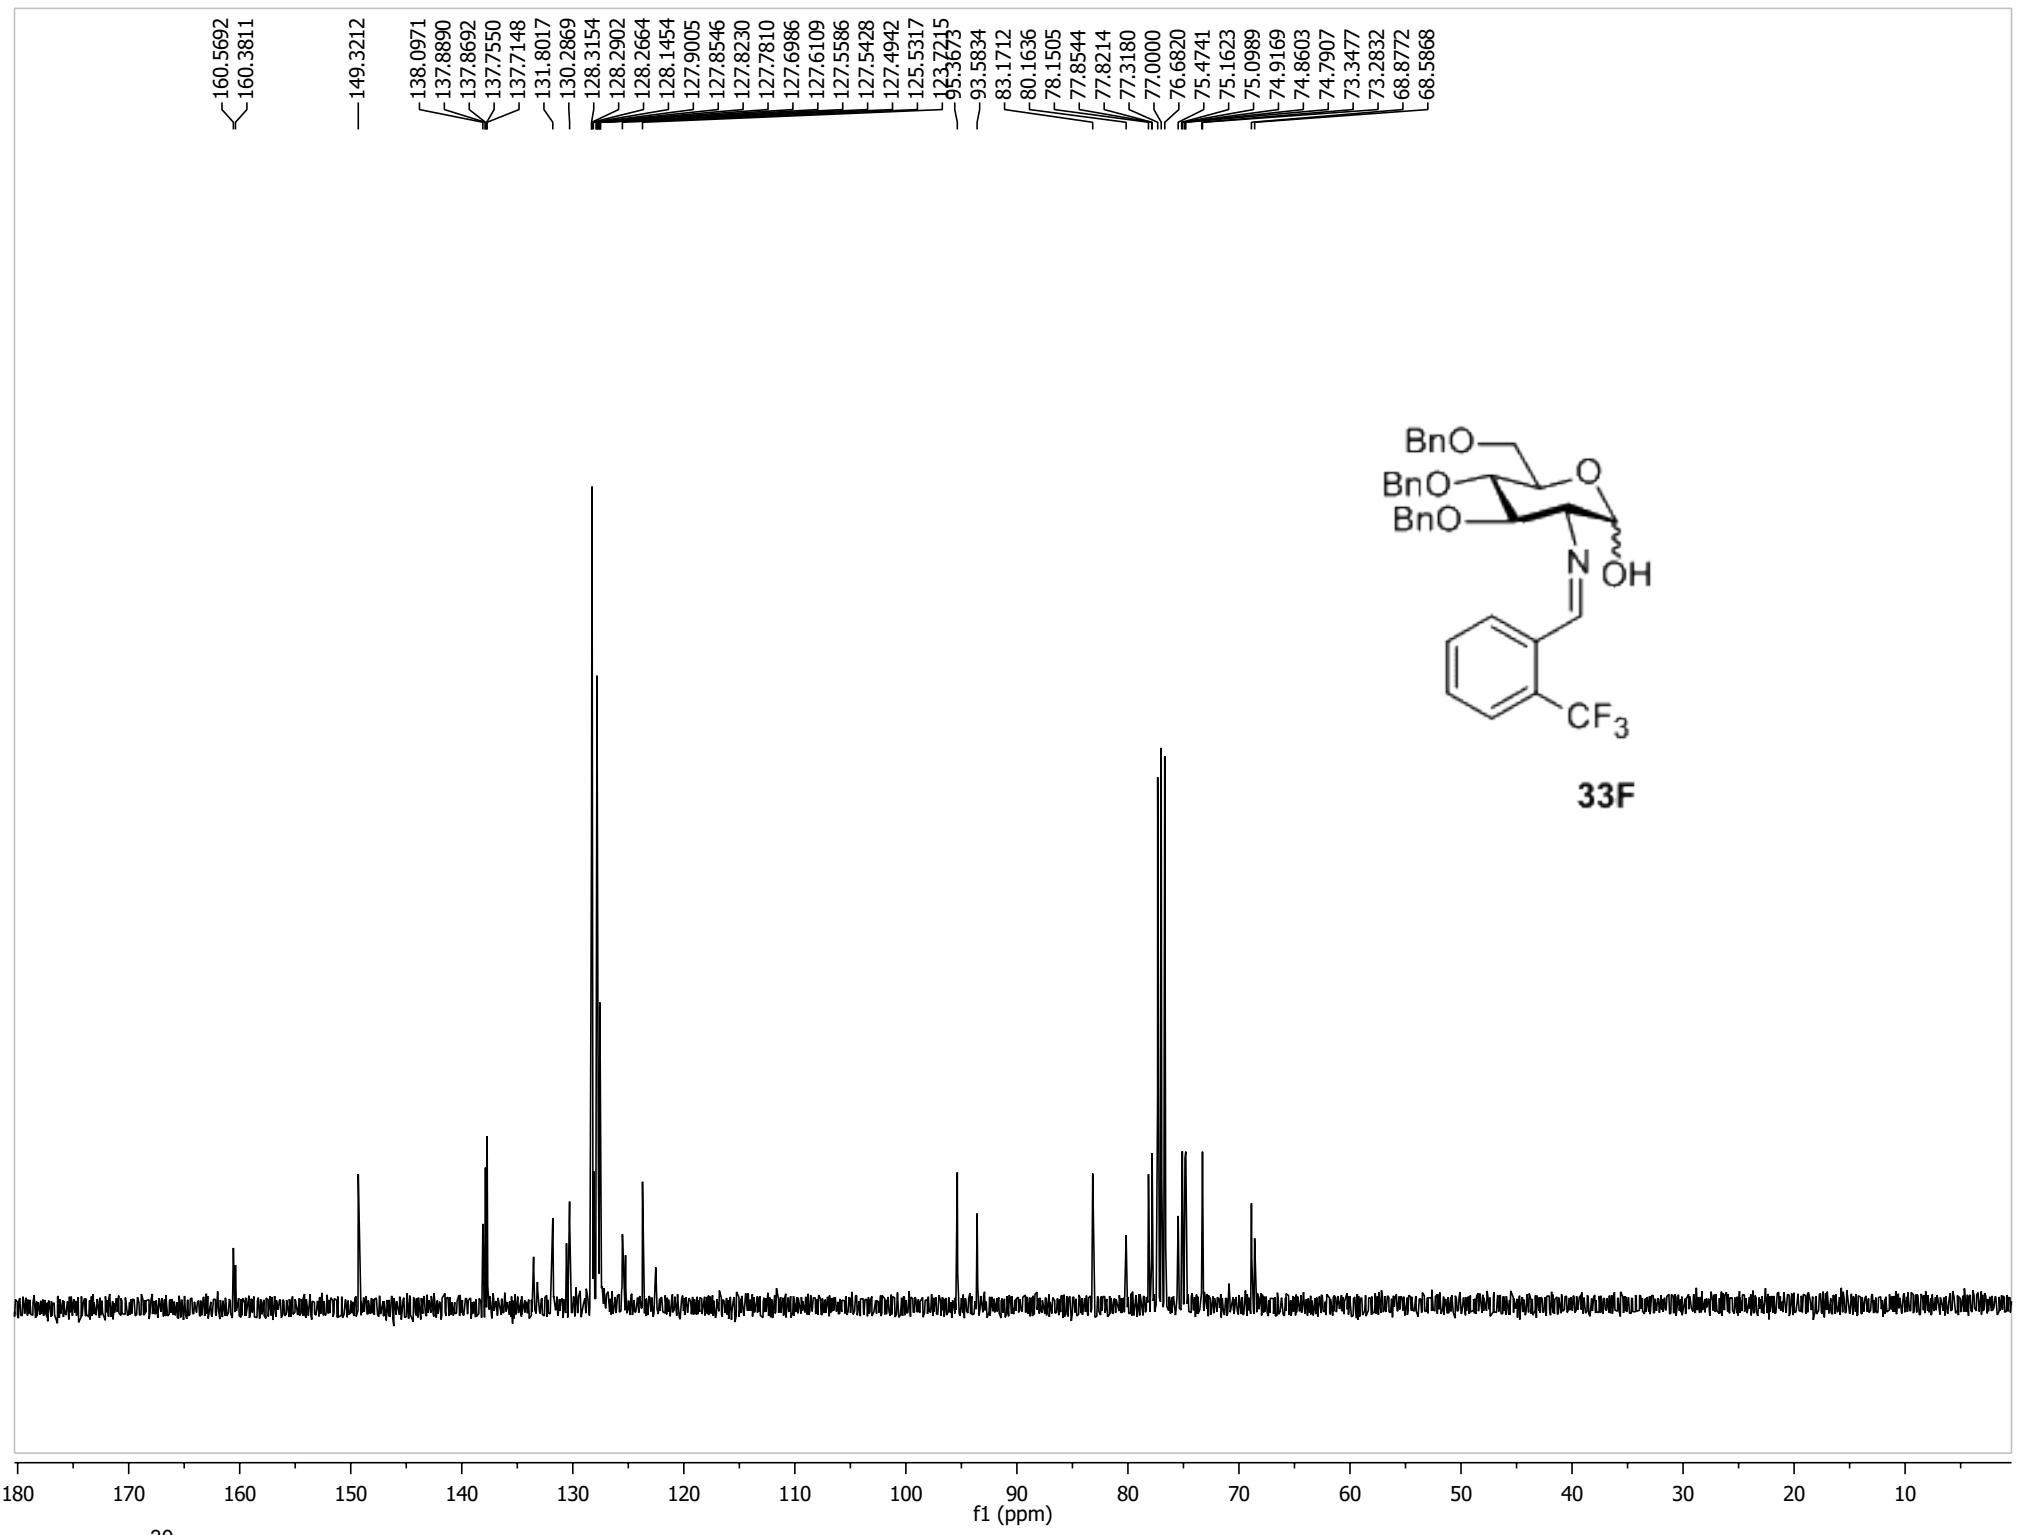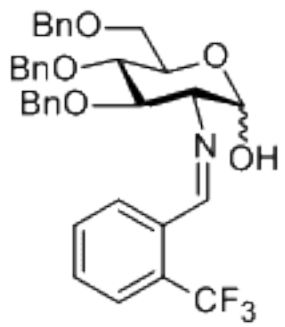

33F



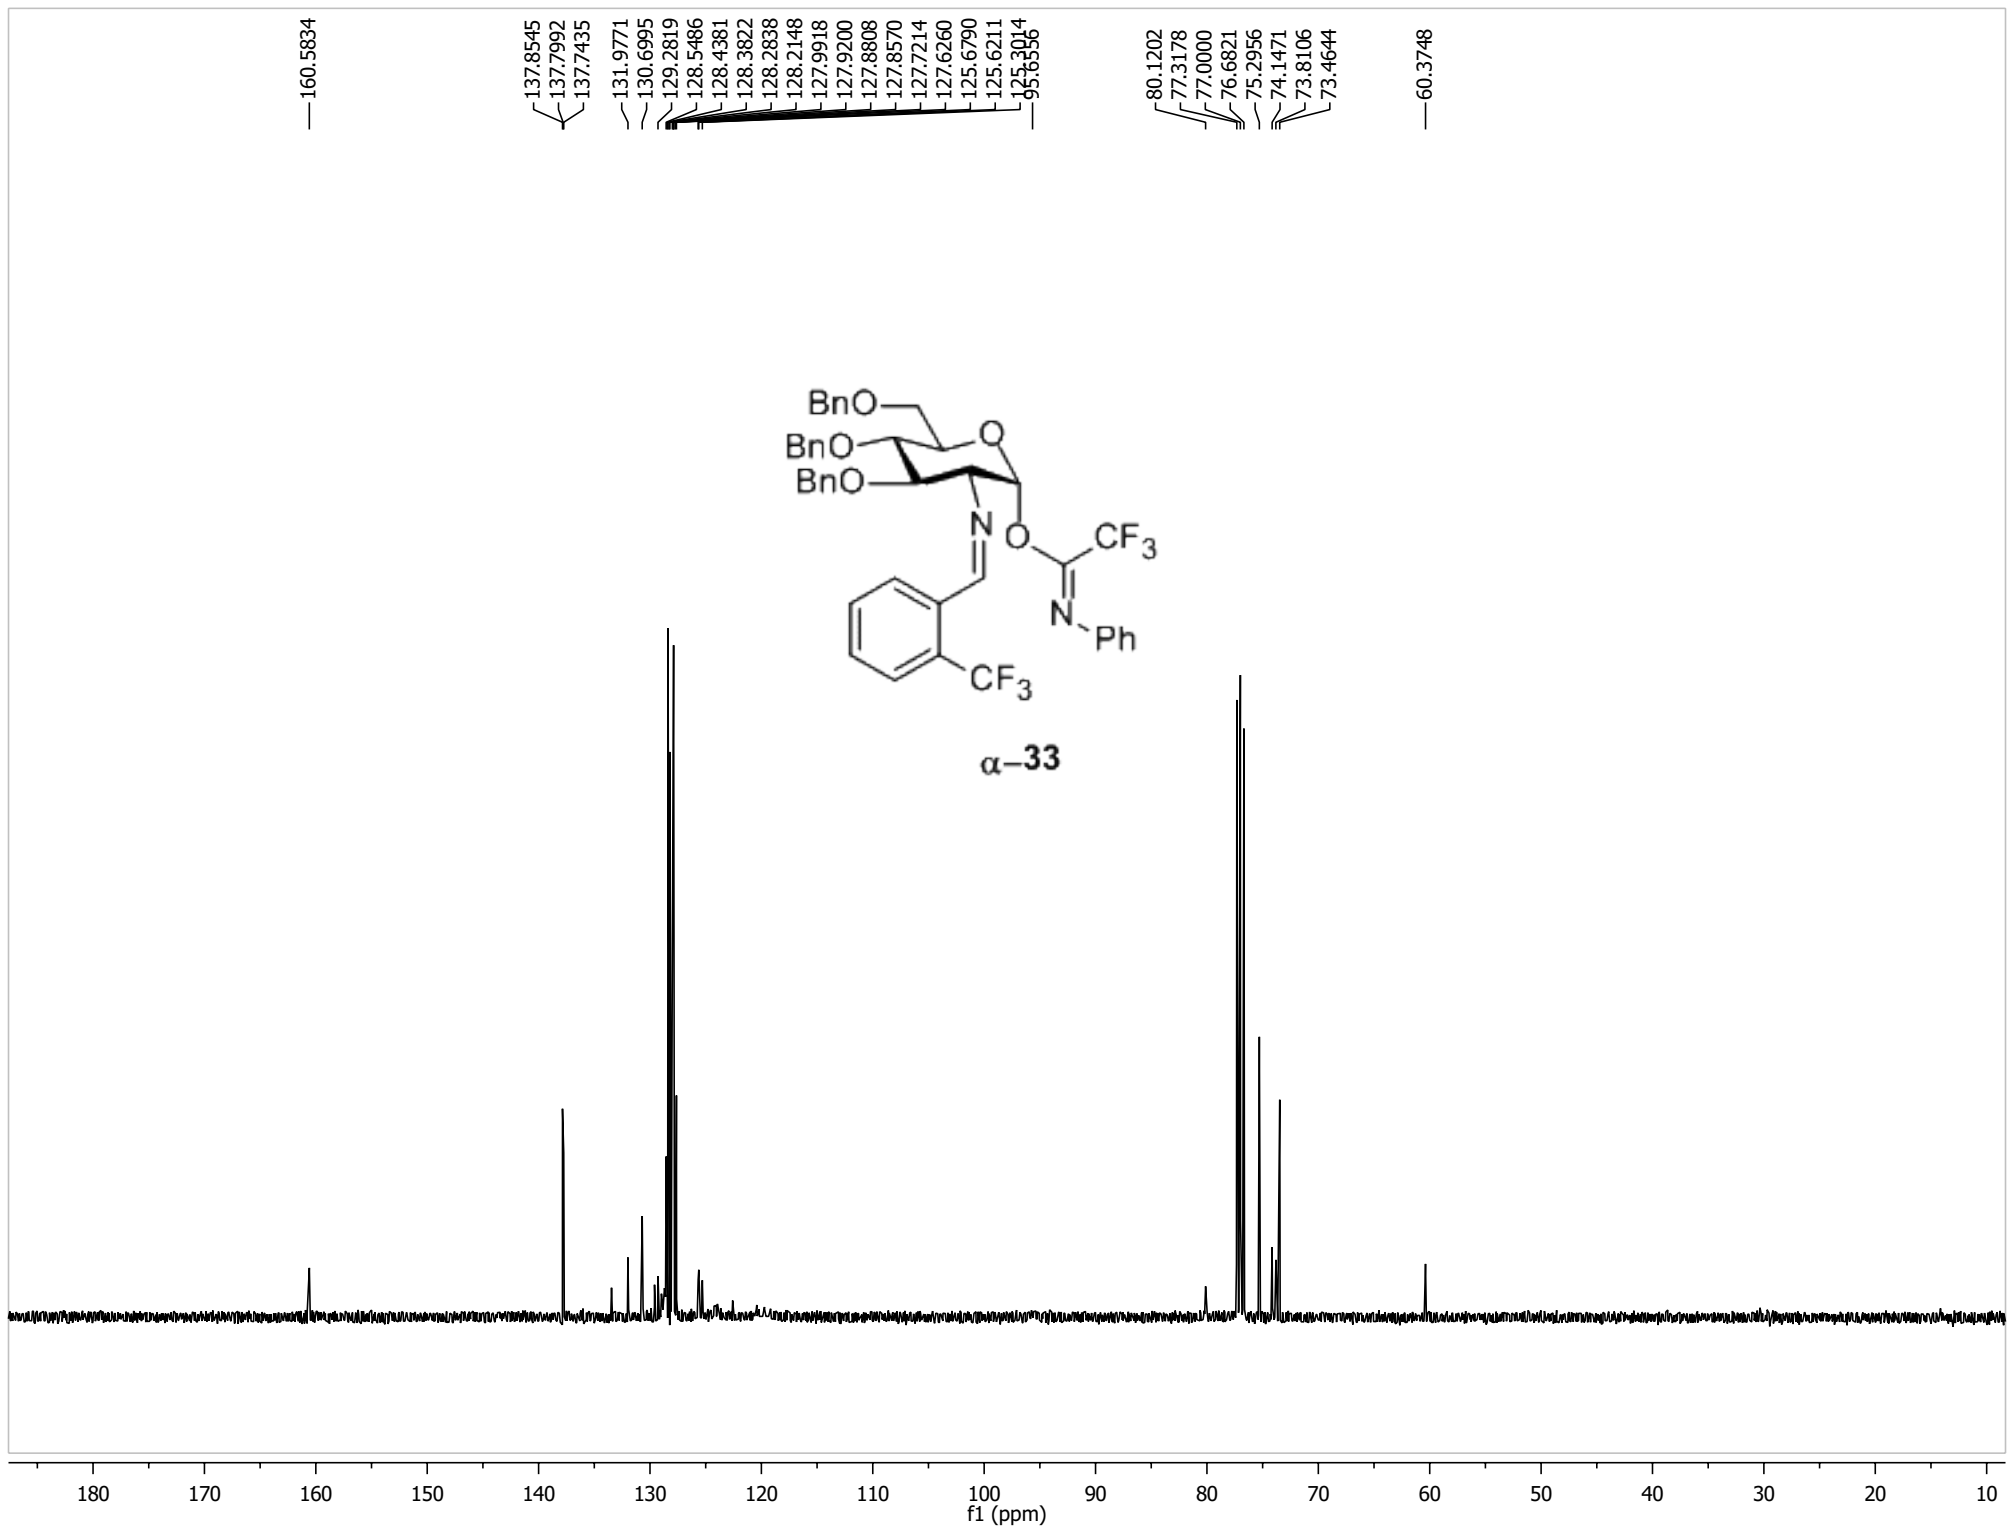



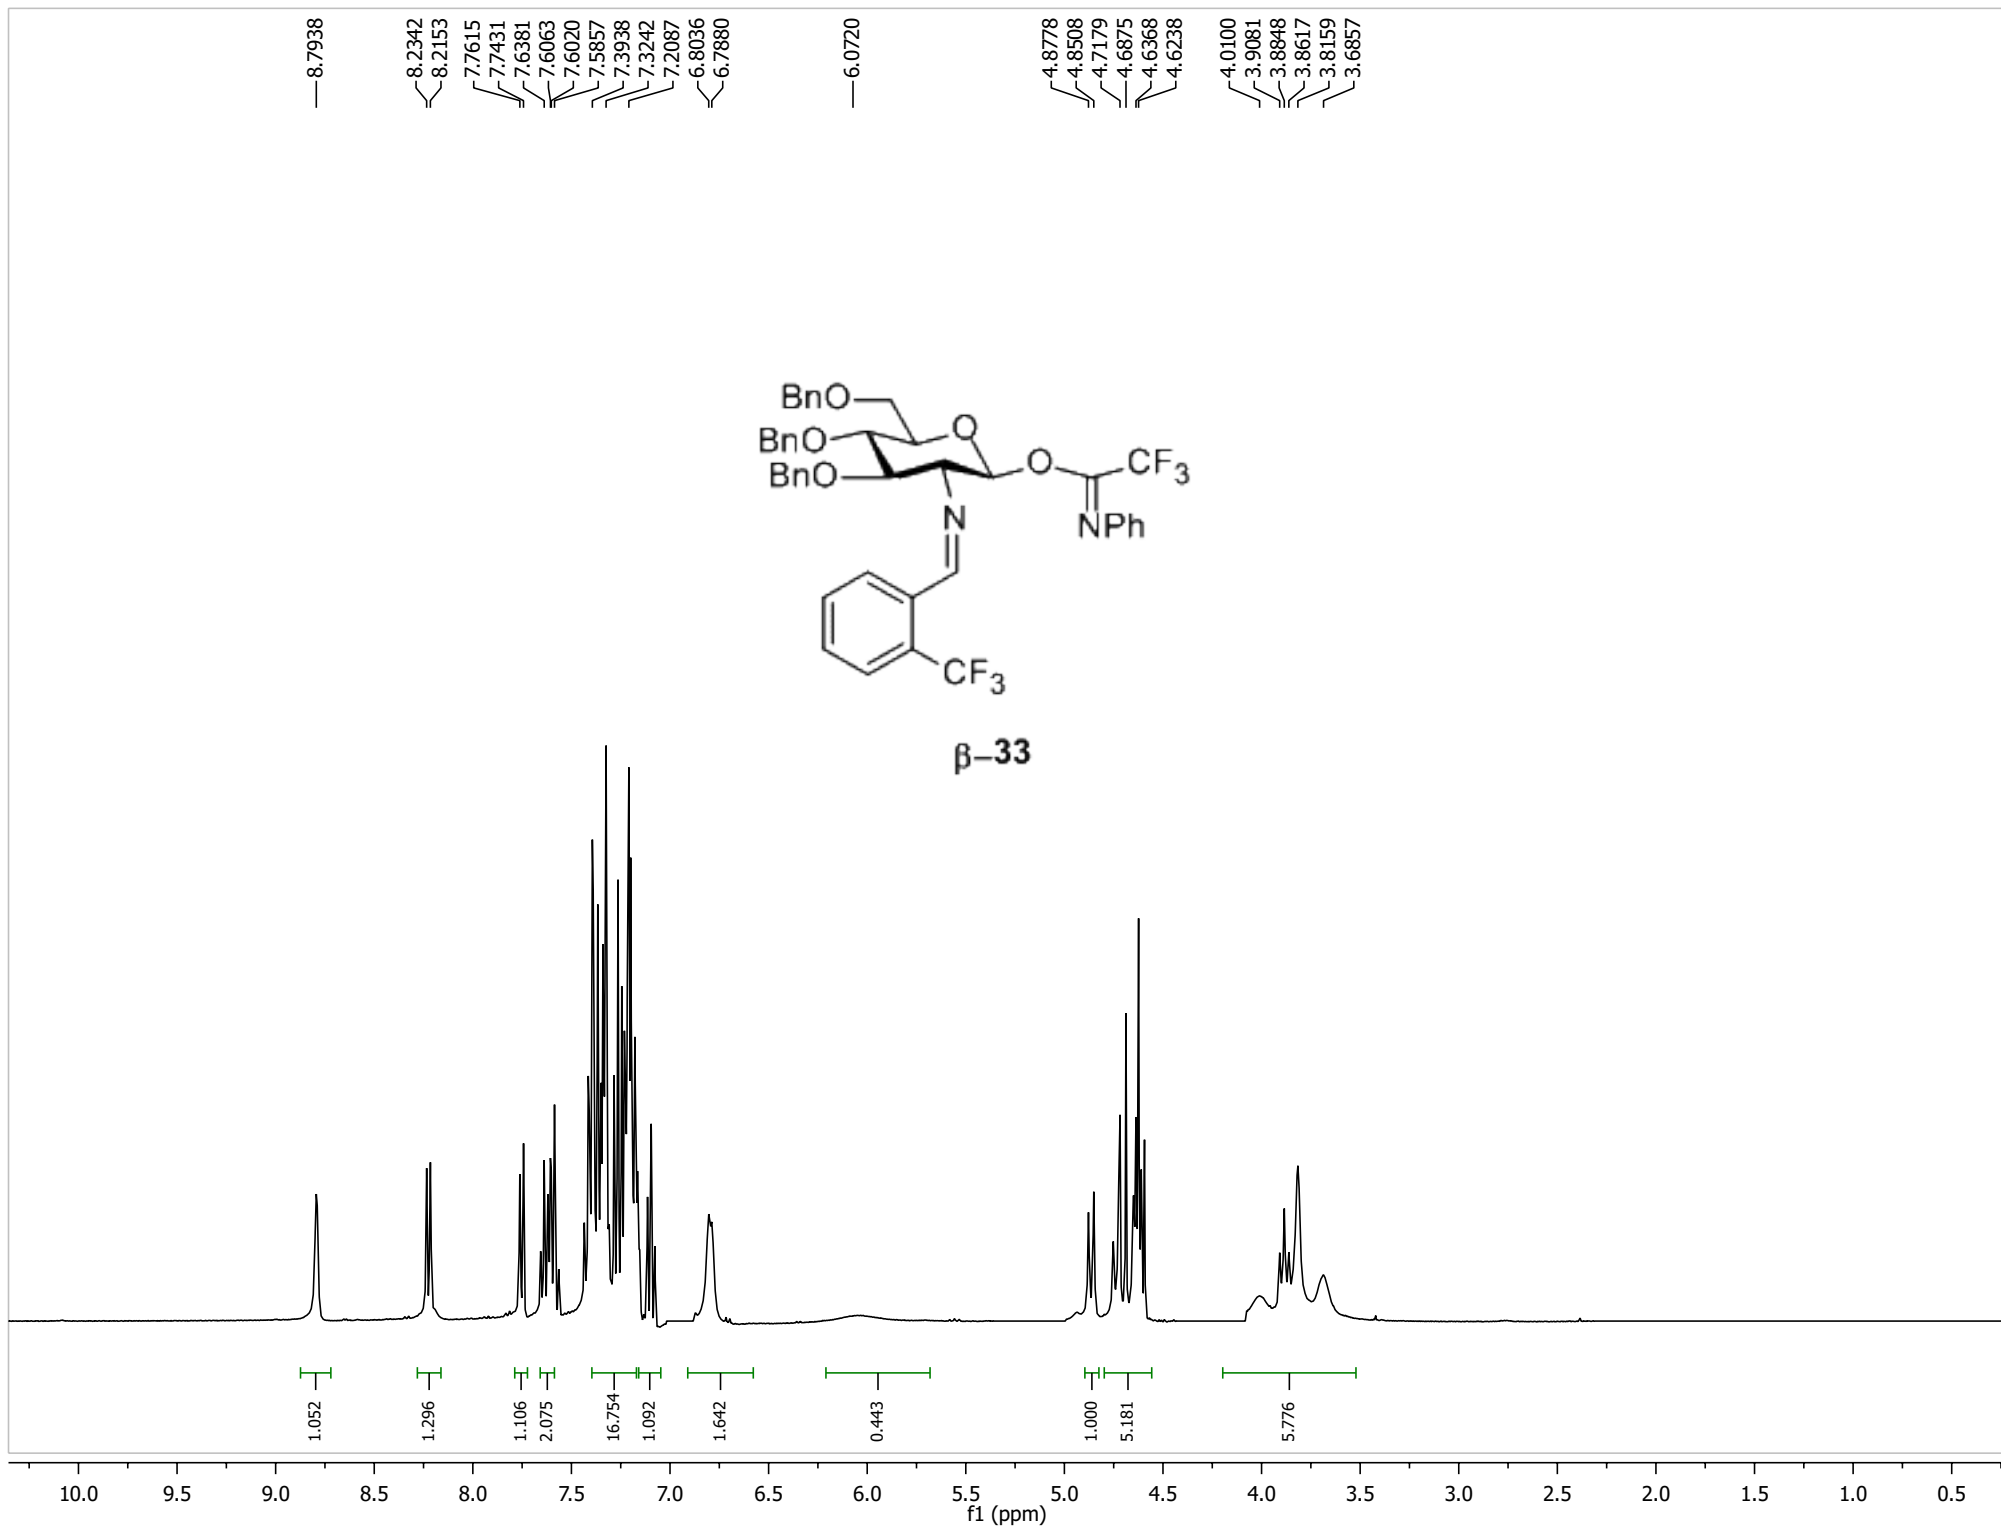

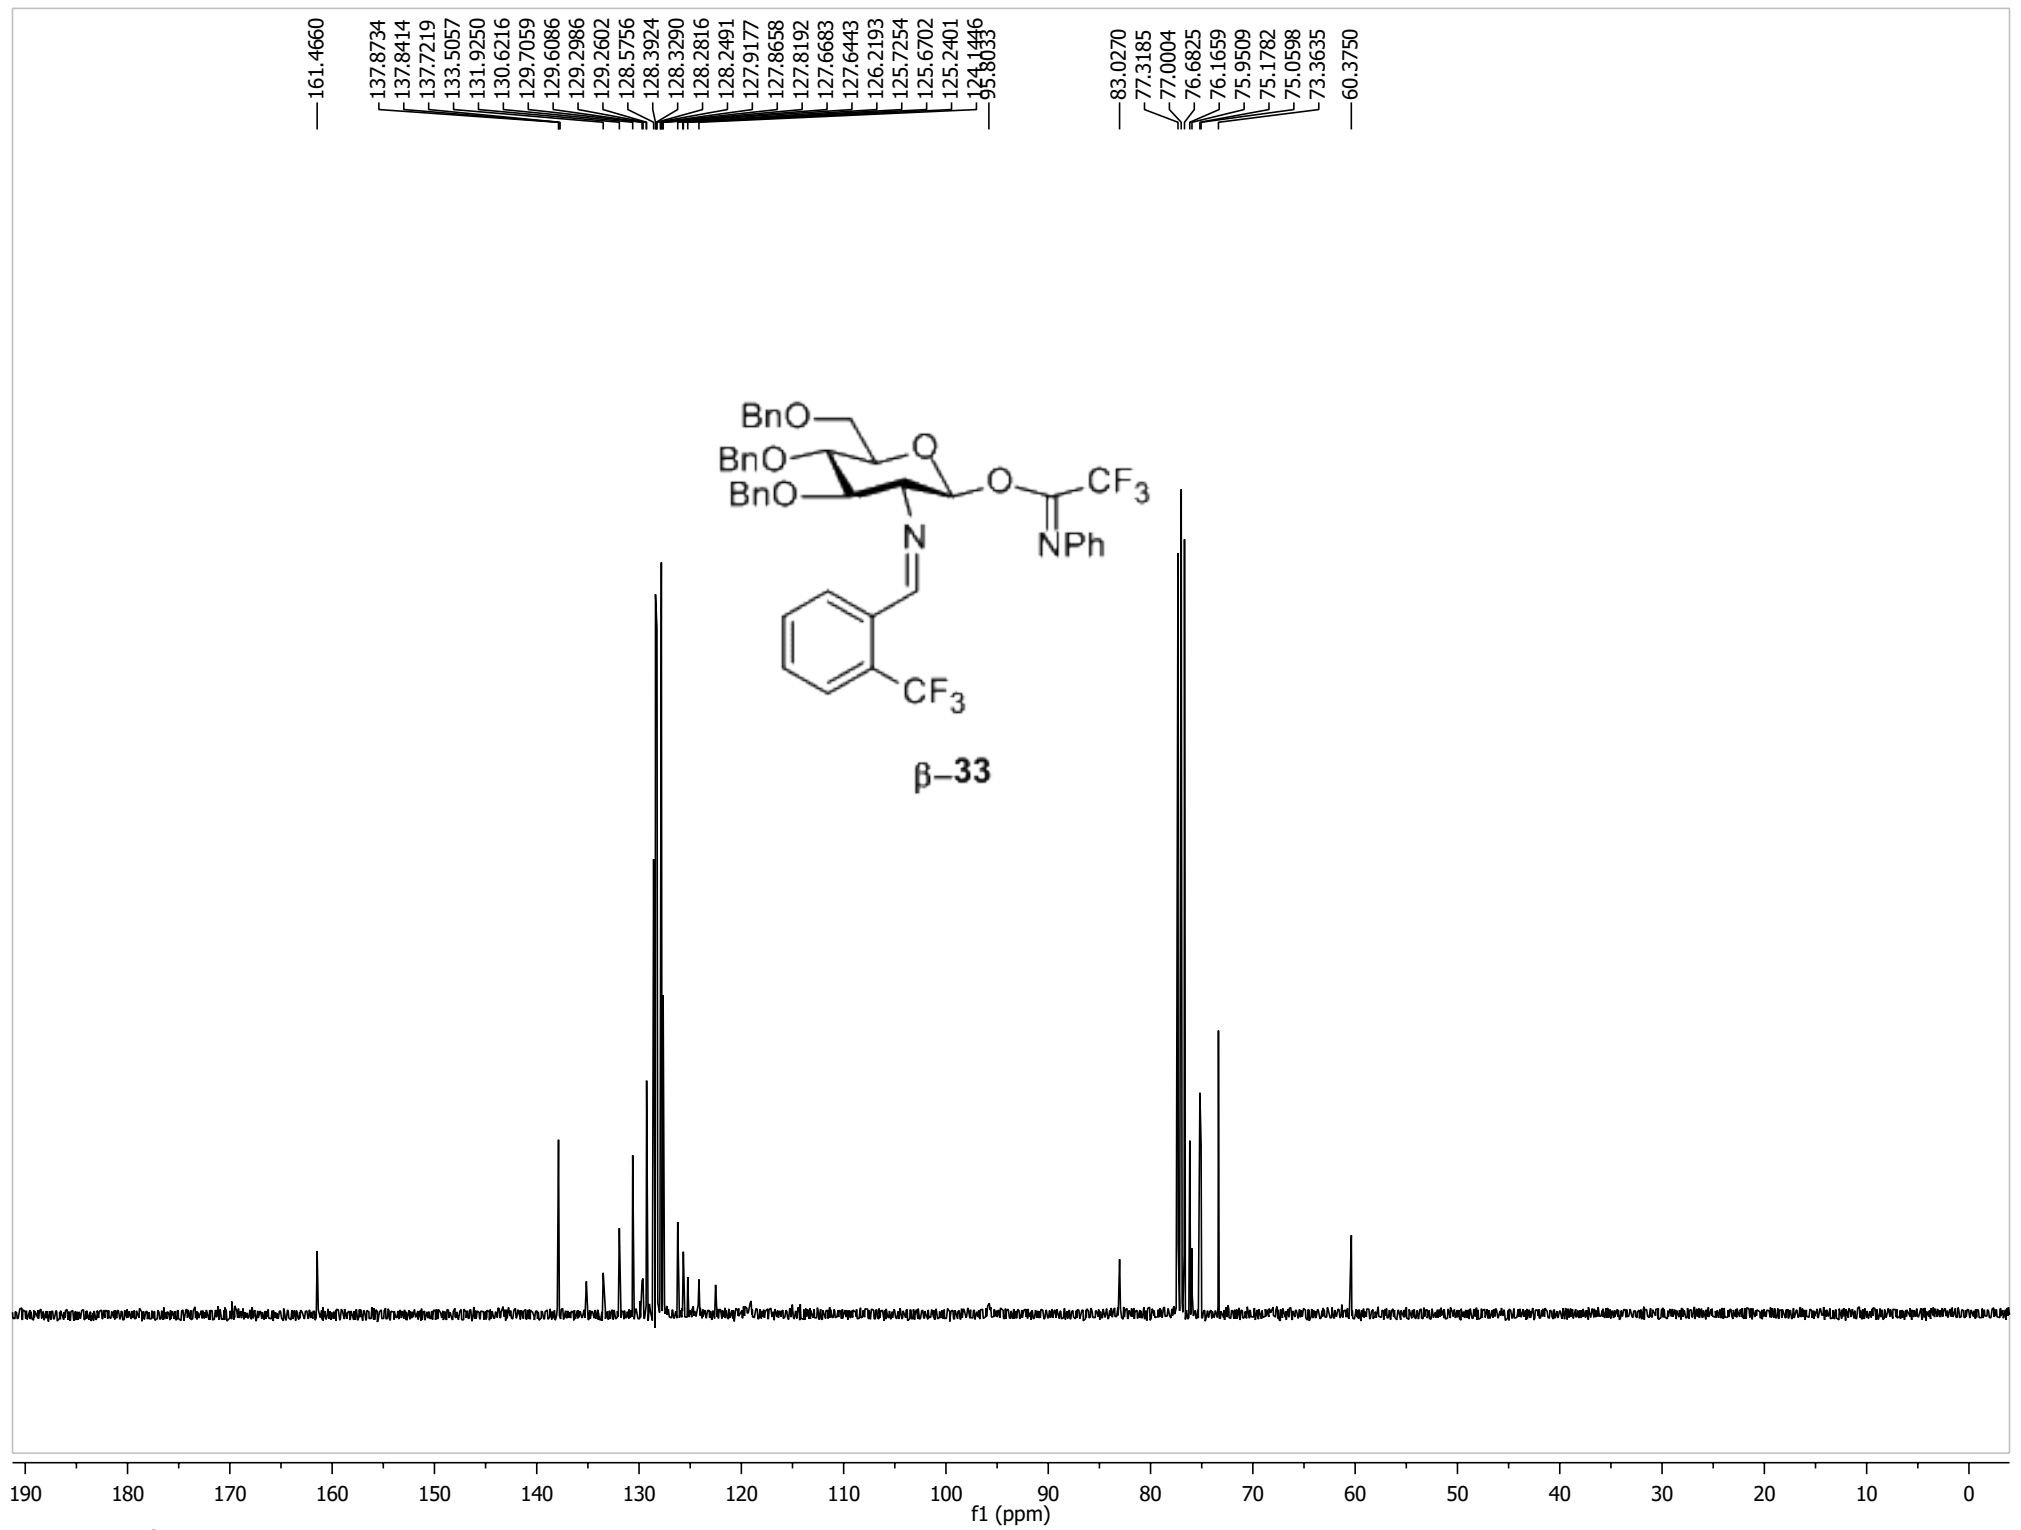

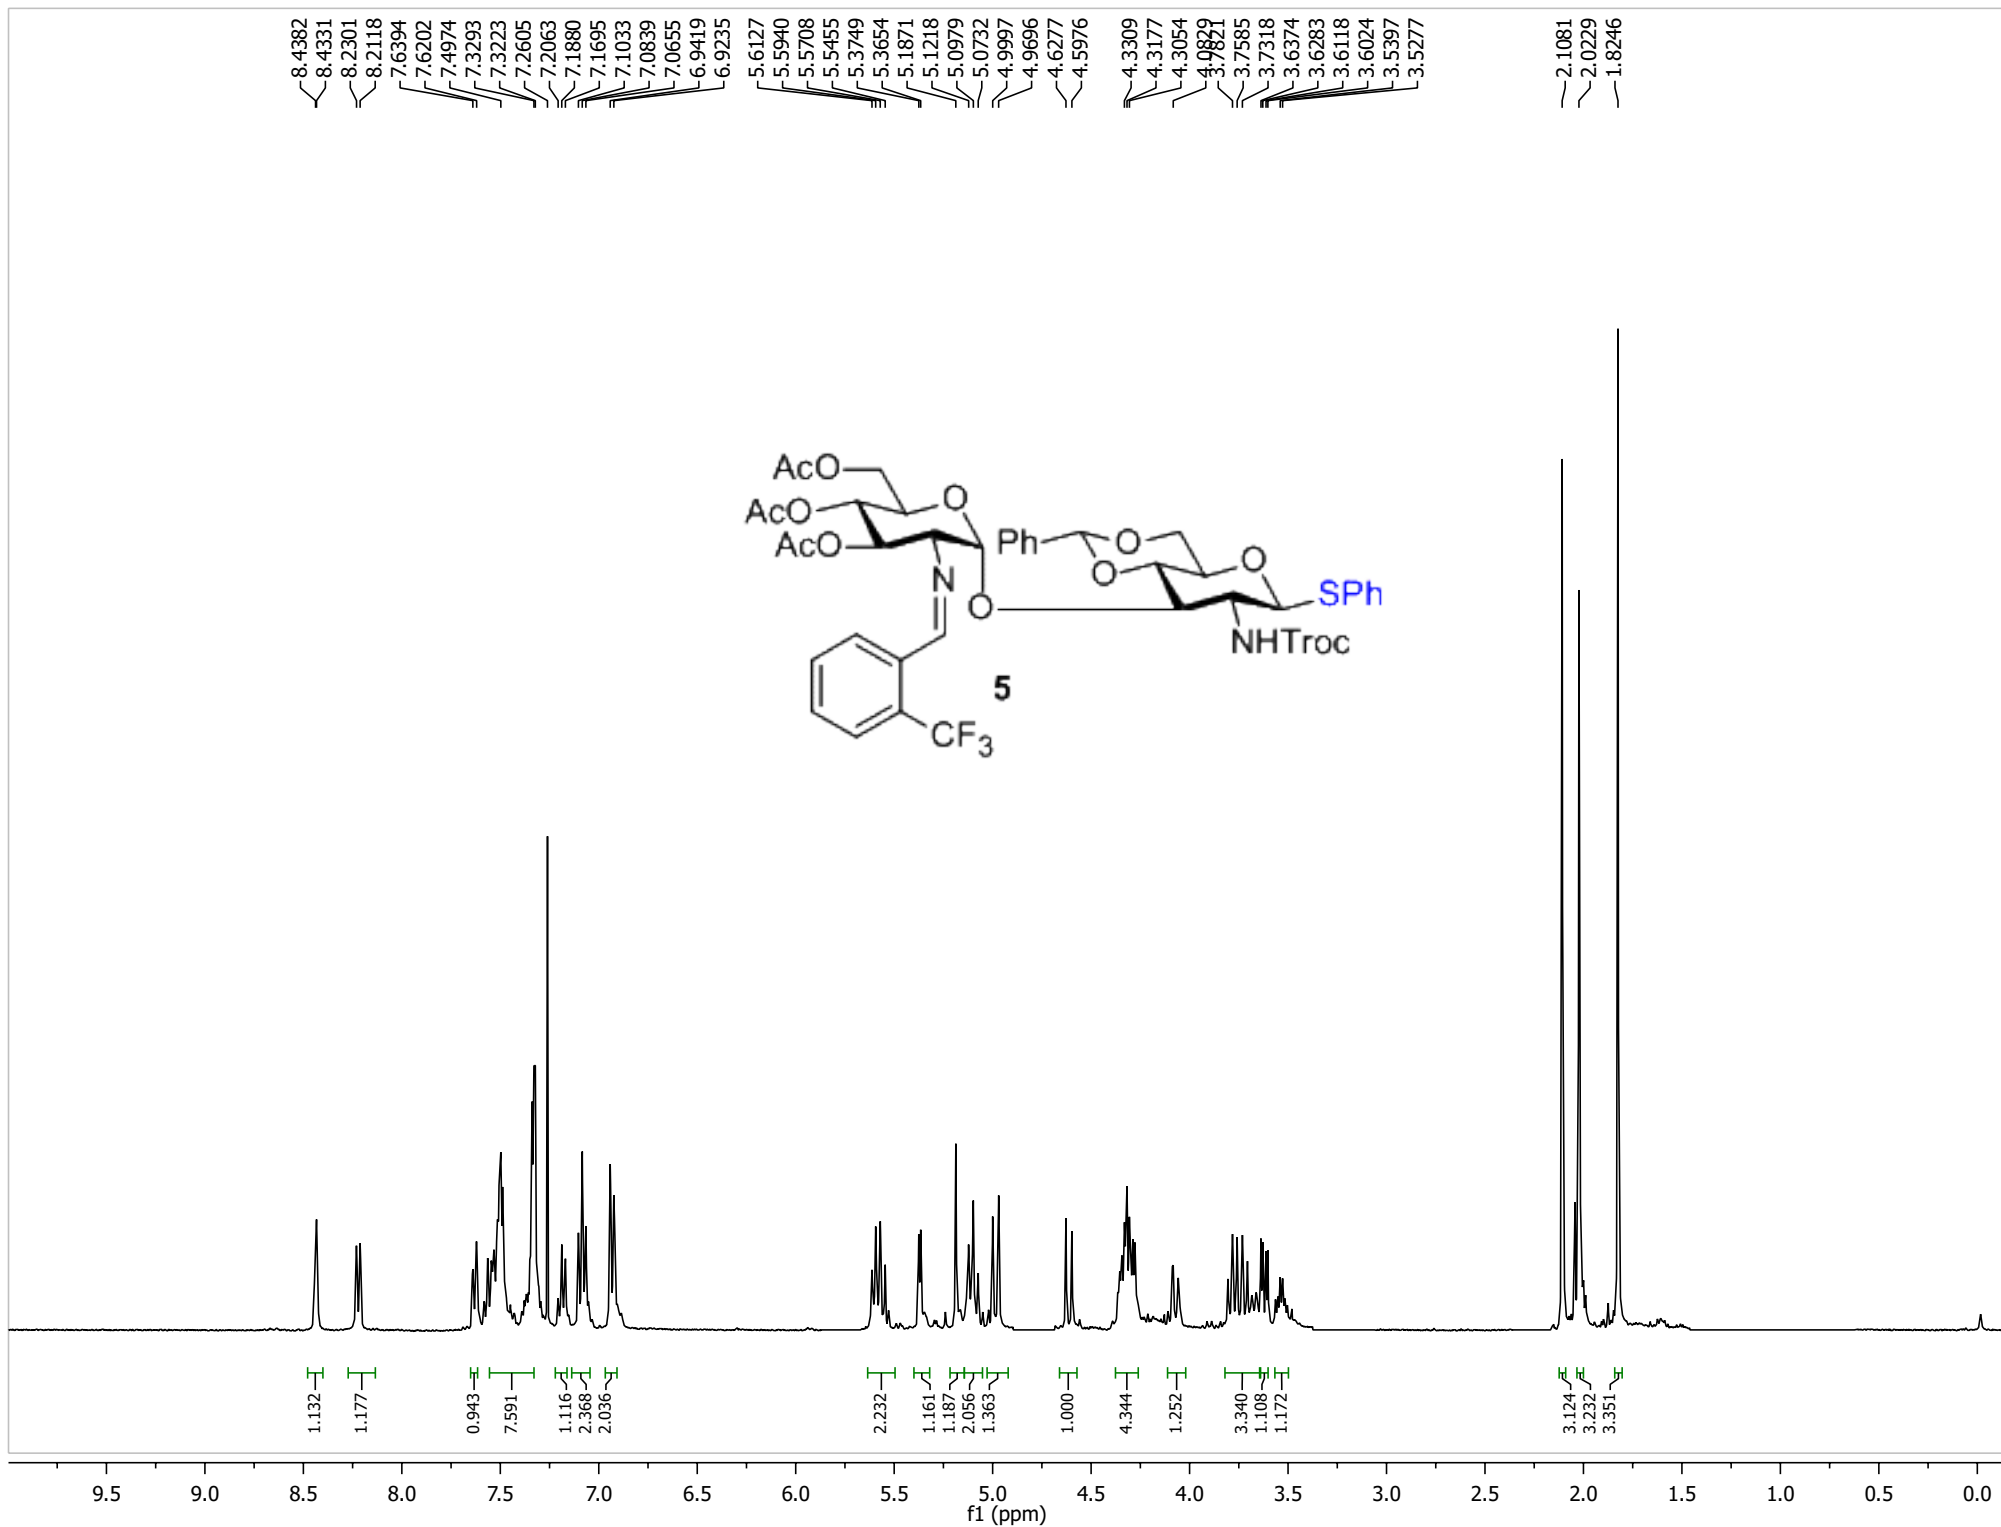

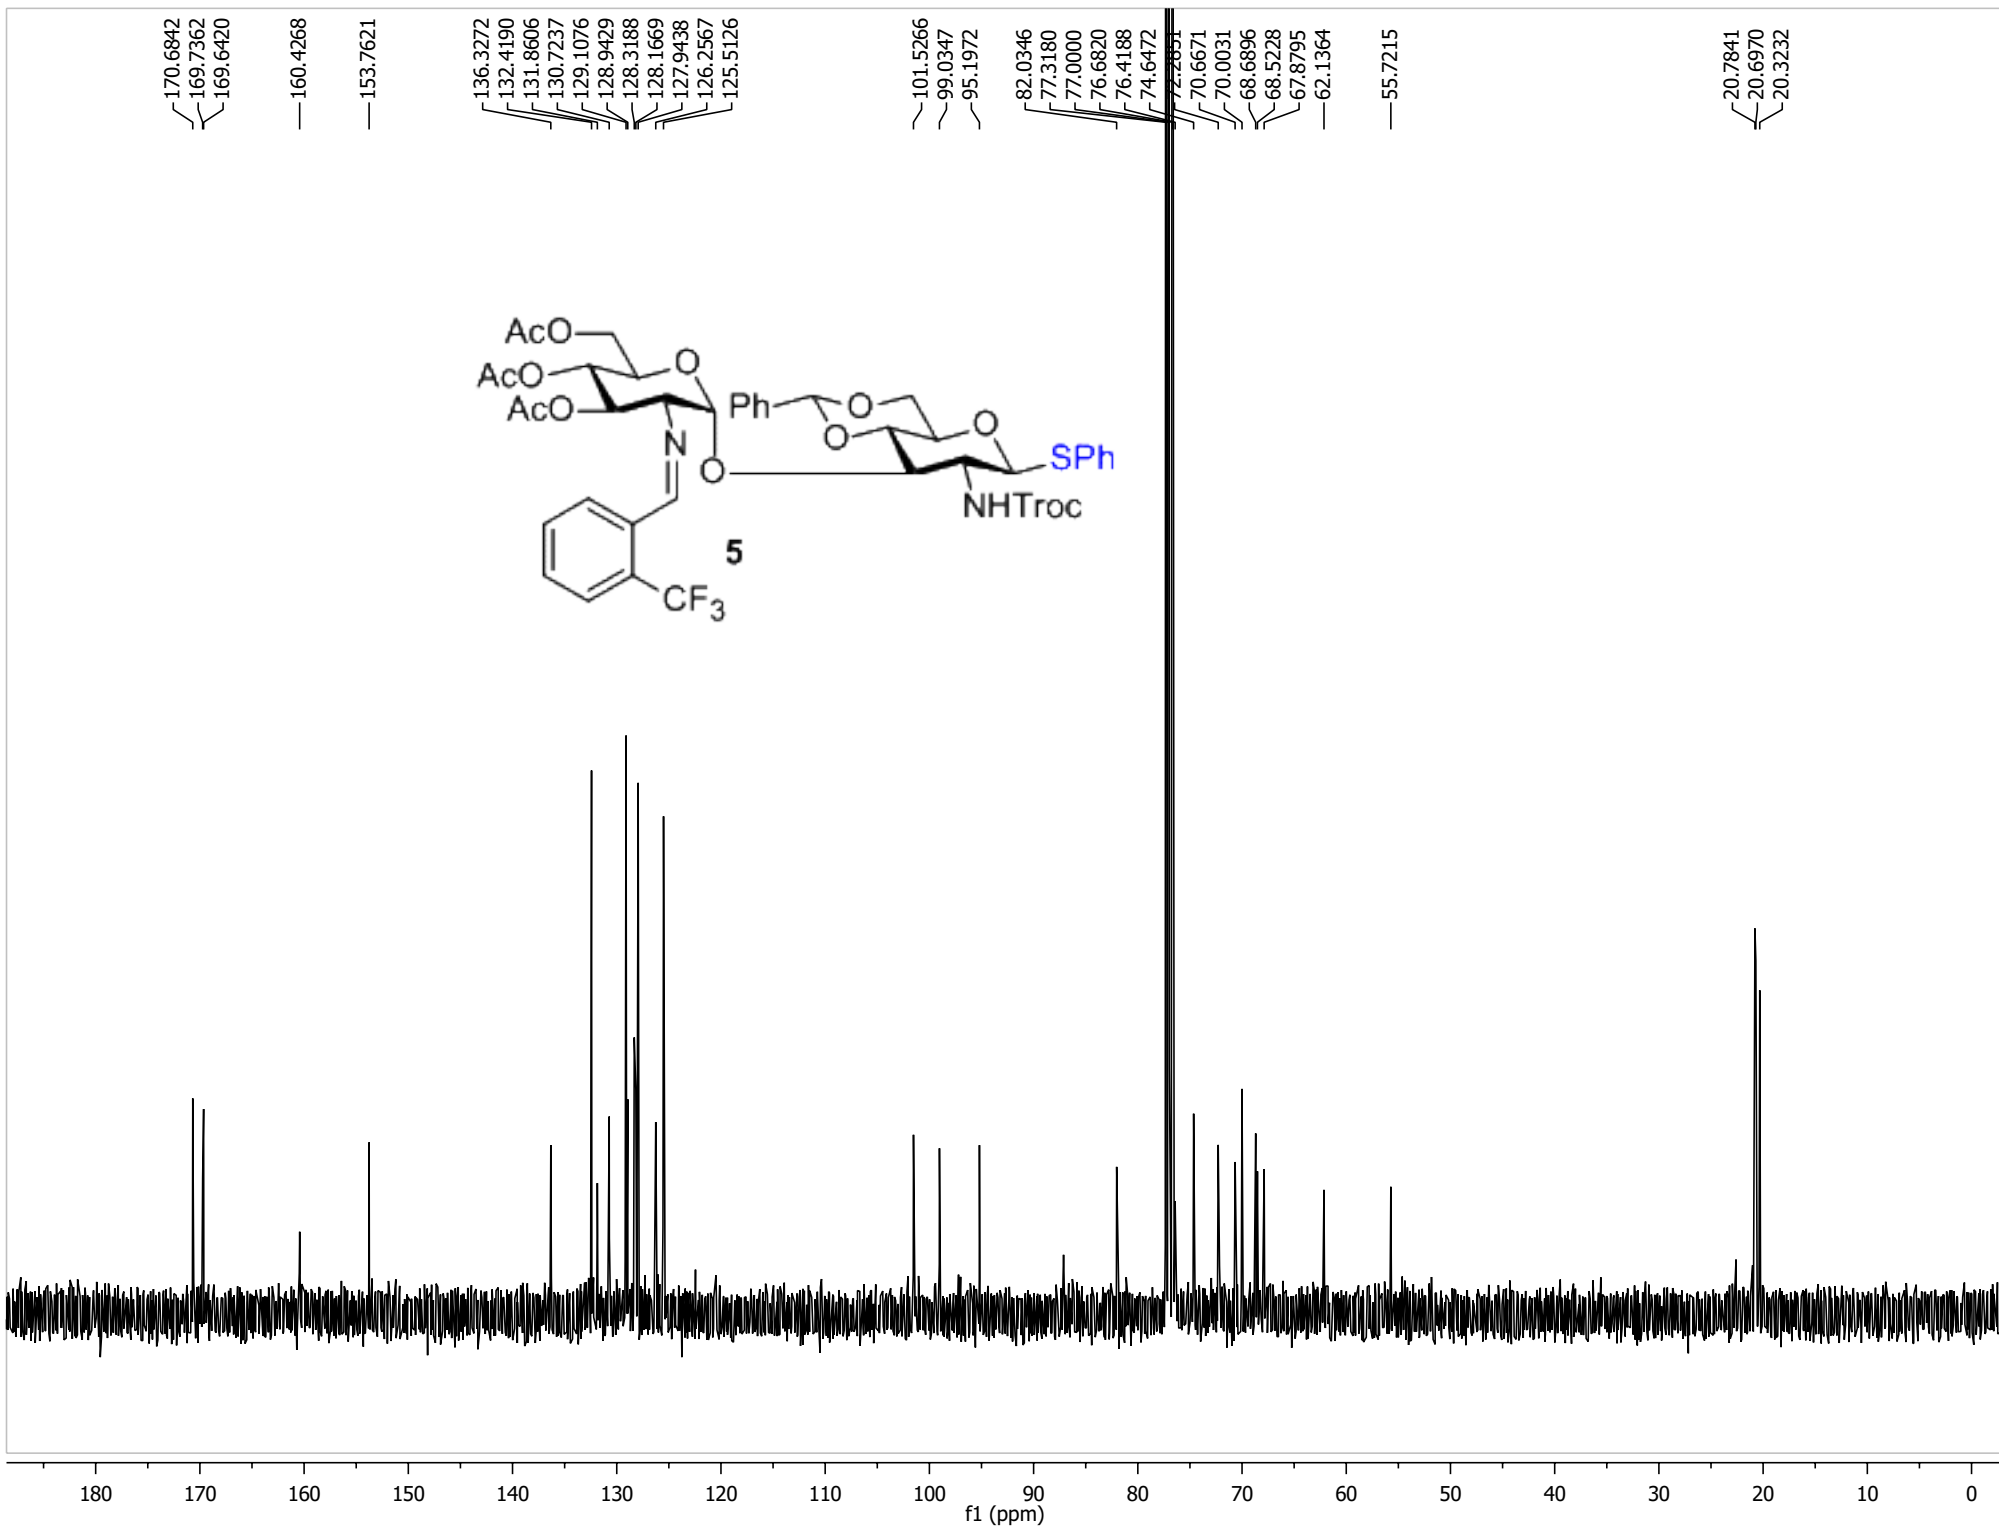

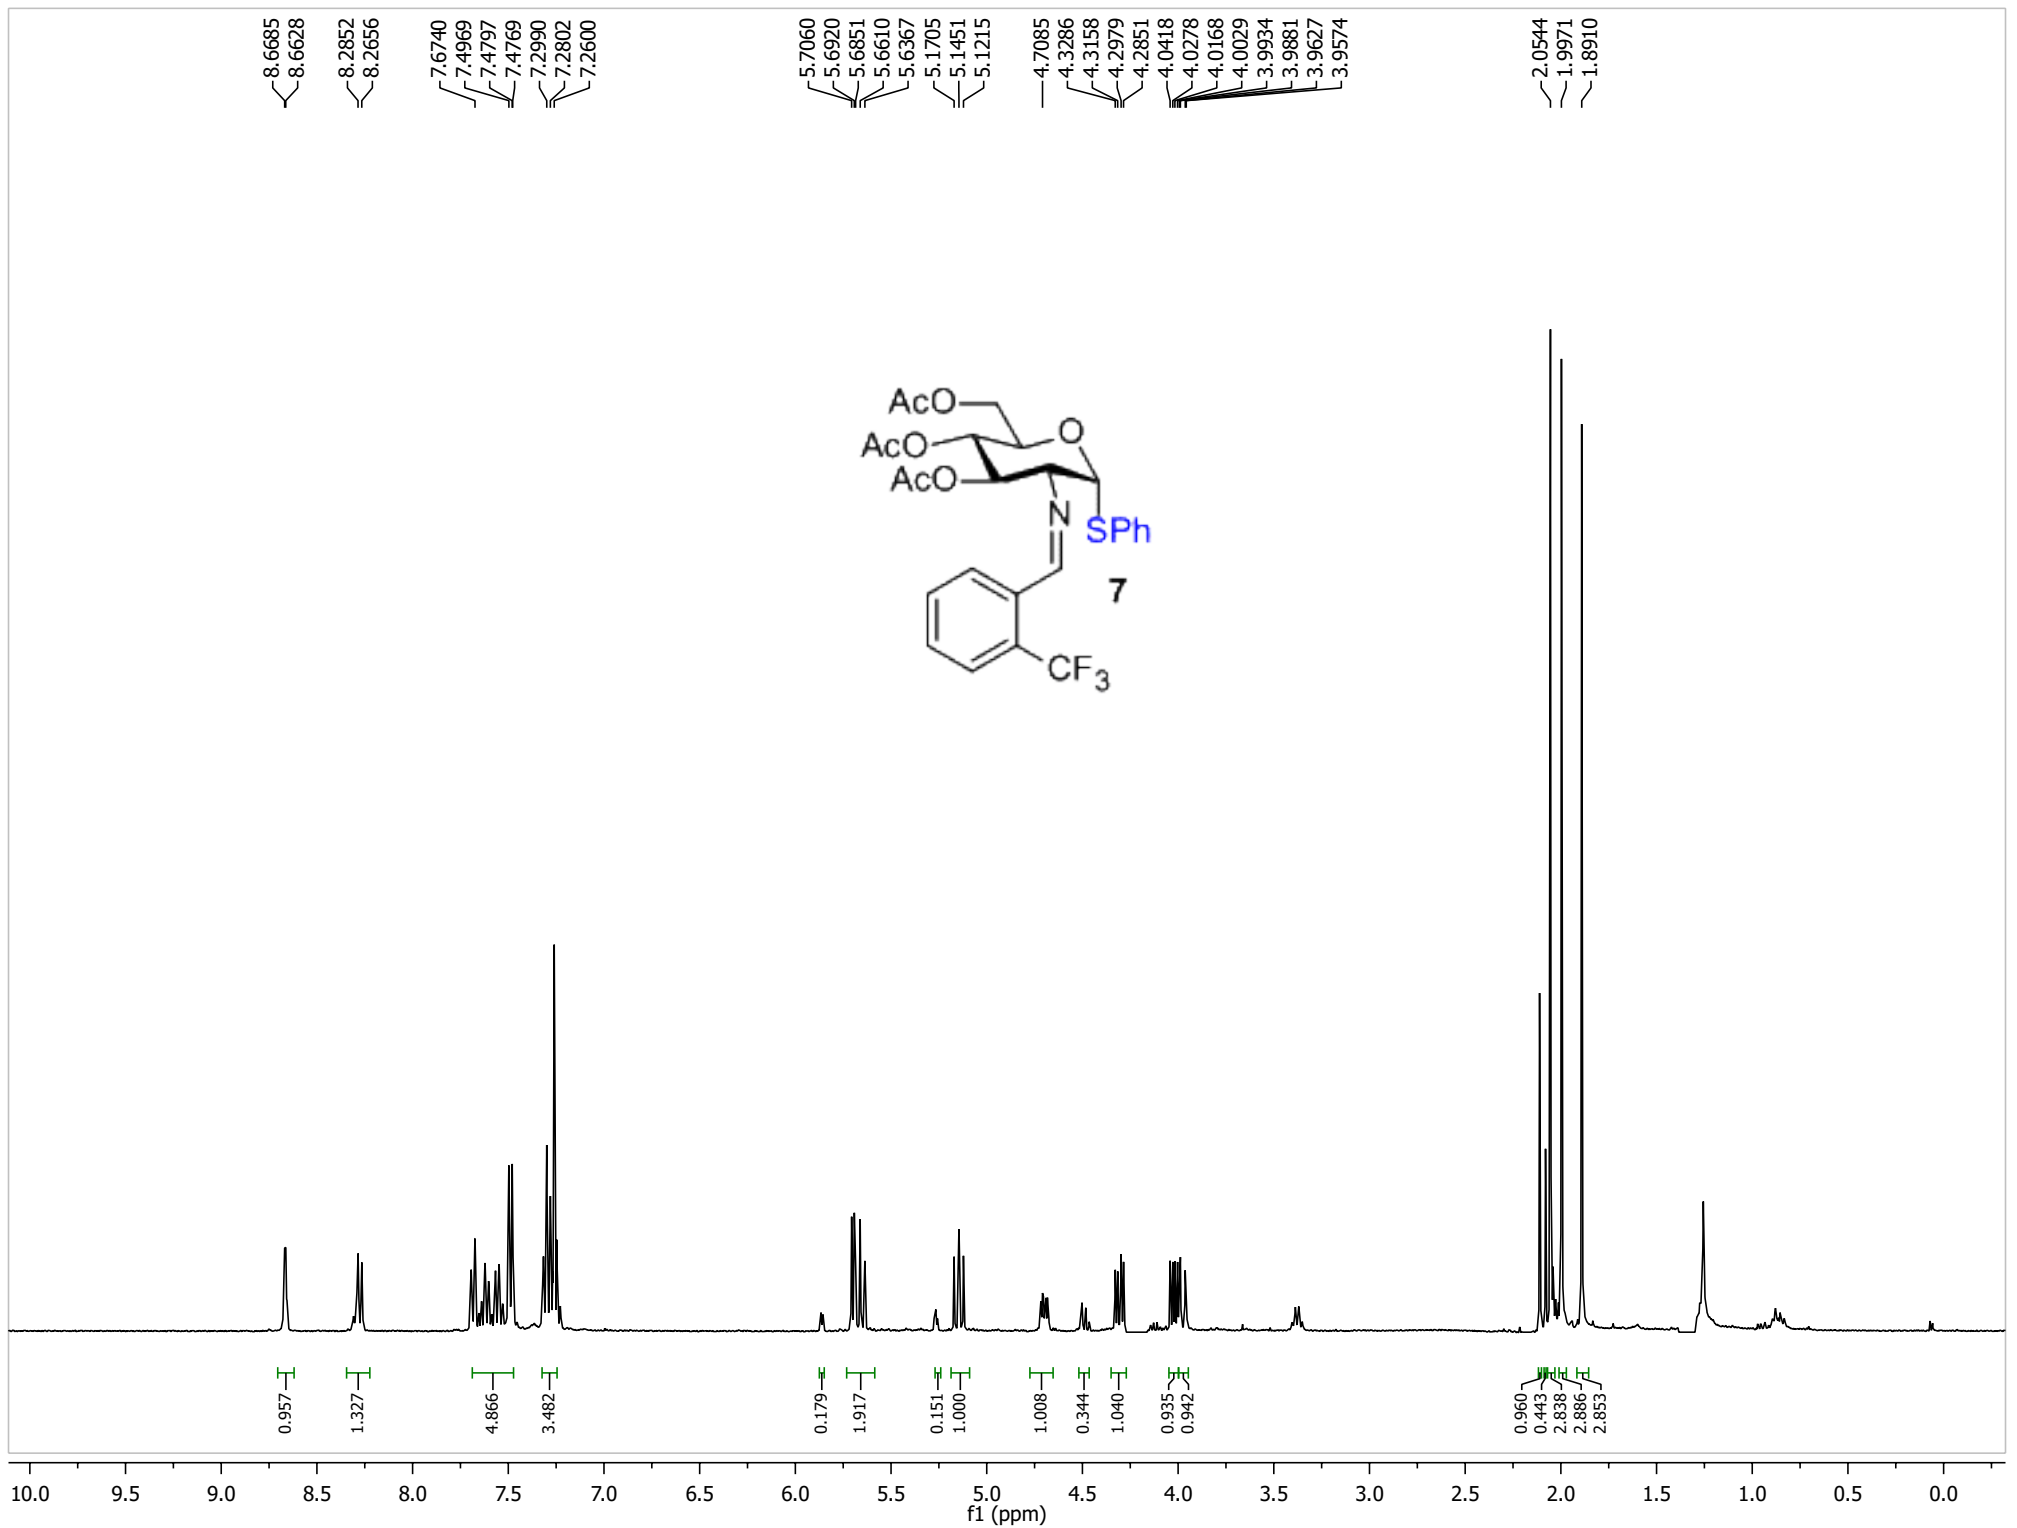

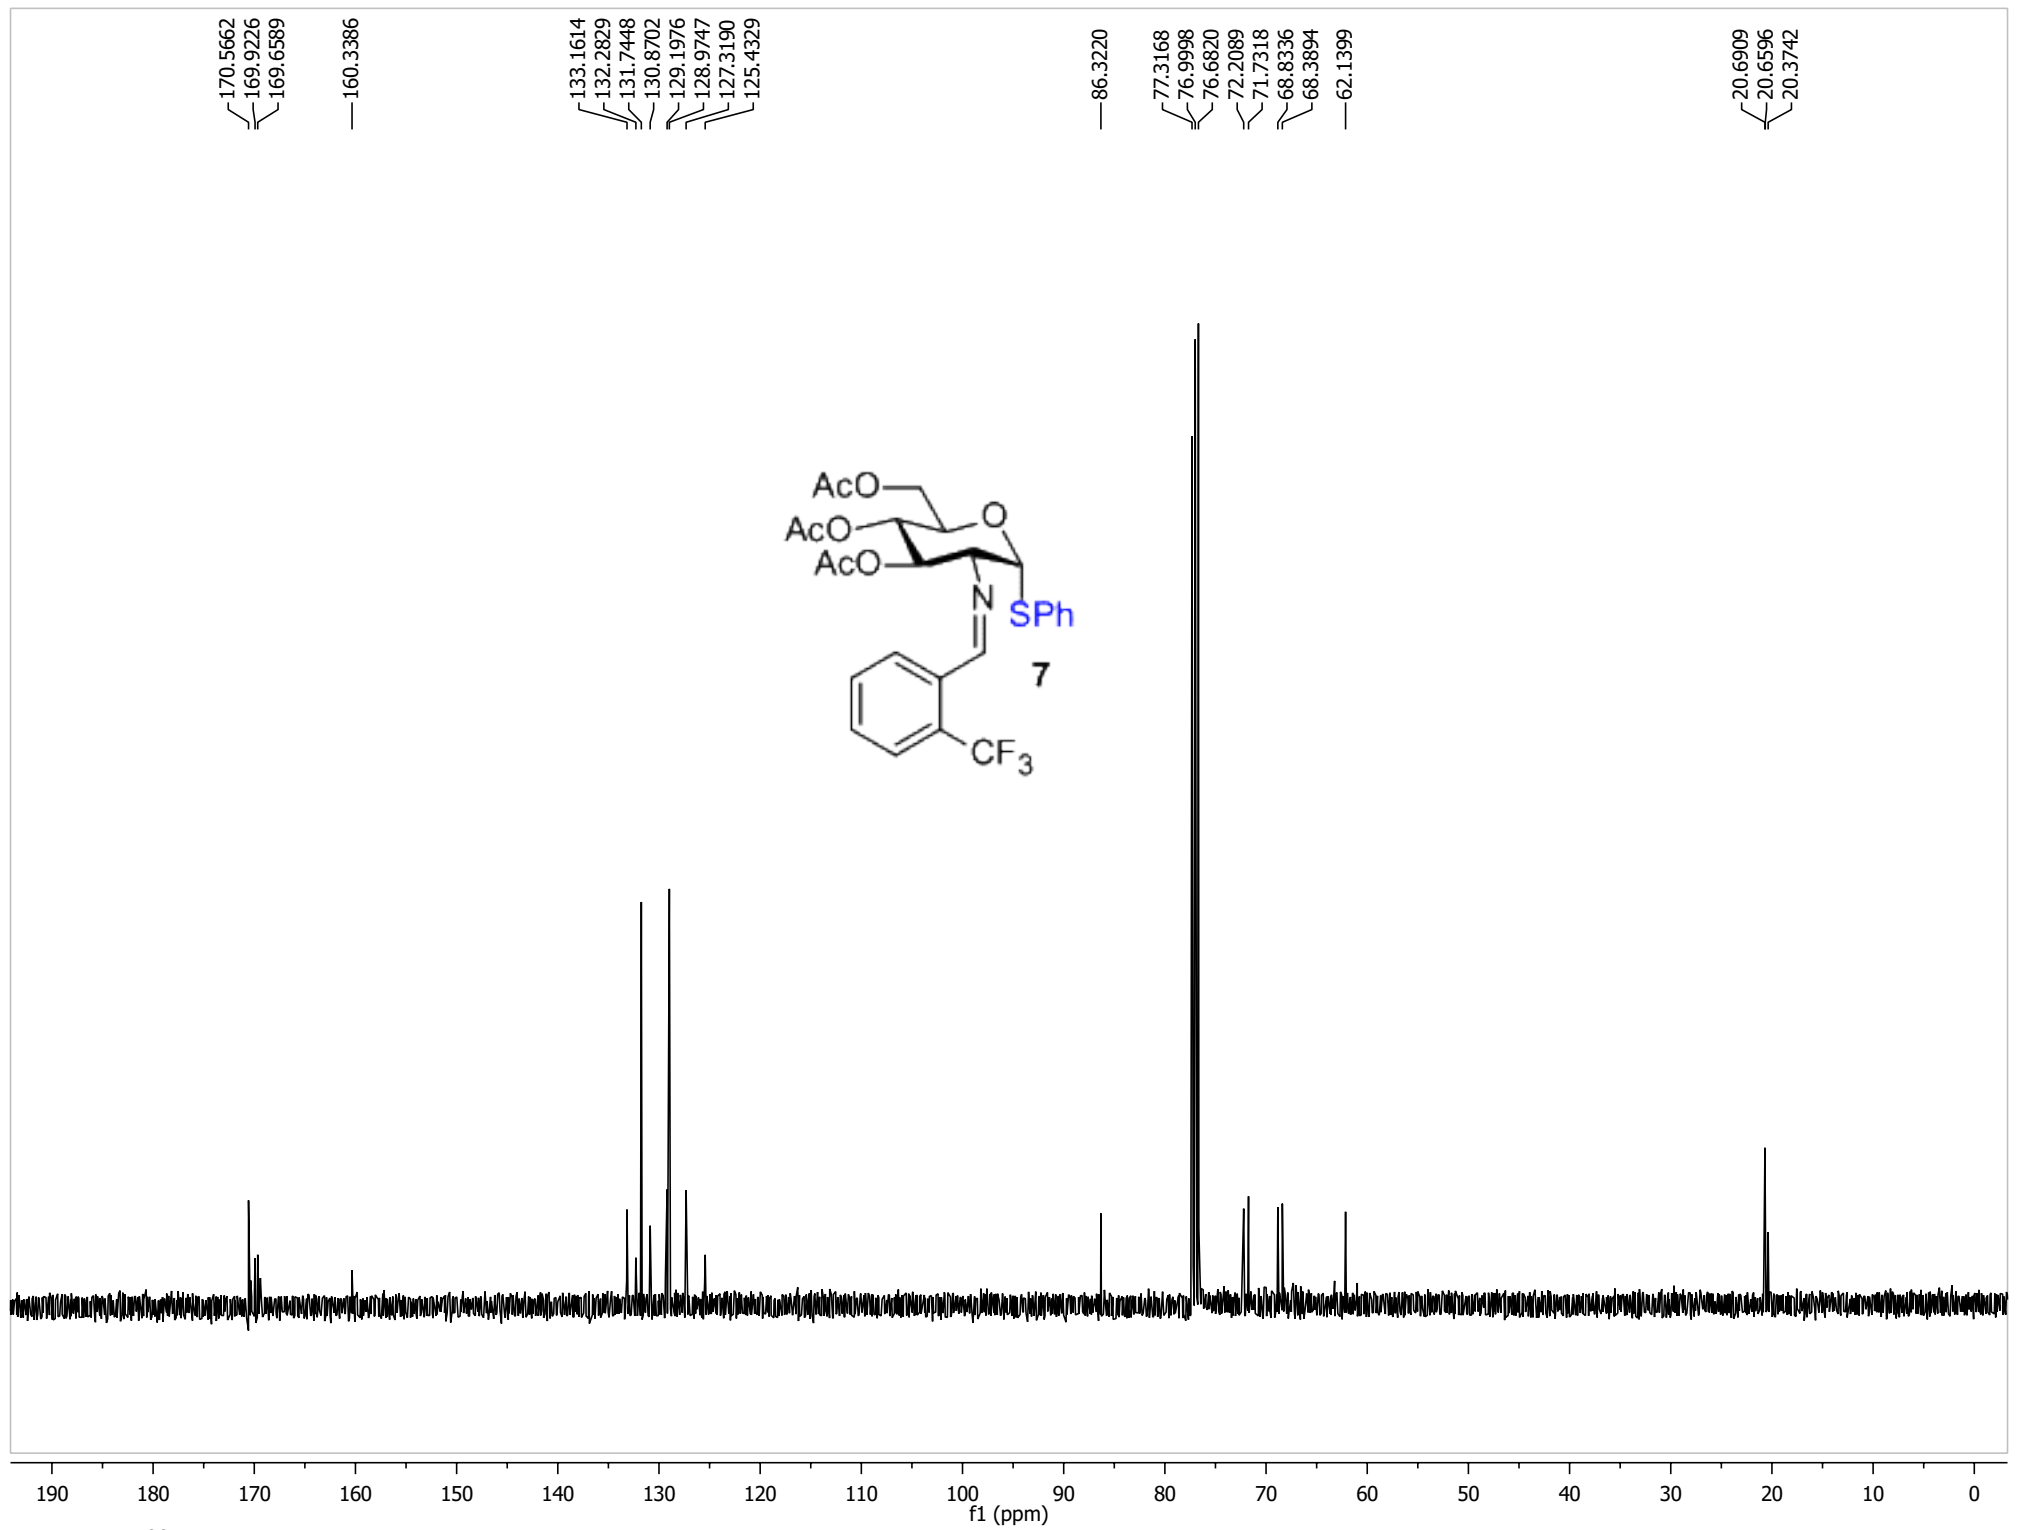

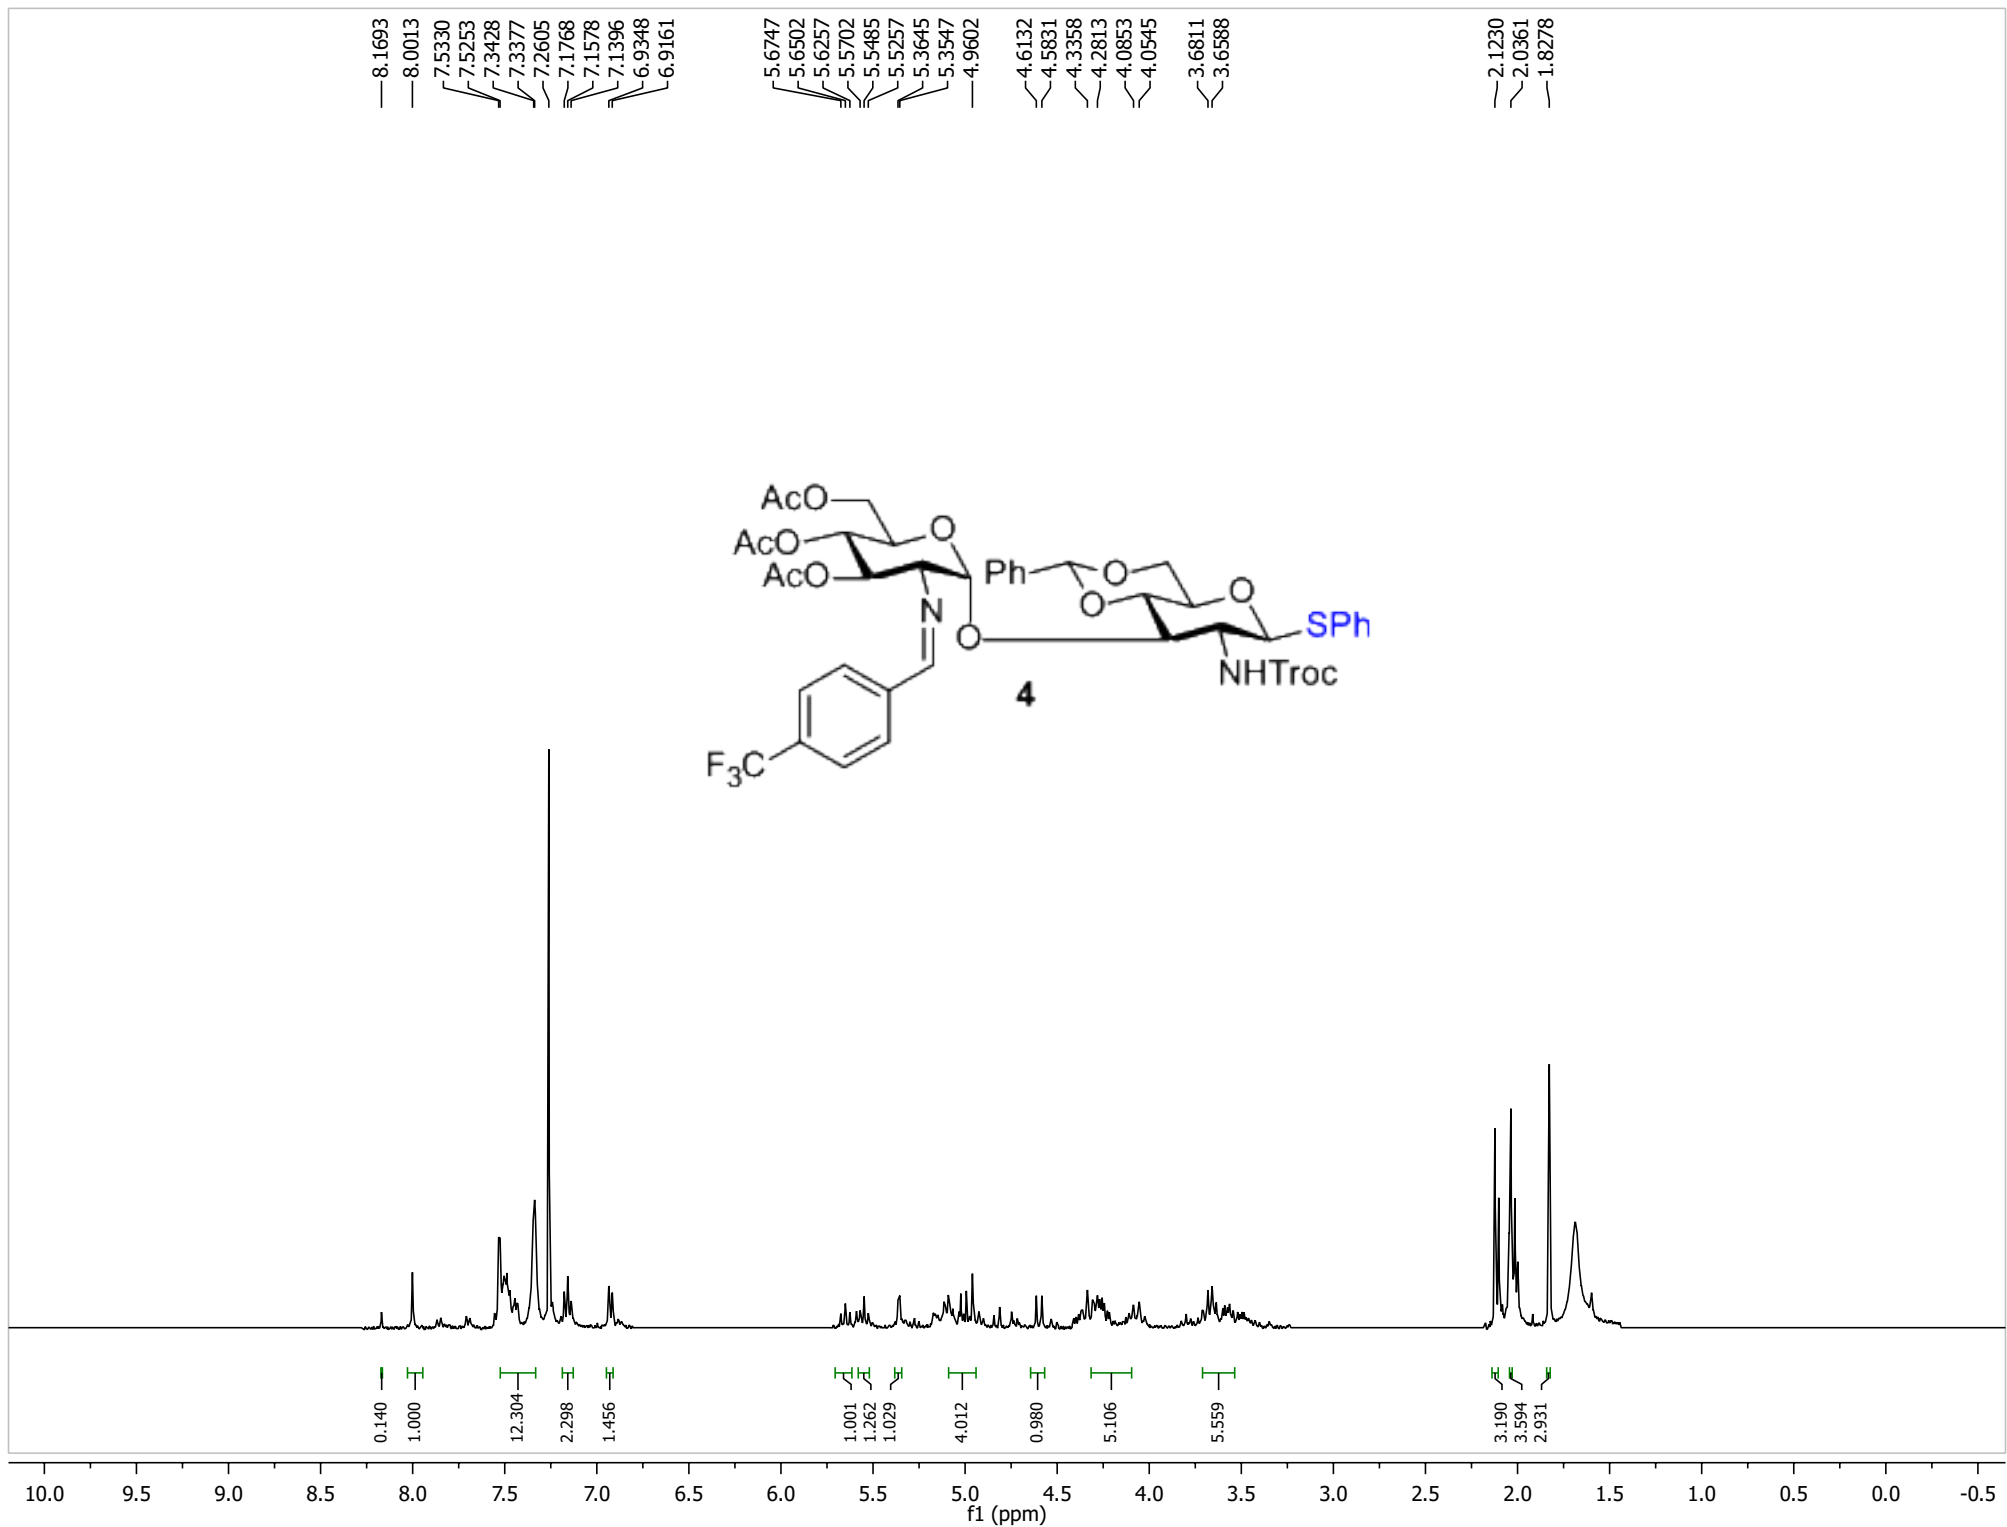

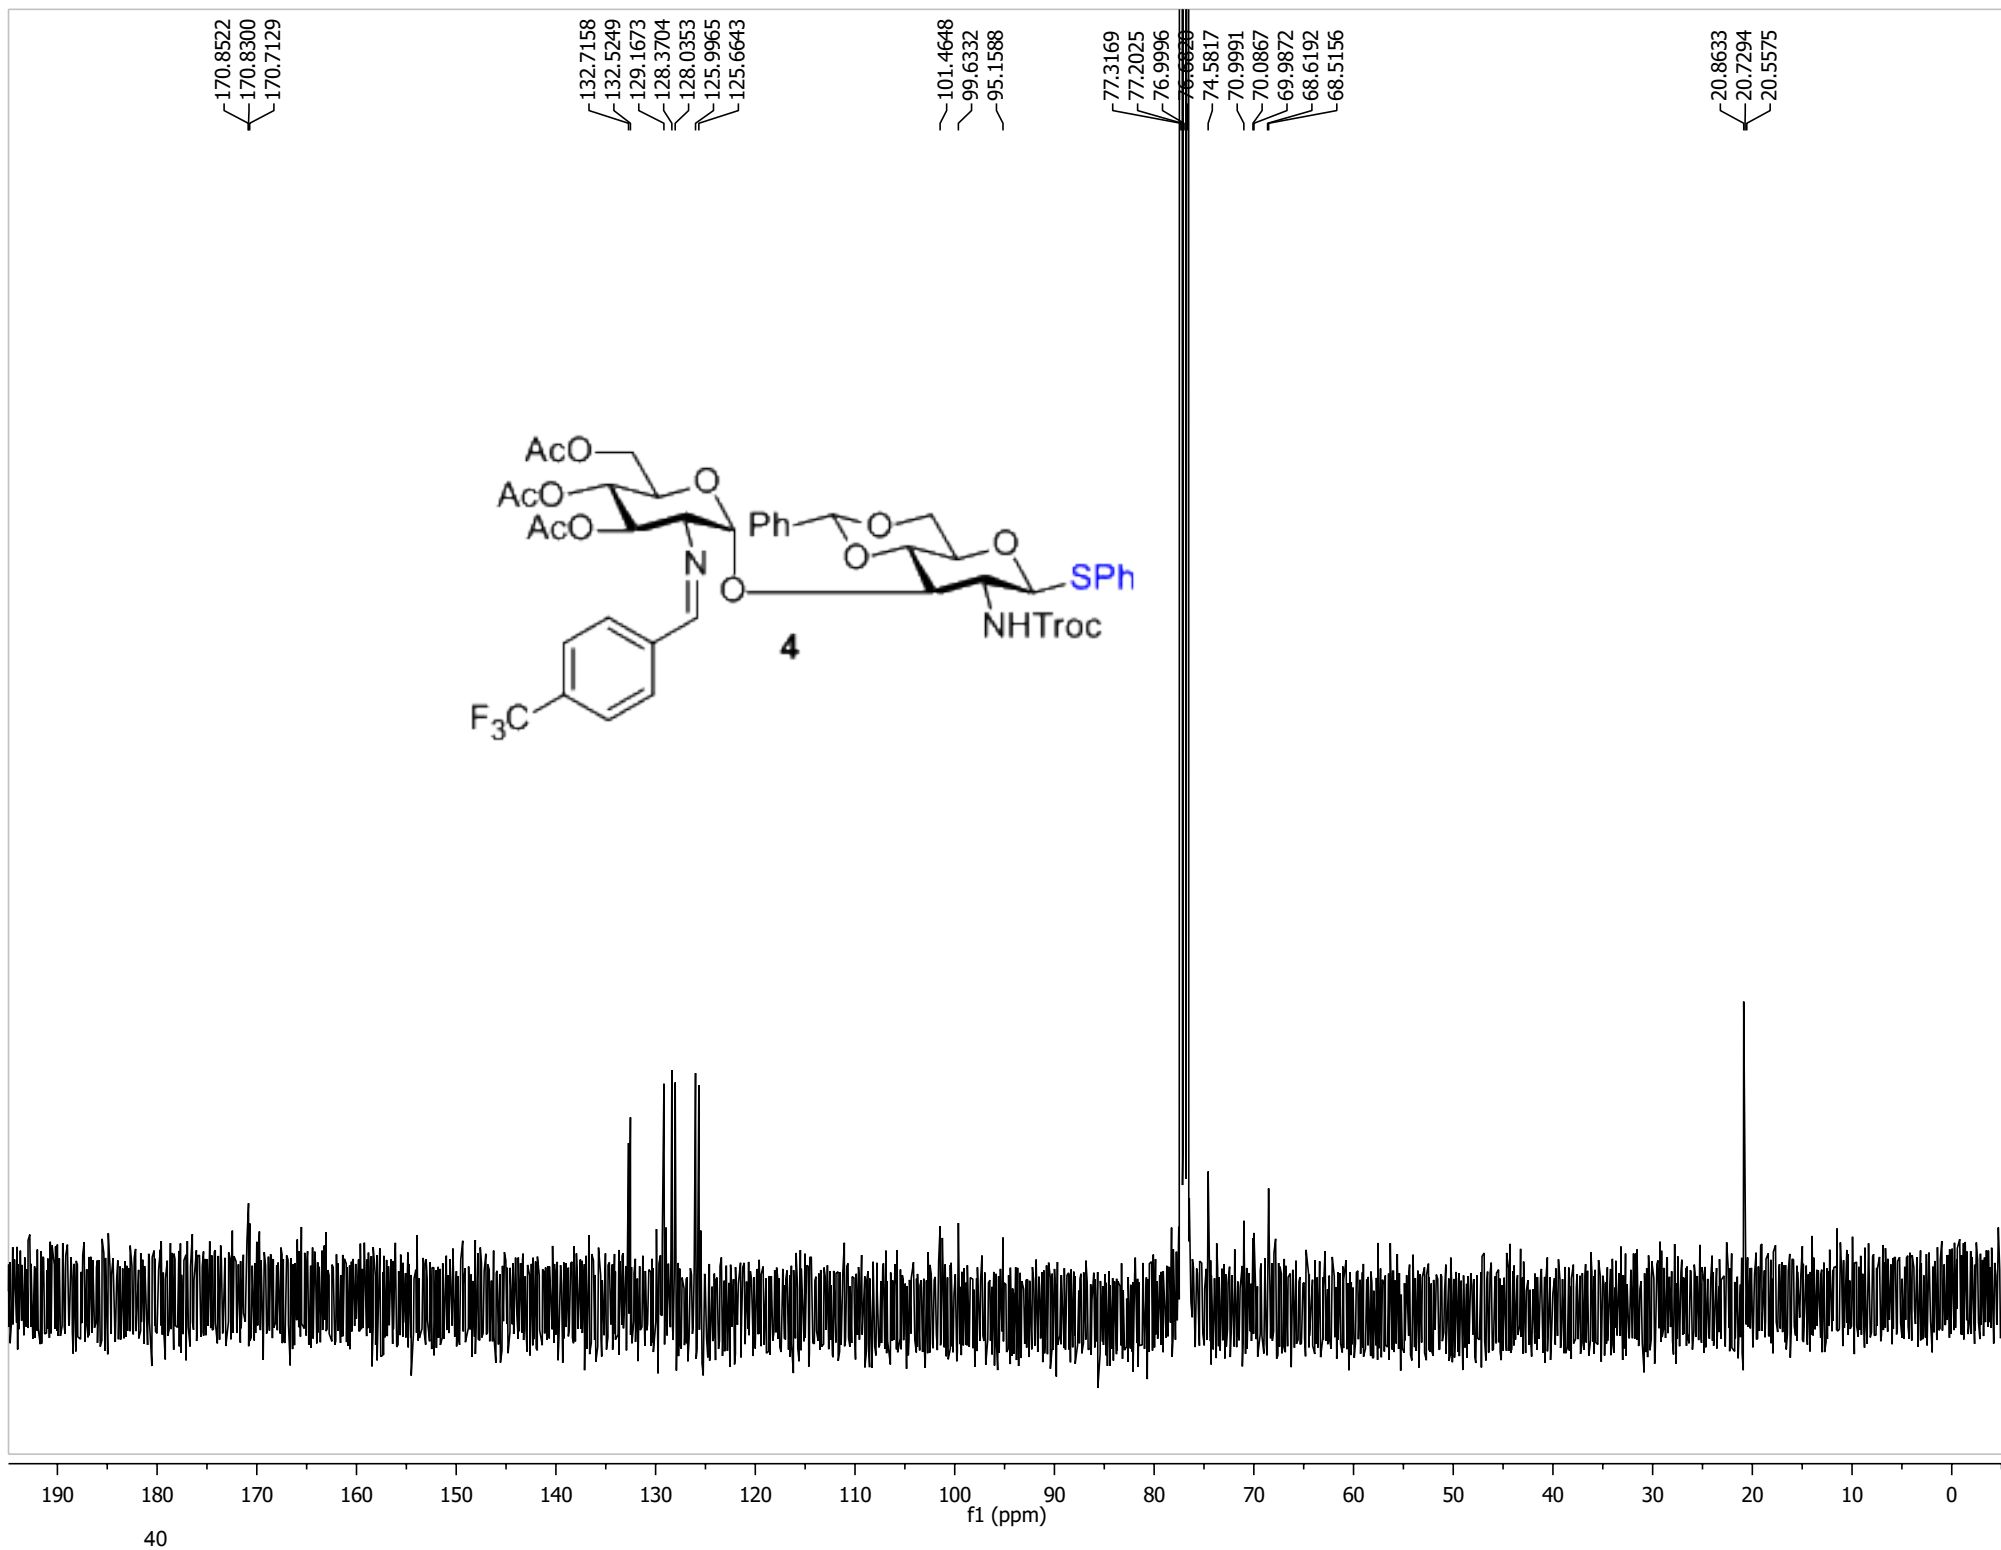



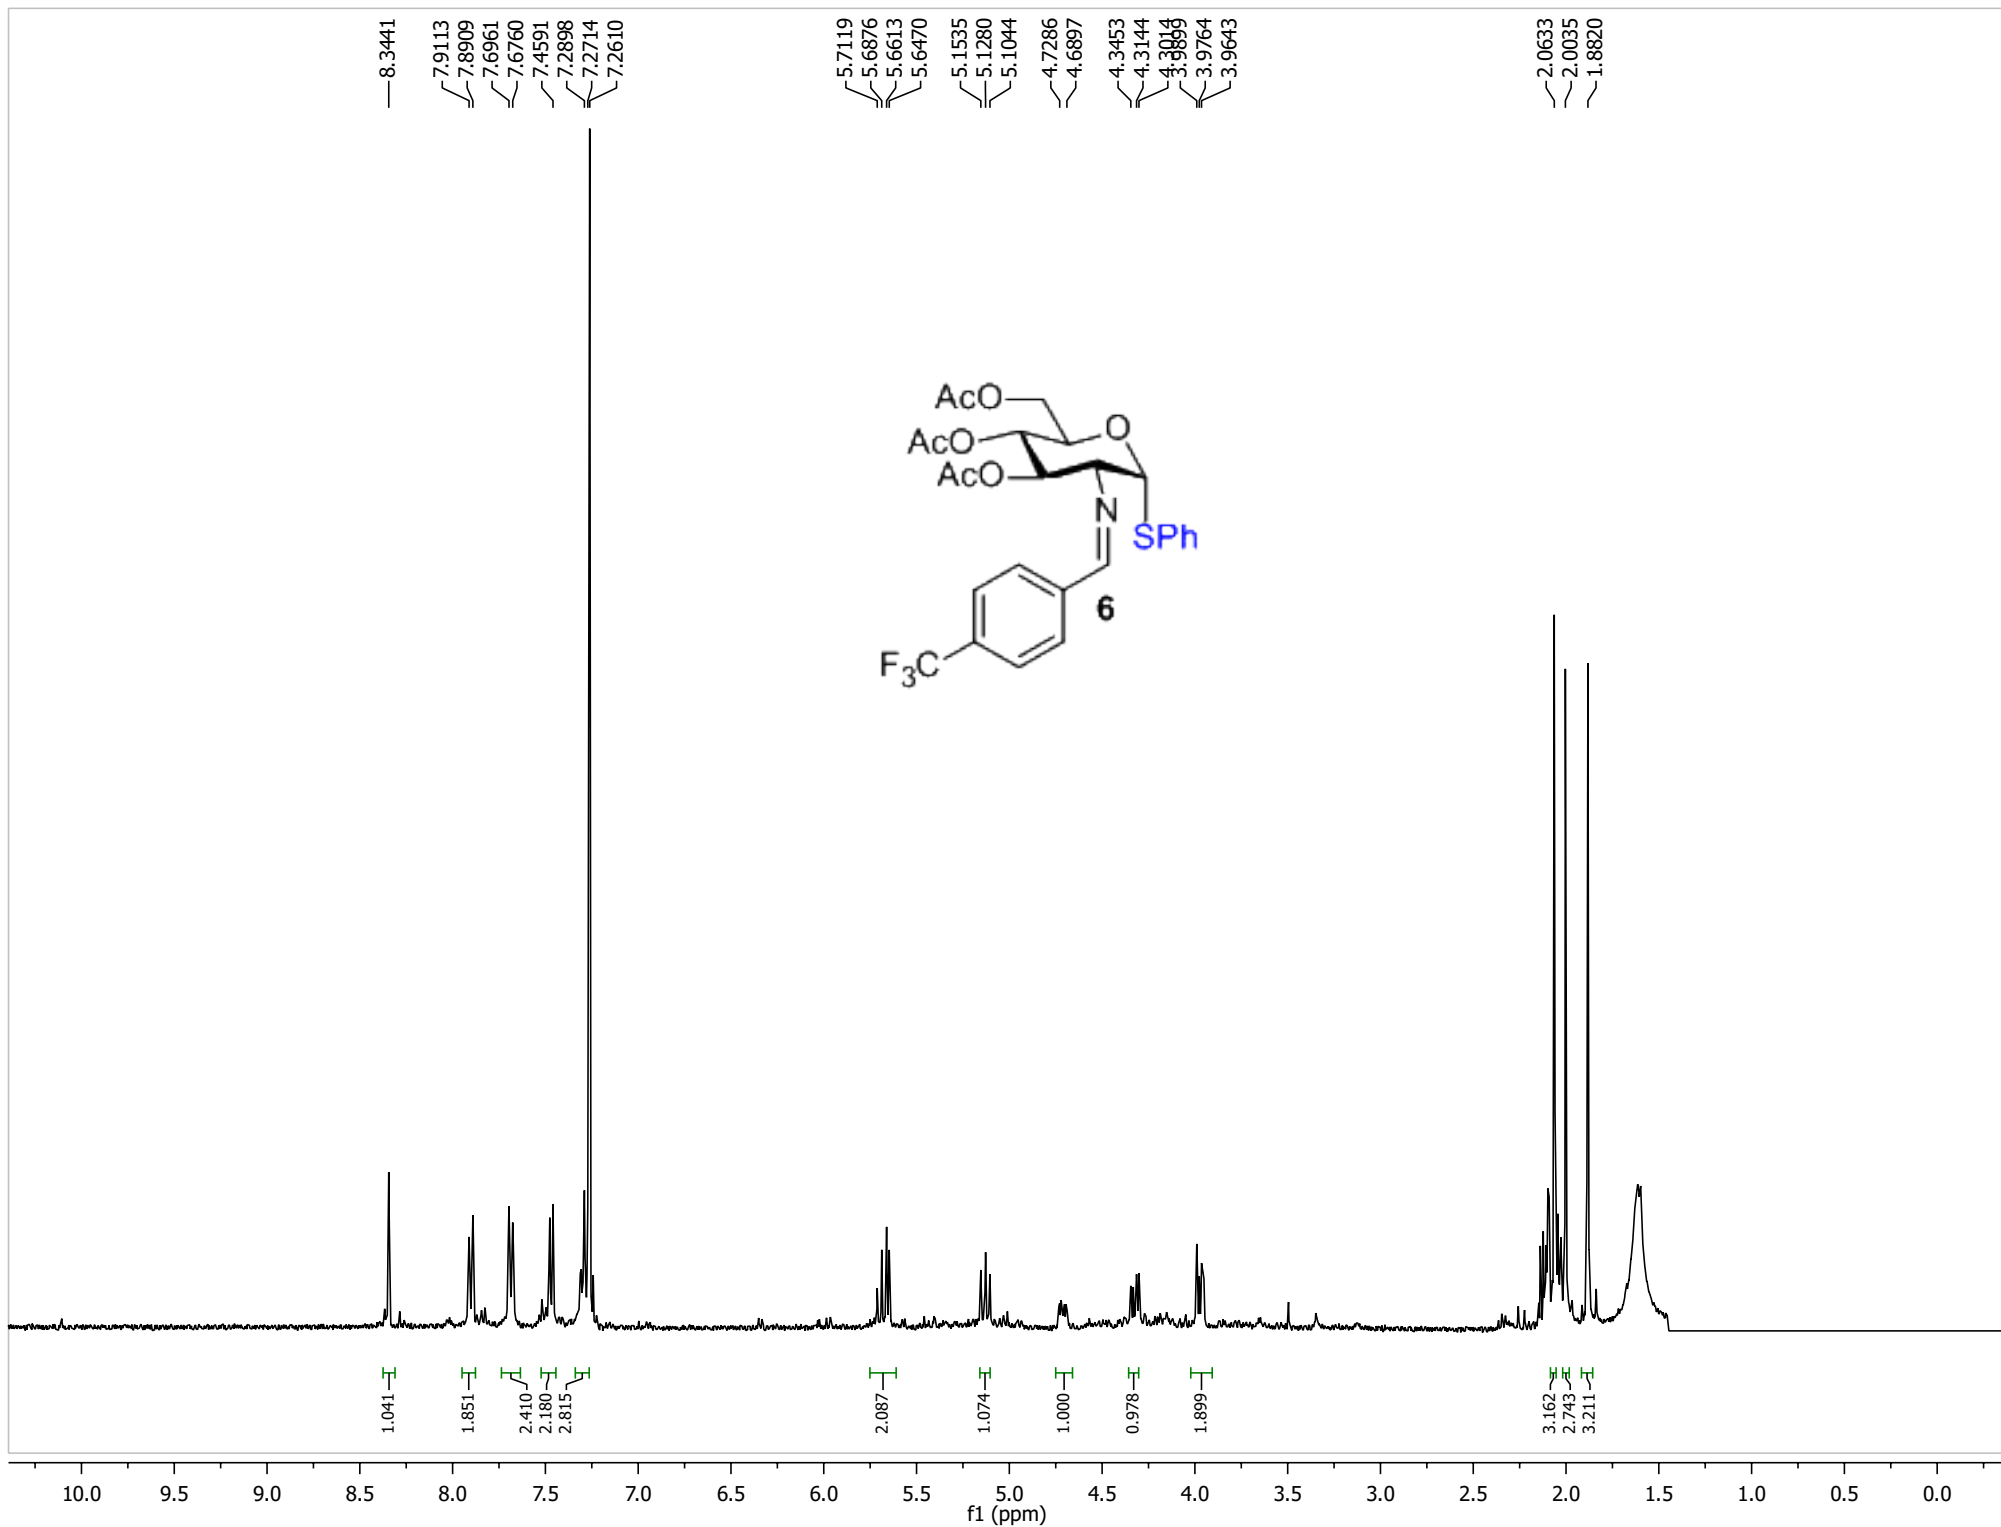

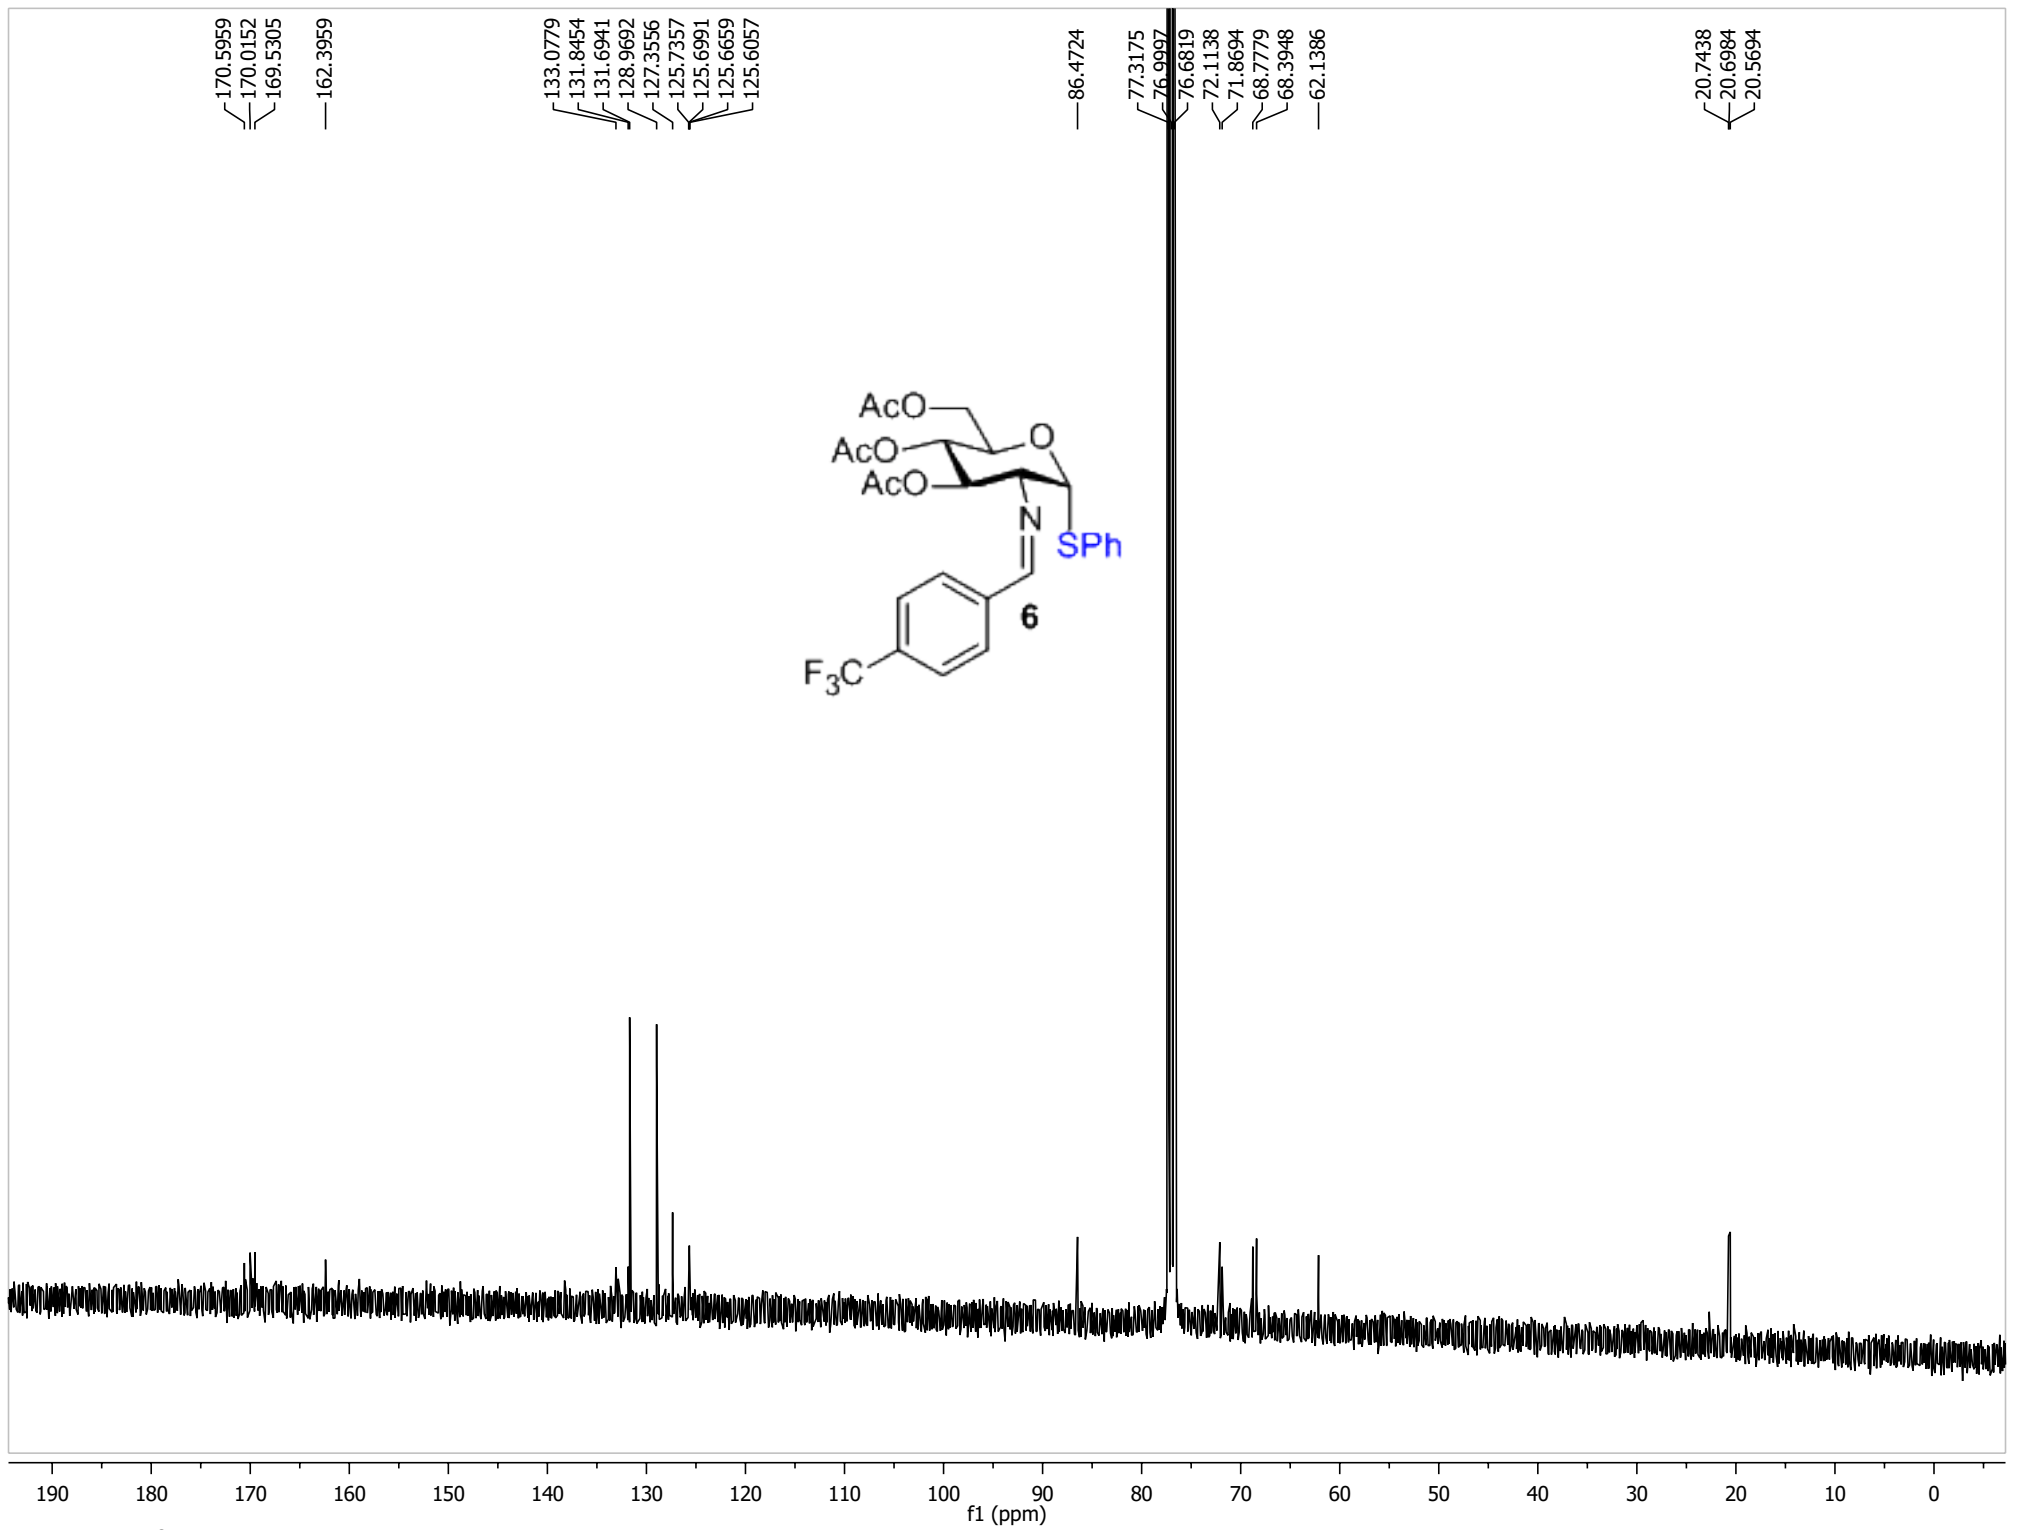

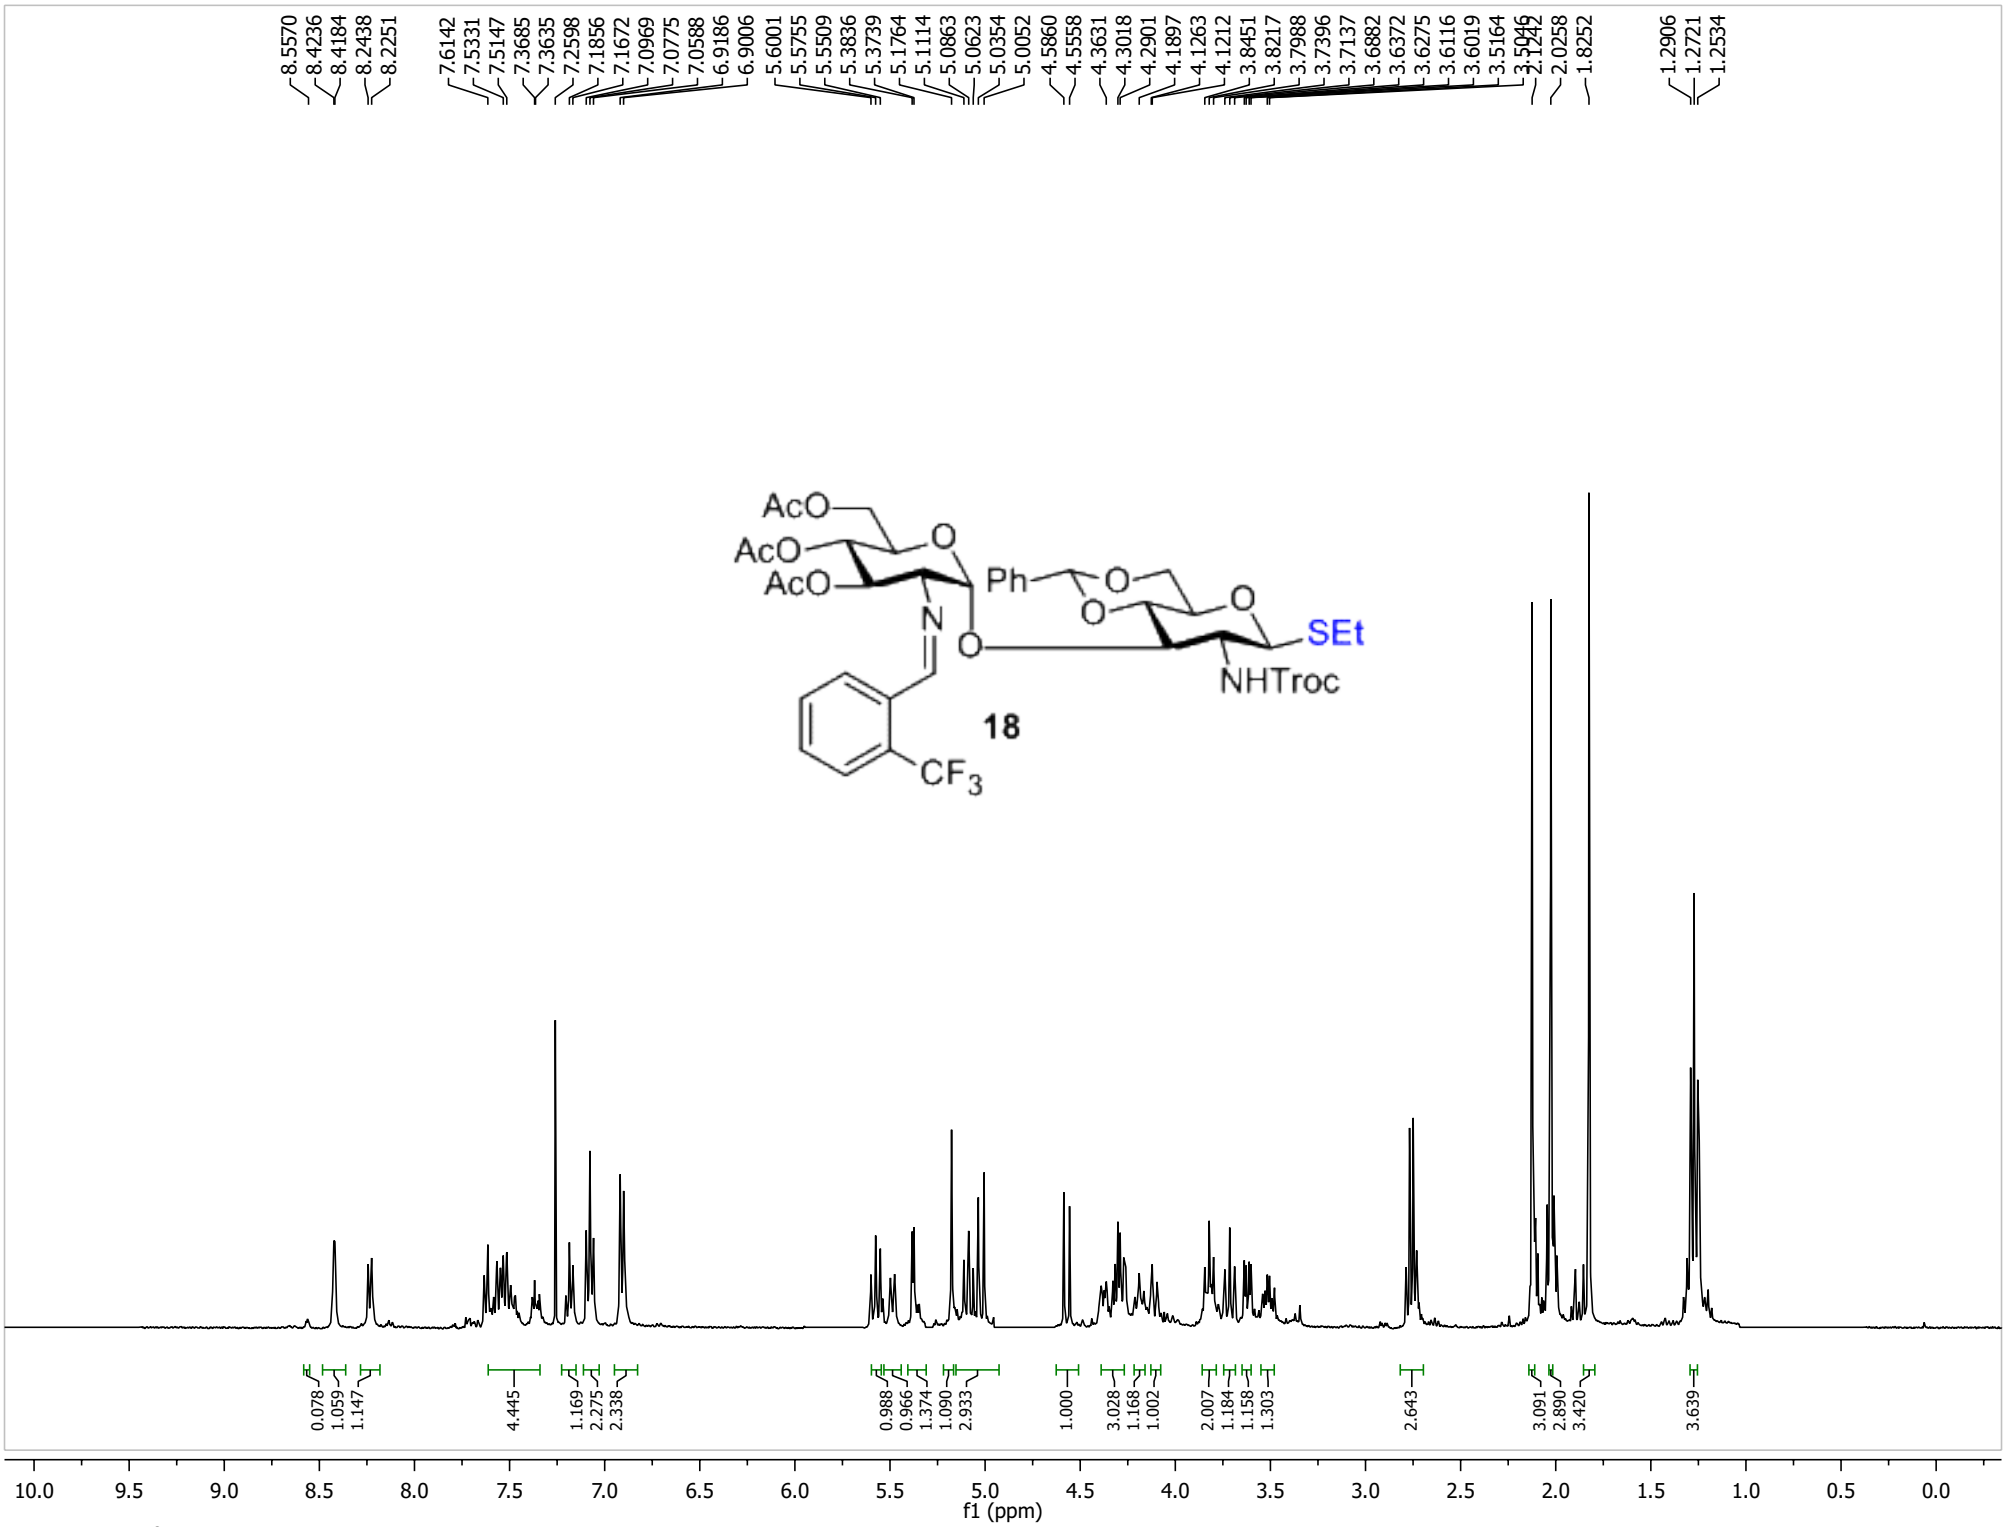

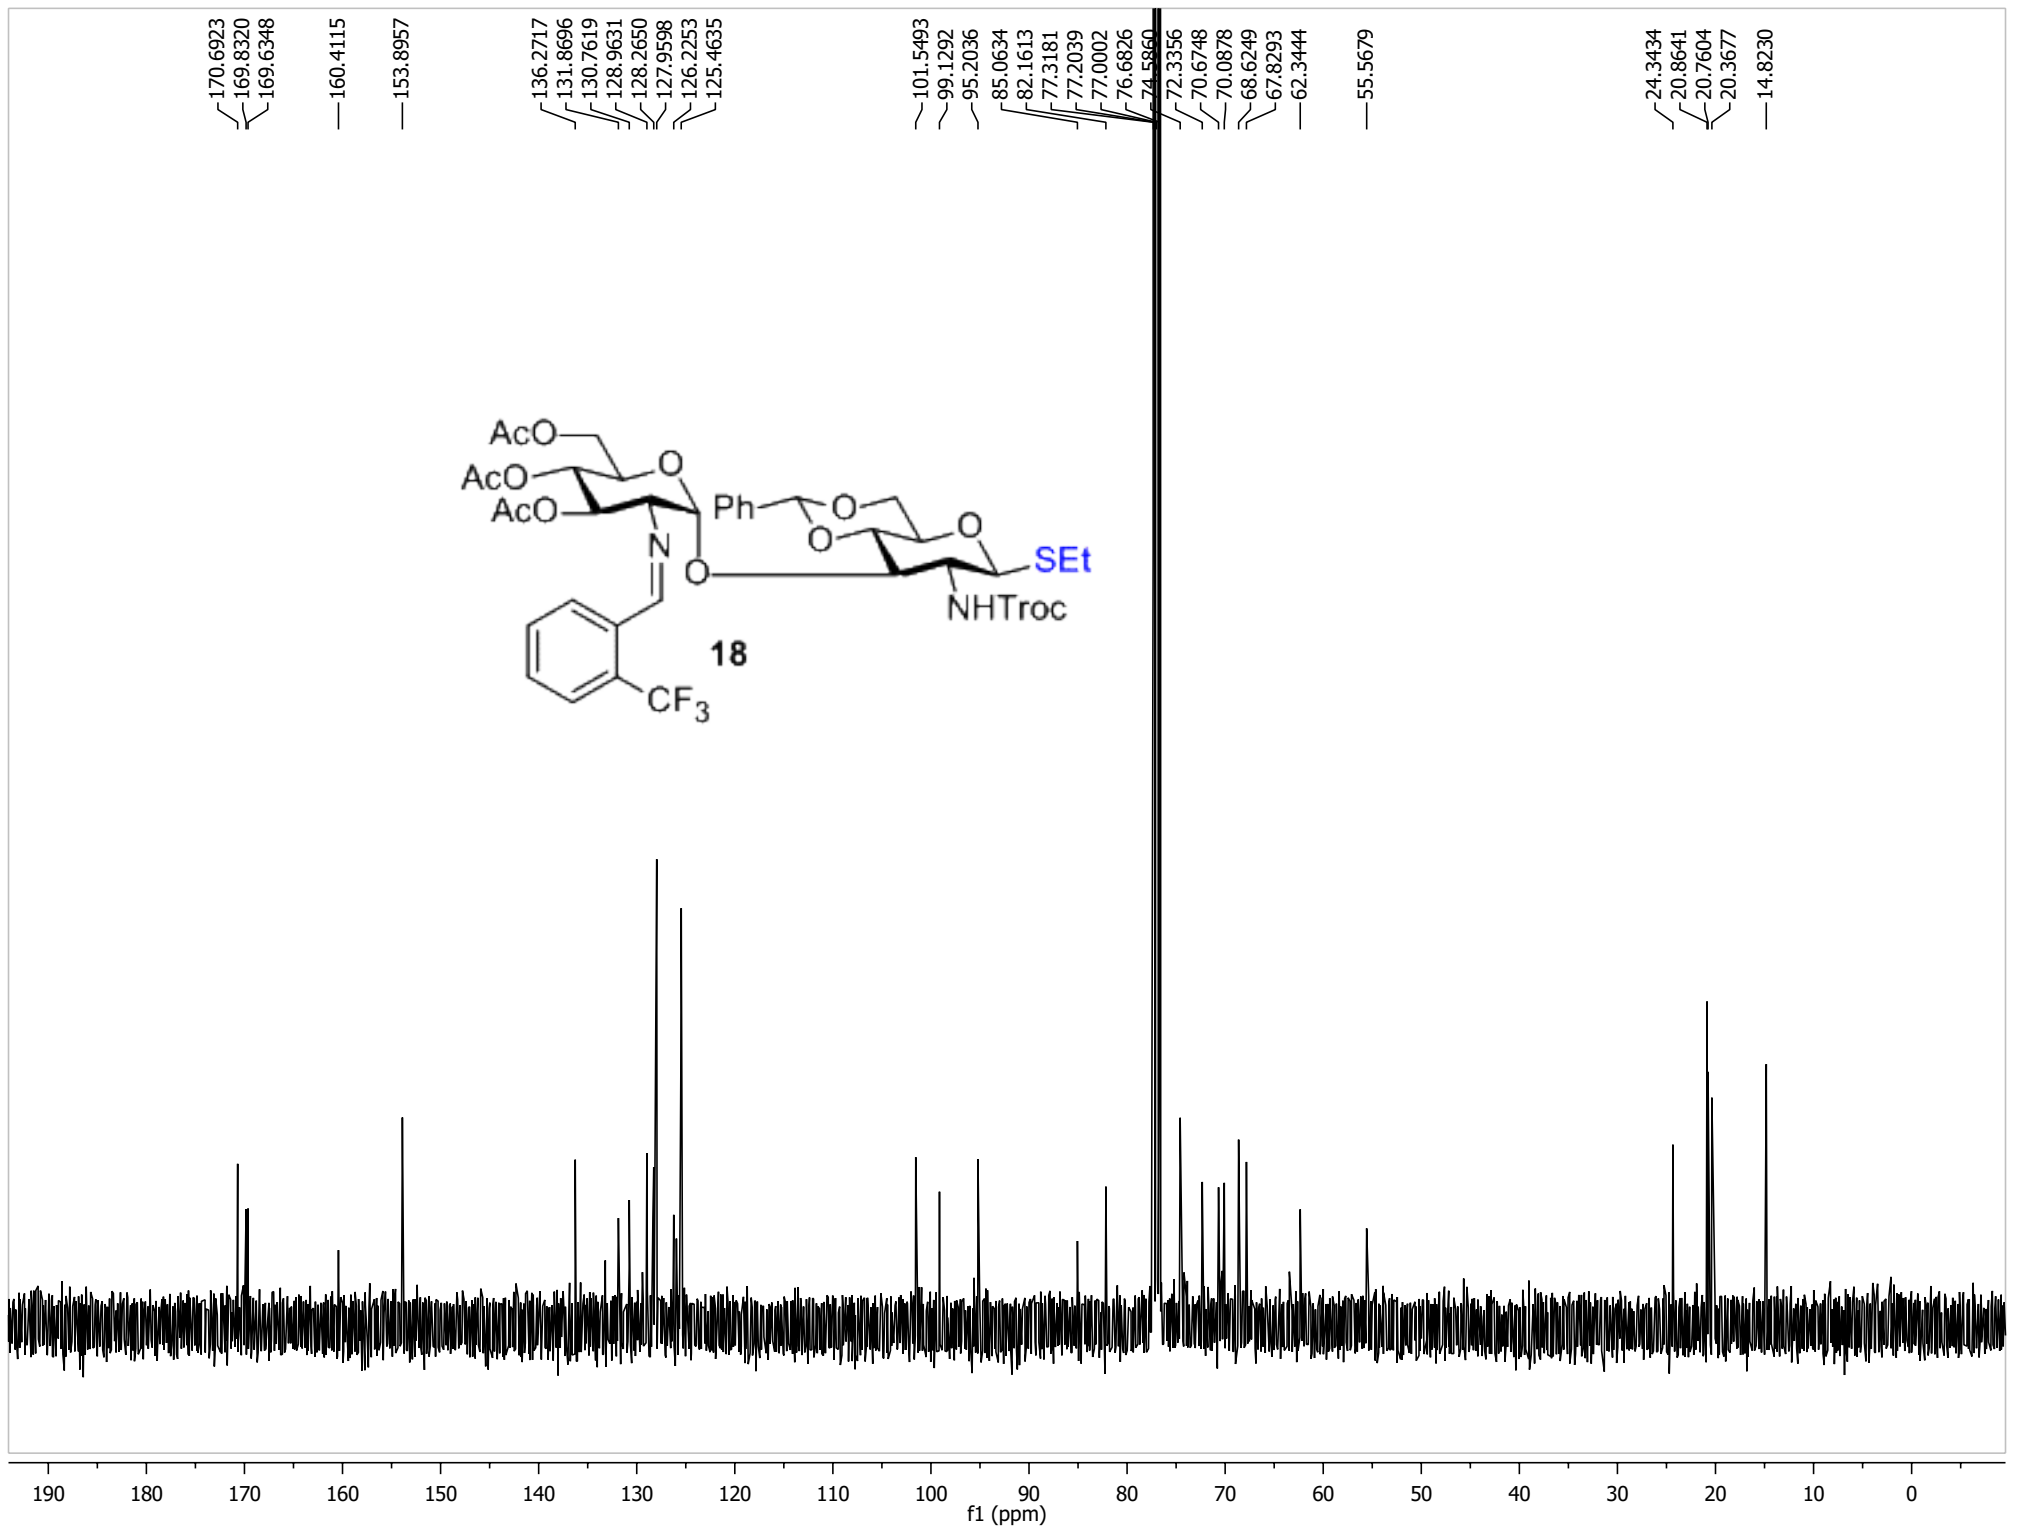

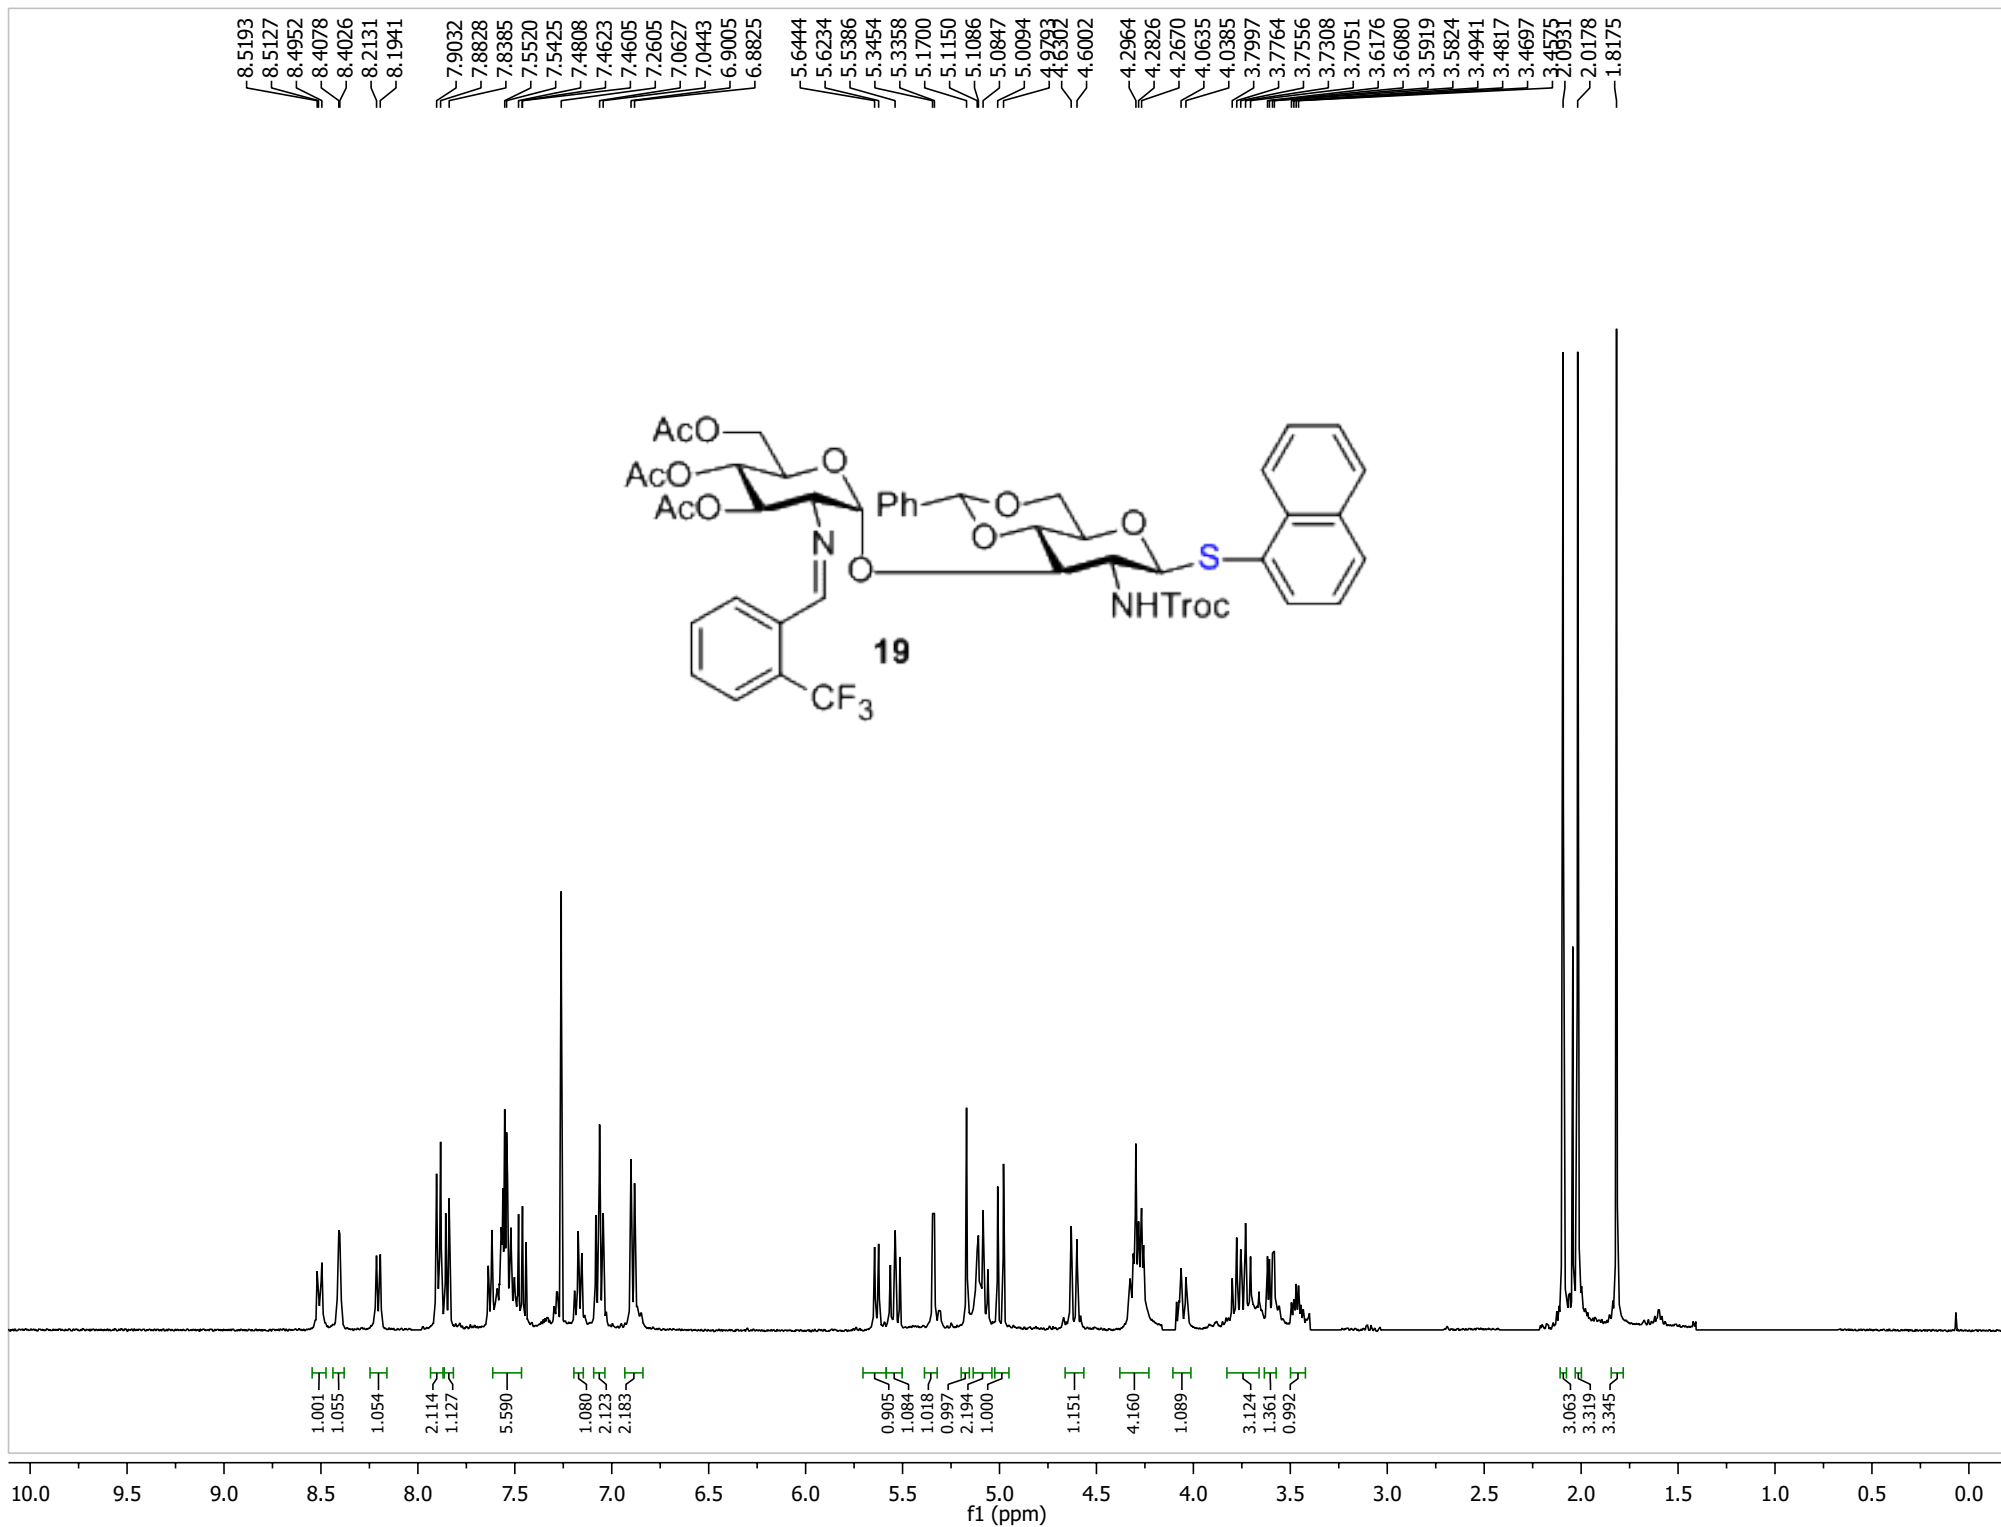

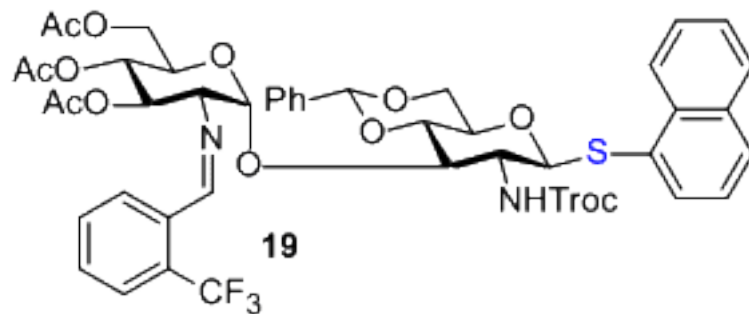

170.6758  
169.7679  
169.6886

160.4784

153.7391

136.2541  
134.1122  
133.1905  
131.8561  
130.7537  
129.7189  
128.9423  
128.7088  
128.2632  
127.9400  
126.9042  
126.4325  
125.6775  
125.4725

101.5246  
99.0744  
95.1401

82.0932  
77.3178  
77.2051  
76.9999  
76.6822  
76.2656  
76.0600

72.2877  
70.6324  
70.0173  
68.5547  
67.8209  
62.0886  
55.8375

20.8081  
20.7439  
20.3553

190 180 170 160 150 140 130 120 110 100 90 80 70 60 50 40 30 20 10 0

f1 (ppm)

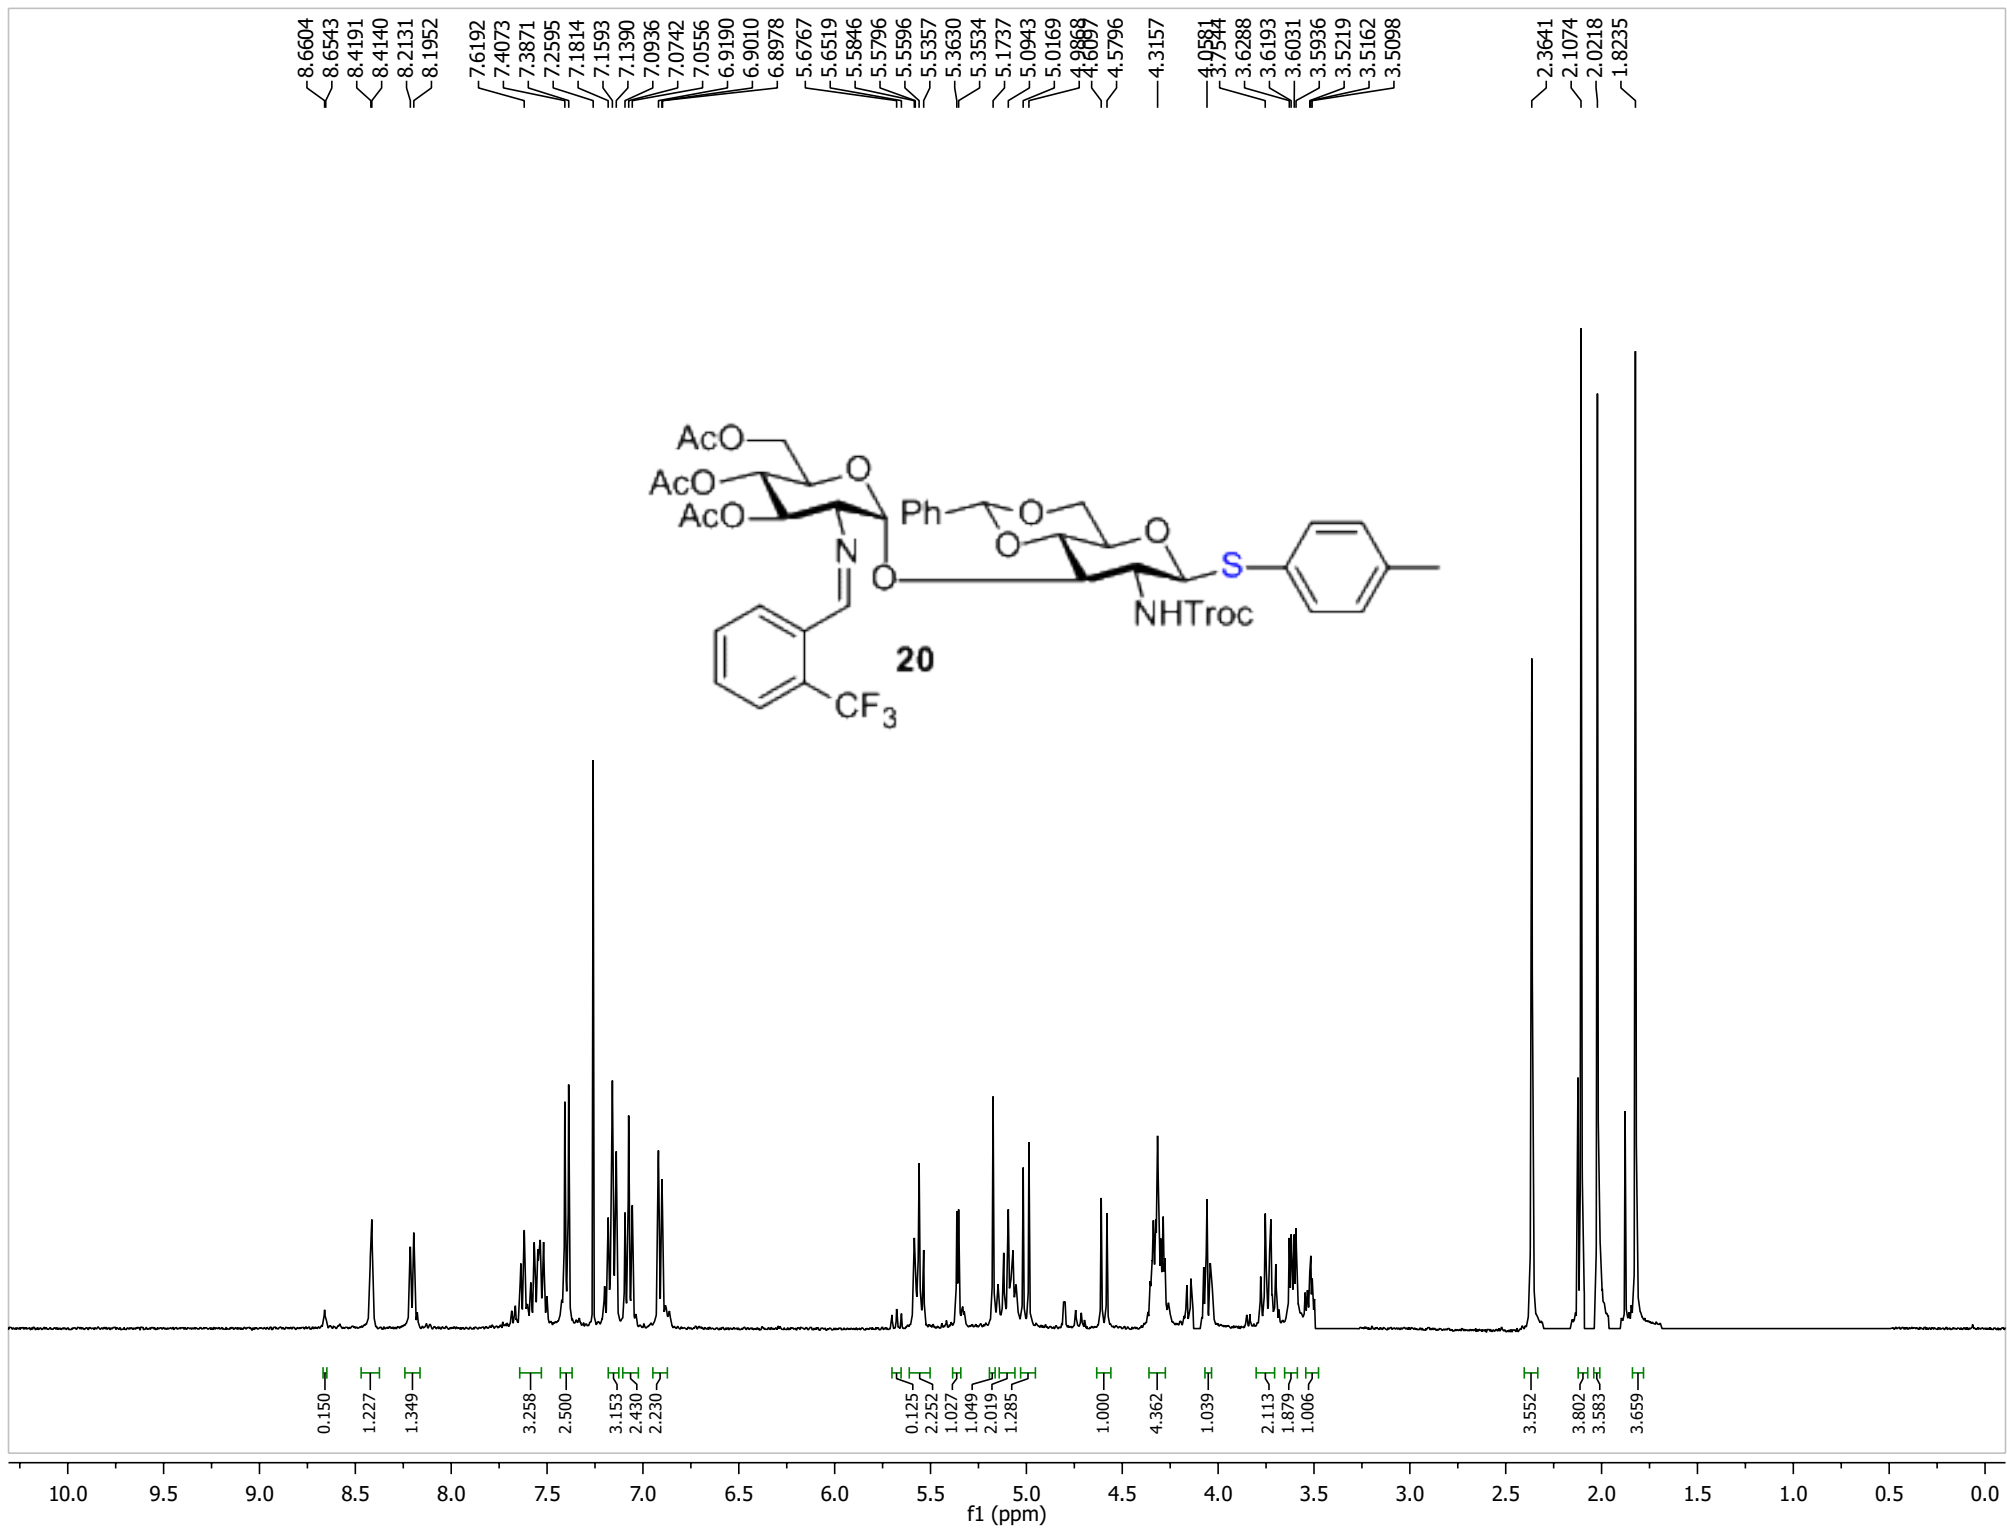

170.7243  
169.7776  
169.7298

160.5345

153.7066

138.6455  
136.2760  
133.2218  
130.7647  
129.9470  
128.9548  
128.2717  
127.9556  
125.4865

101.5316  
99.0439  
95.1635

82.0645  
77.3181  
77.2031  
77.0002  
76.6823  
76.2886  
74.6433

72.3127  
70.6412  
70.0378  
68.5948  
67.8402  
62.0764

55.6294

21.1989  
20.8270  
20.7496  
20.3726

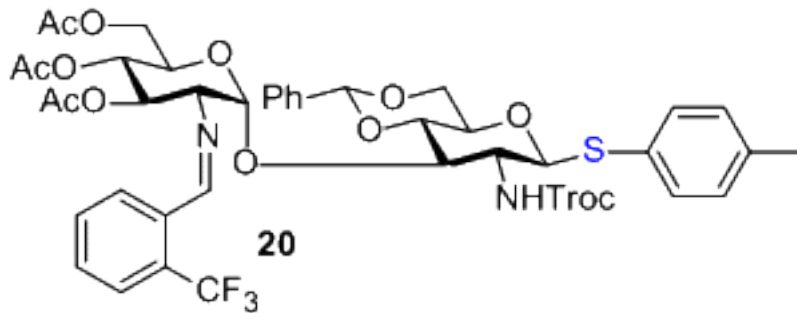

20

190 180 170 160 150 140 130 120 110 100 90 80 70 60 50 40 30 20 10 0

f1 (ppm)



8.5109  
8.4164  
8.4115  
8.2043  
8.1860  
7.6132  
7.6107  
7.4780  
7.4560  
7.2596  
7.1764  
7.0887  
7.0694  
7.0508  
6.9158  
6.8973  
6.8939  
6.8898  
6.8676  
5.5831  
5.5745  
5.5589  
5.5340  
5.3561  
5.3466  
5.1213  
5.0965  
5.0723  
5.0153  
4.9851  
4.6376  
4.6044  
4.3171  
4.0737  
4.0703  
3.8311  
3.8071  
3.7902  
3.7180  
3.6268  
3.6173  
3.6012  
3.5917  
3.5112  
3.4990  
3.4871  
3.4750  
3.4626  
2.1116  
2.0221  
1.8216

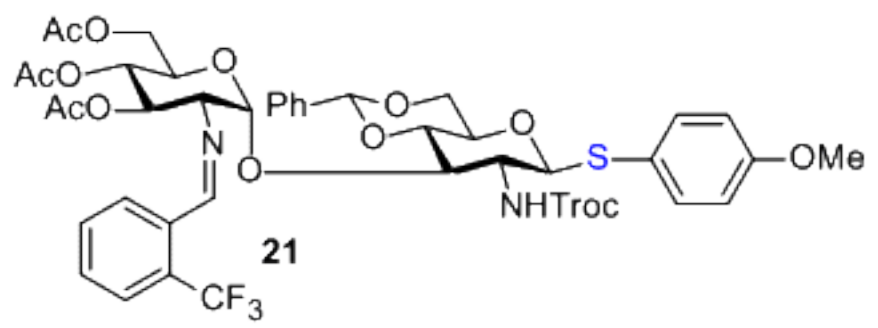

0.076  
1.087  
1.166  
5.449  
1.044  
2.301  
4.108

2.347  
1.169  
1.073  
1.116  
2.062  
1.000  
4.350  
1.236  
3.424  
3.084  
1.340  
1.116

3.170  
2.686  
3.377

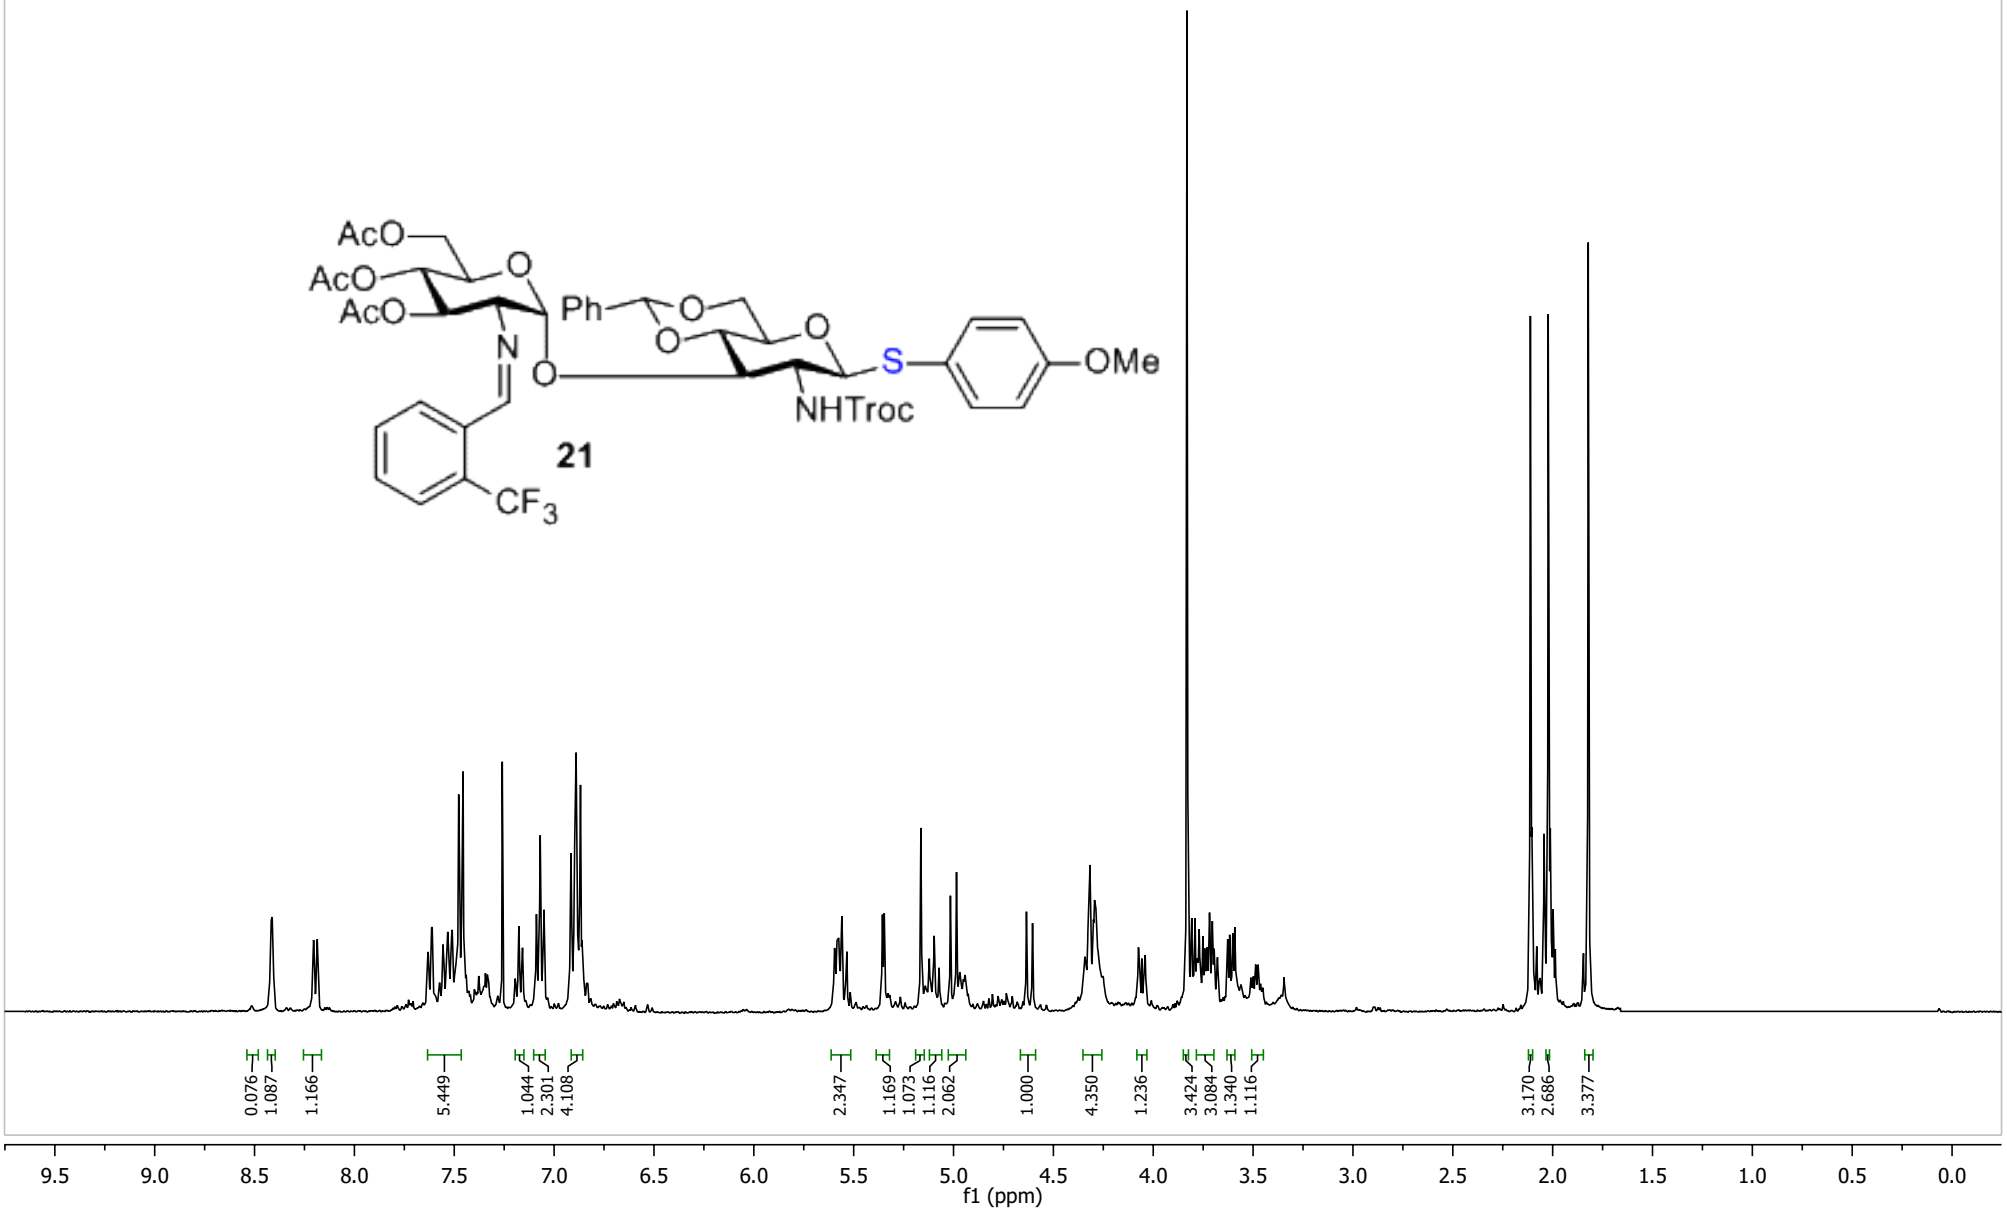

170.7228  
169.7680  
169.7115

160.2219

153.6894

136.2710  
135.8633  
131.8466  
130.7428  
128.9389  
128.2626  
127.9435  
127.1477  
125.4739  
121.6186  
114.6510

101.4926  
99.0434  
95.1851

87.1379

77.3179  
77.0003  
76.6829

74.6107  
72.3124  
70.6464  
69.9894  
68.5851  
67.8192  
67.0556

55.5283  
55.3288

20.8227  
20.7426  
20.3622

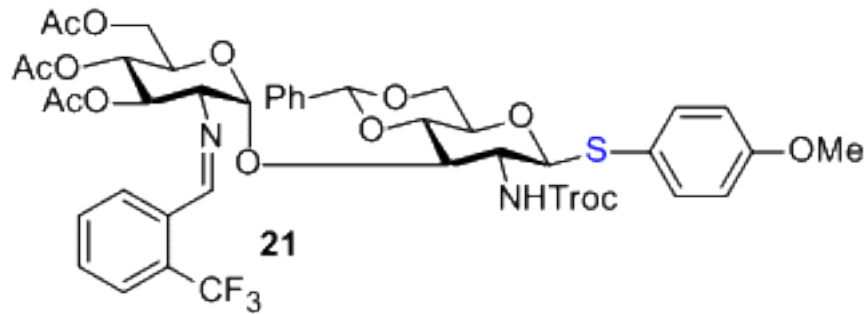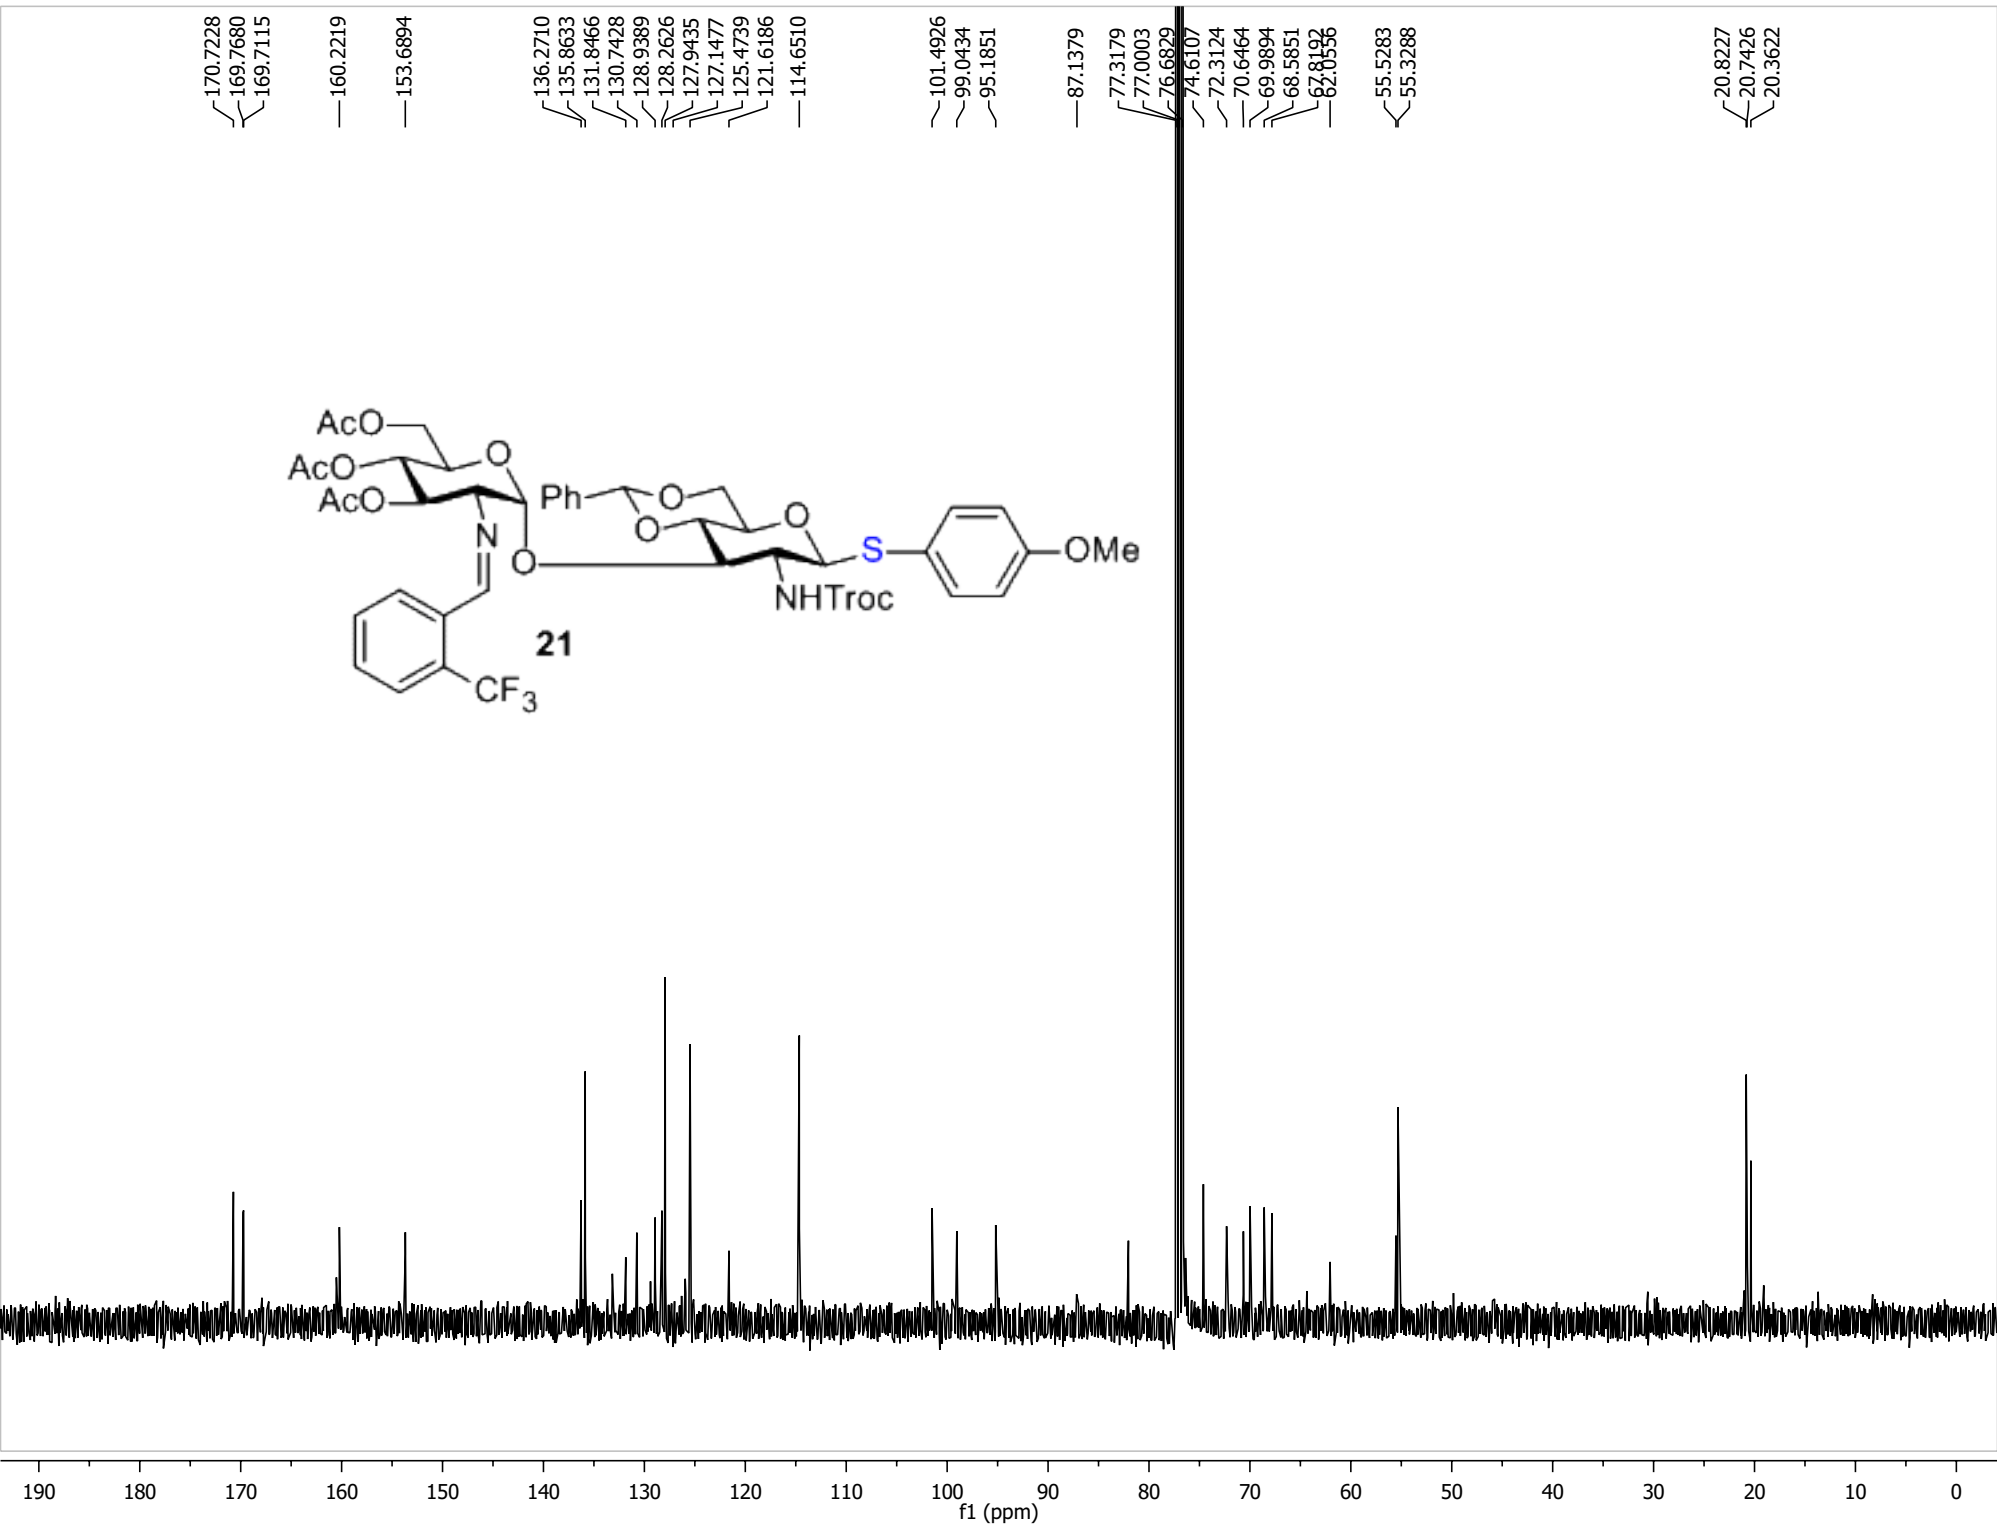

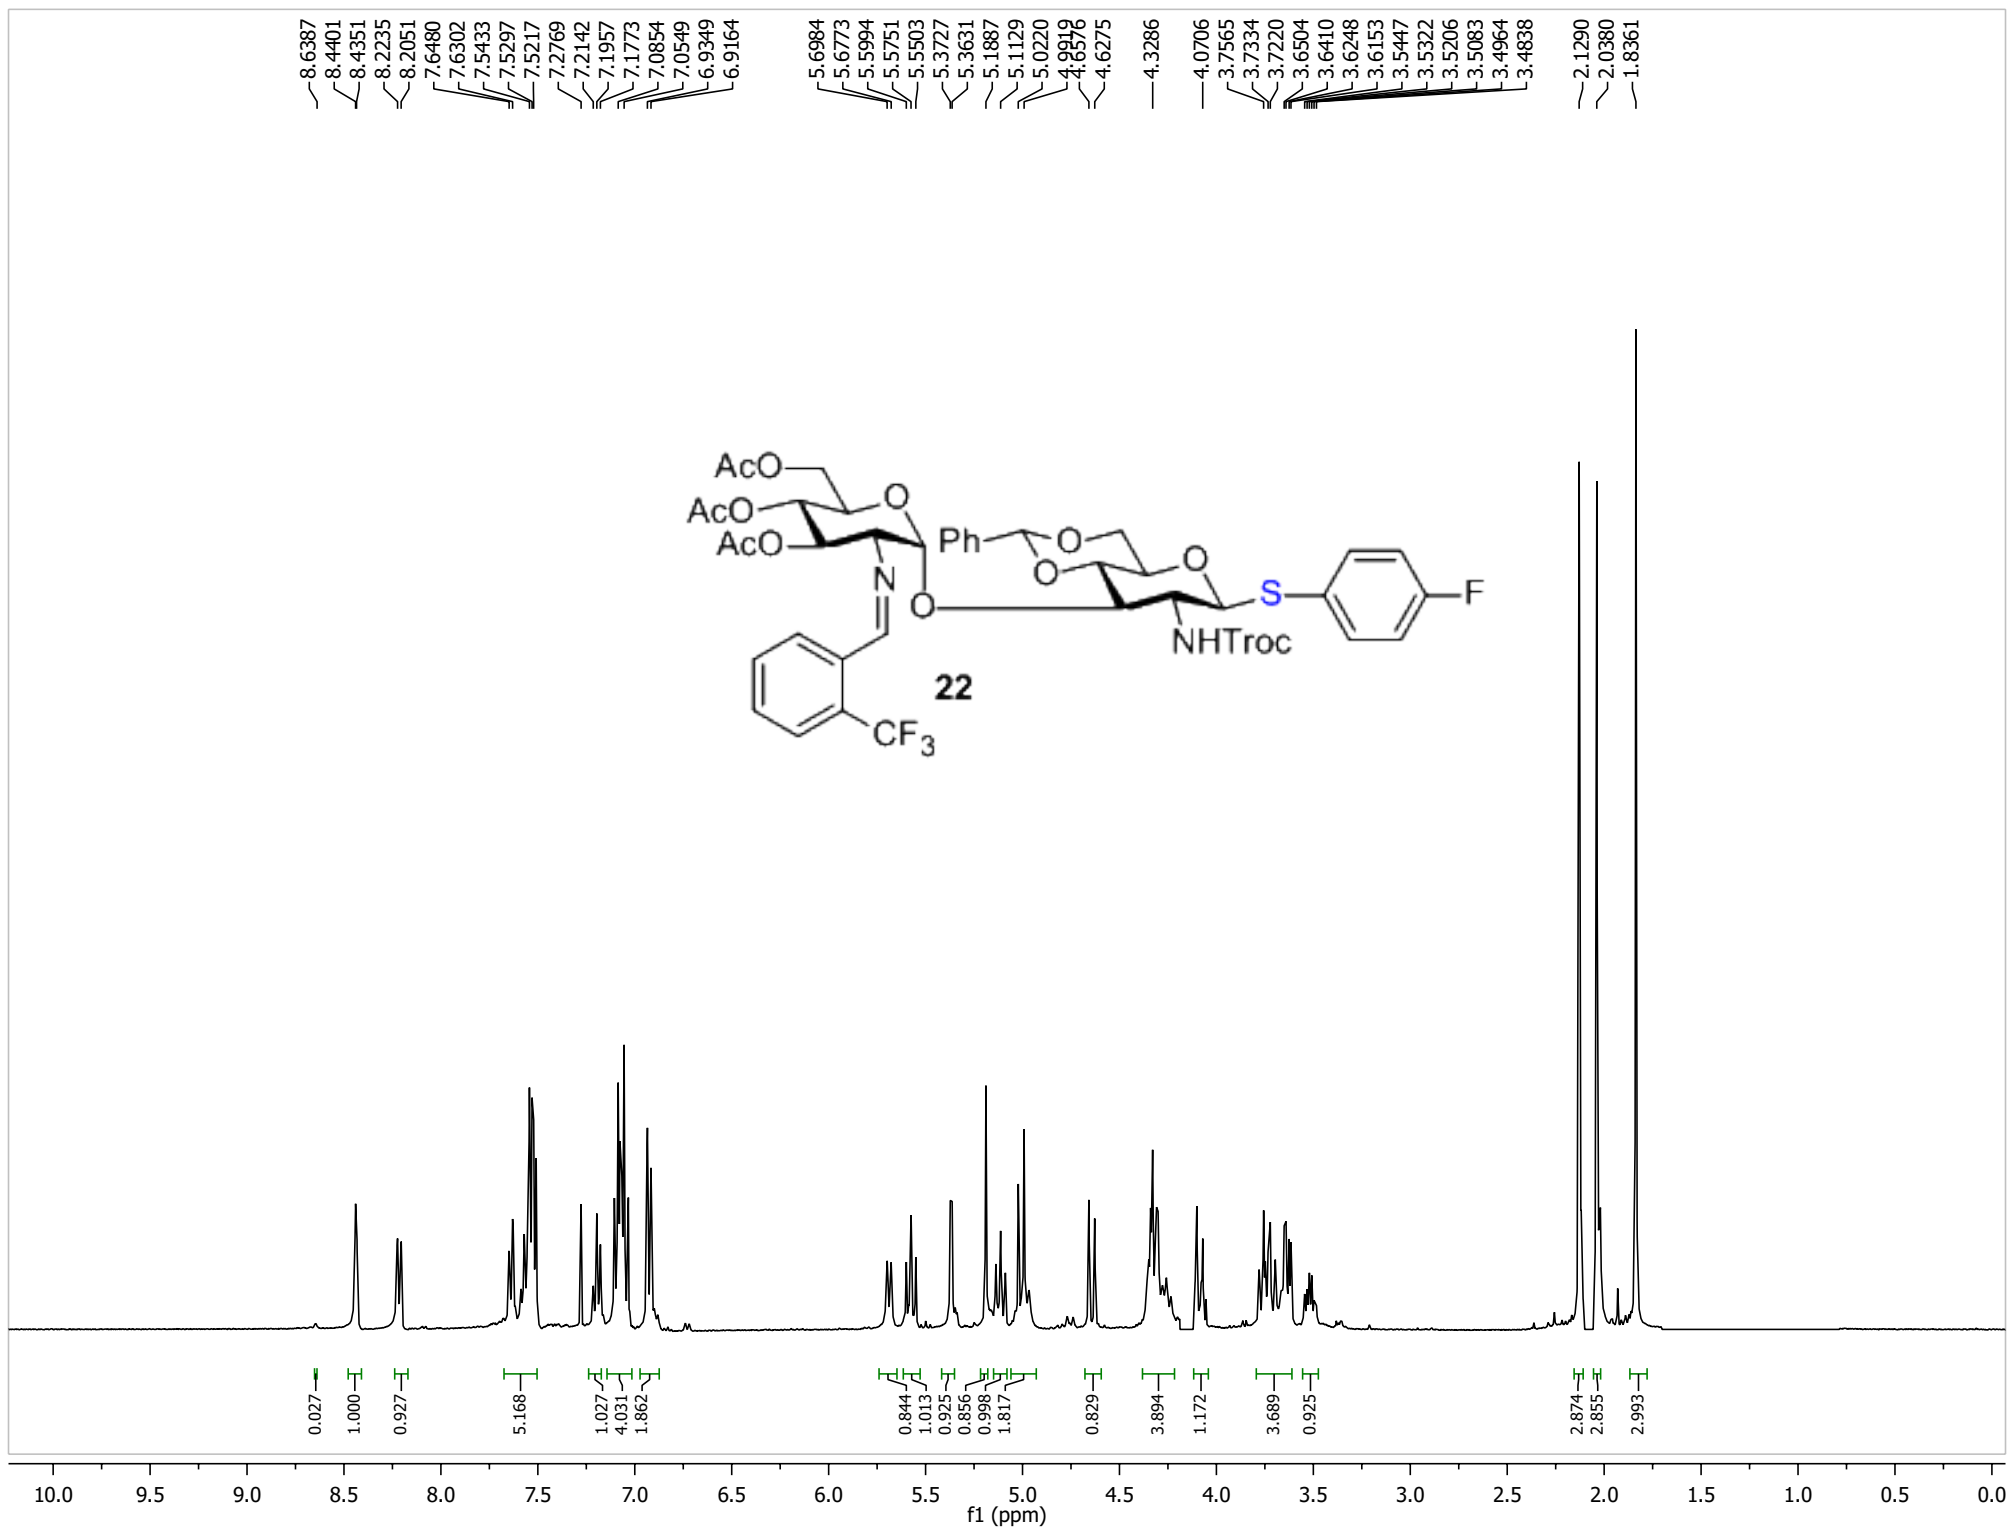

170.7335  
169.7594  
169.6819  
164.2692  
161.7939  
160.5281

153.7294

136.2006  
135.7100  
135.6285  
133.1295  
131.8397  
130.7630  
128.9668  
128.2131  
127.9392  
125.4559  
116.3242  
116.1060

101.5030  
99.0494  
95.1649

86.9937  
81.9281  
77.3178  
76.9999  
76.6819  
74.5813  
70.5874  
69.9866  
68.5655  
67.8318  
67.0571

55.4848

20.8102  
20.7231  
20.3421

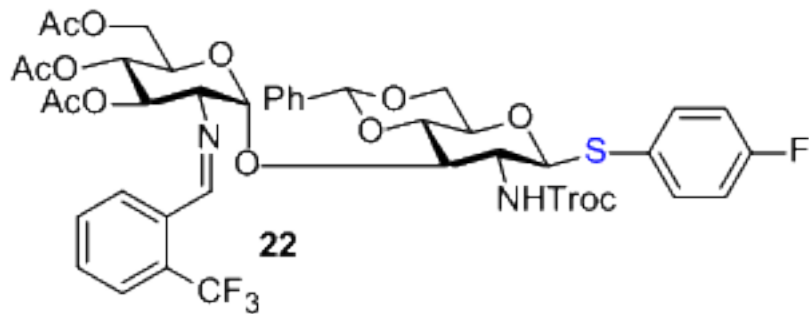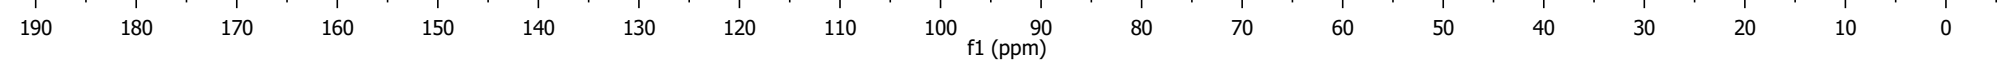

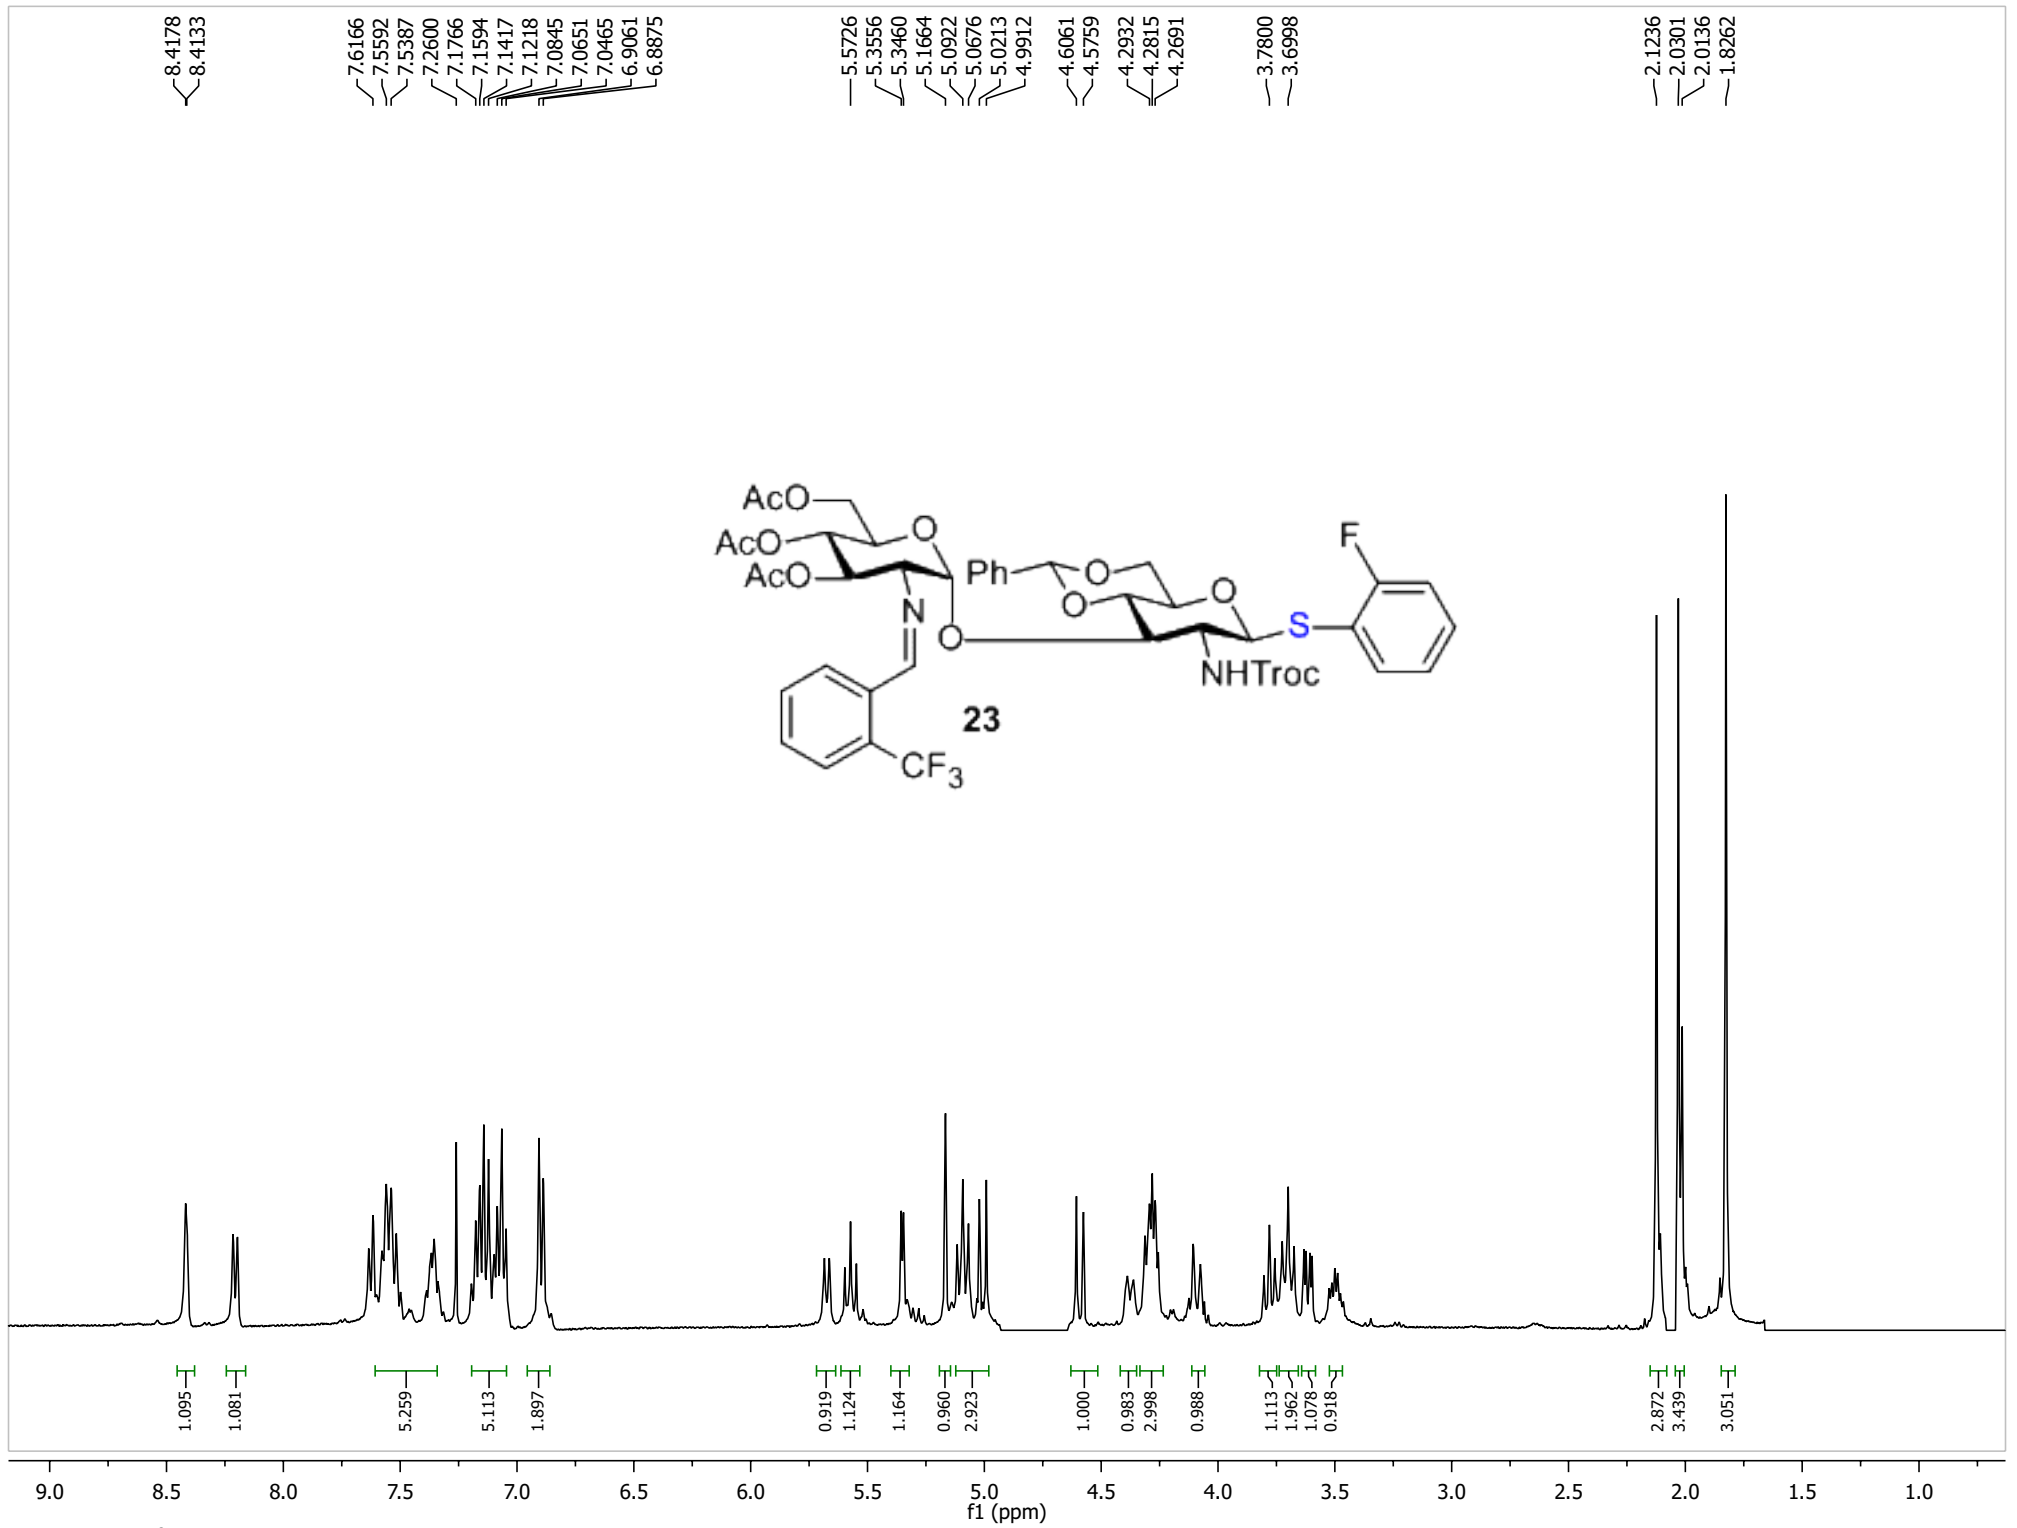

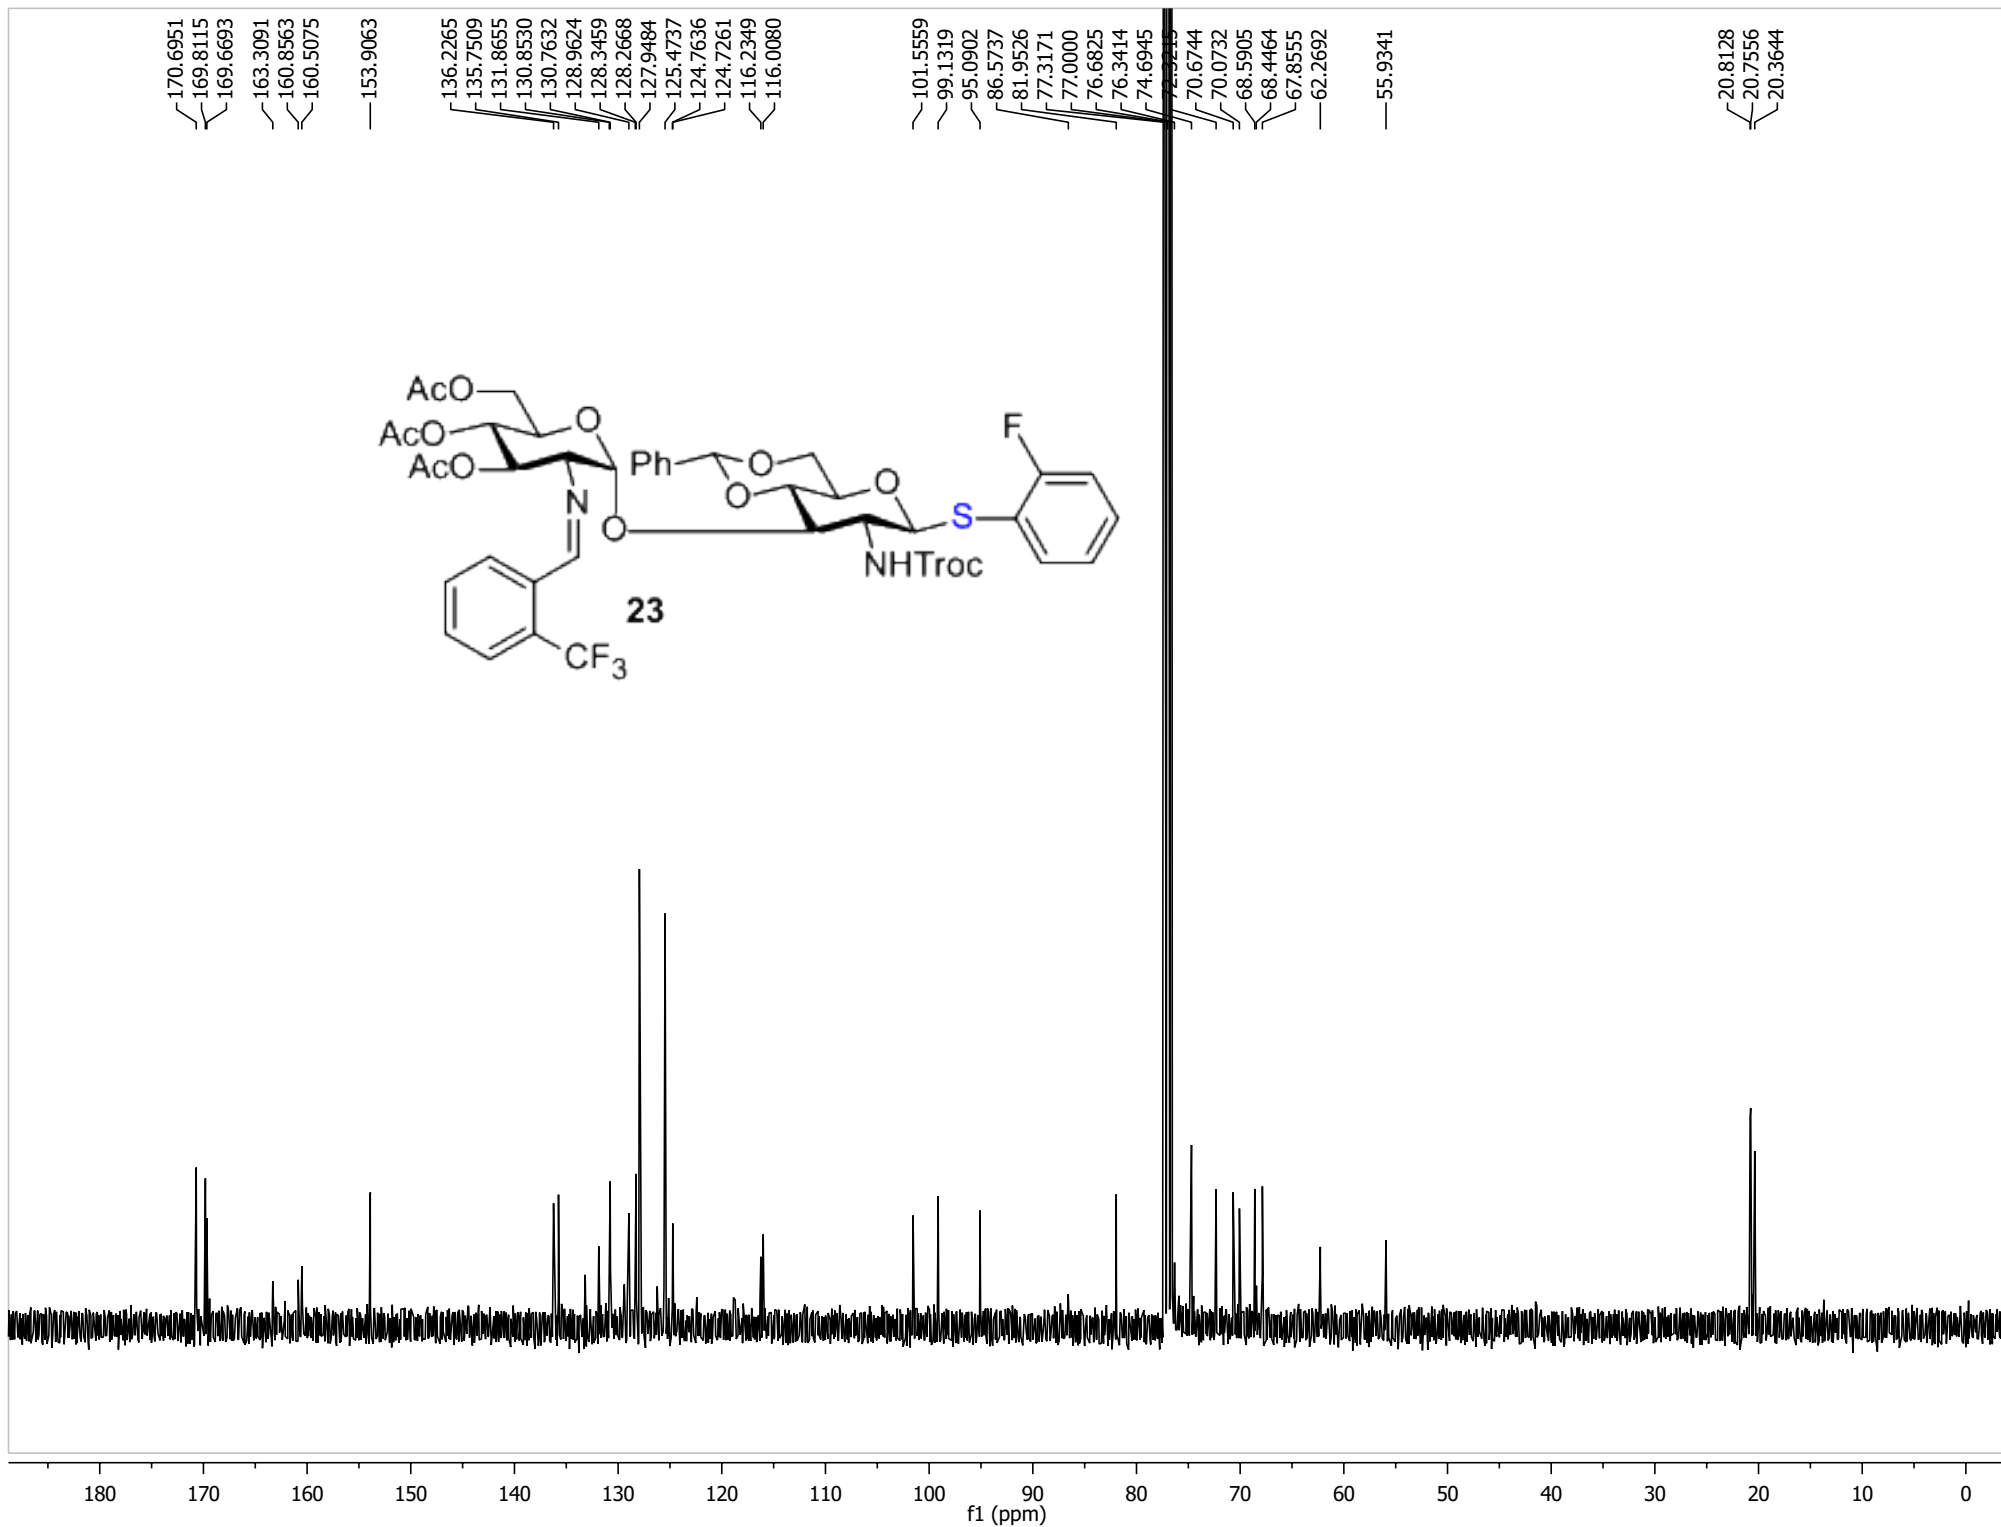

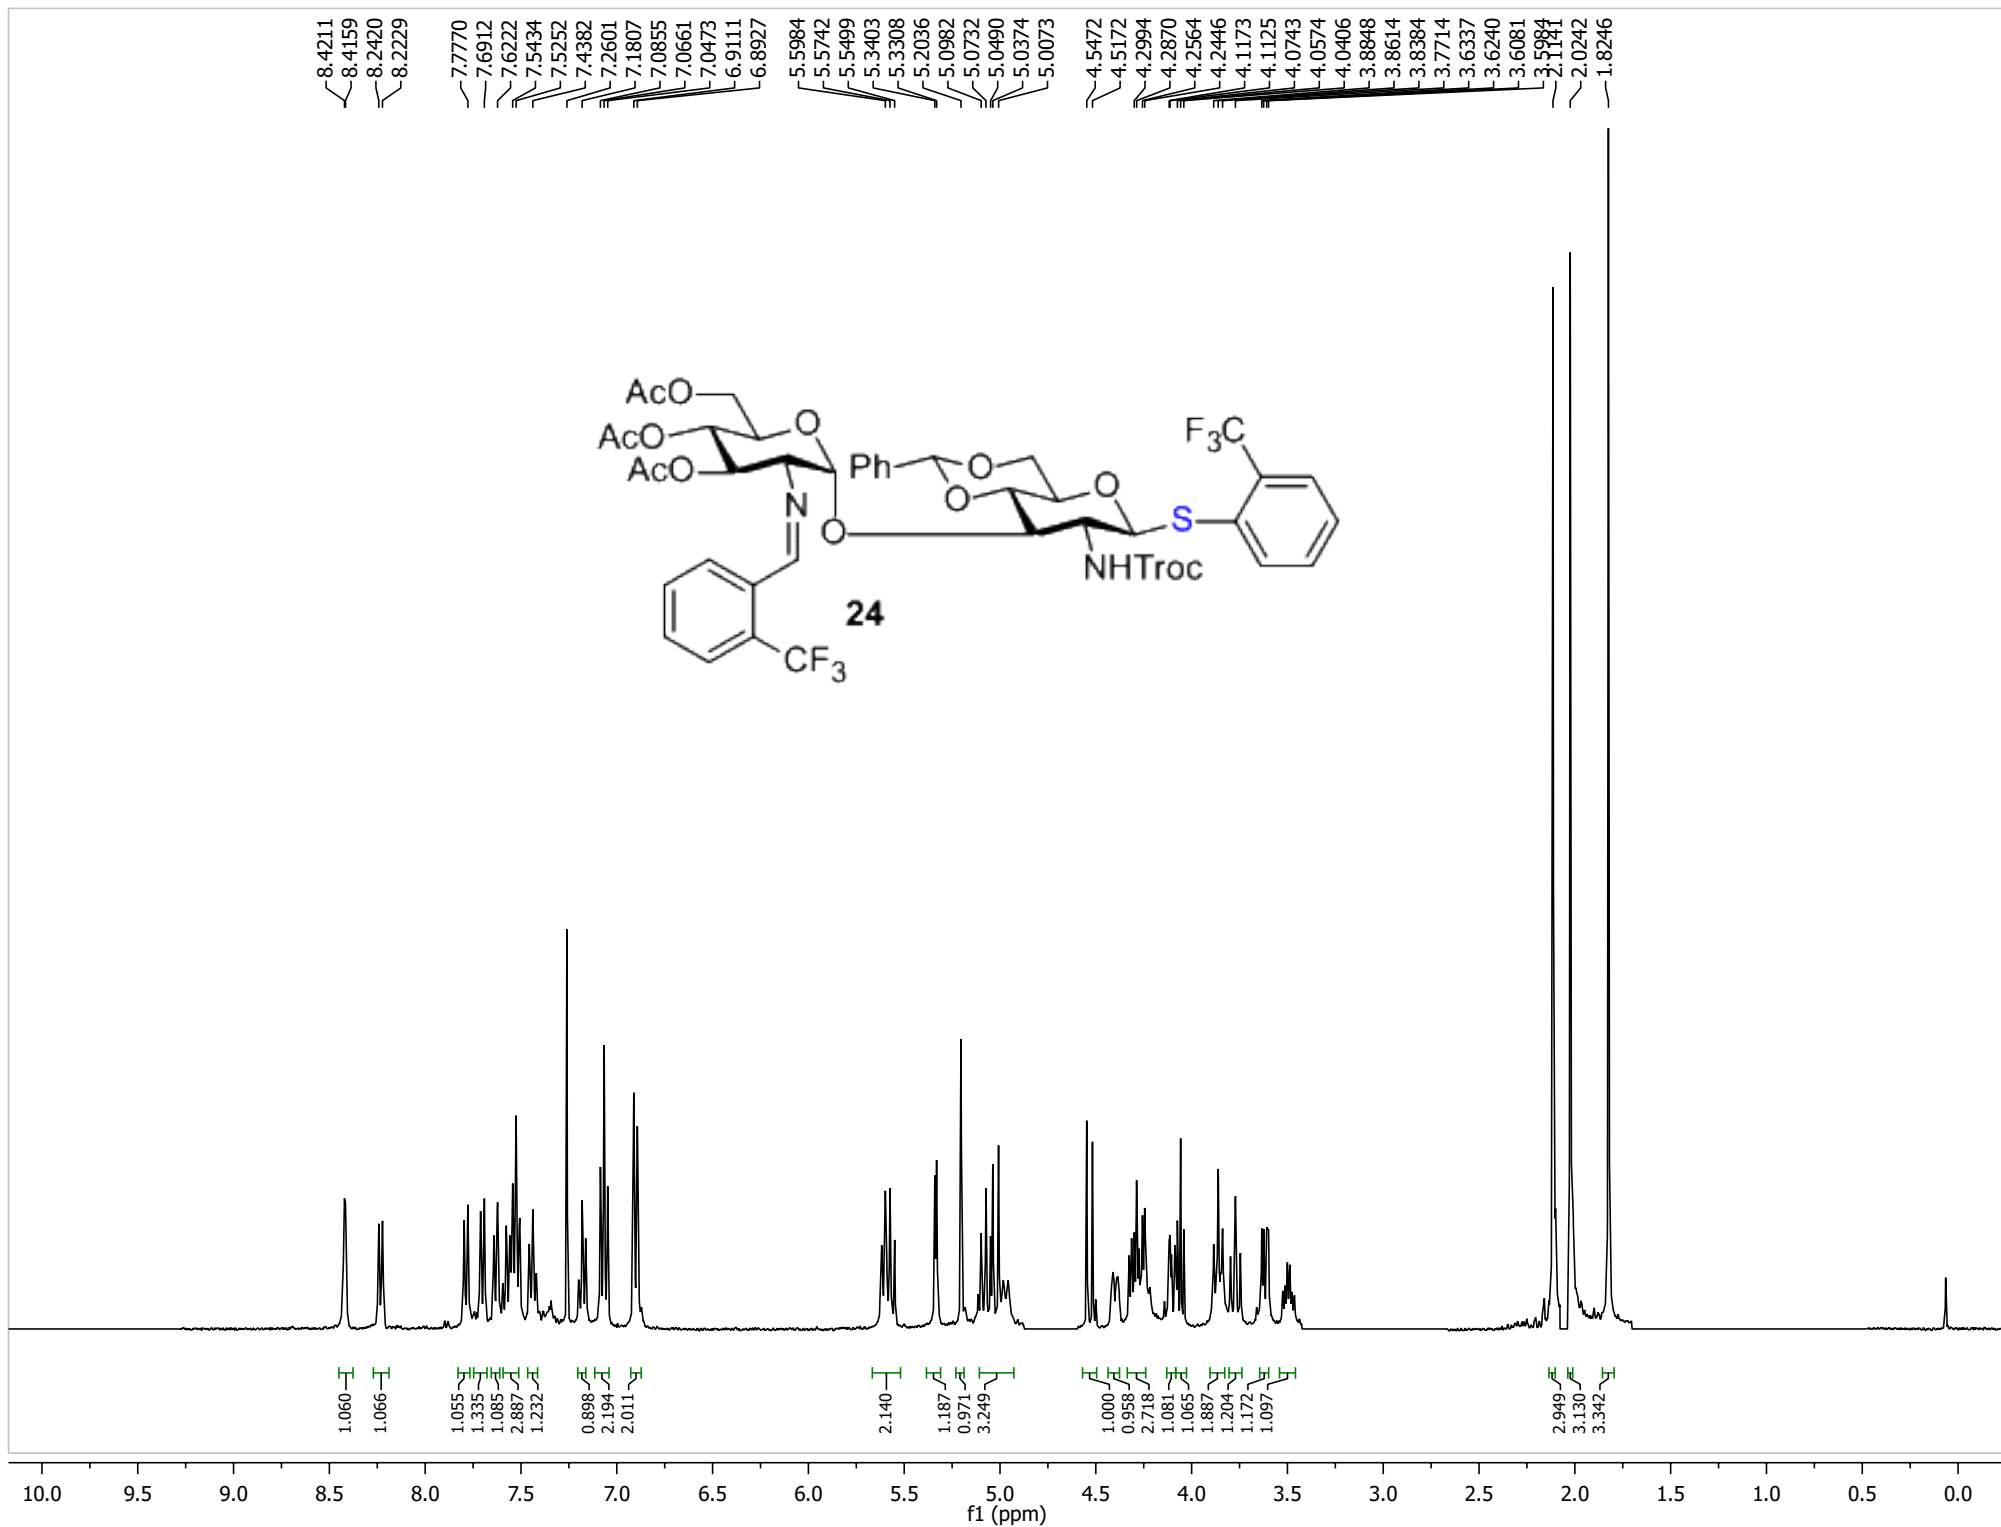

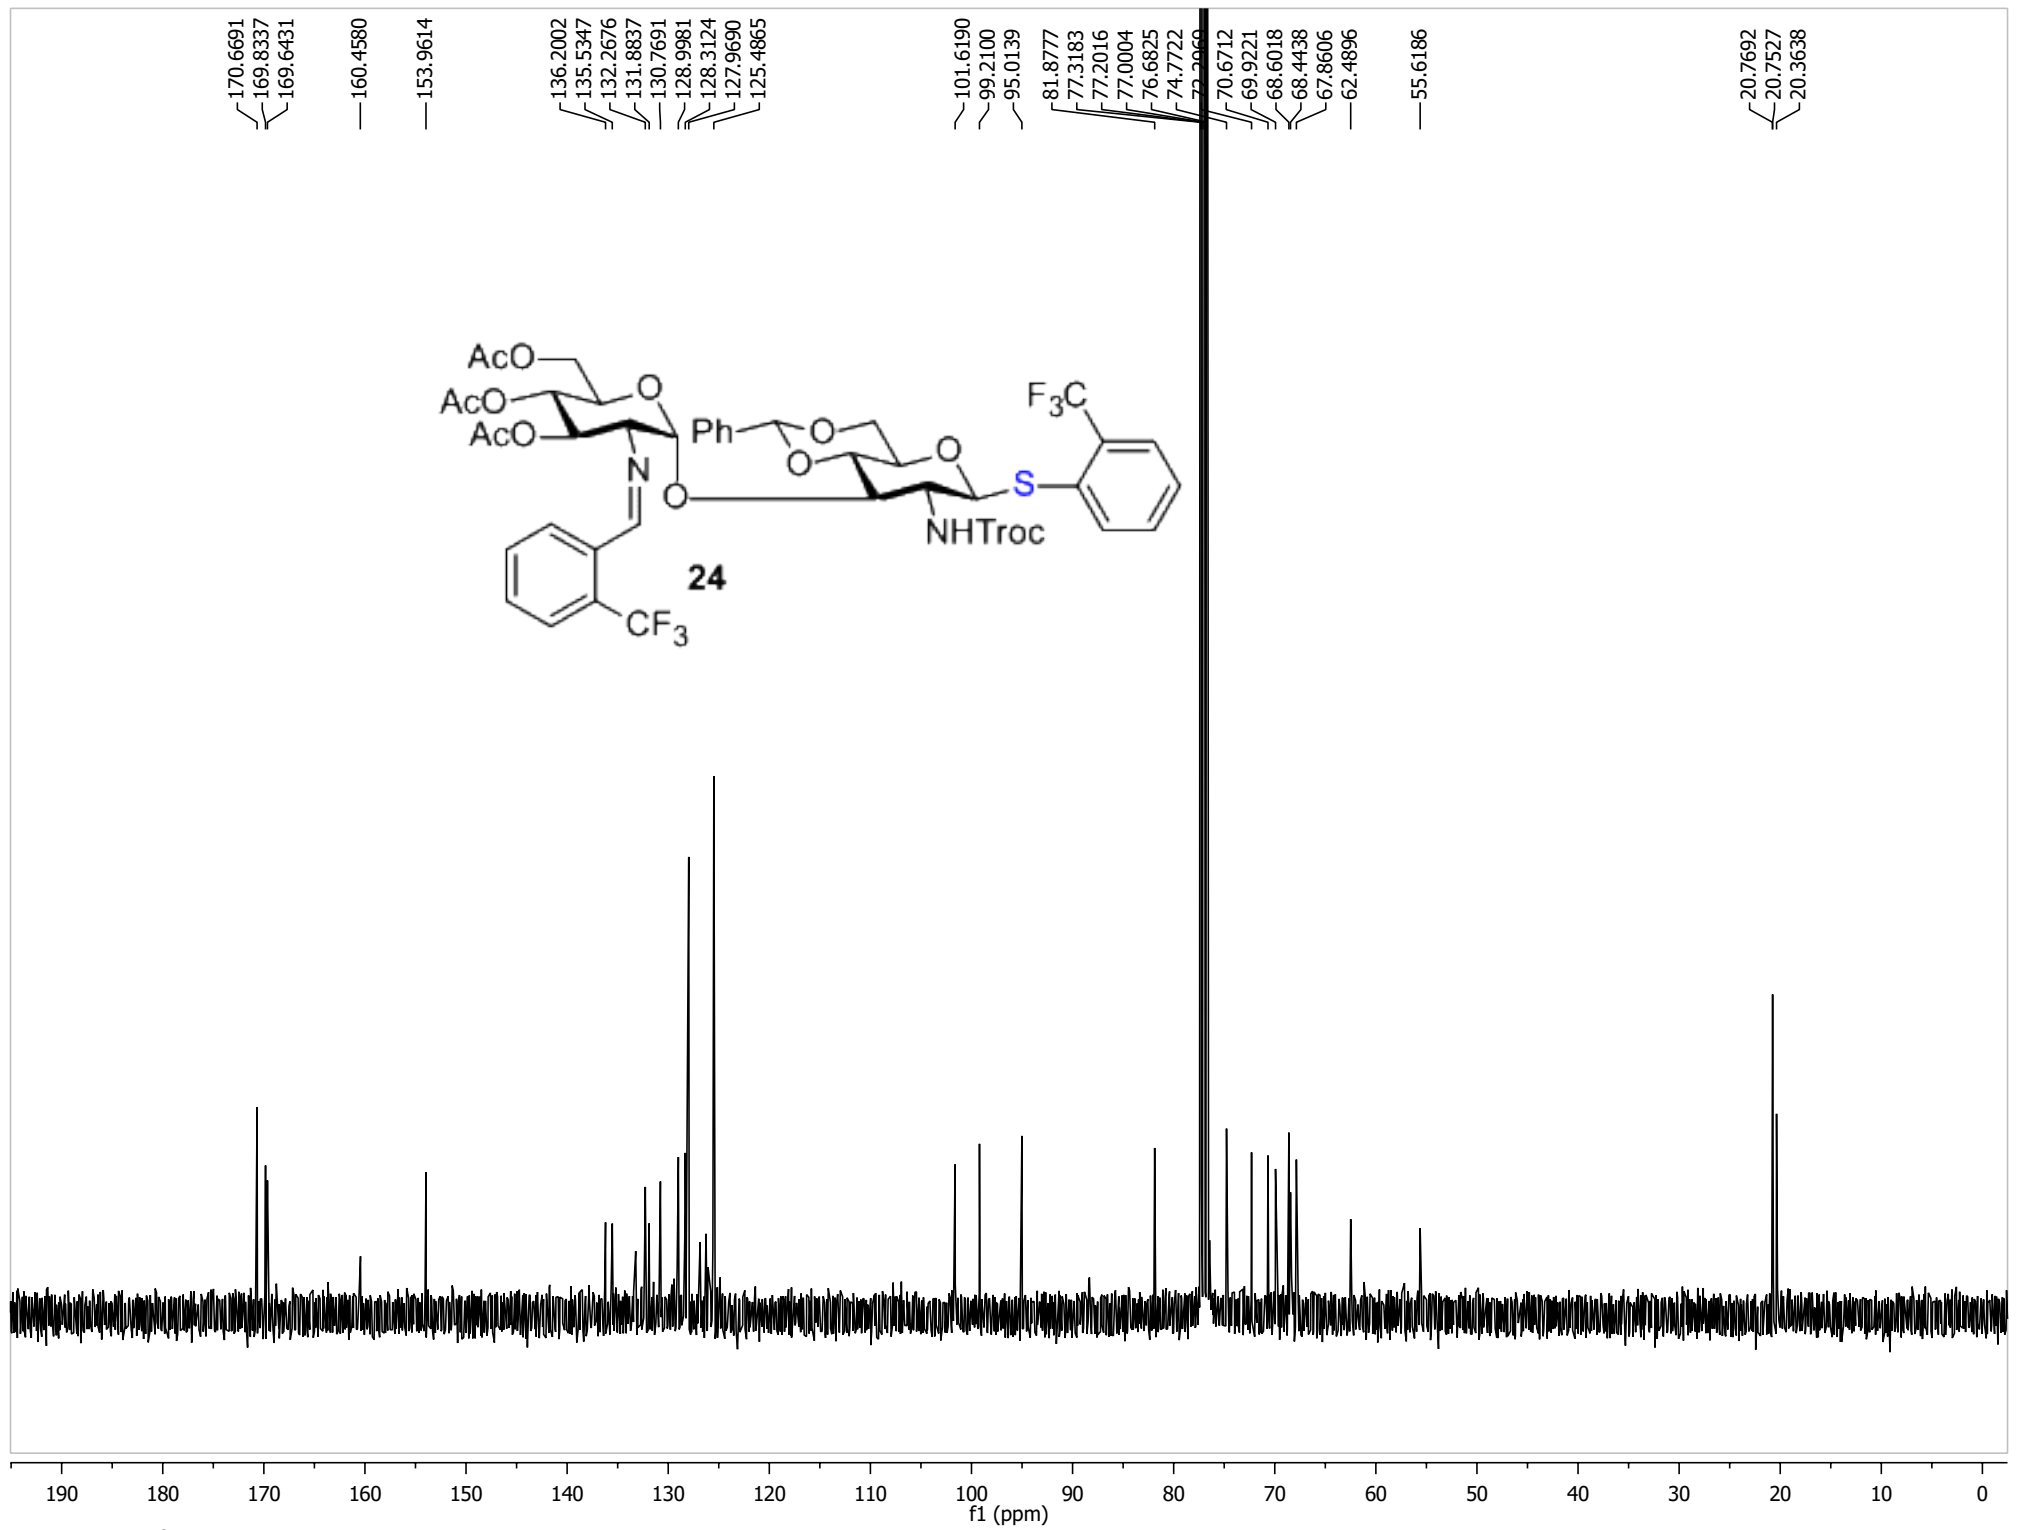



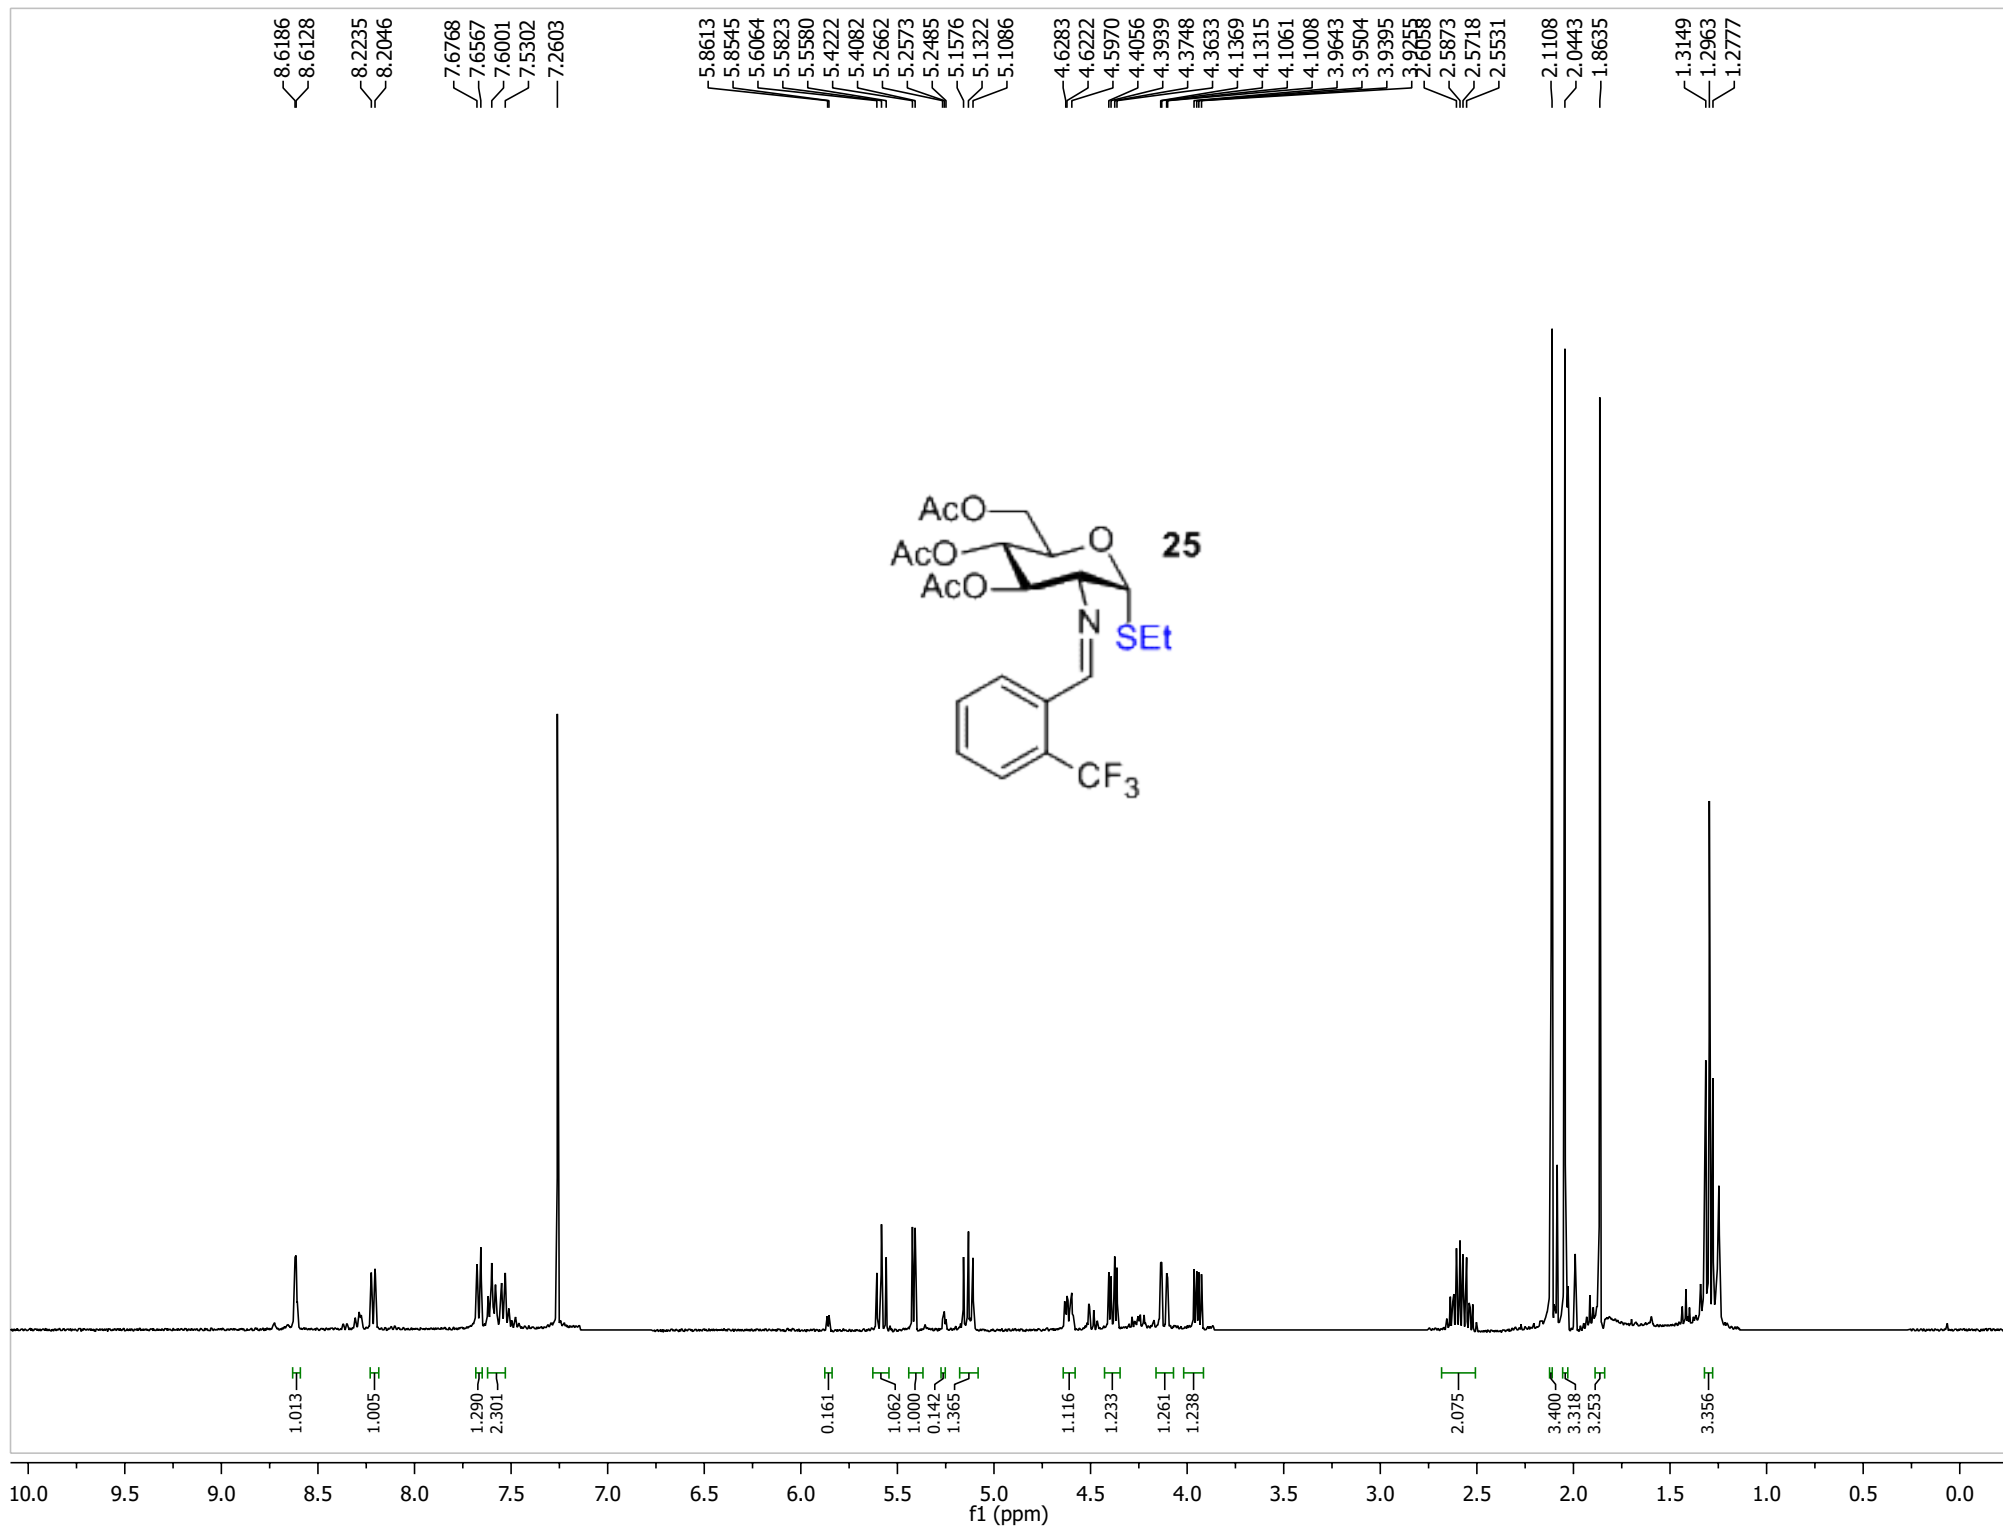

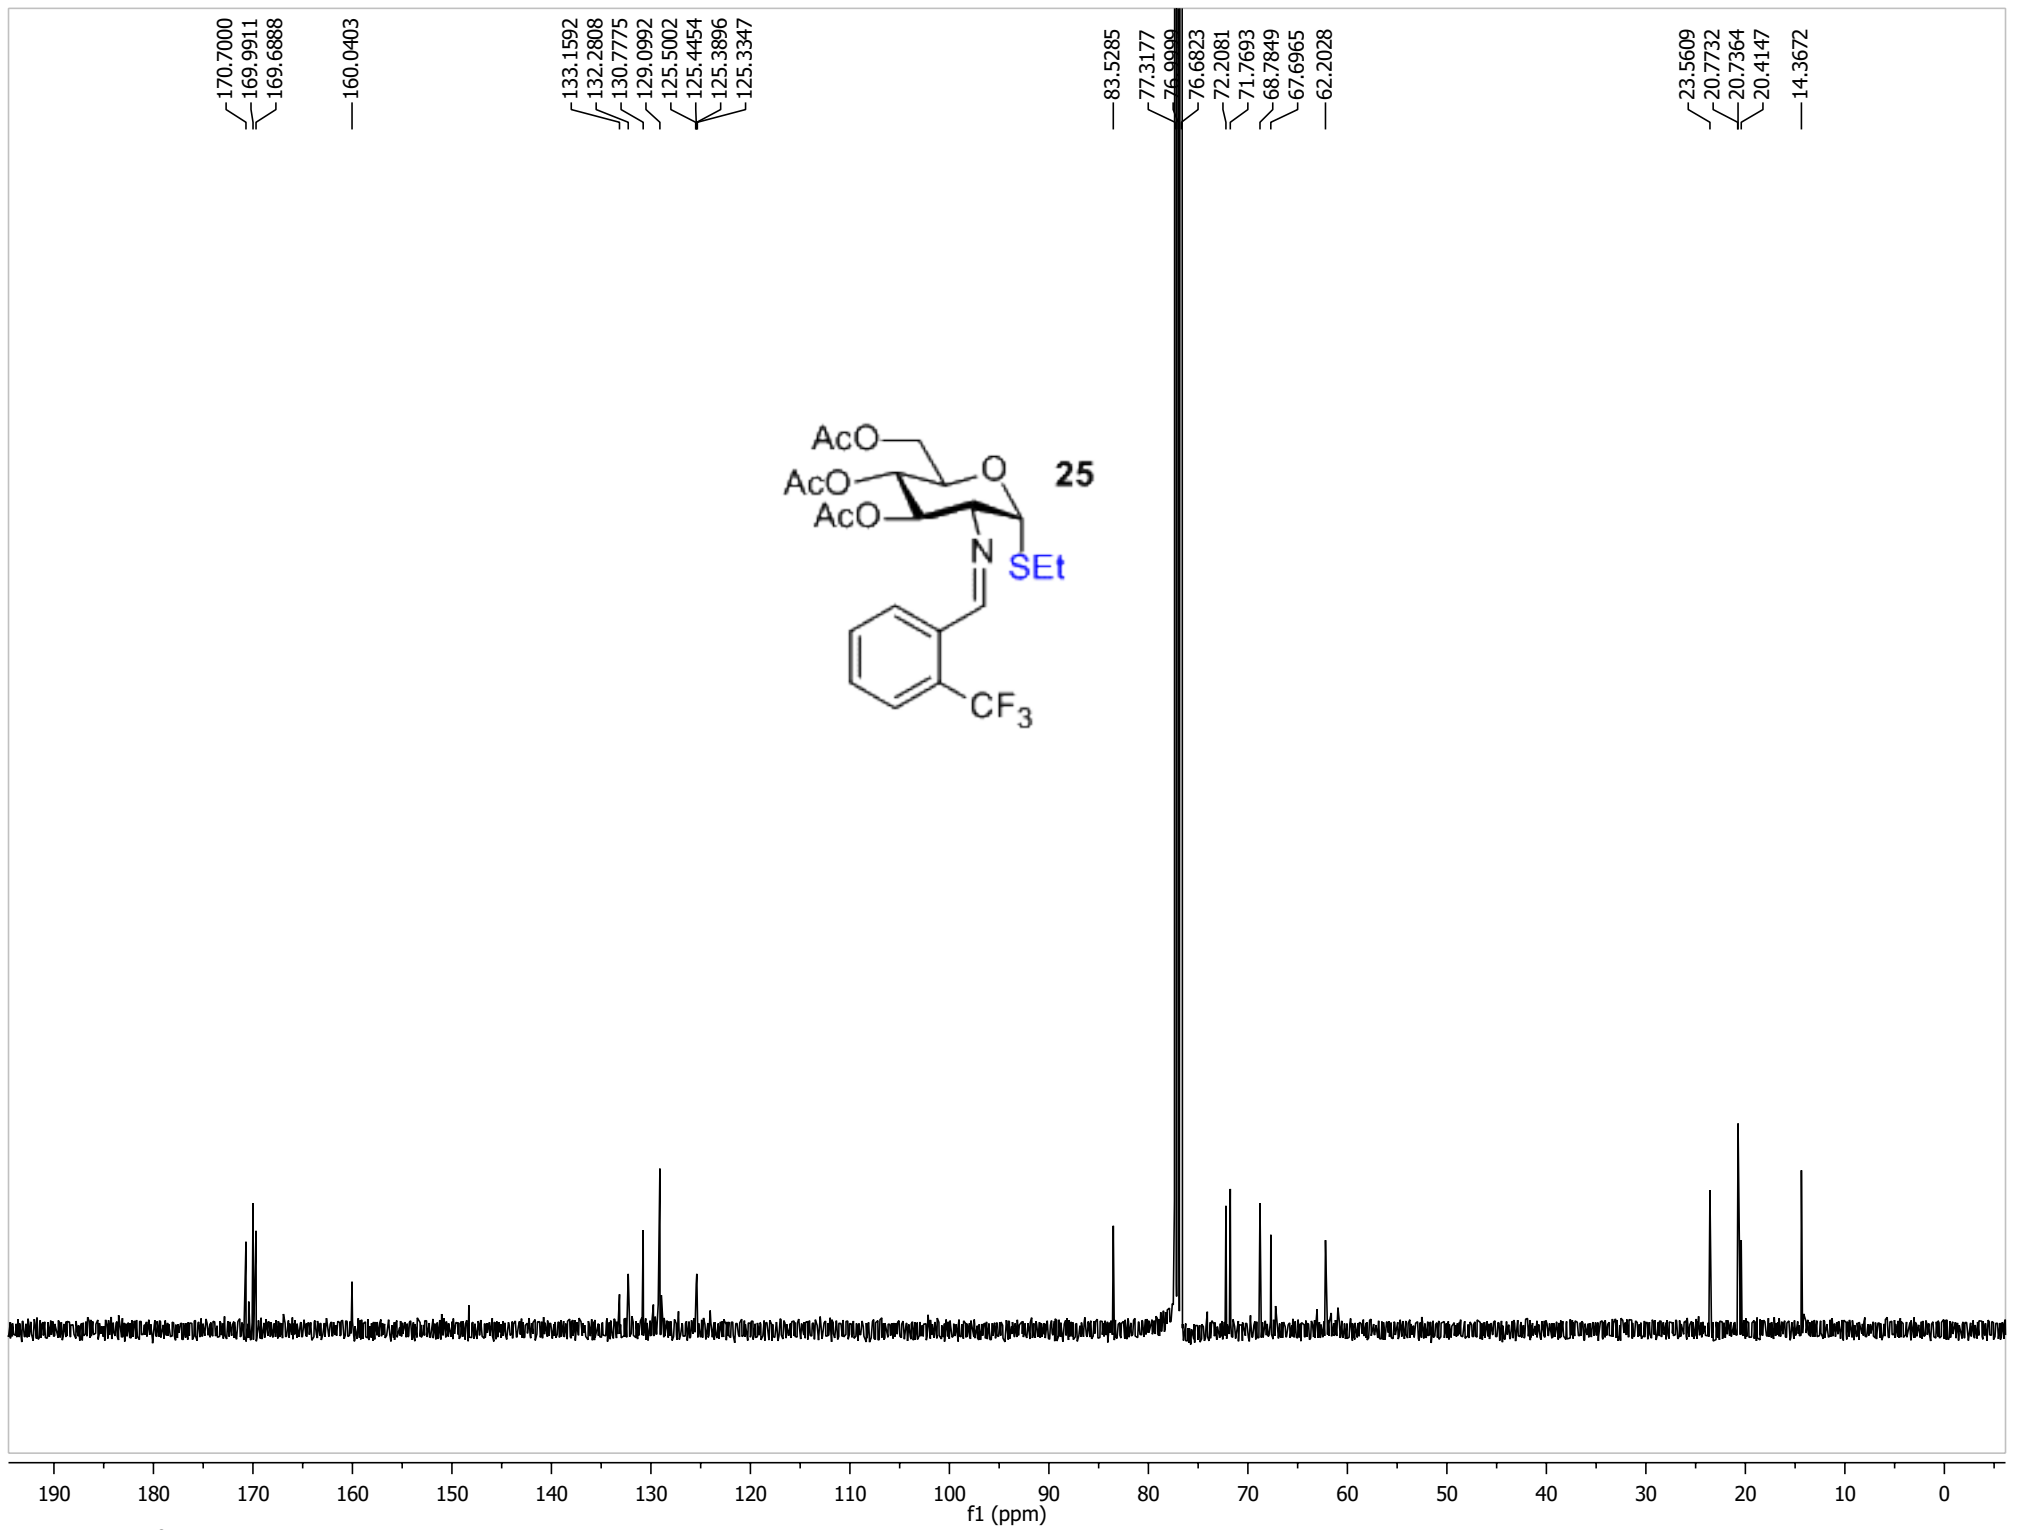

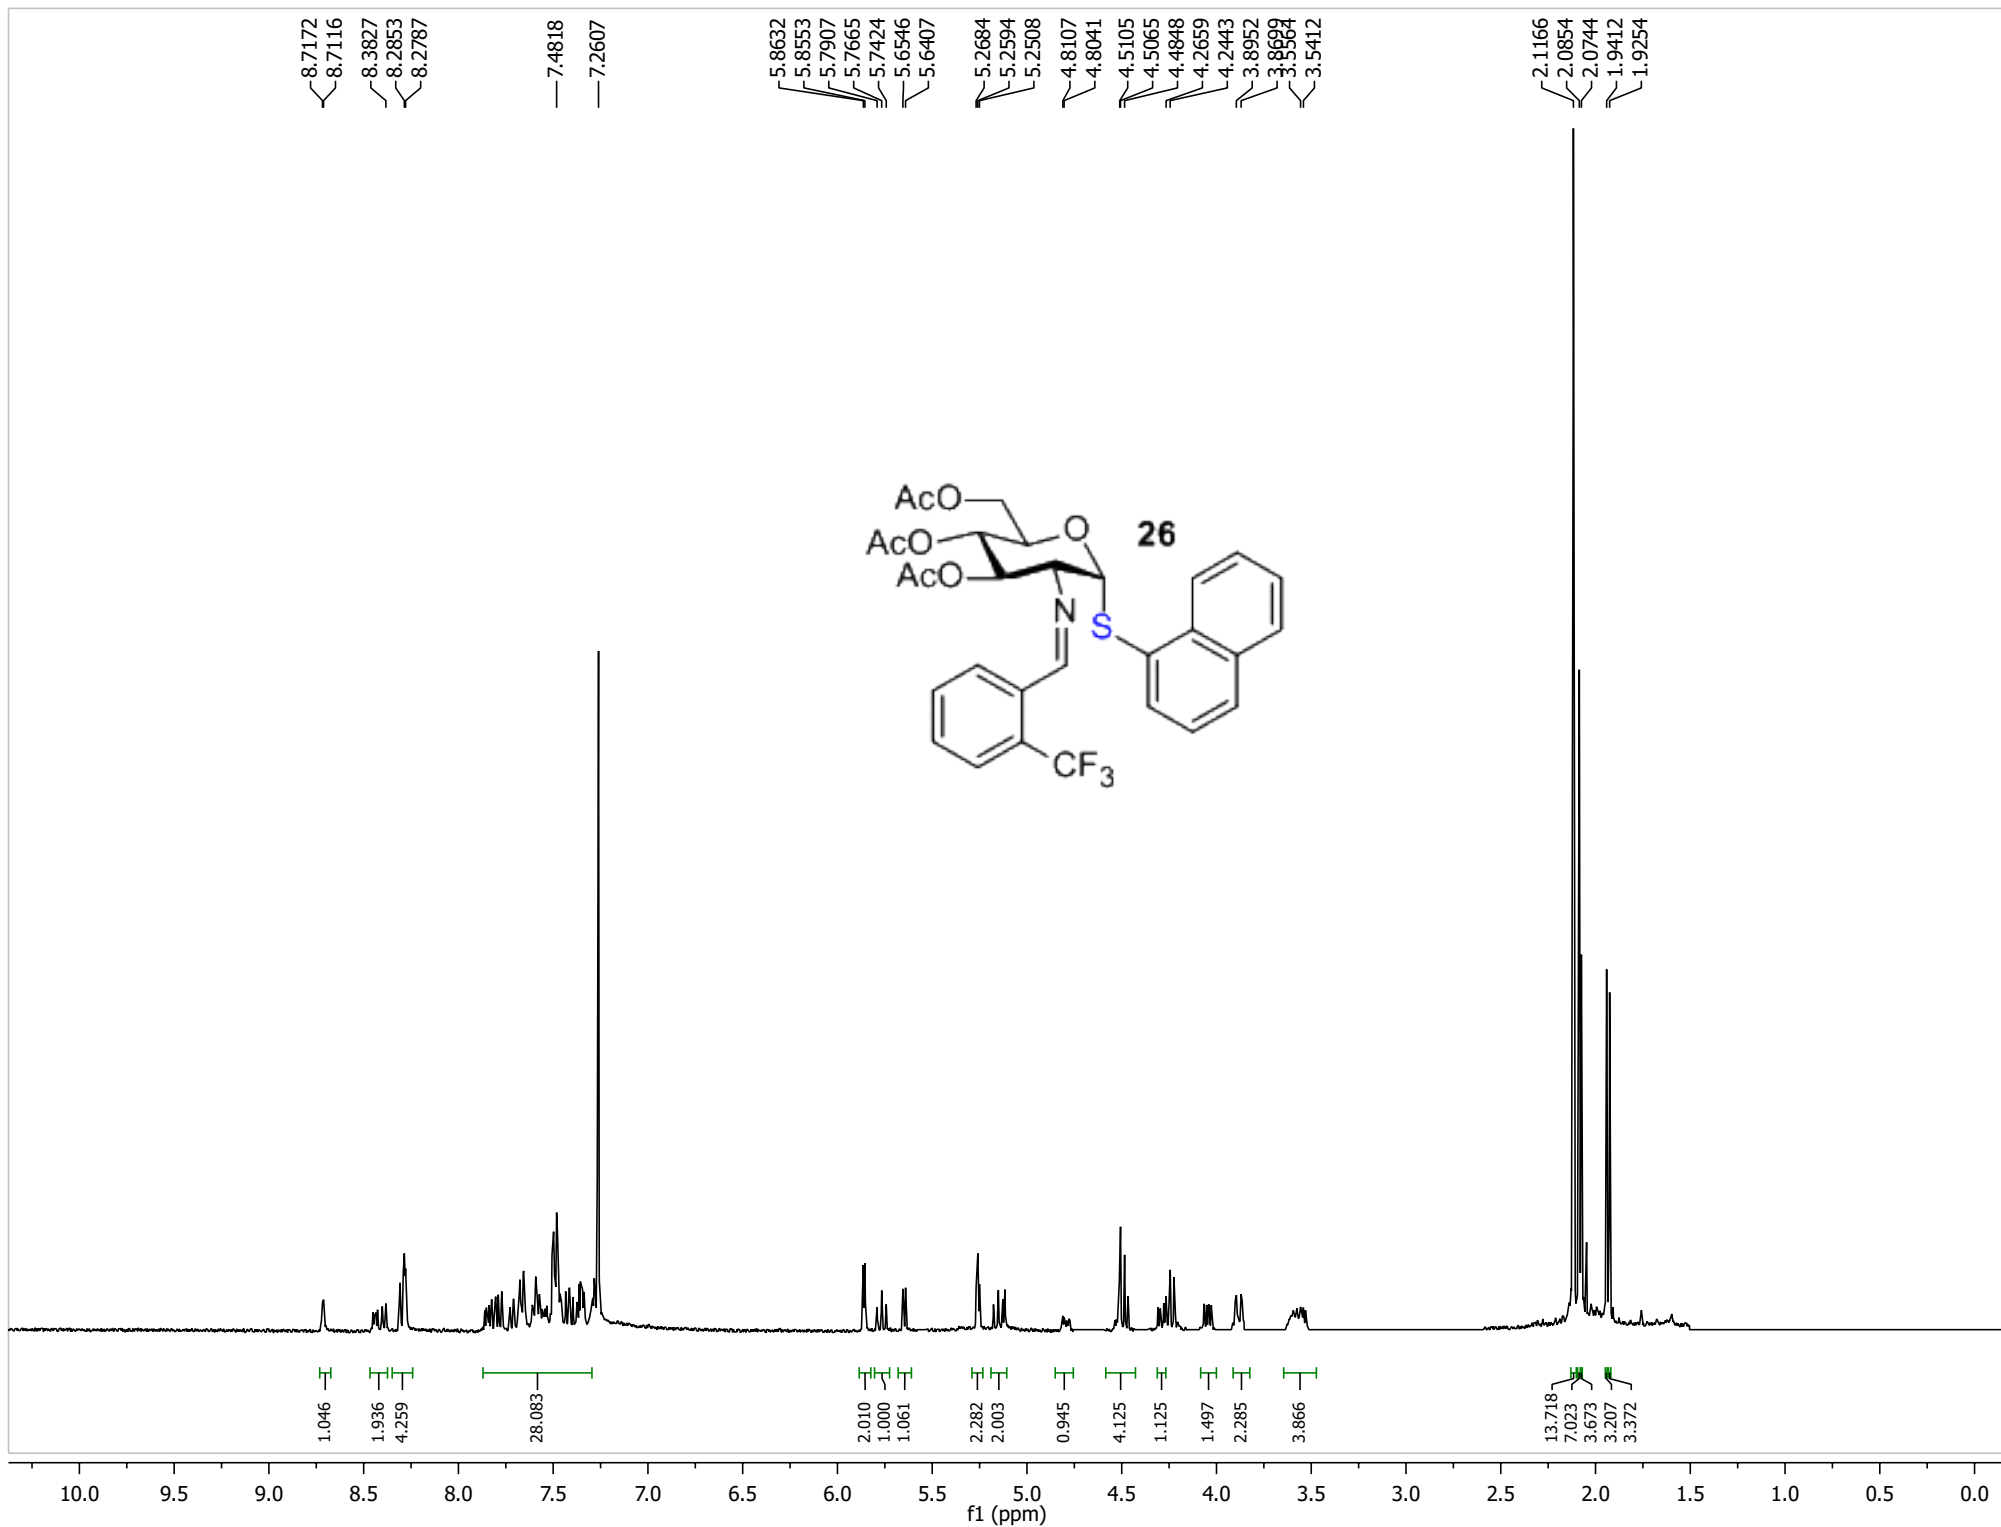

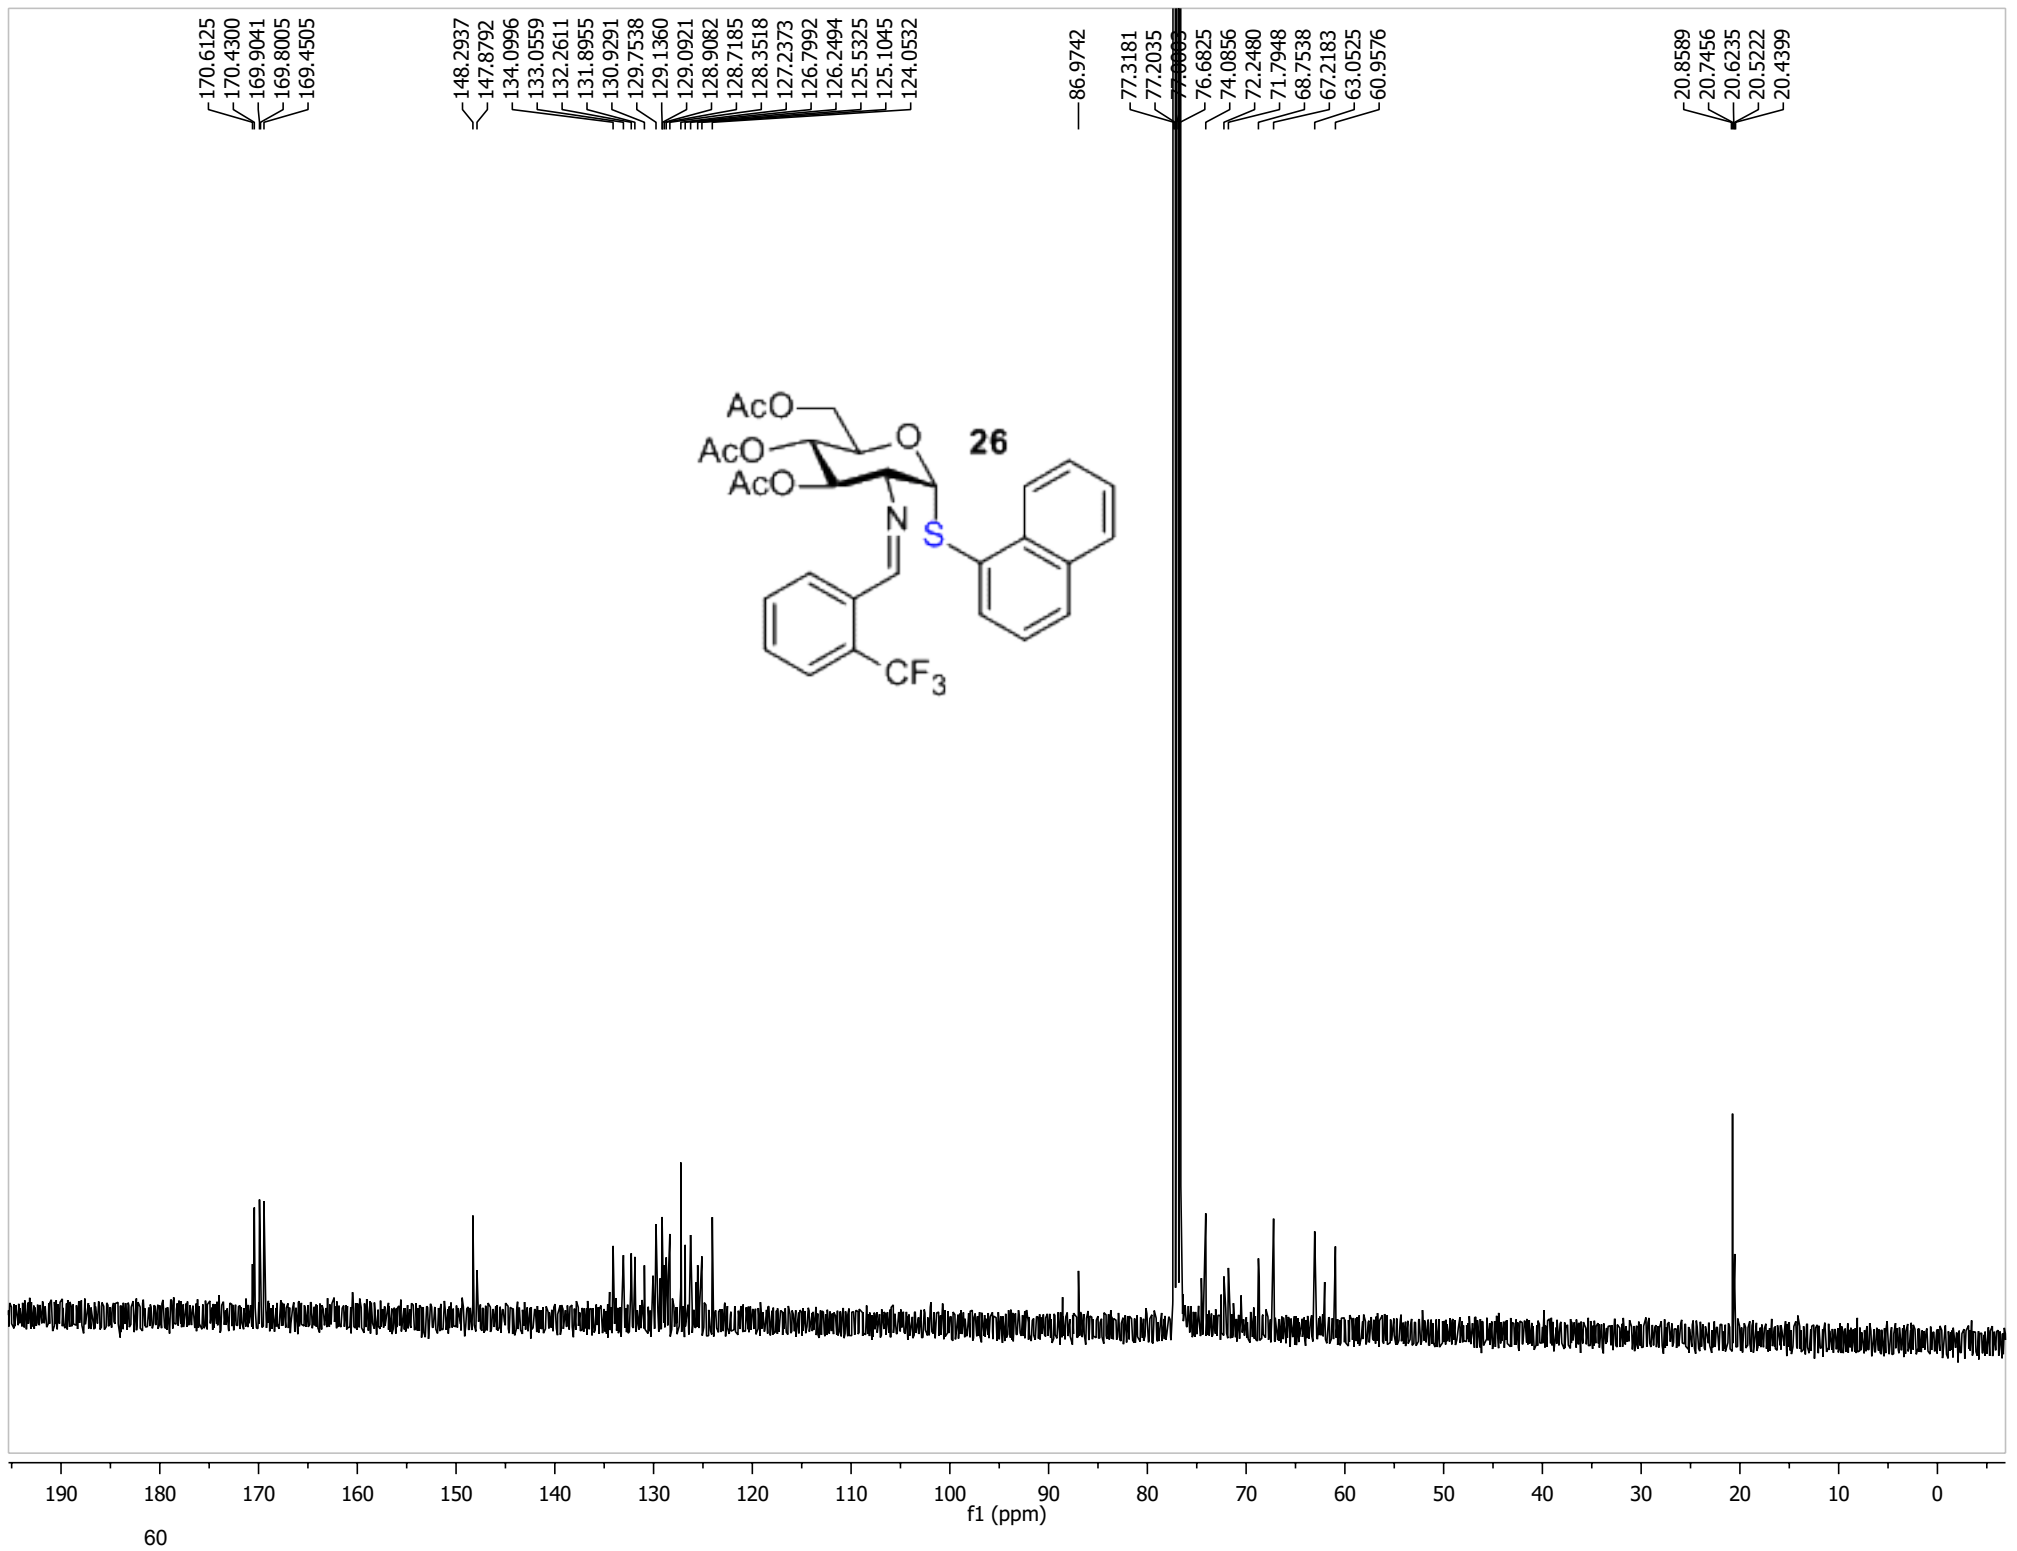

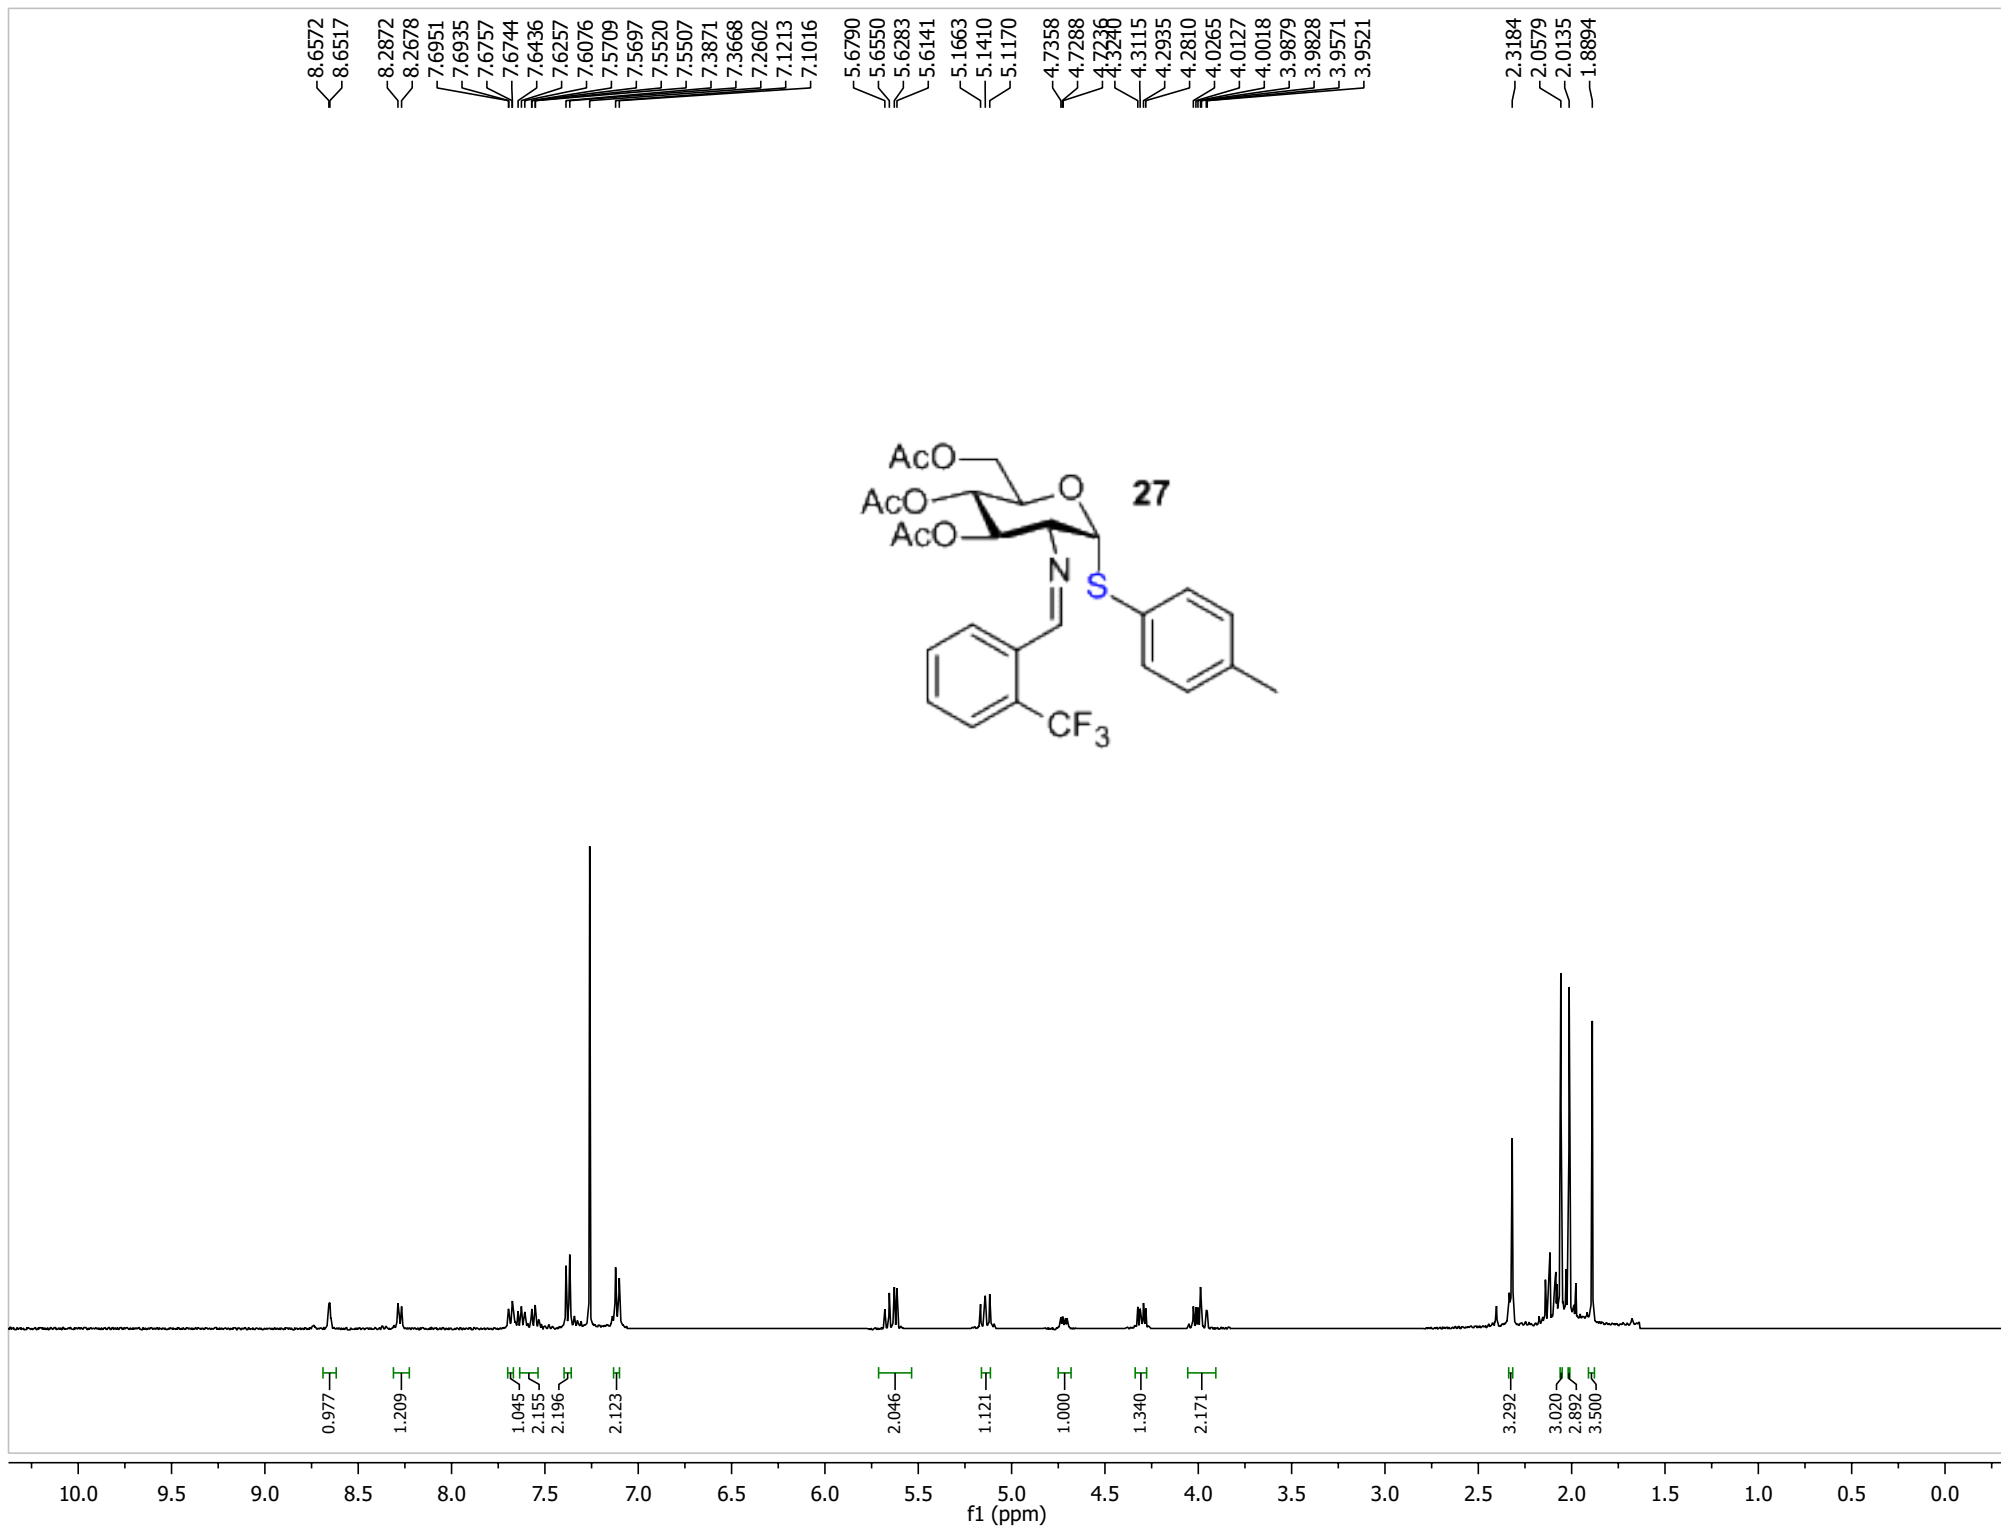

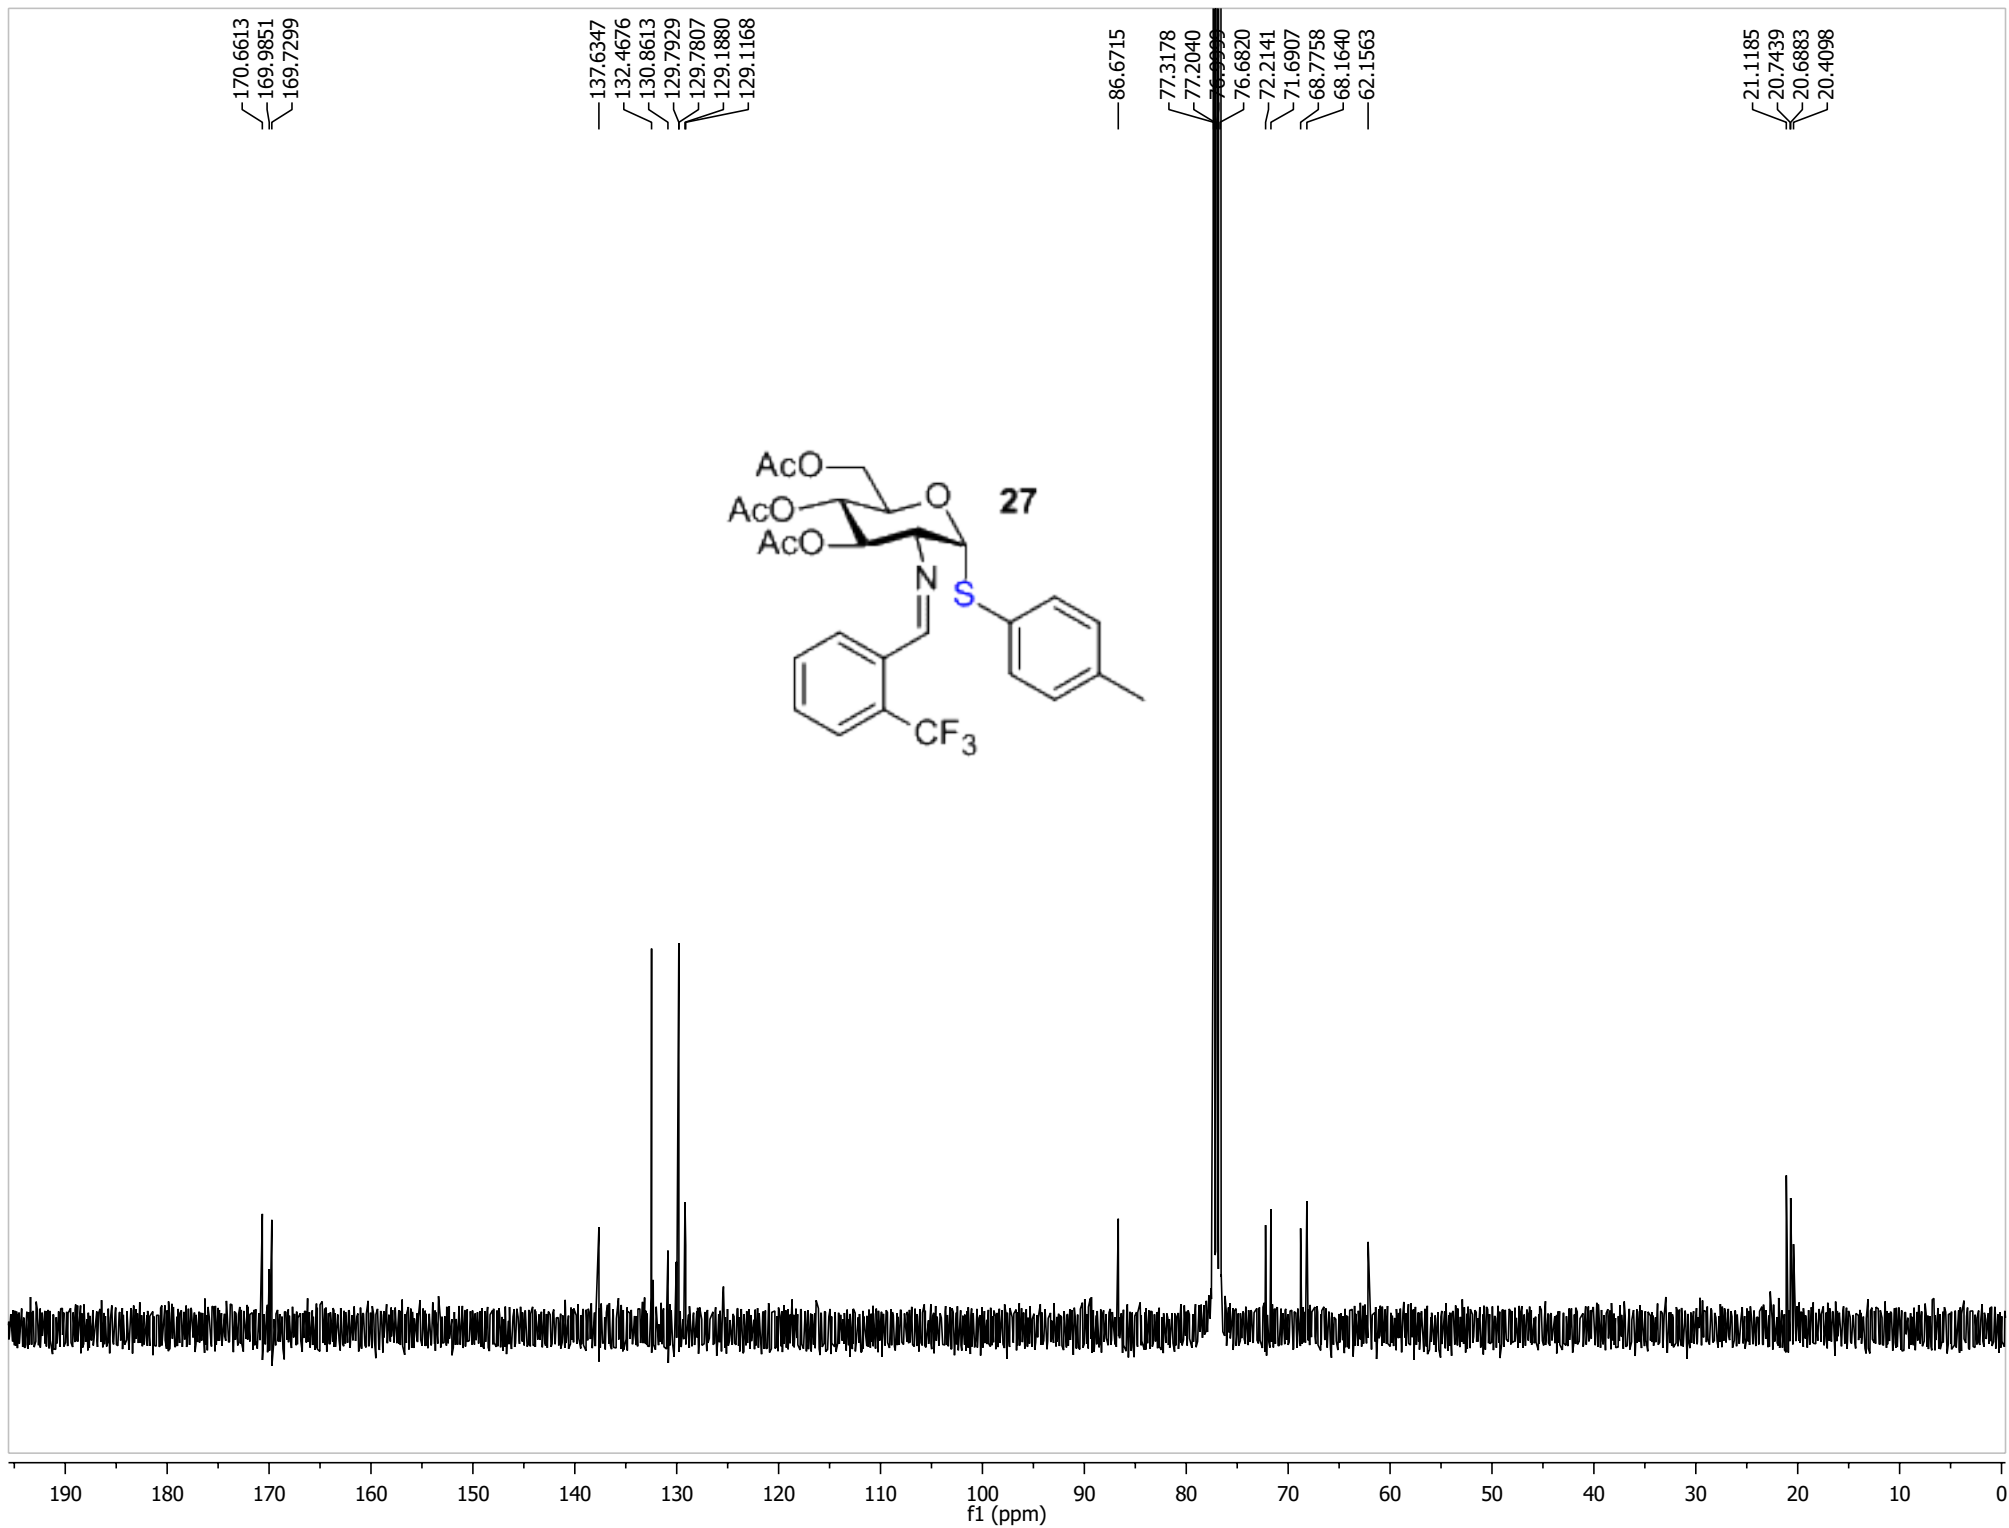

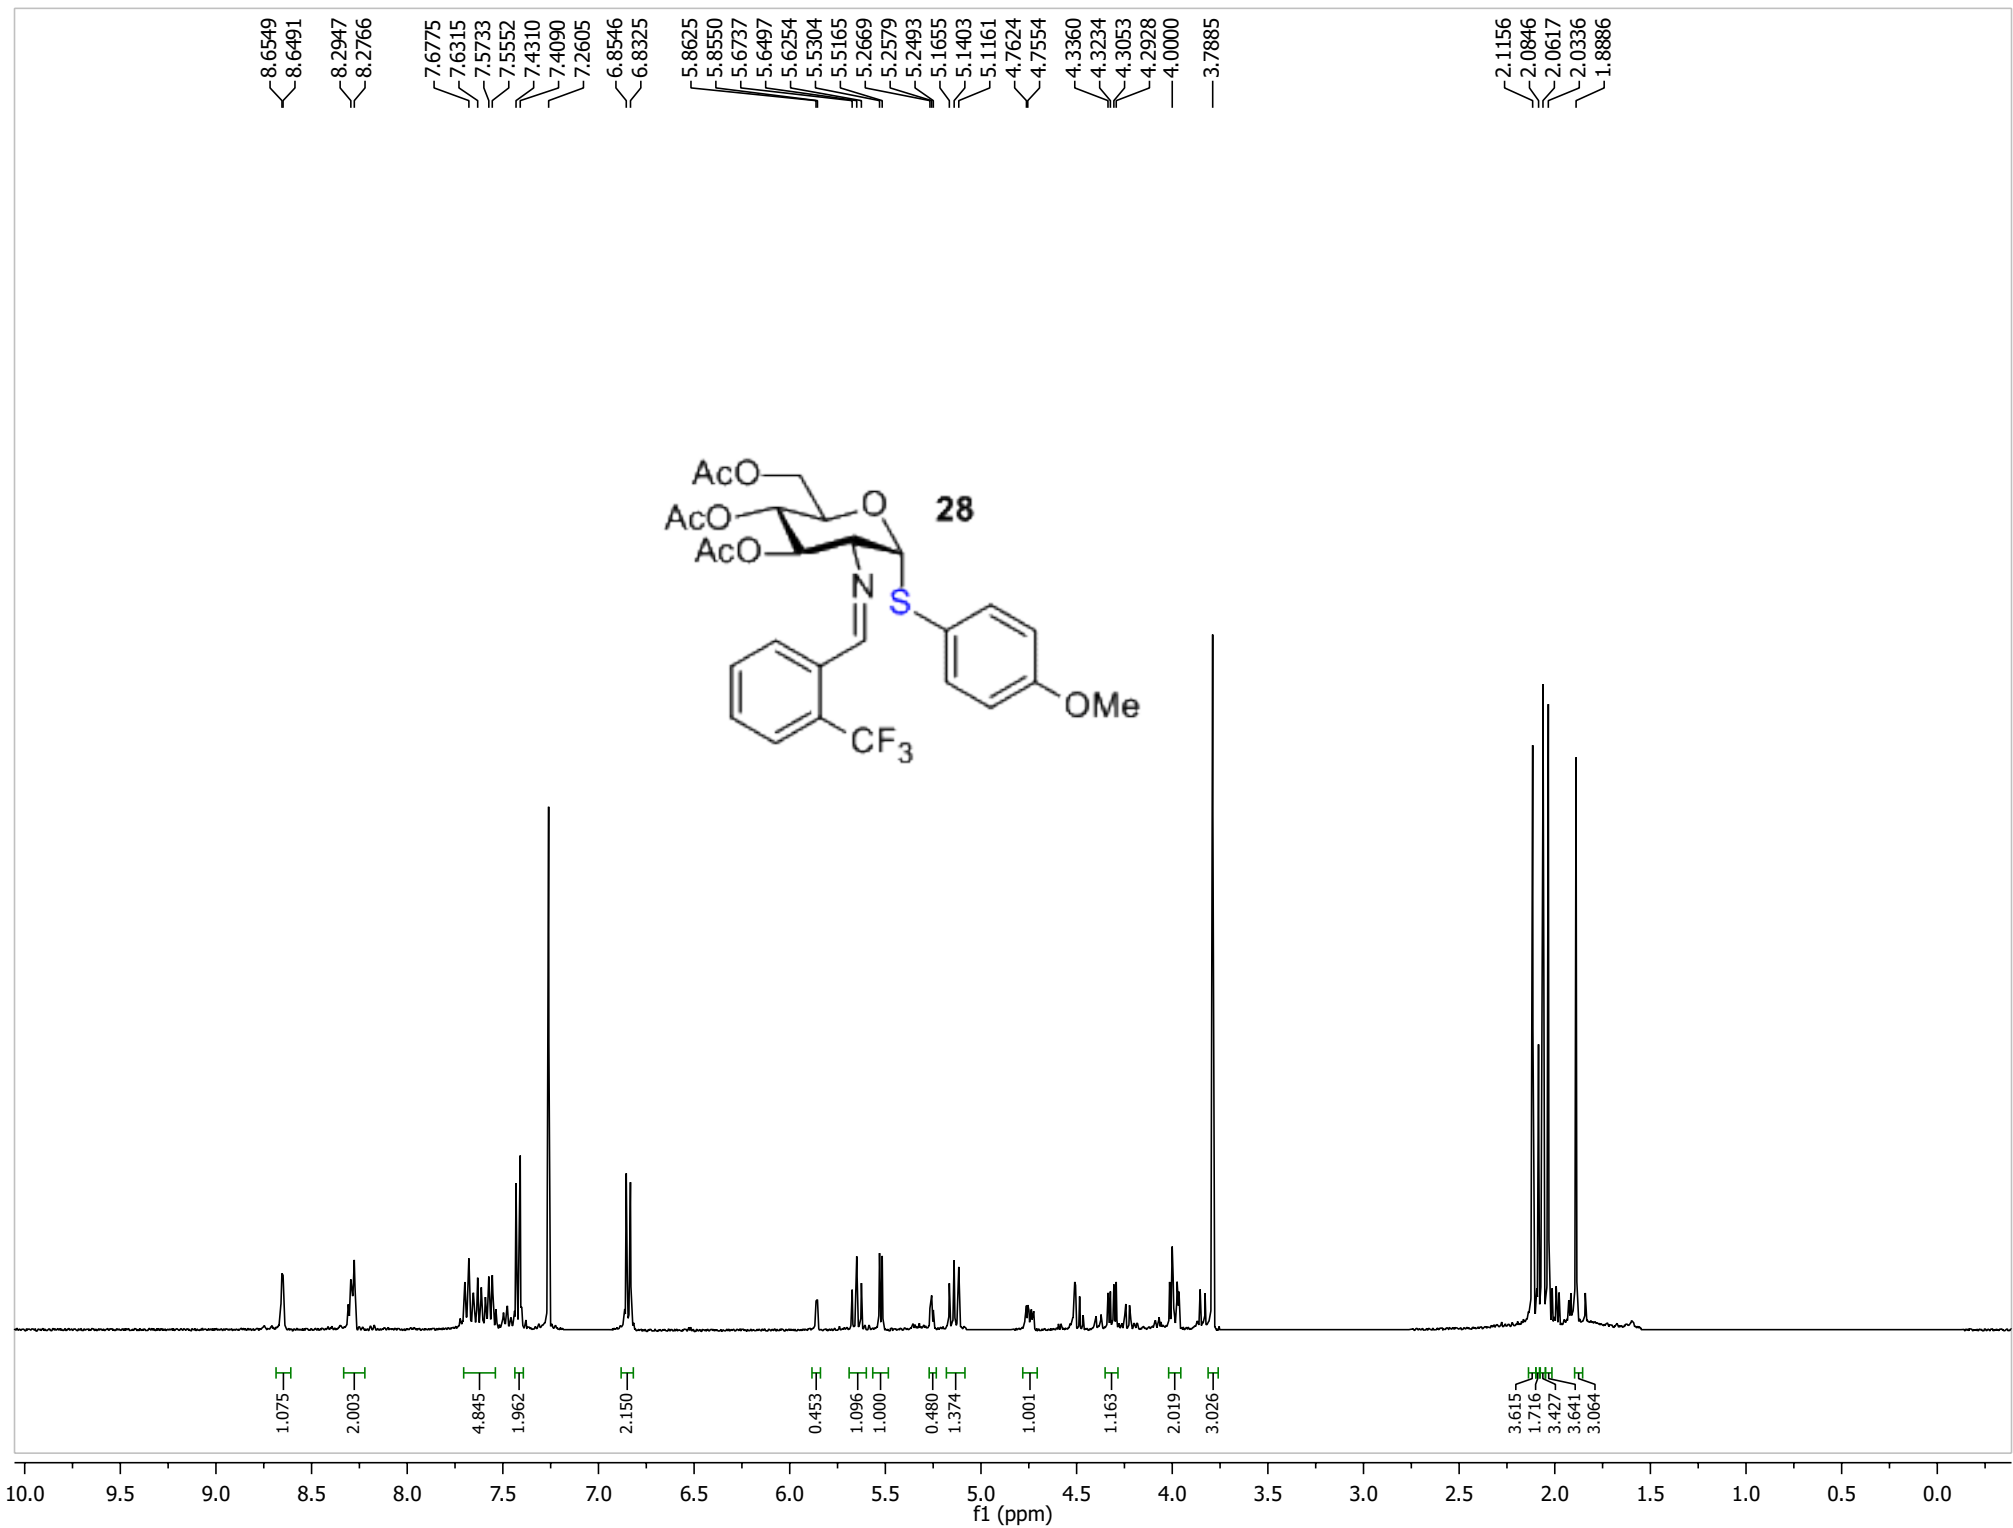

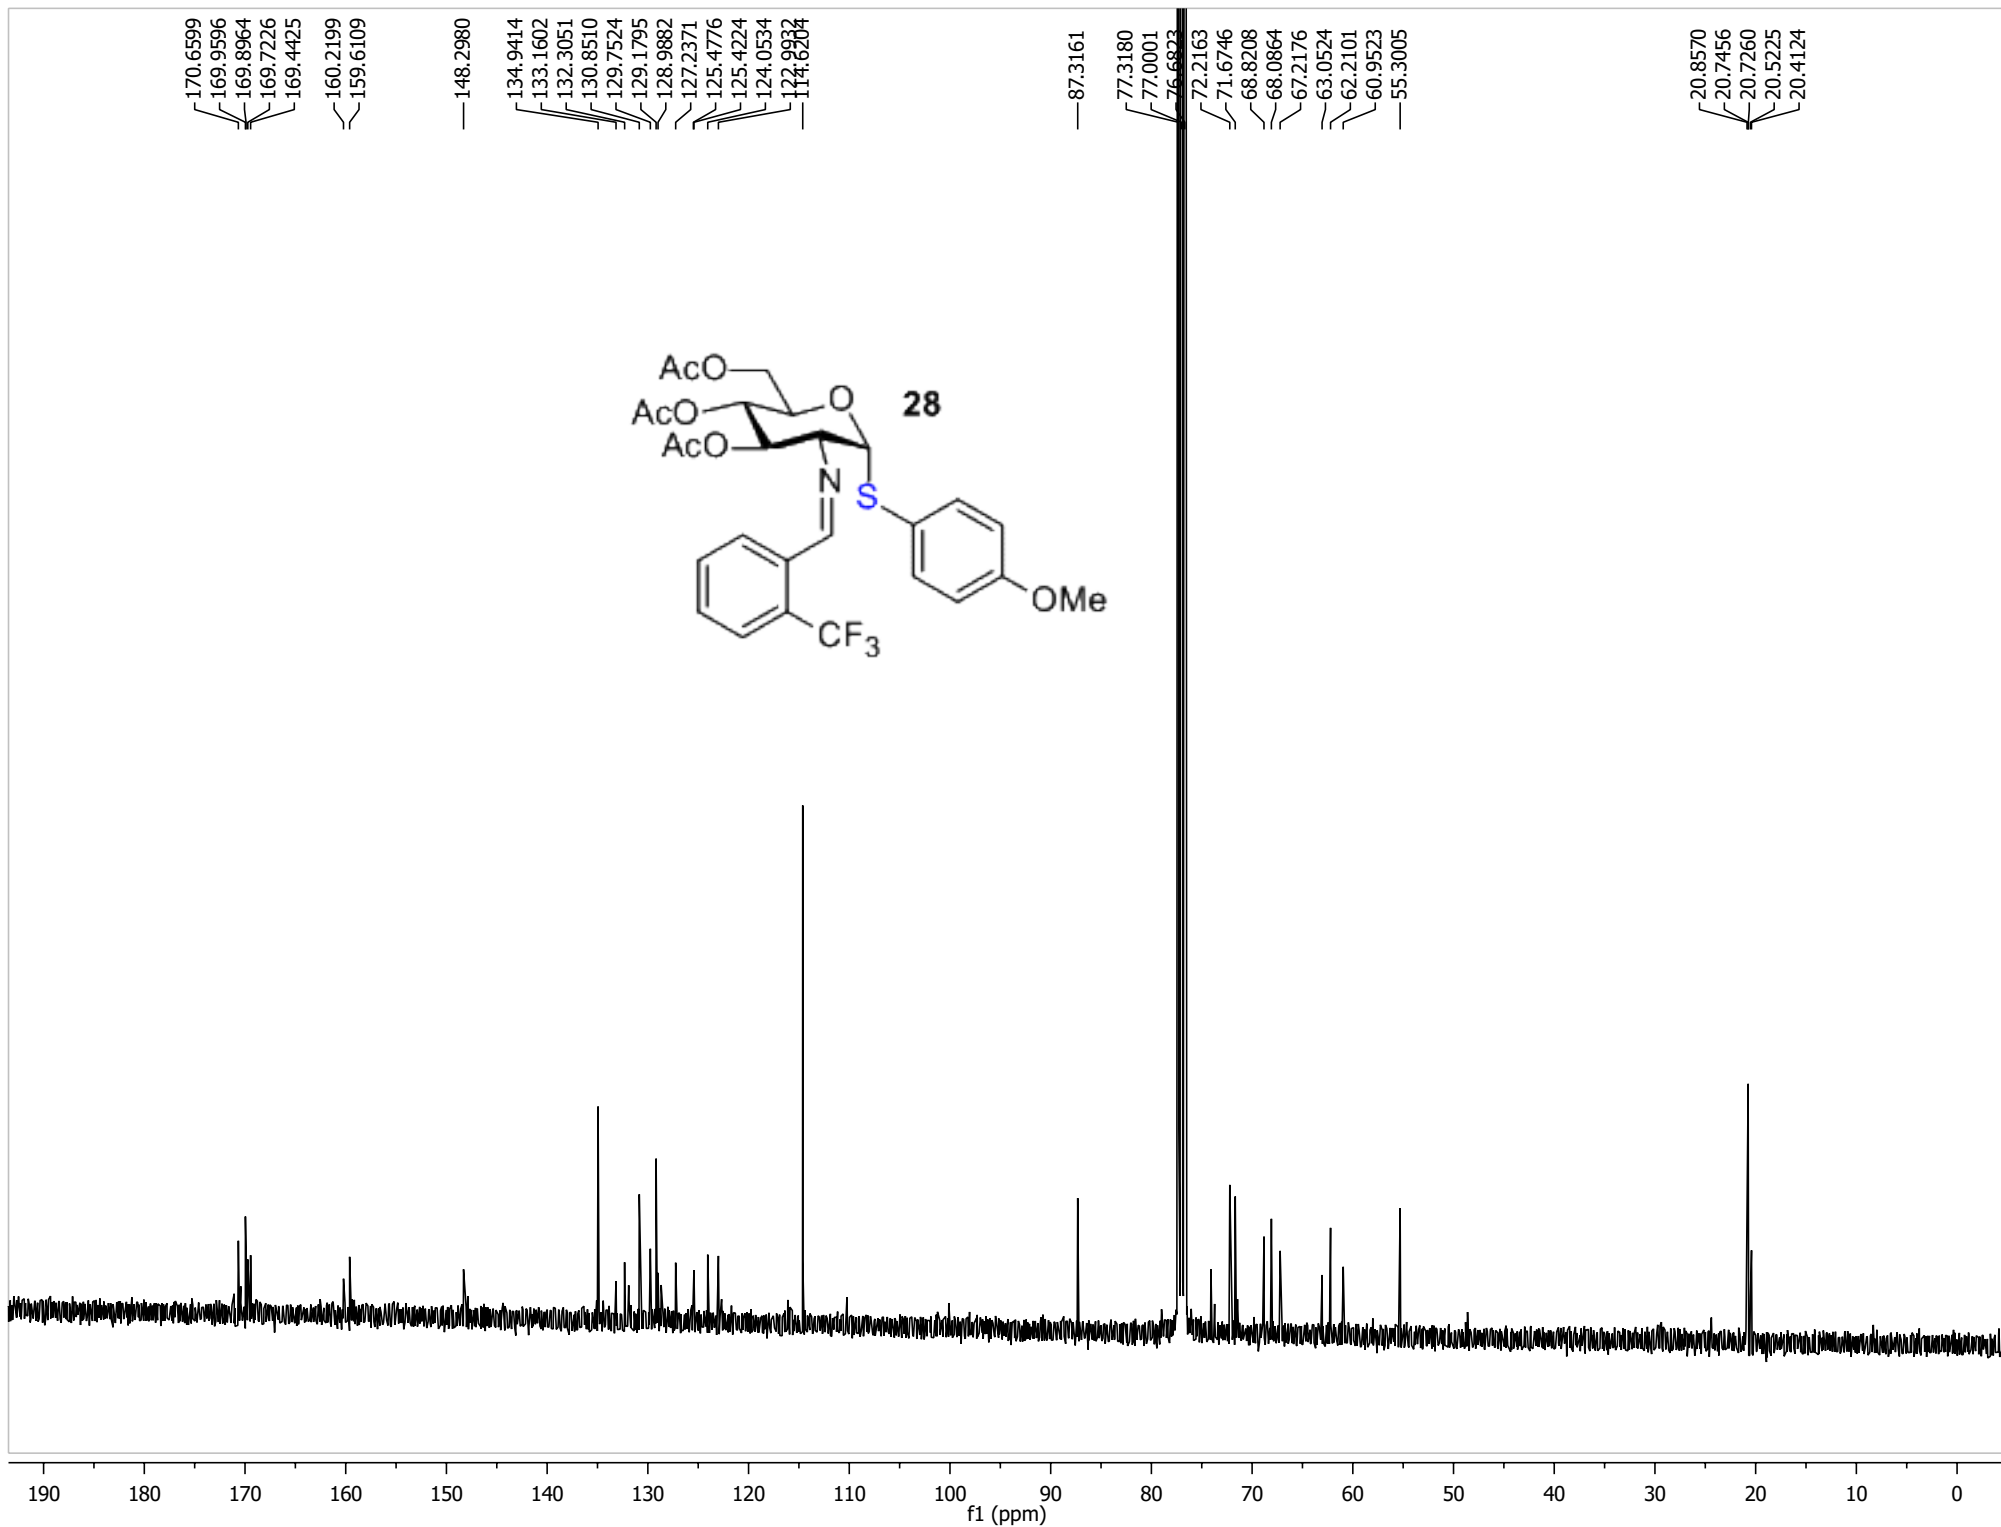



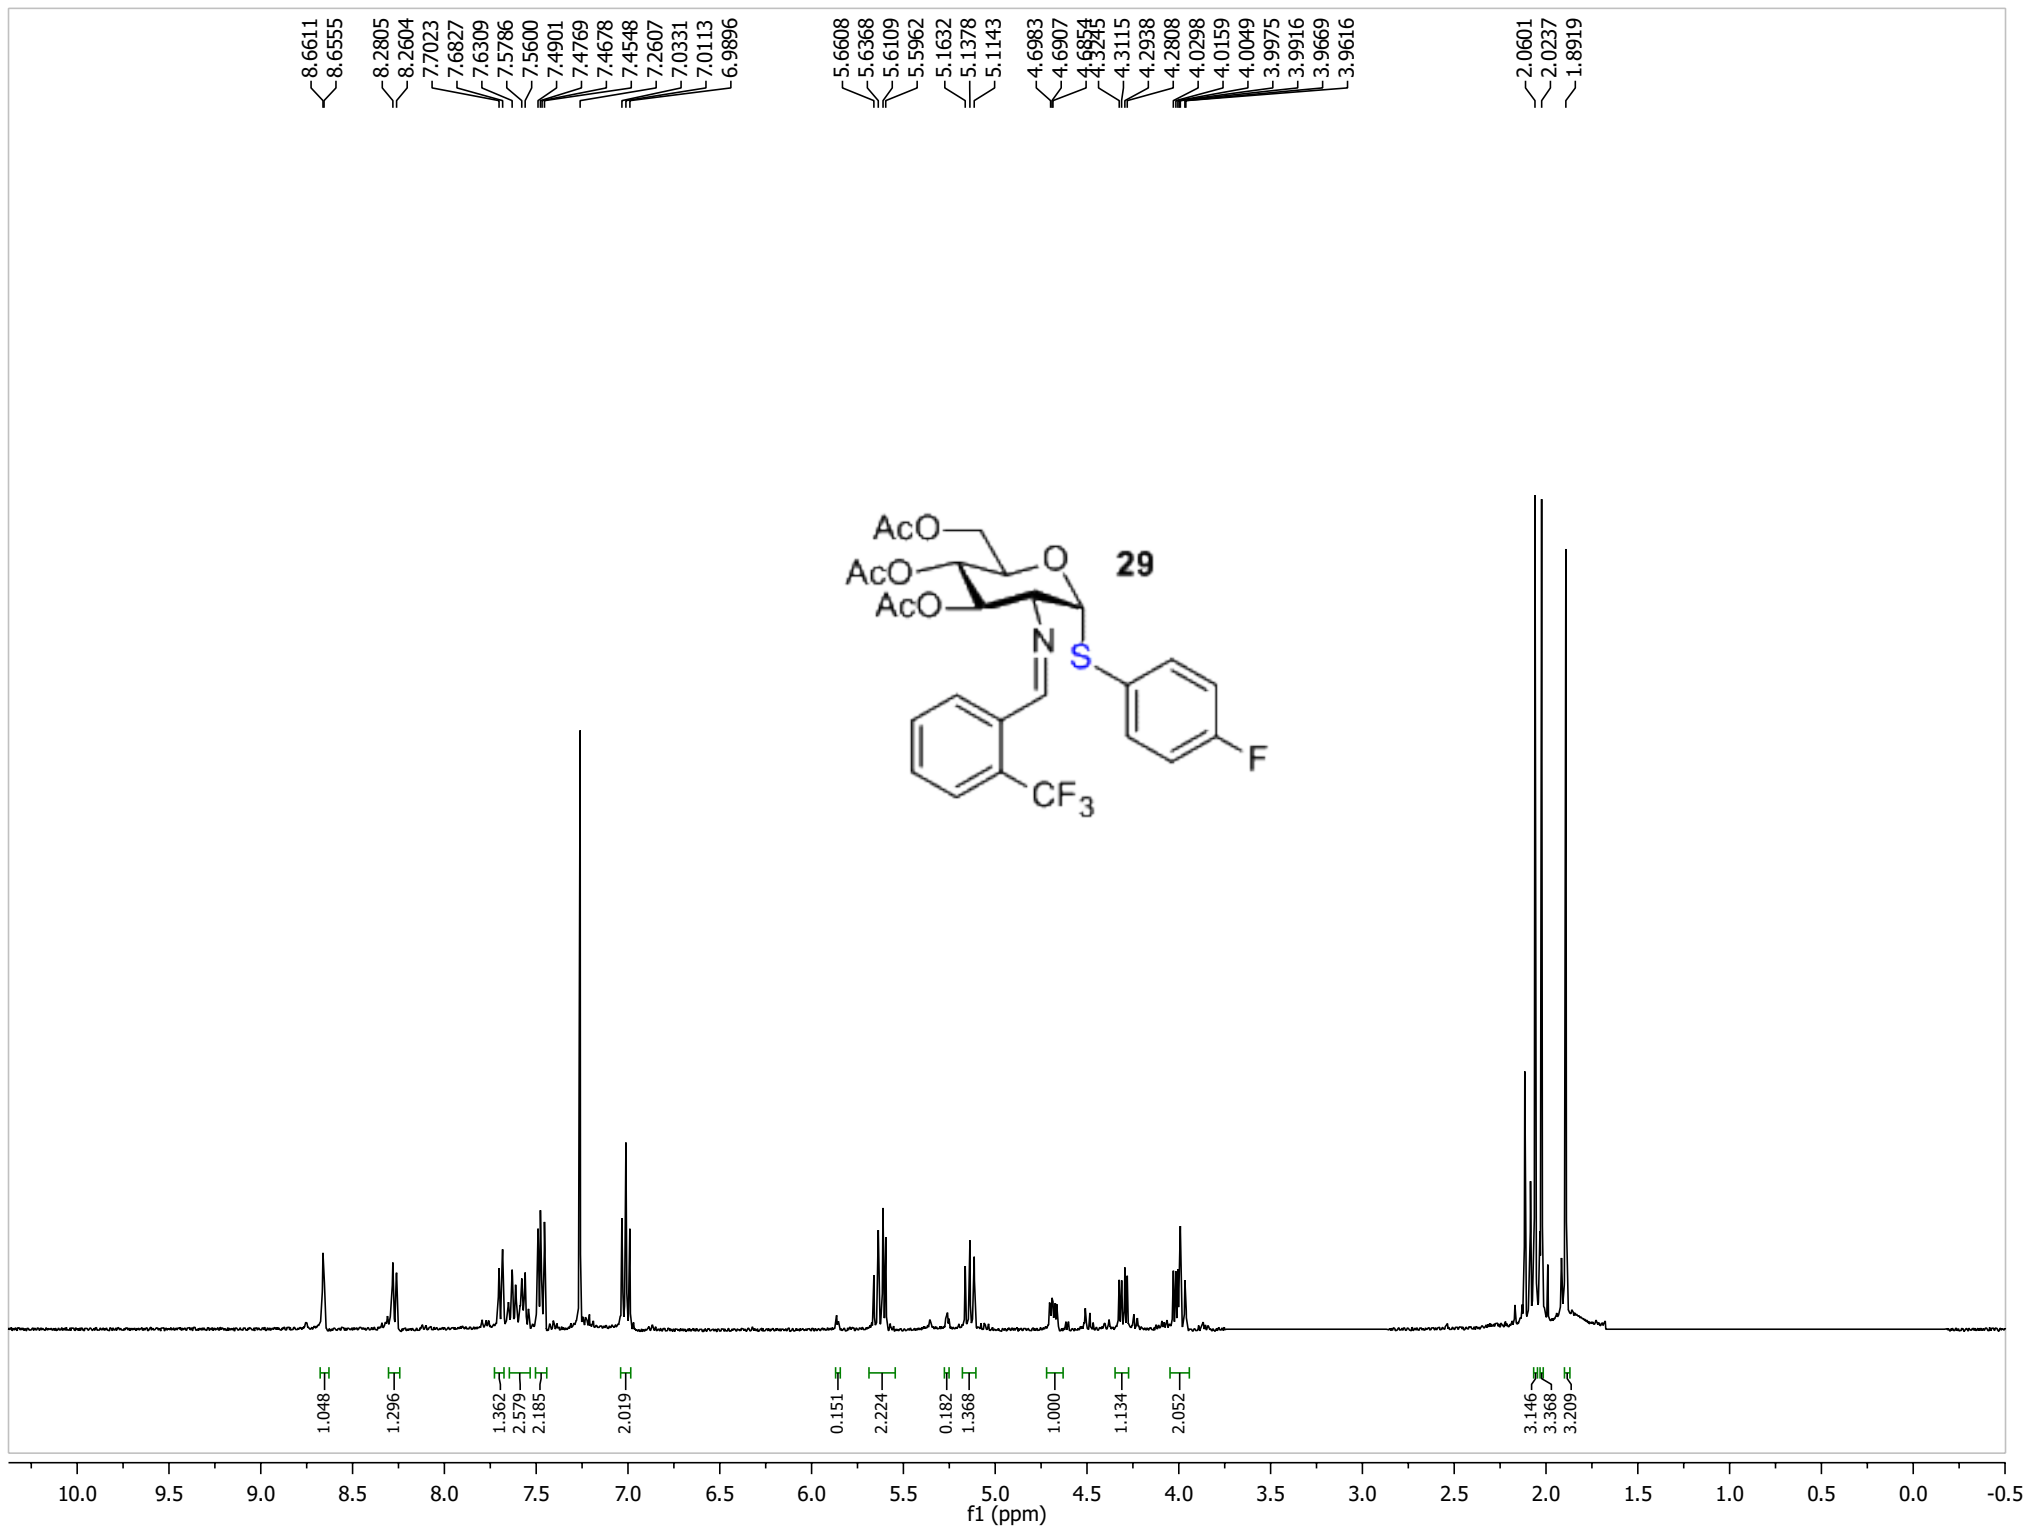

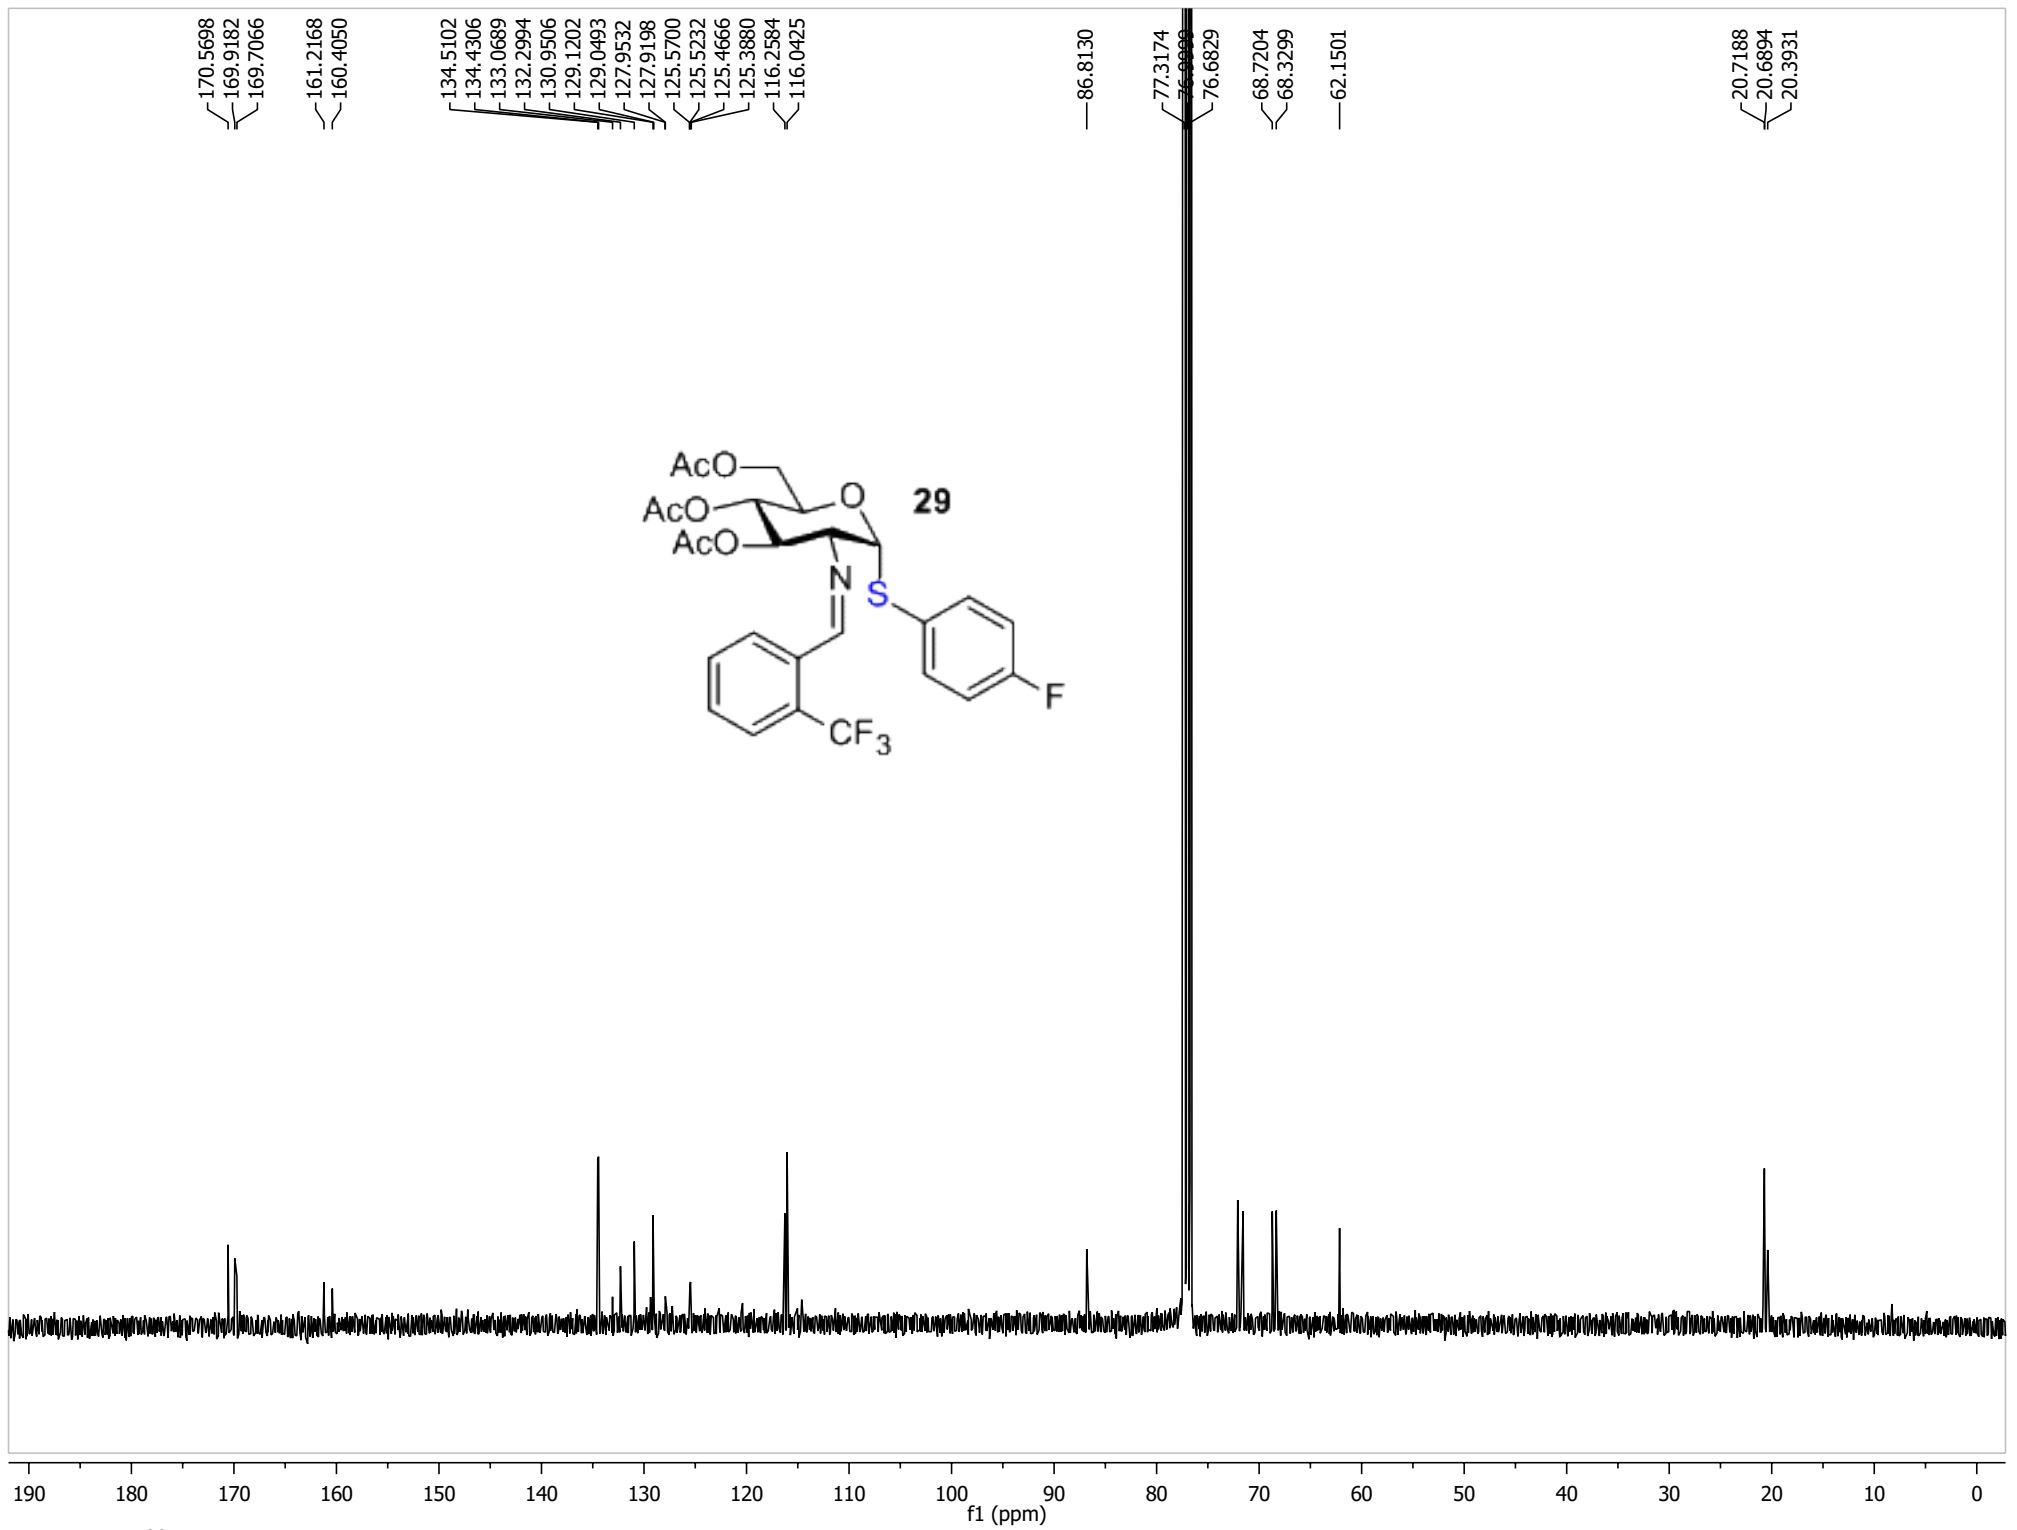

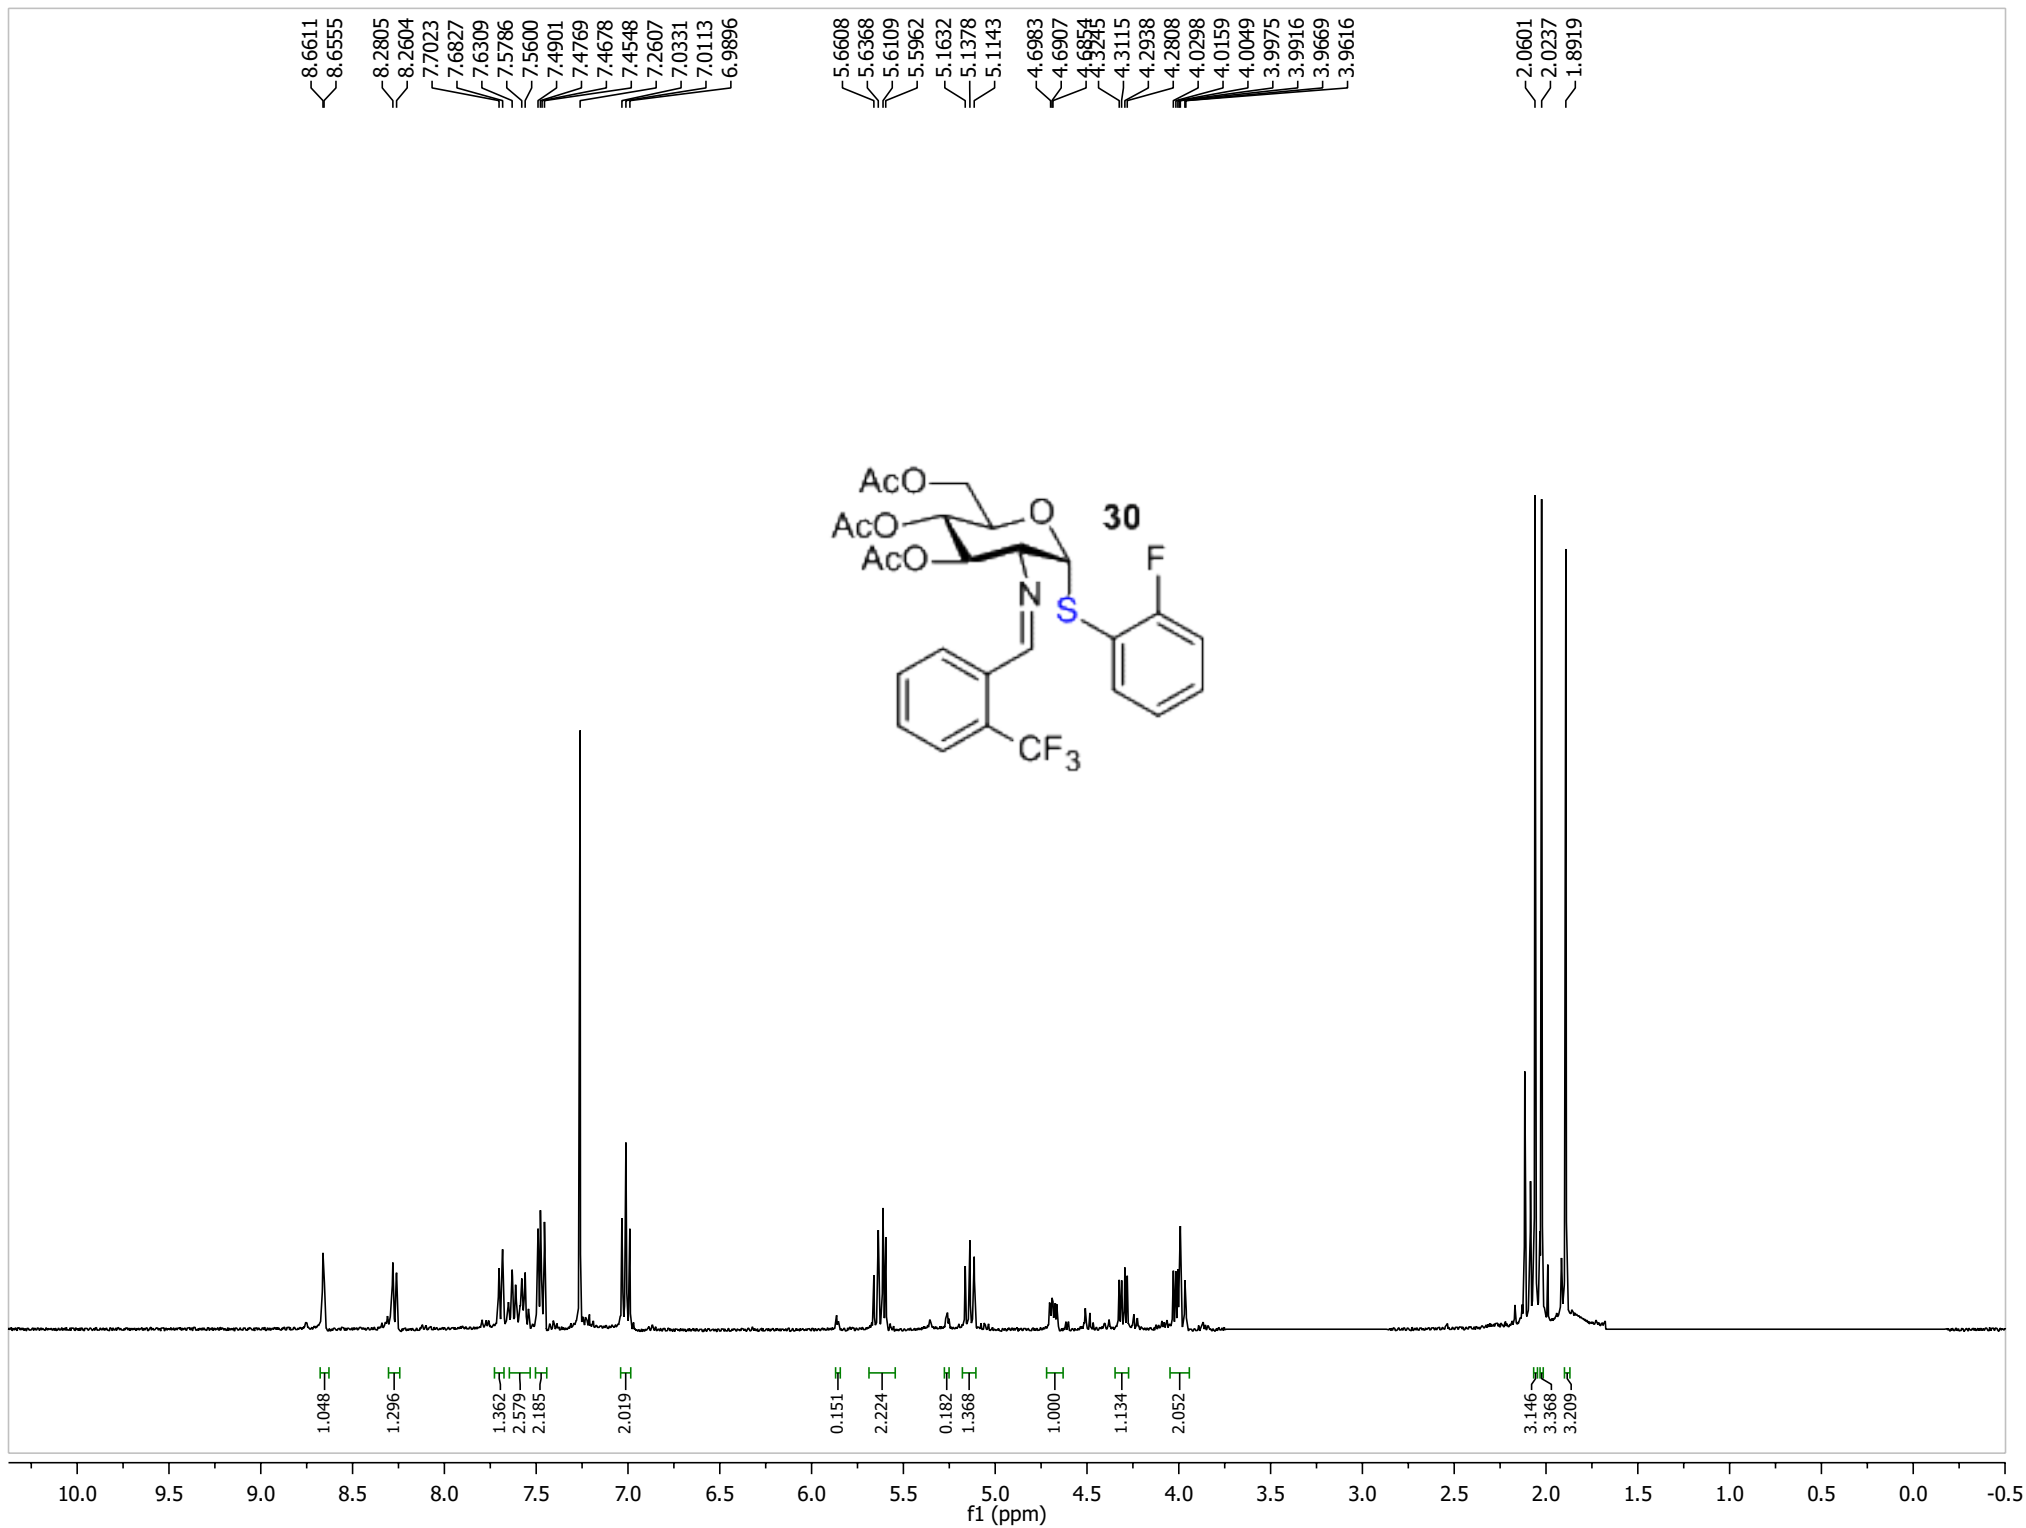

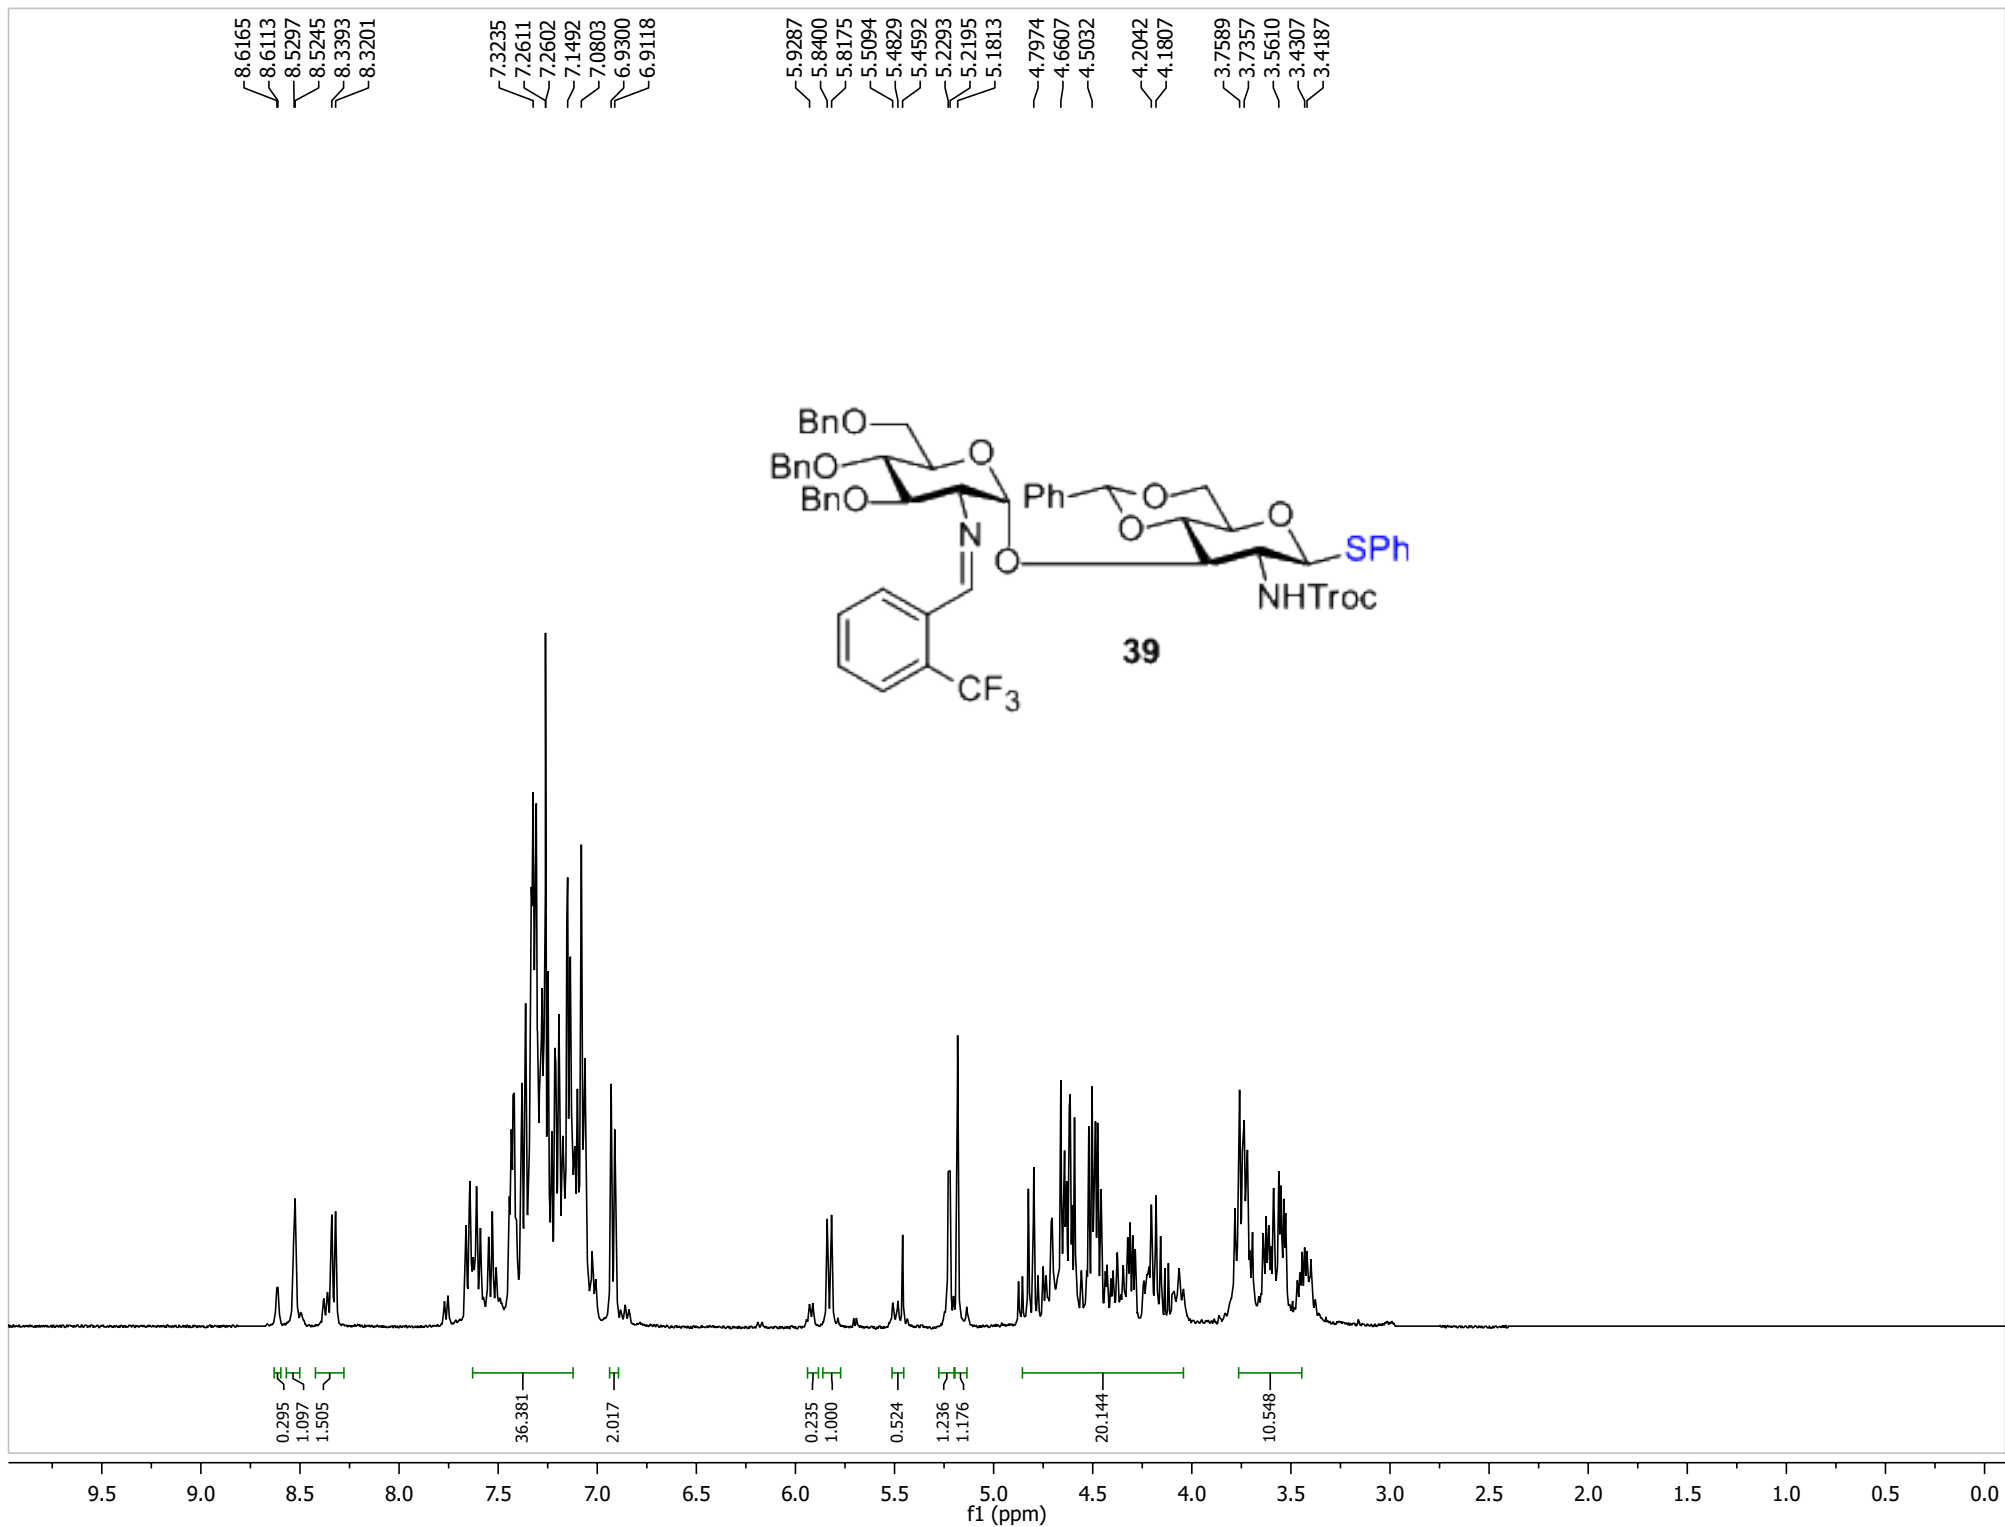

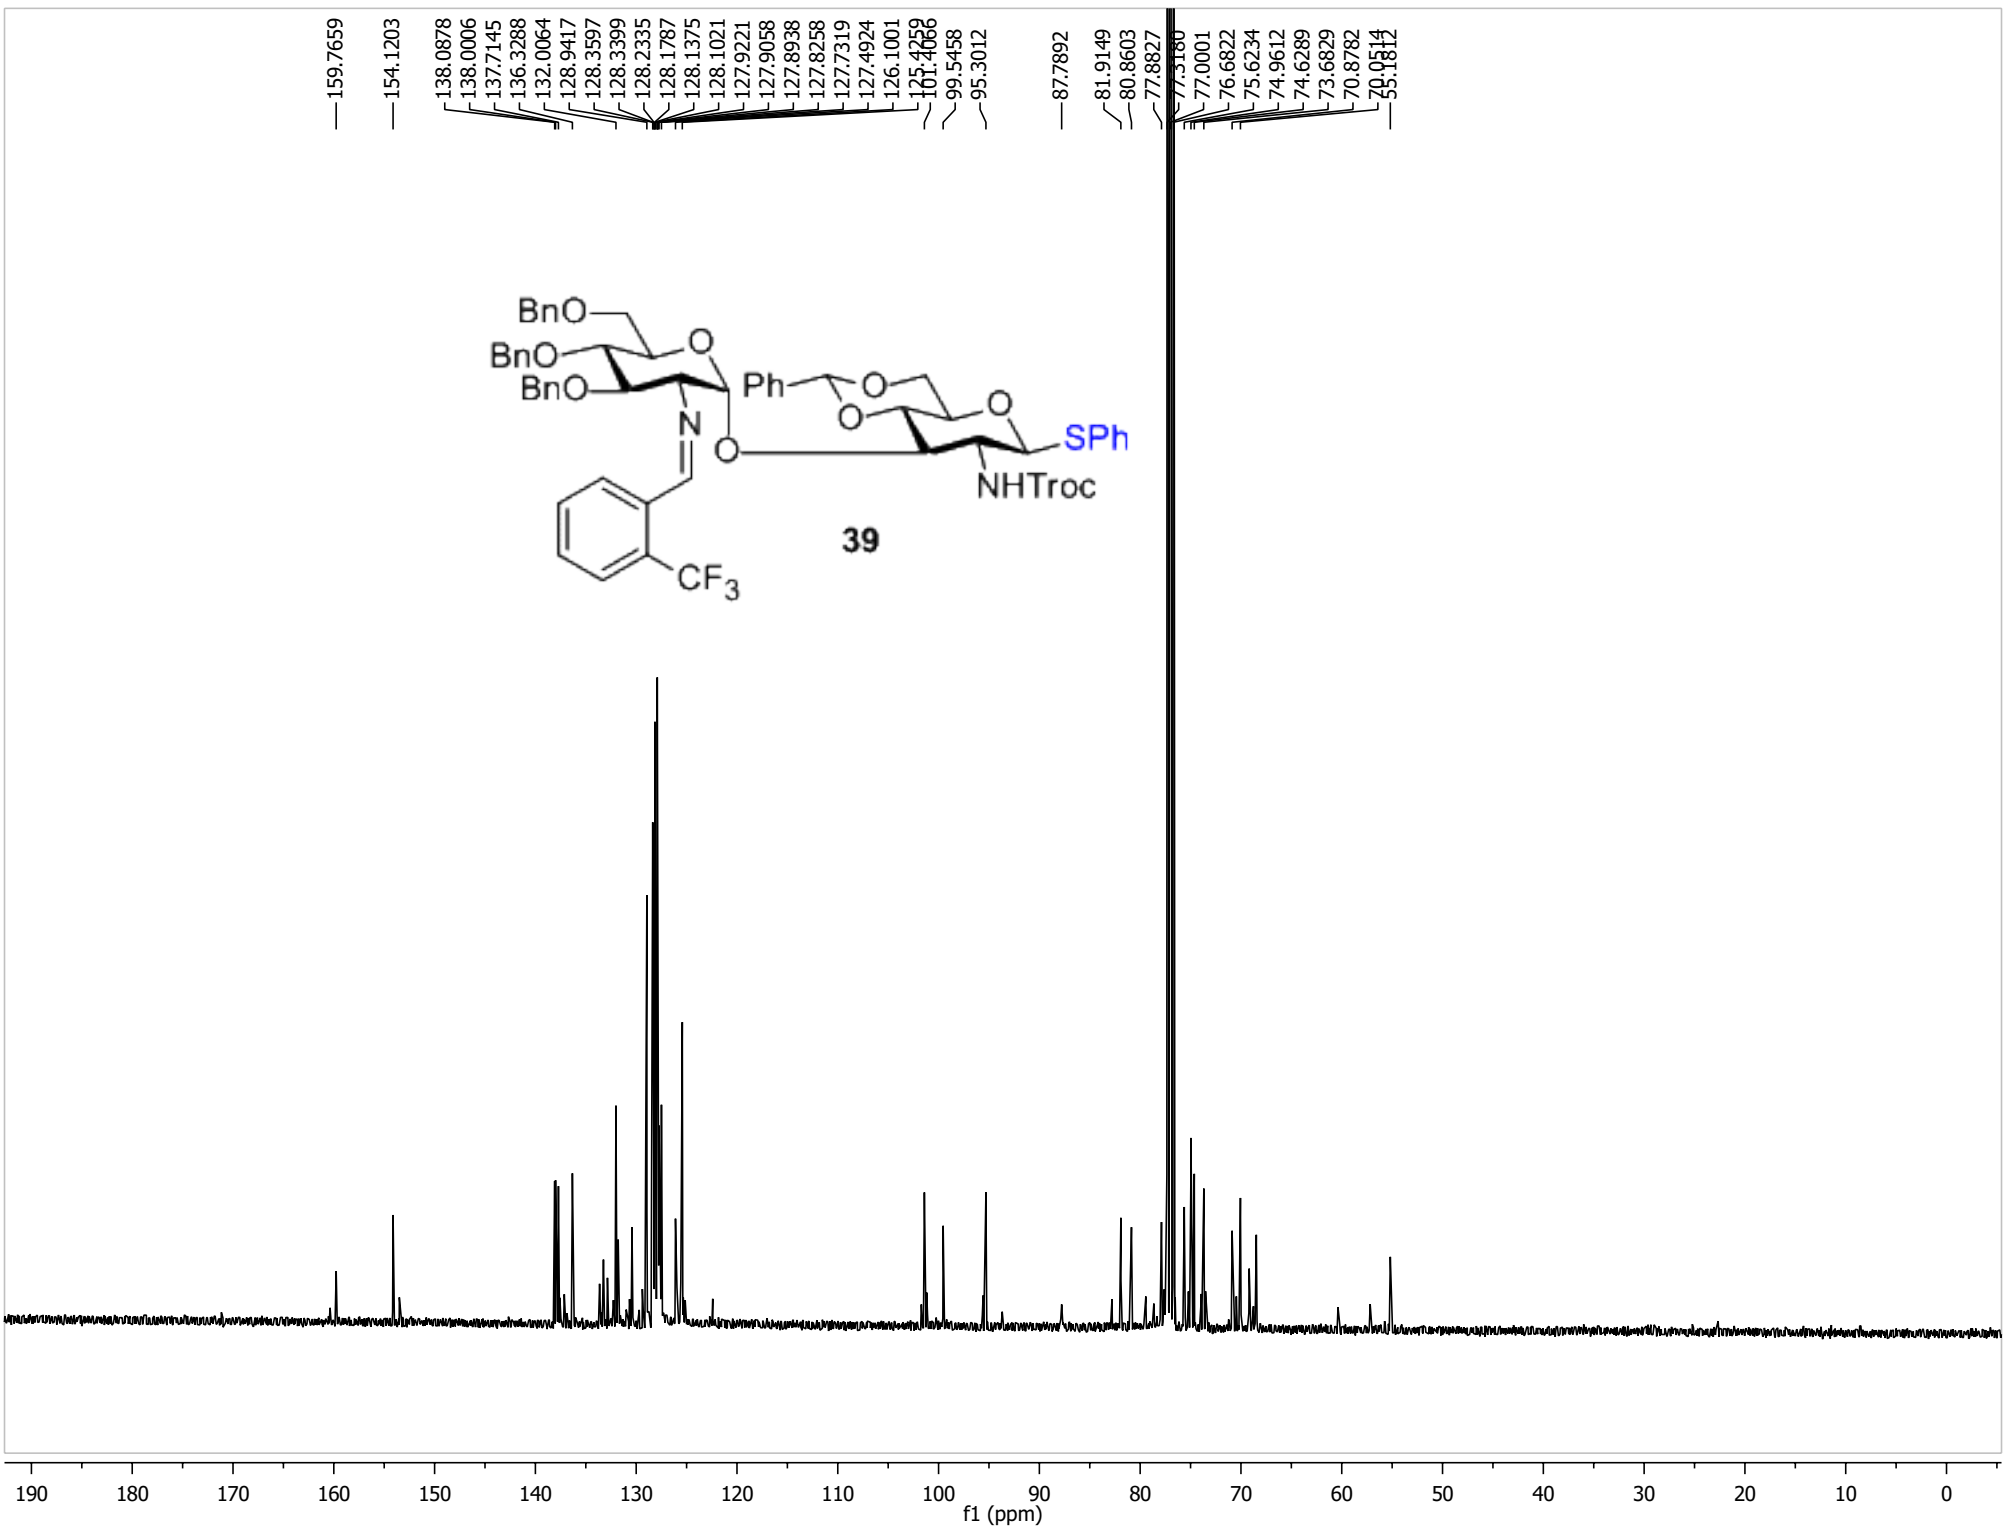

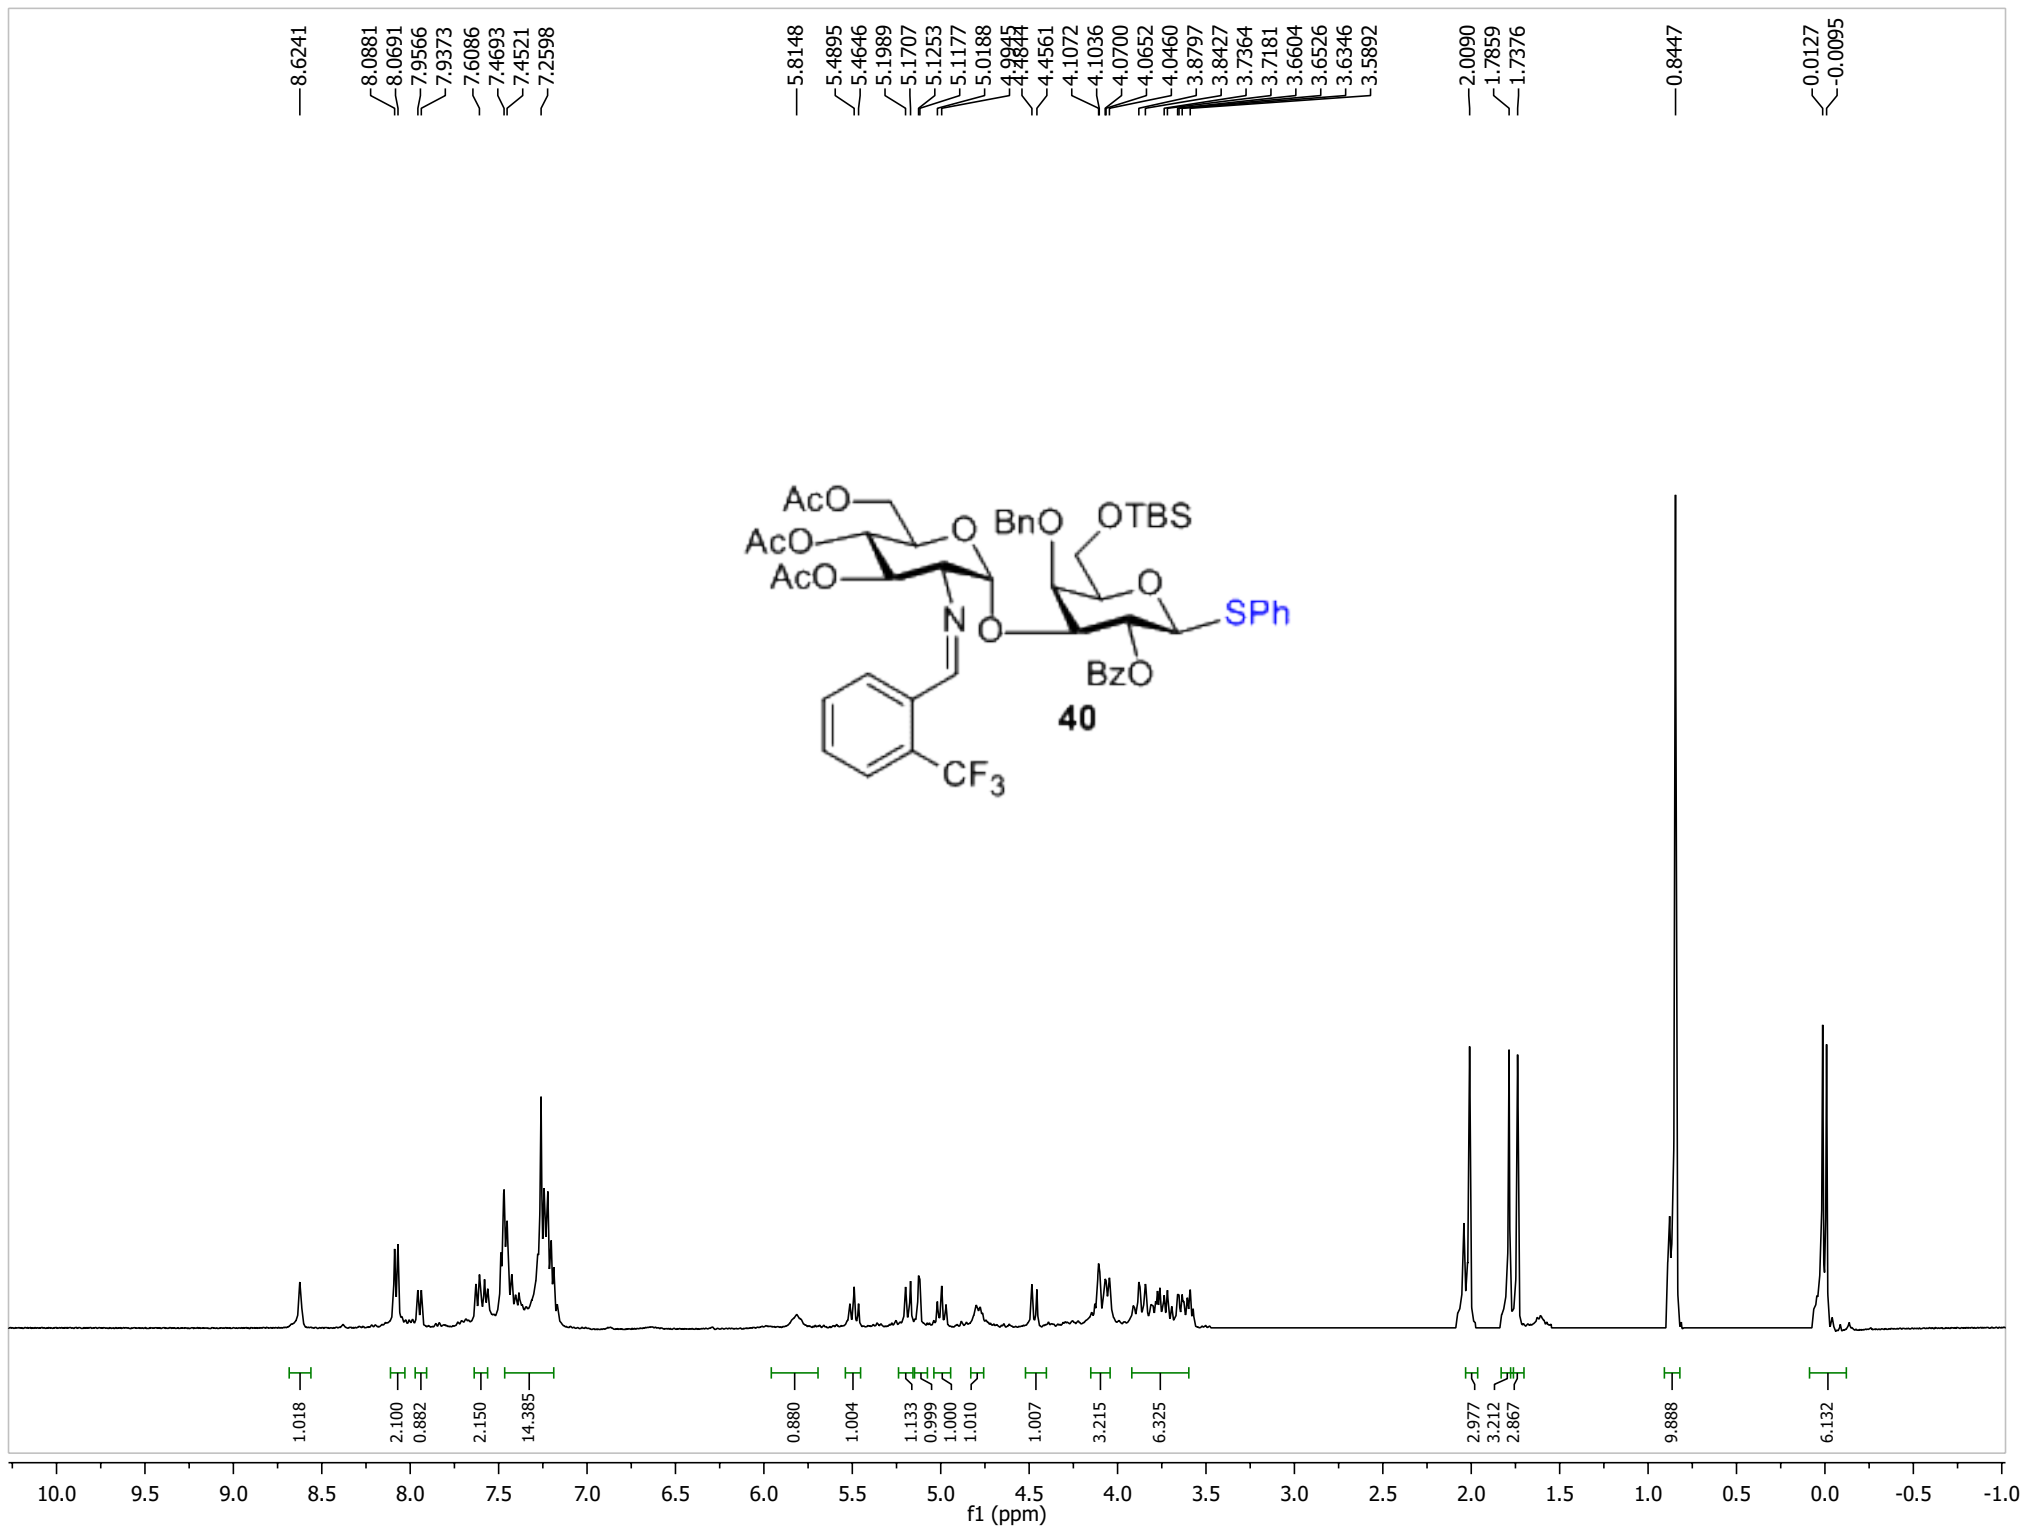

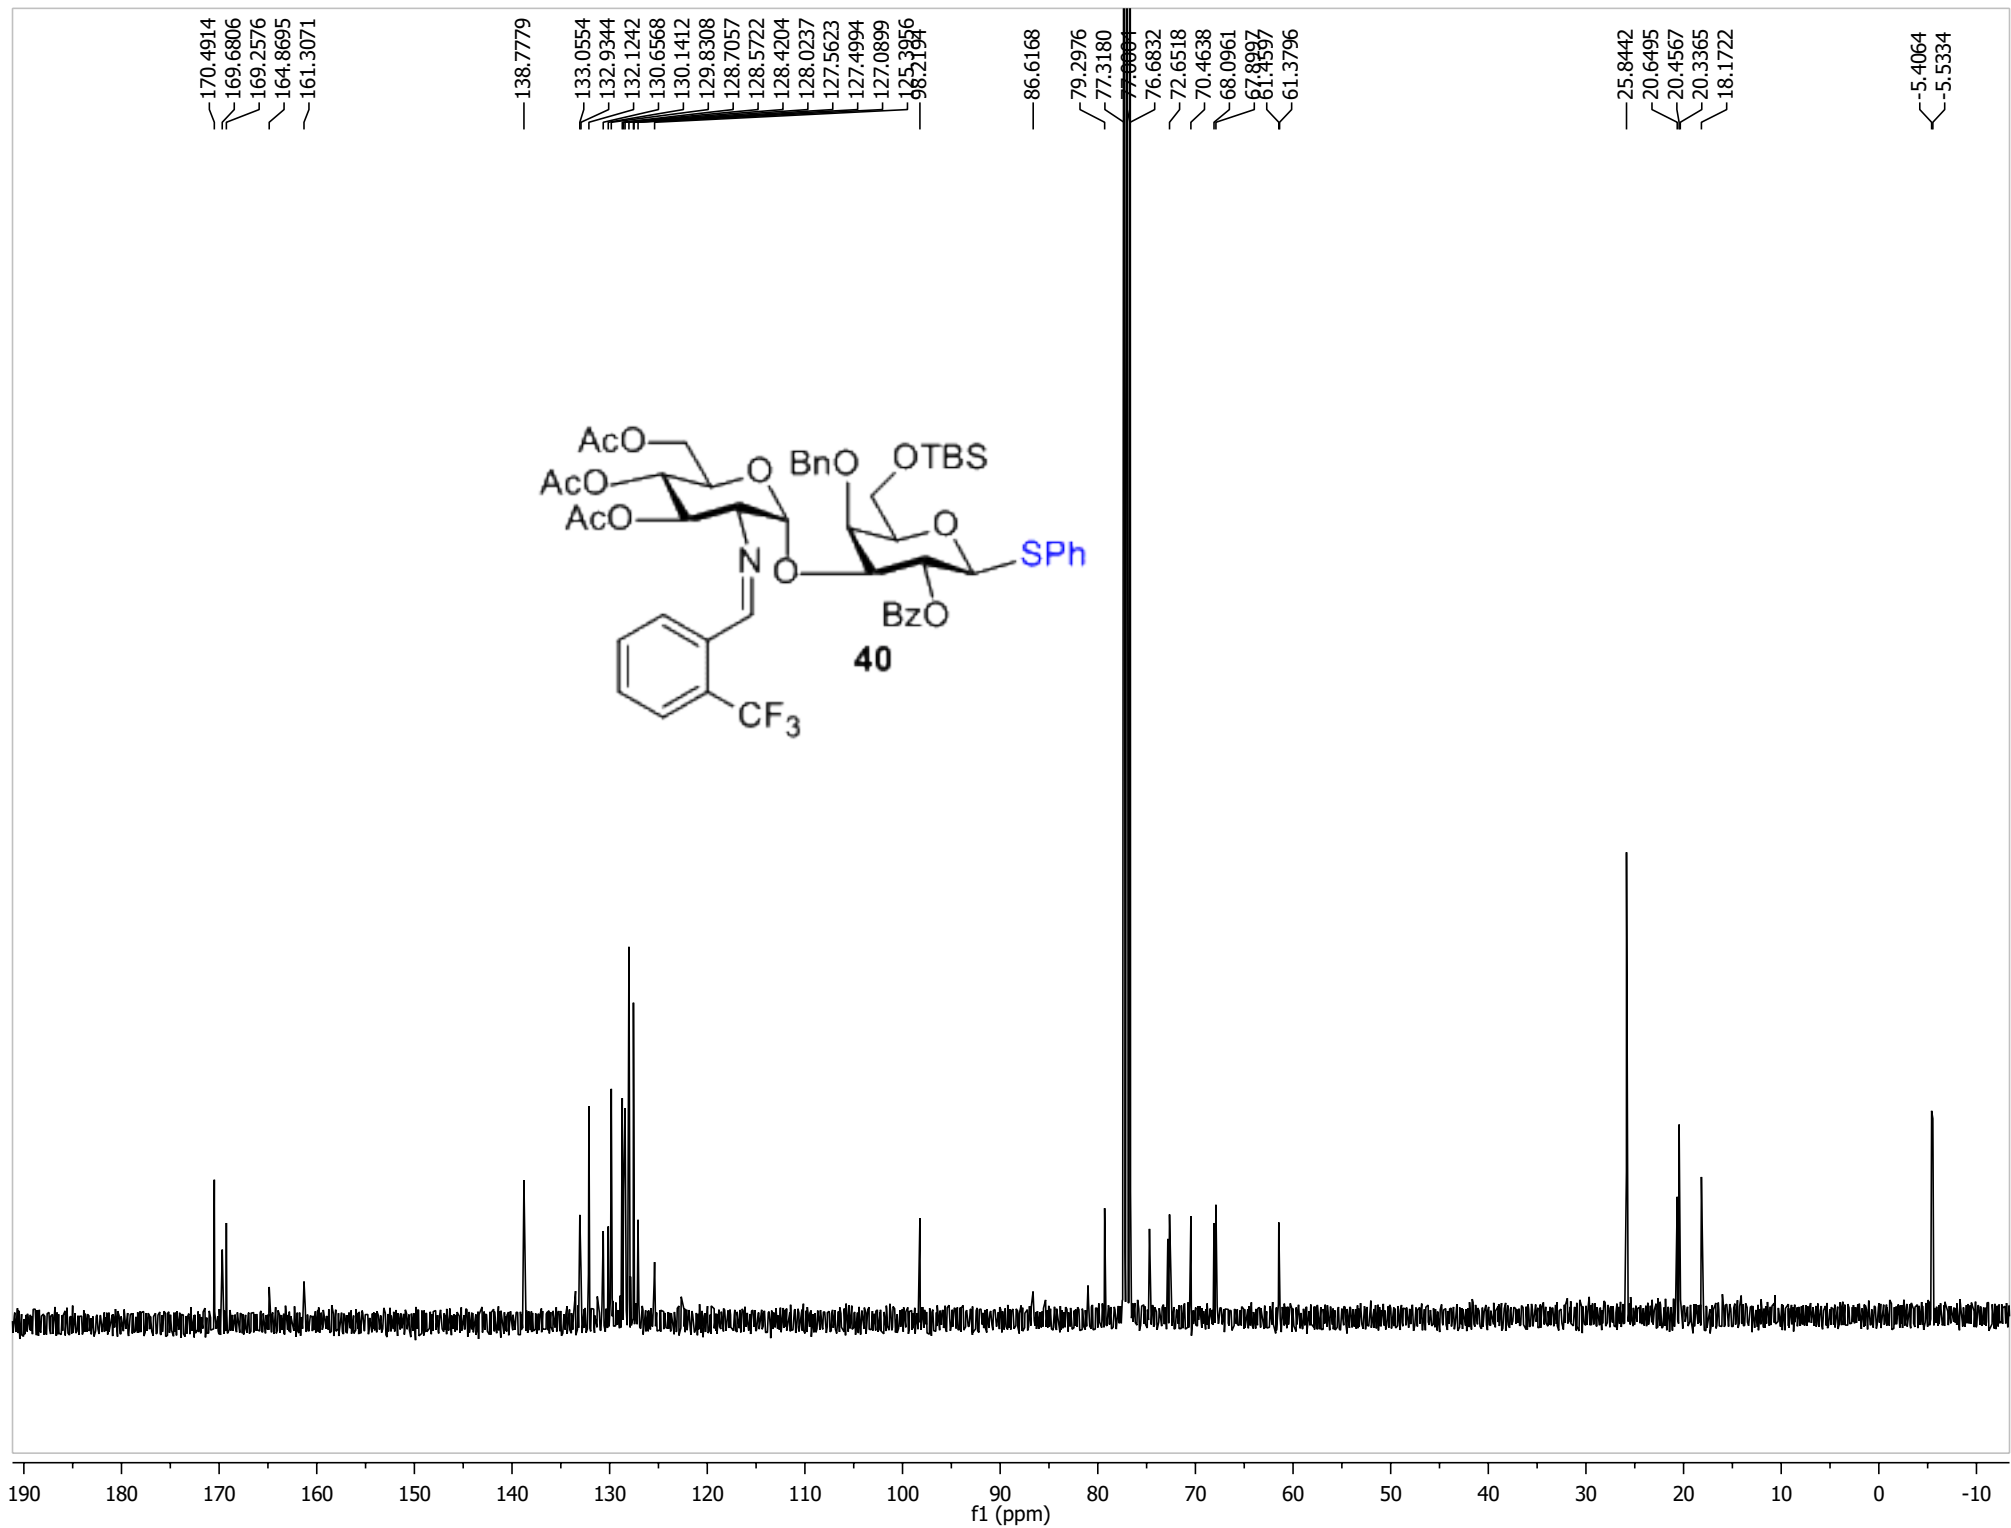

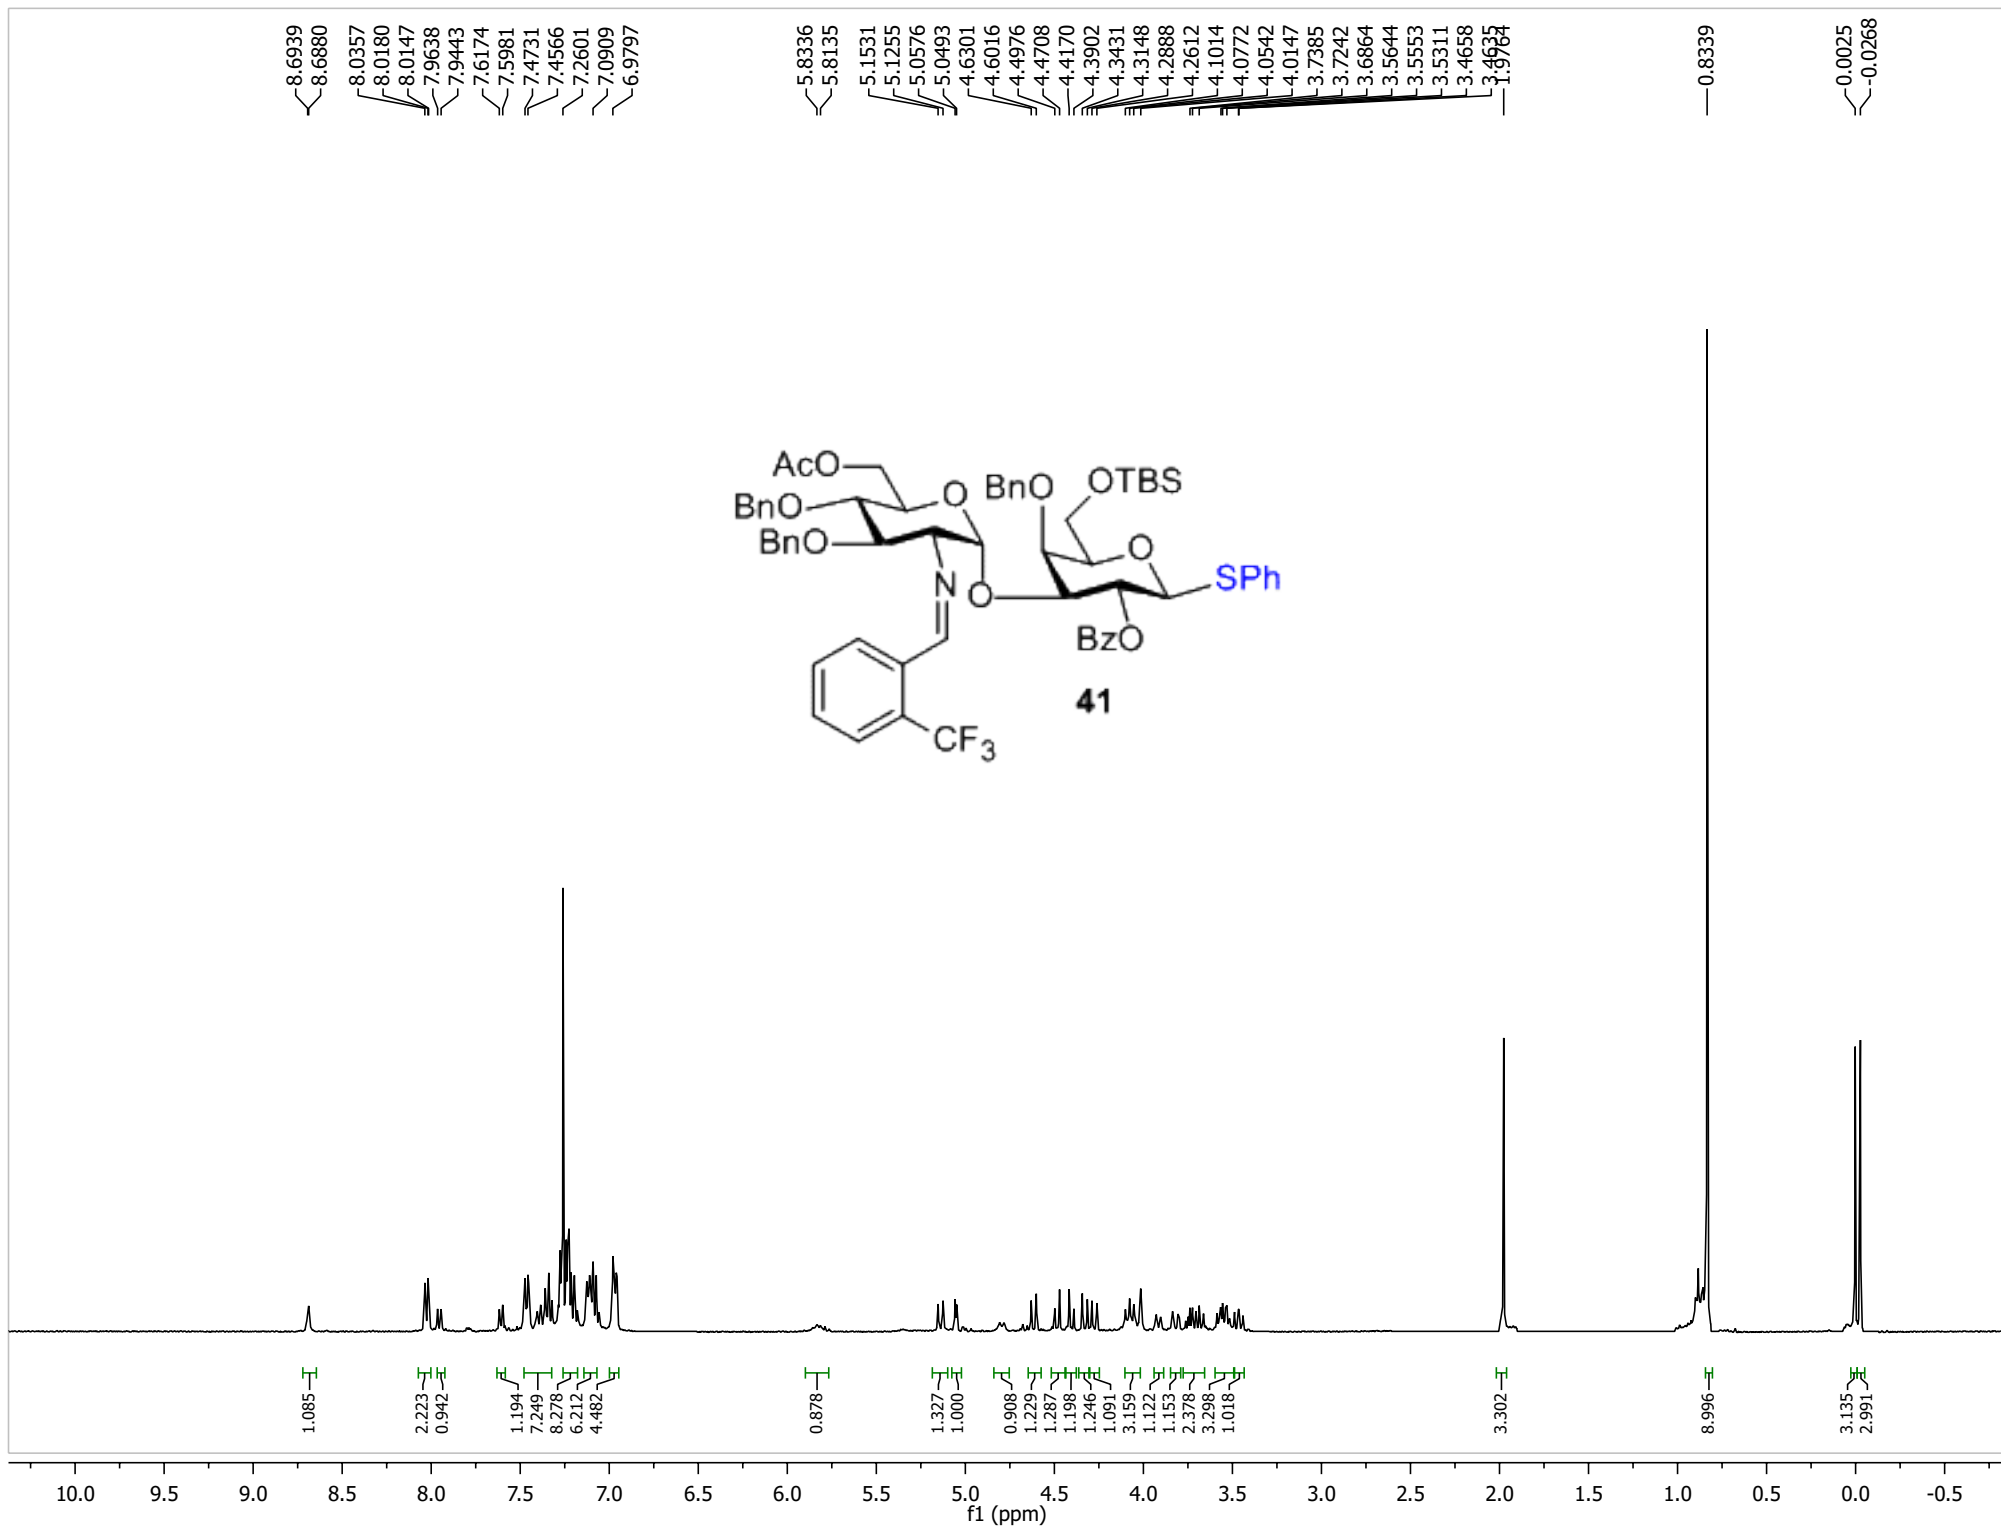



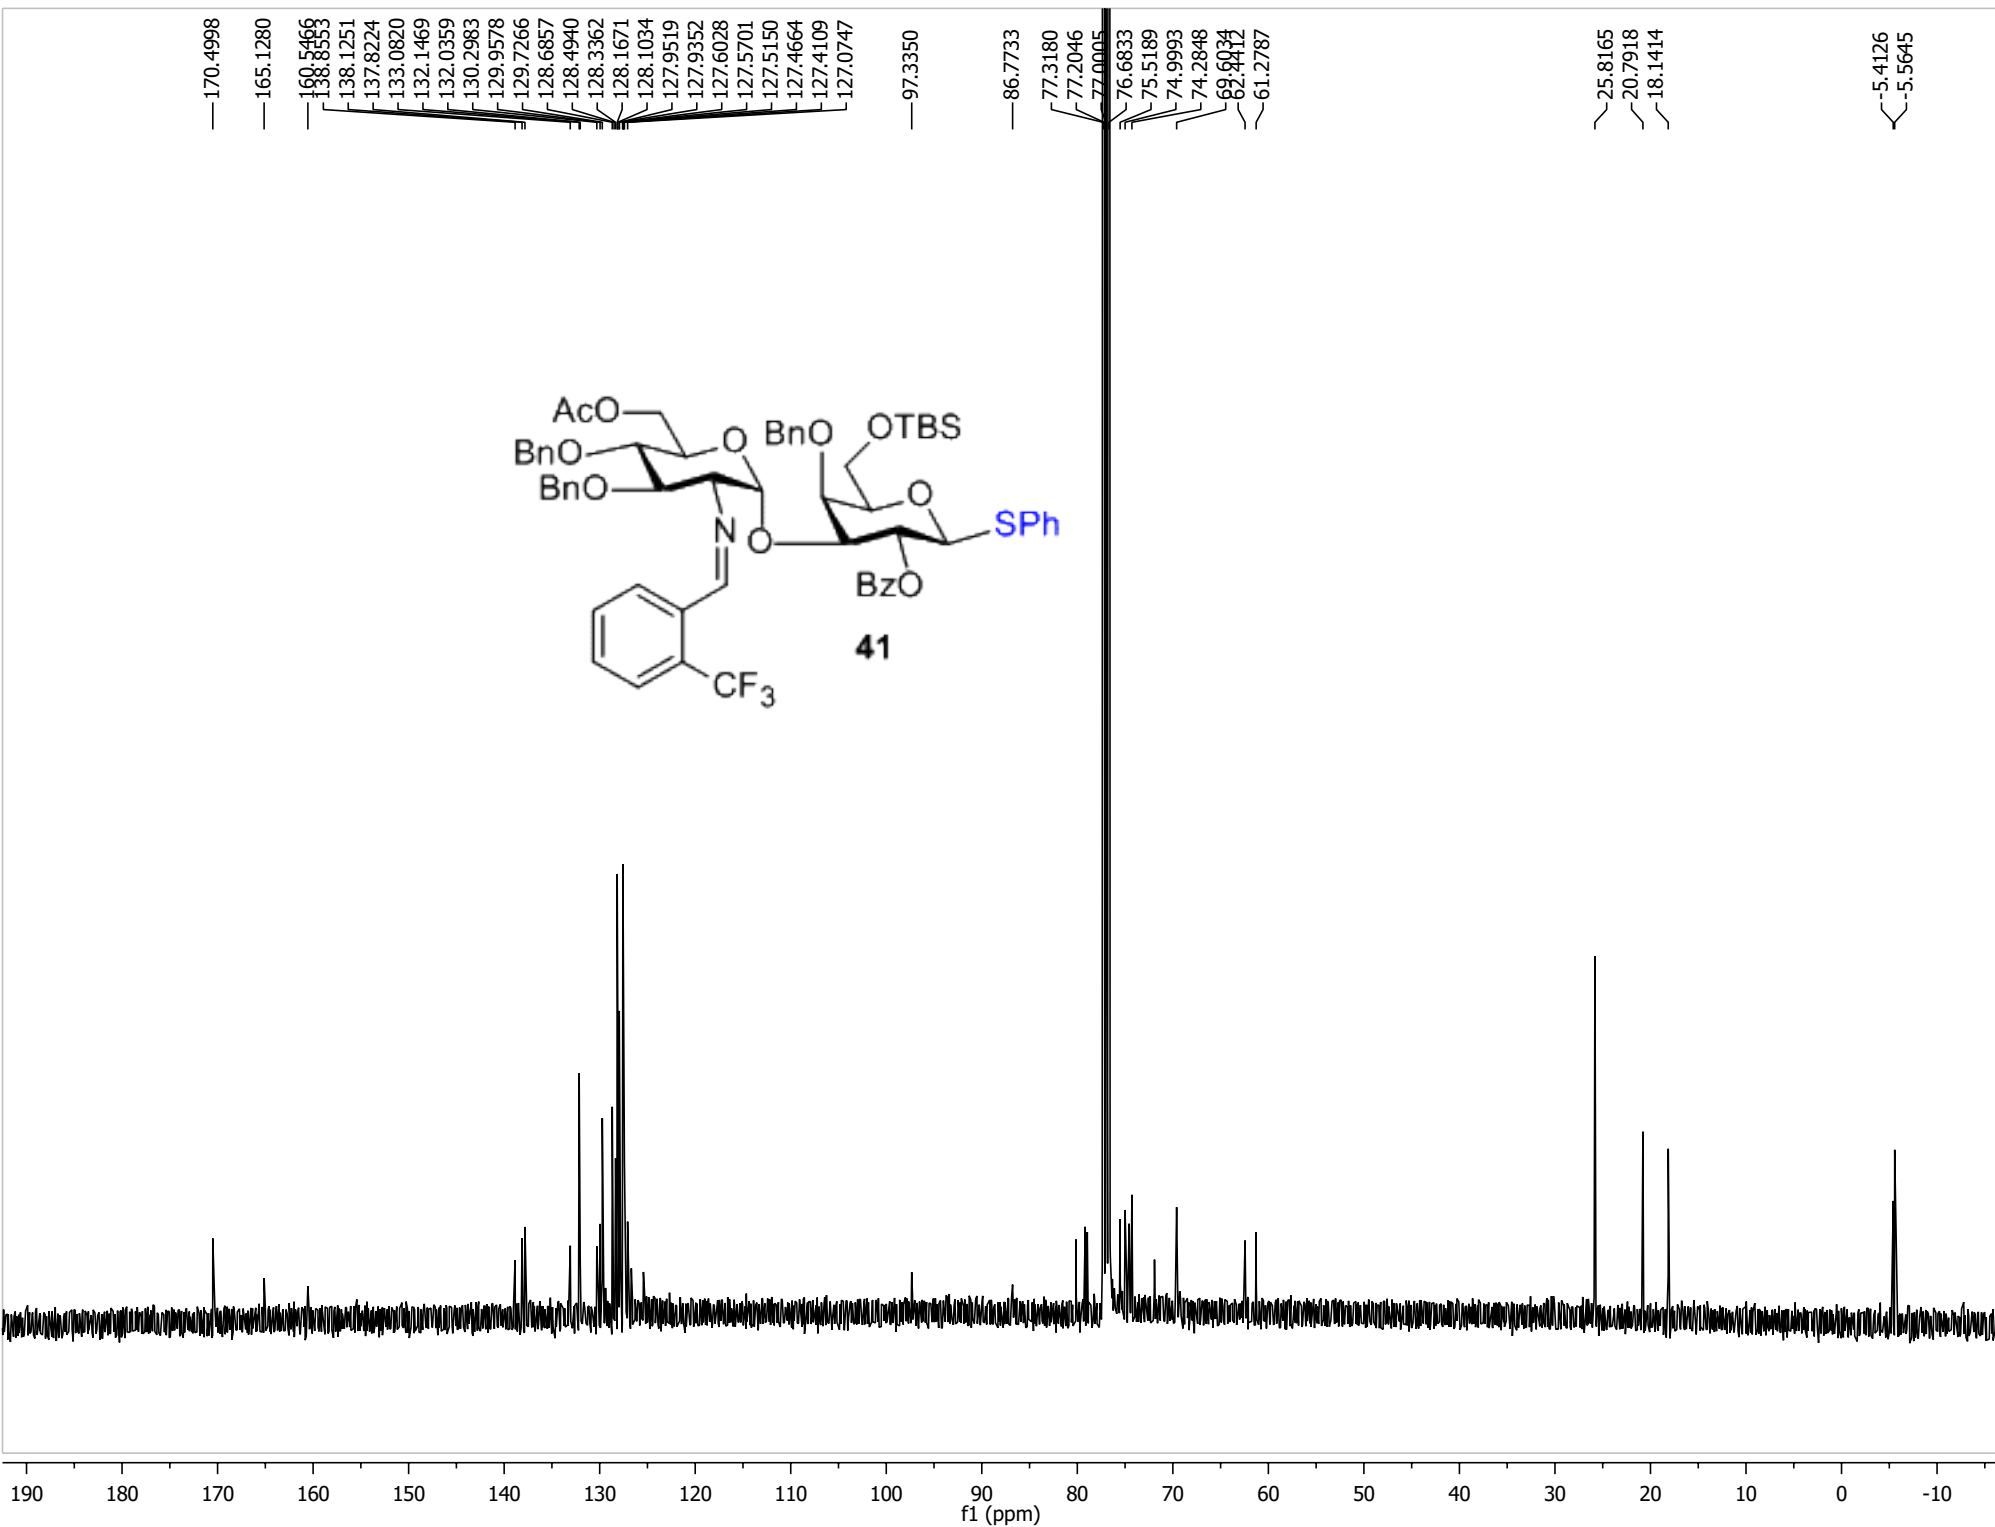

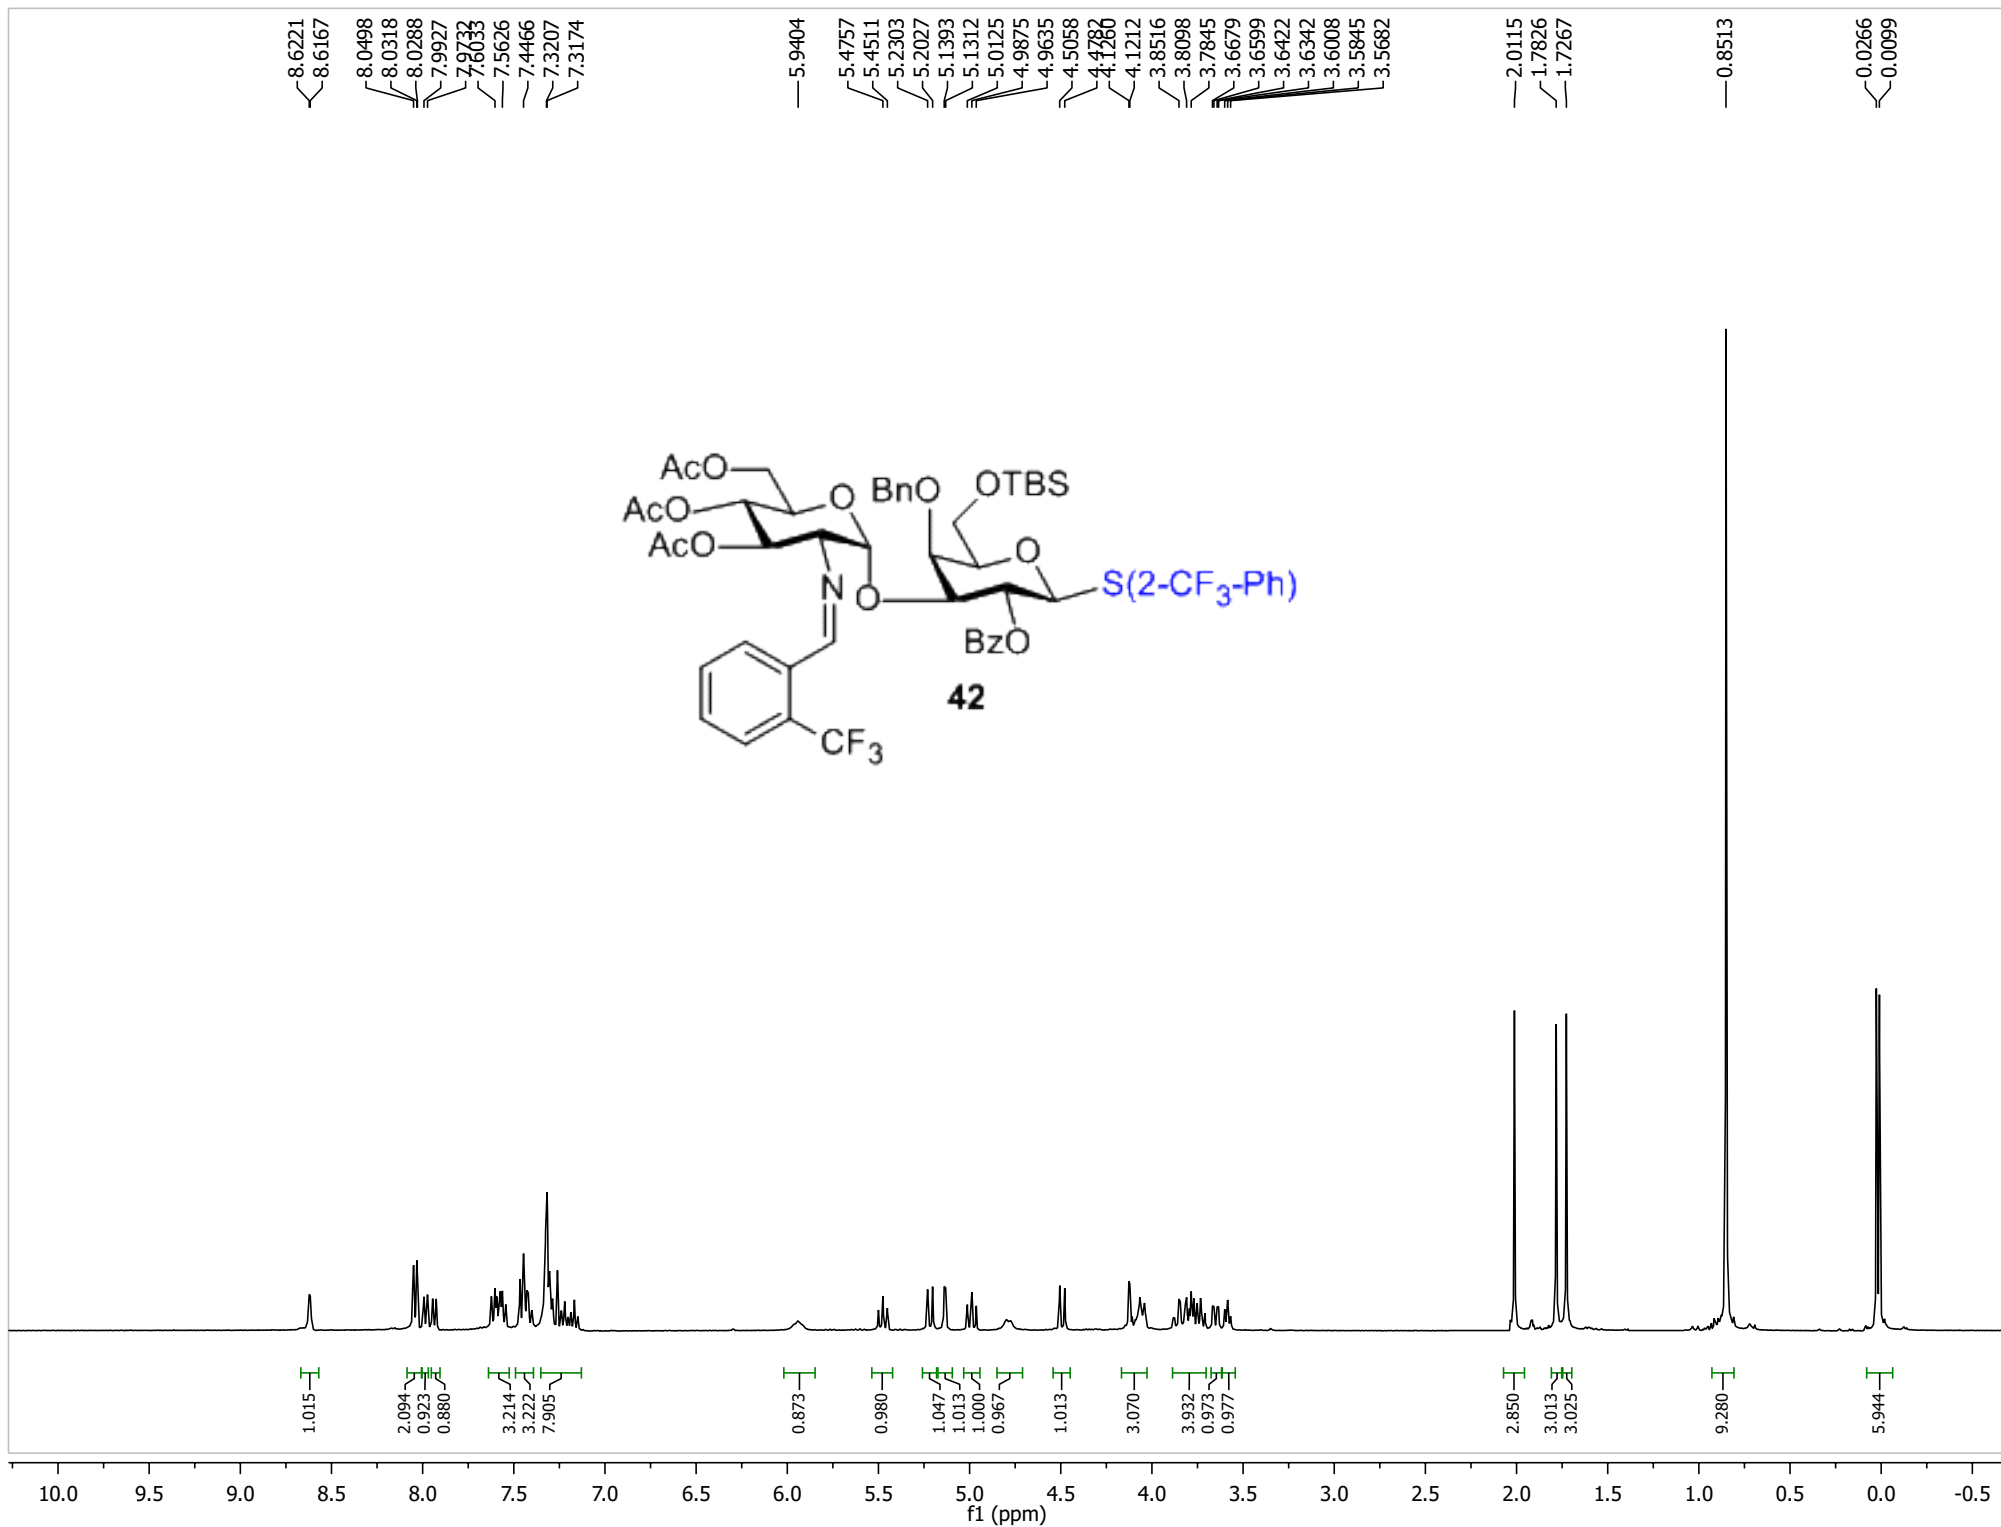

170.5076  
169.7118  
169.2422  
164.8420  
161.4018

138.6646  
134.0326  
132.9920  
132.1059  
131.9627  
130.6832  
129.8563  
129.7783  
128.5421  
128.2609  
128.1344  
127.9520  
127.3391  
127.1231  
126.4888  
126.4348  
126.3780  
126.3218  
125.4555  
125.3977  
125.3498  
96.1253

80.8949  
79.3088  
77.3173  
77.2049  
76.9996  
76.6821  
74.8261  
72.6415  
70.3750  
68.0653  
67.807  
67.467  
61.3041

25.8287  
20.6548  
20.4651  
20.3516  
18.1712

-5.4014  
-5.5348

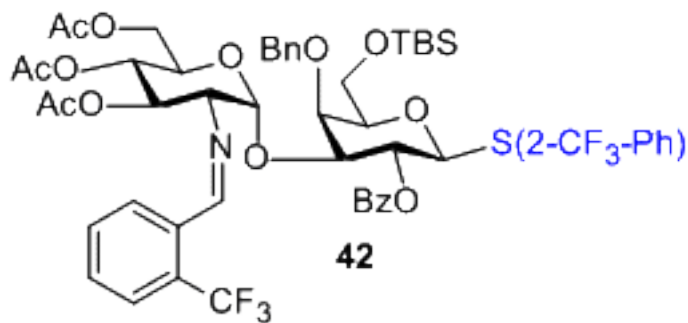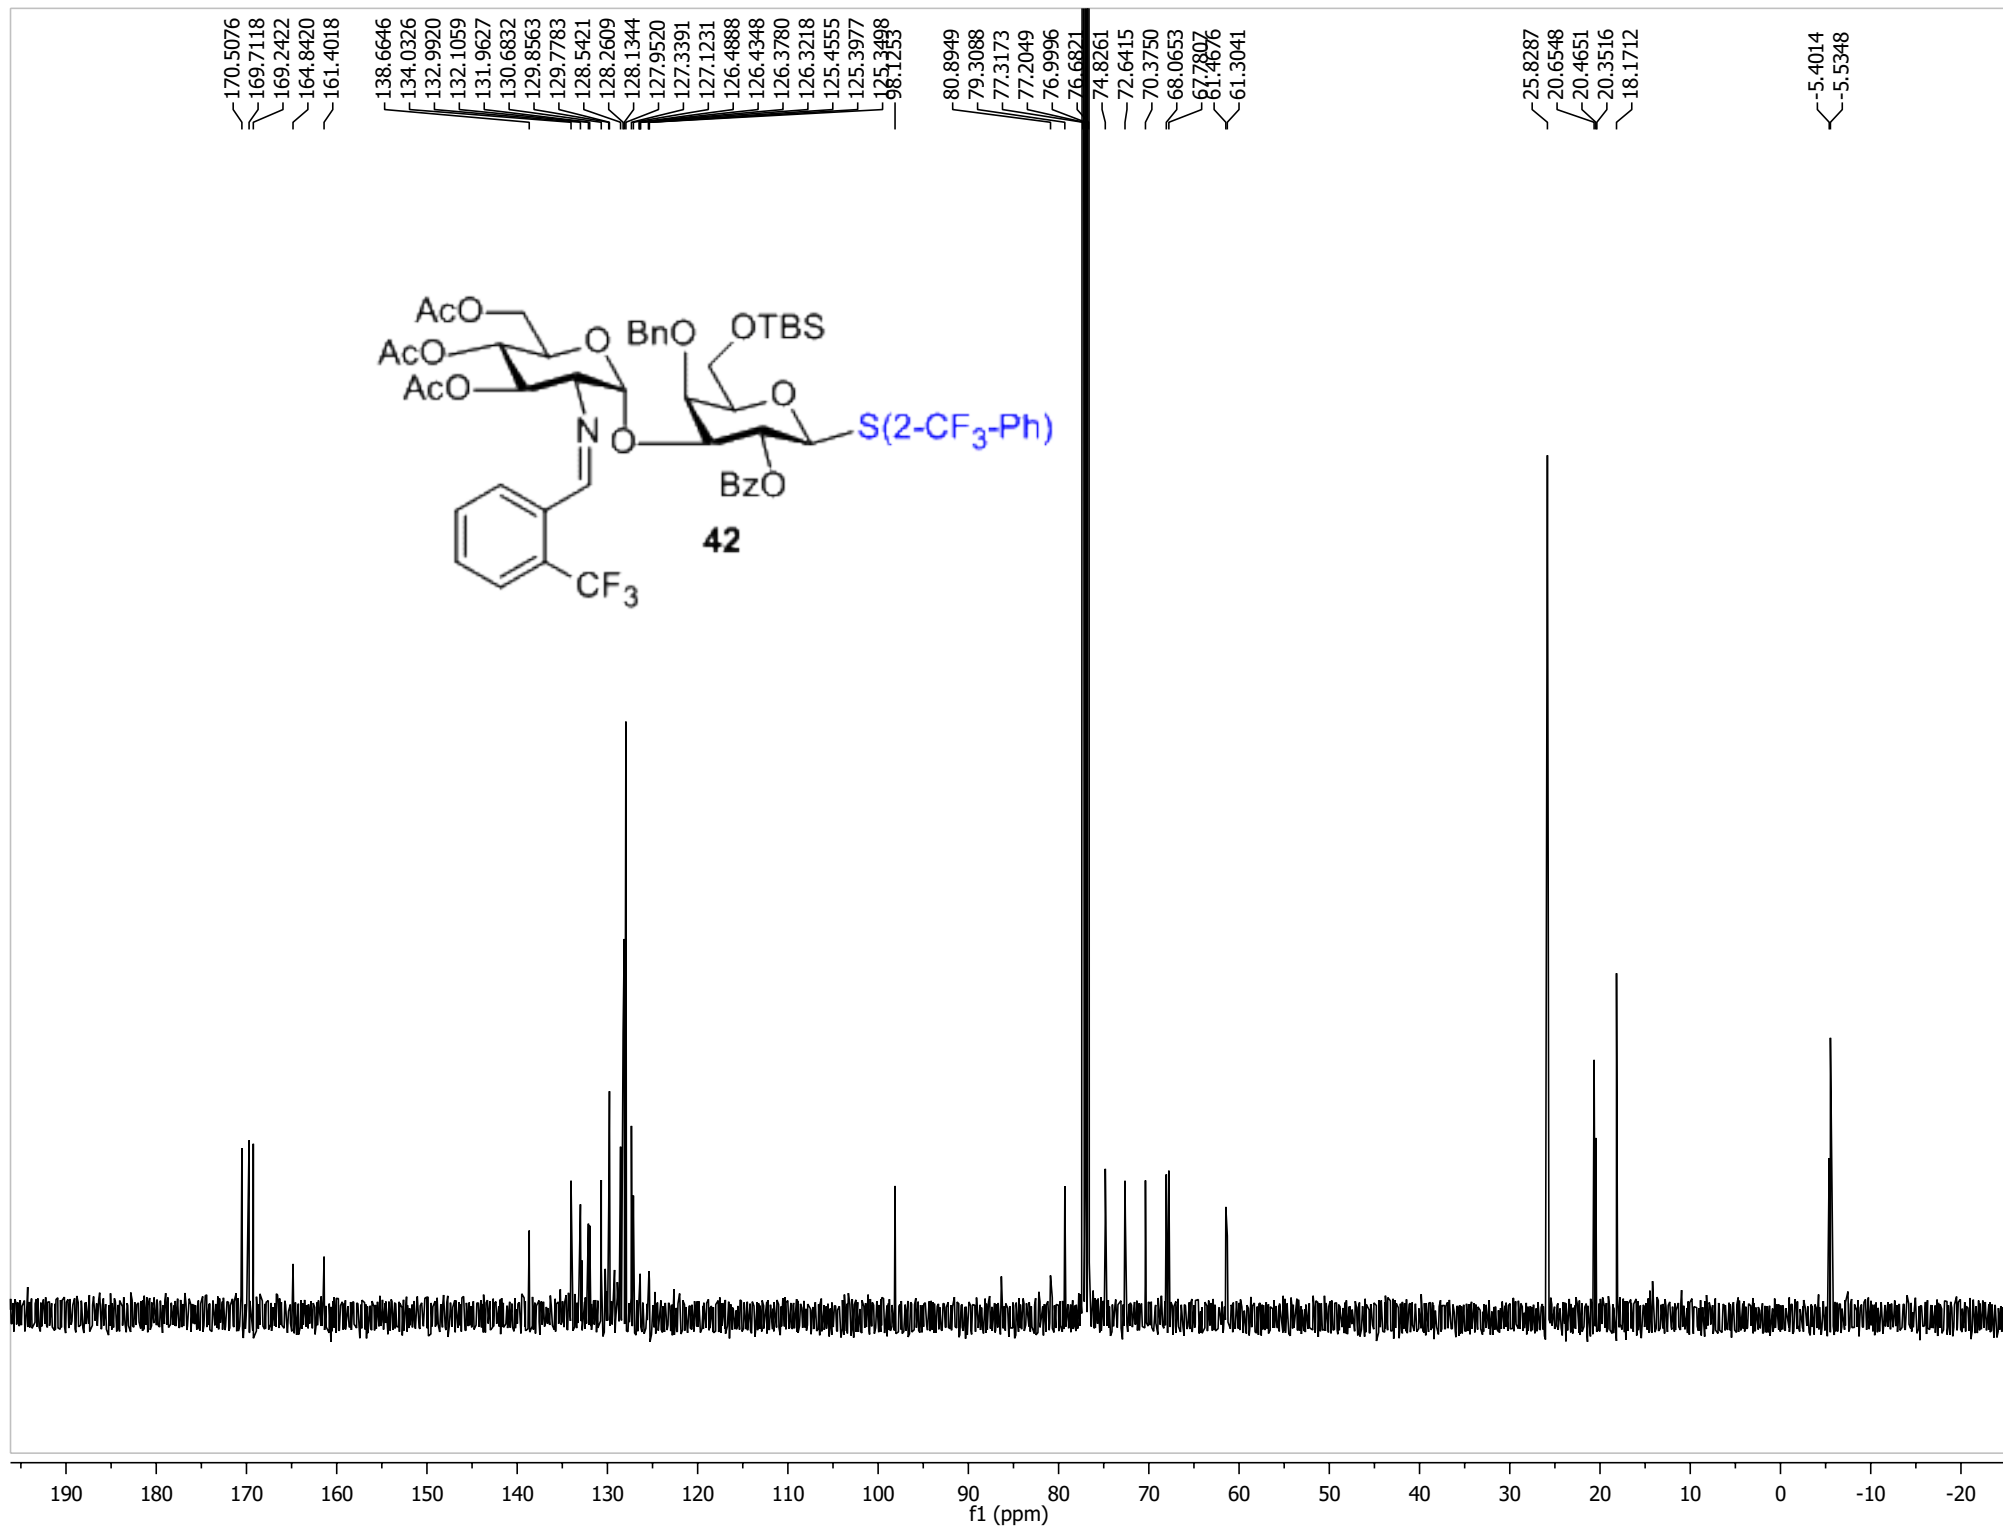

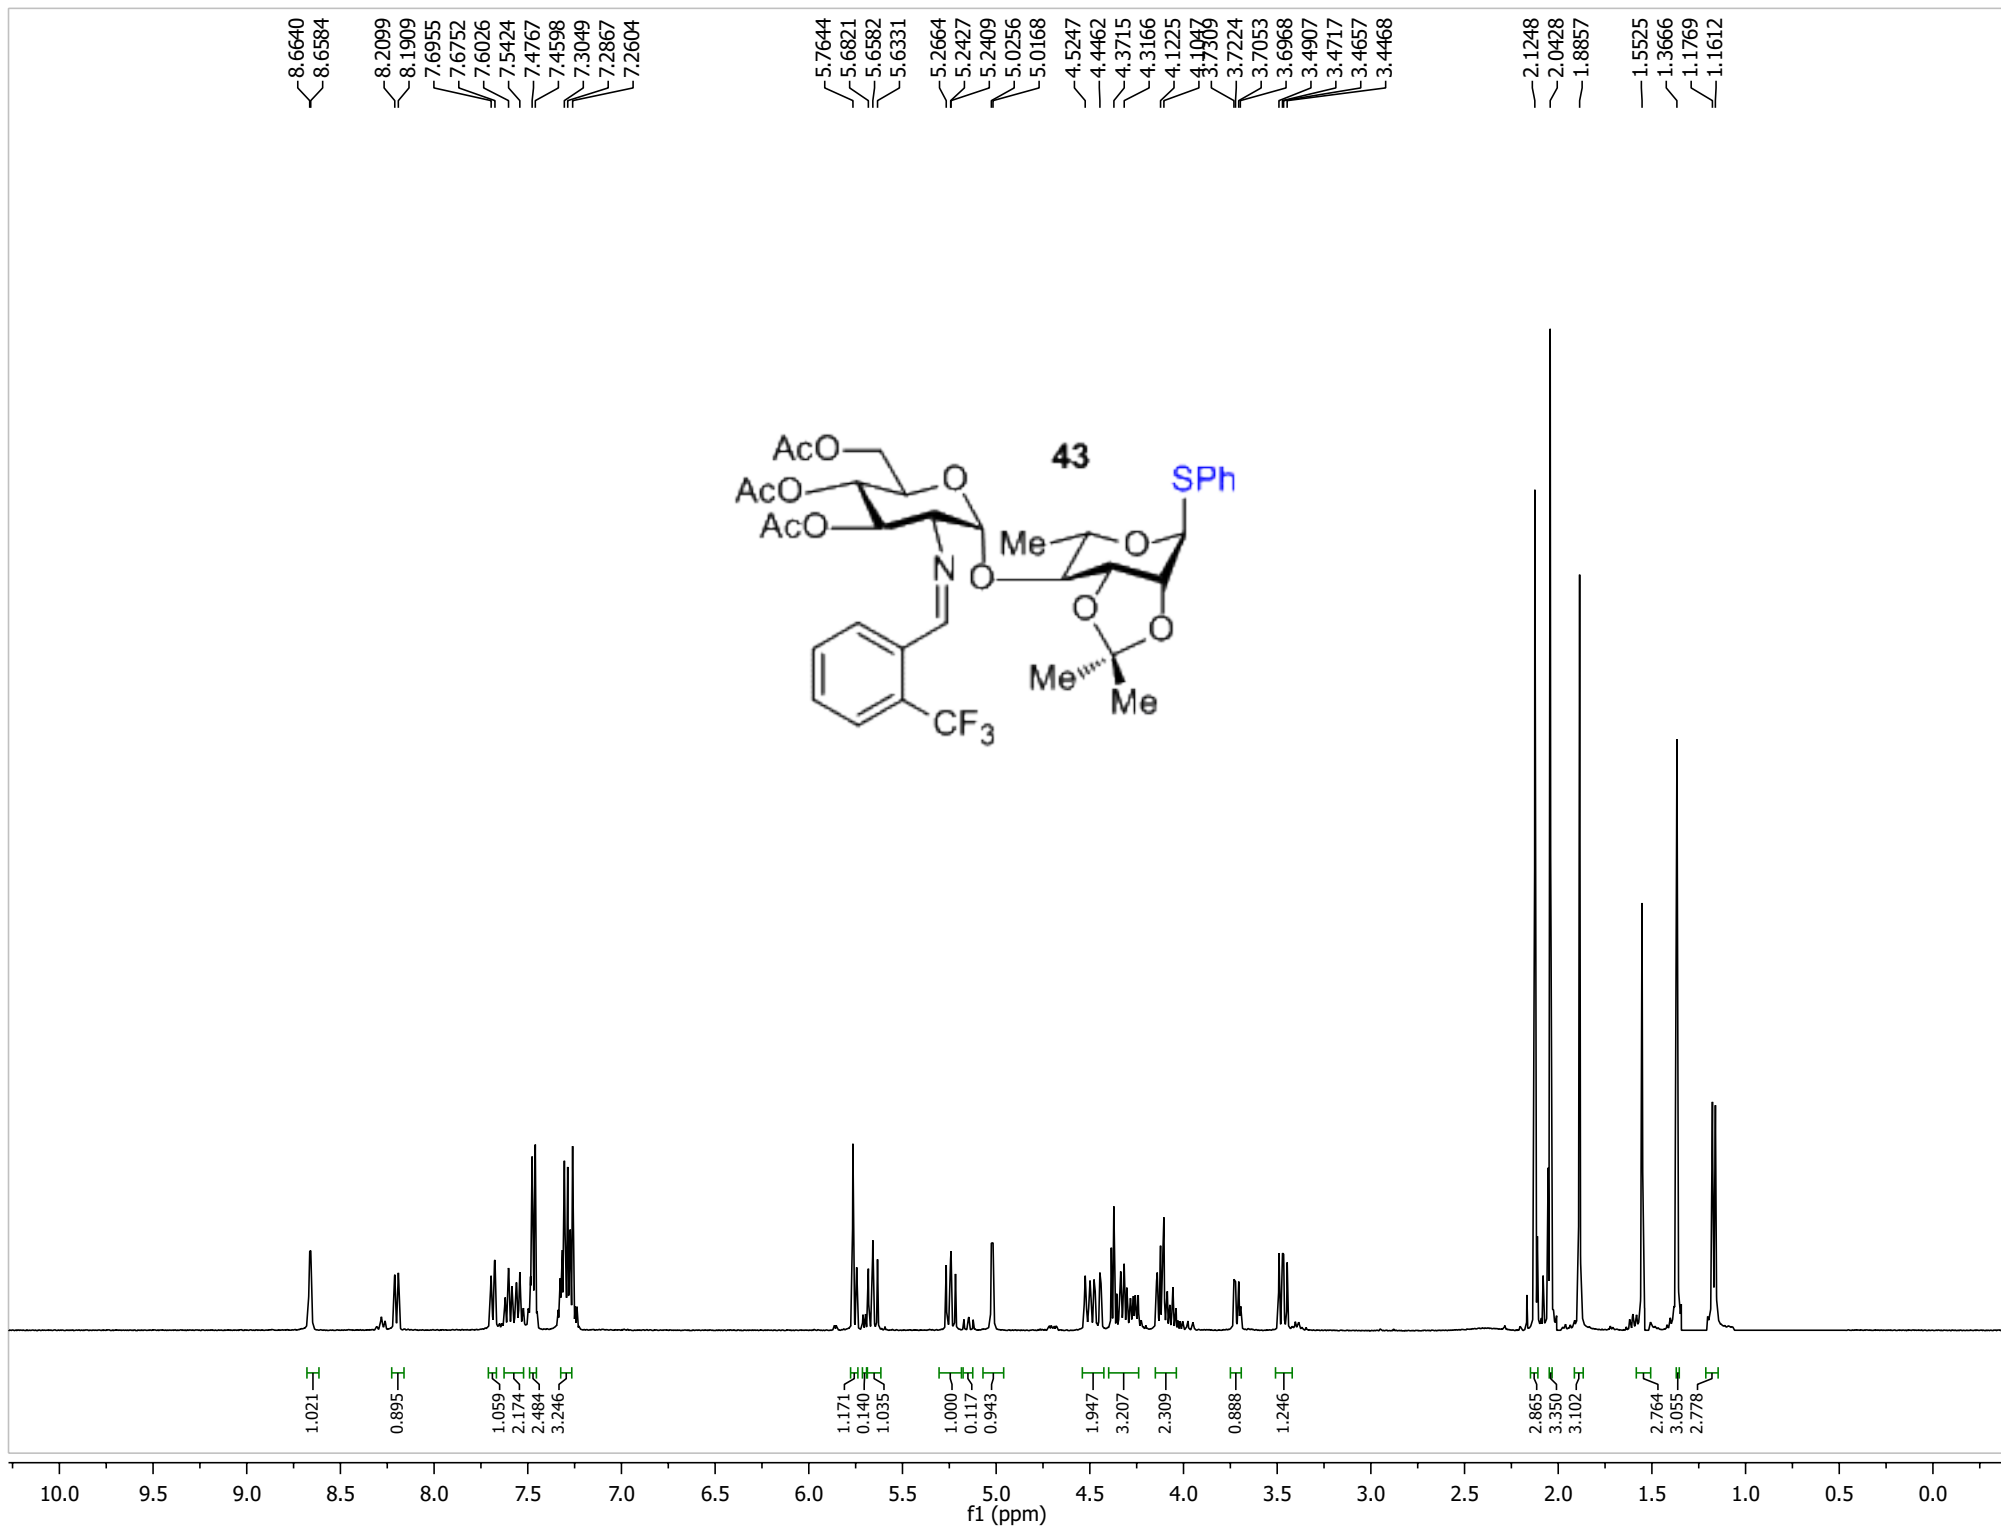

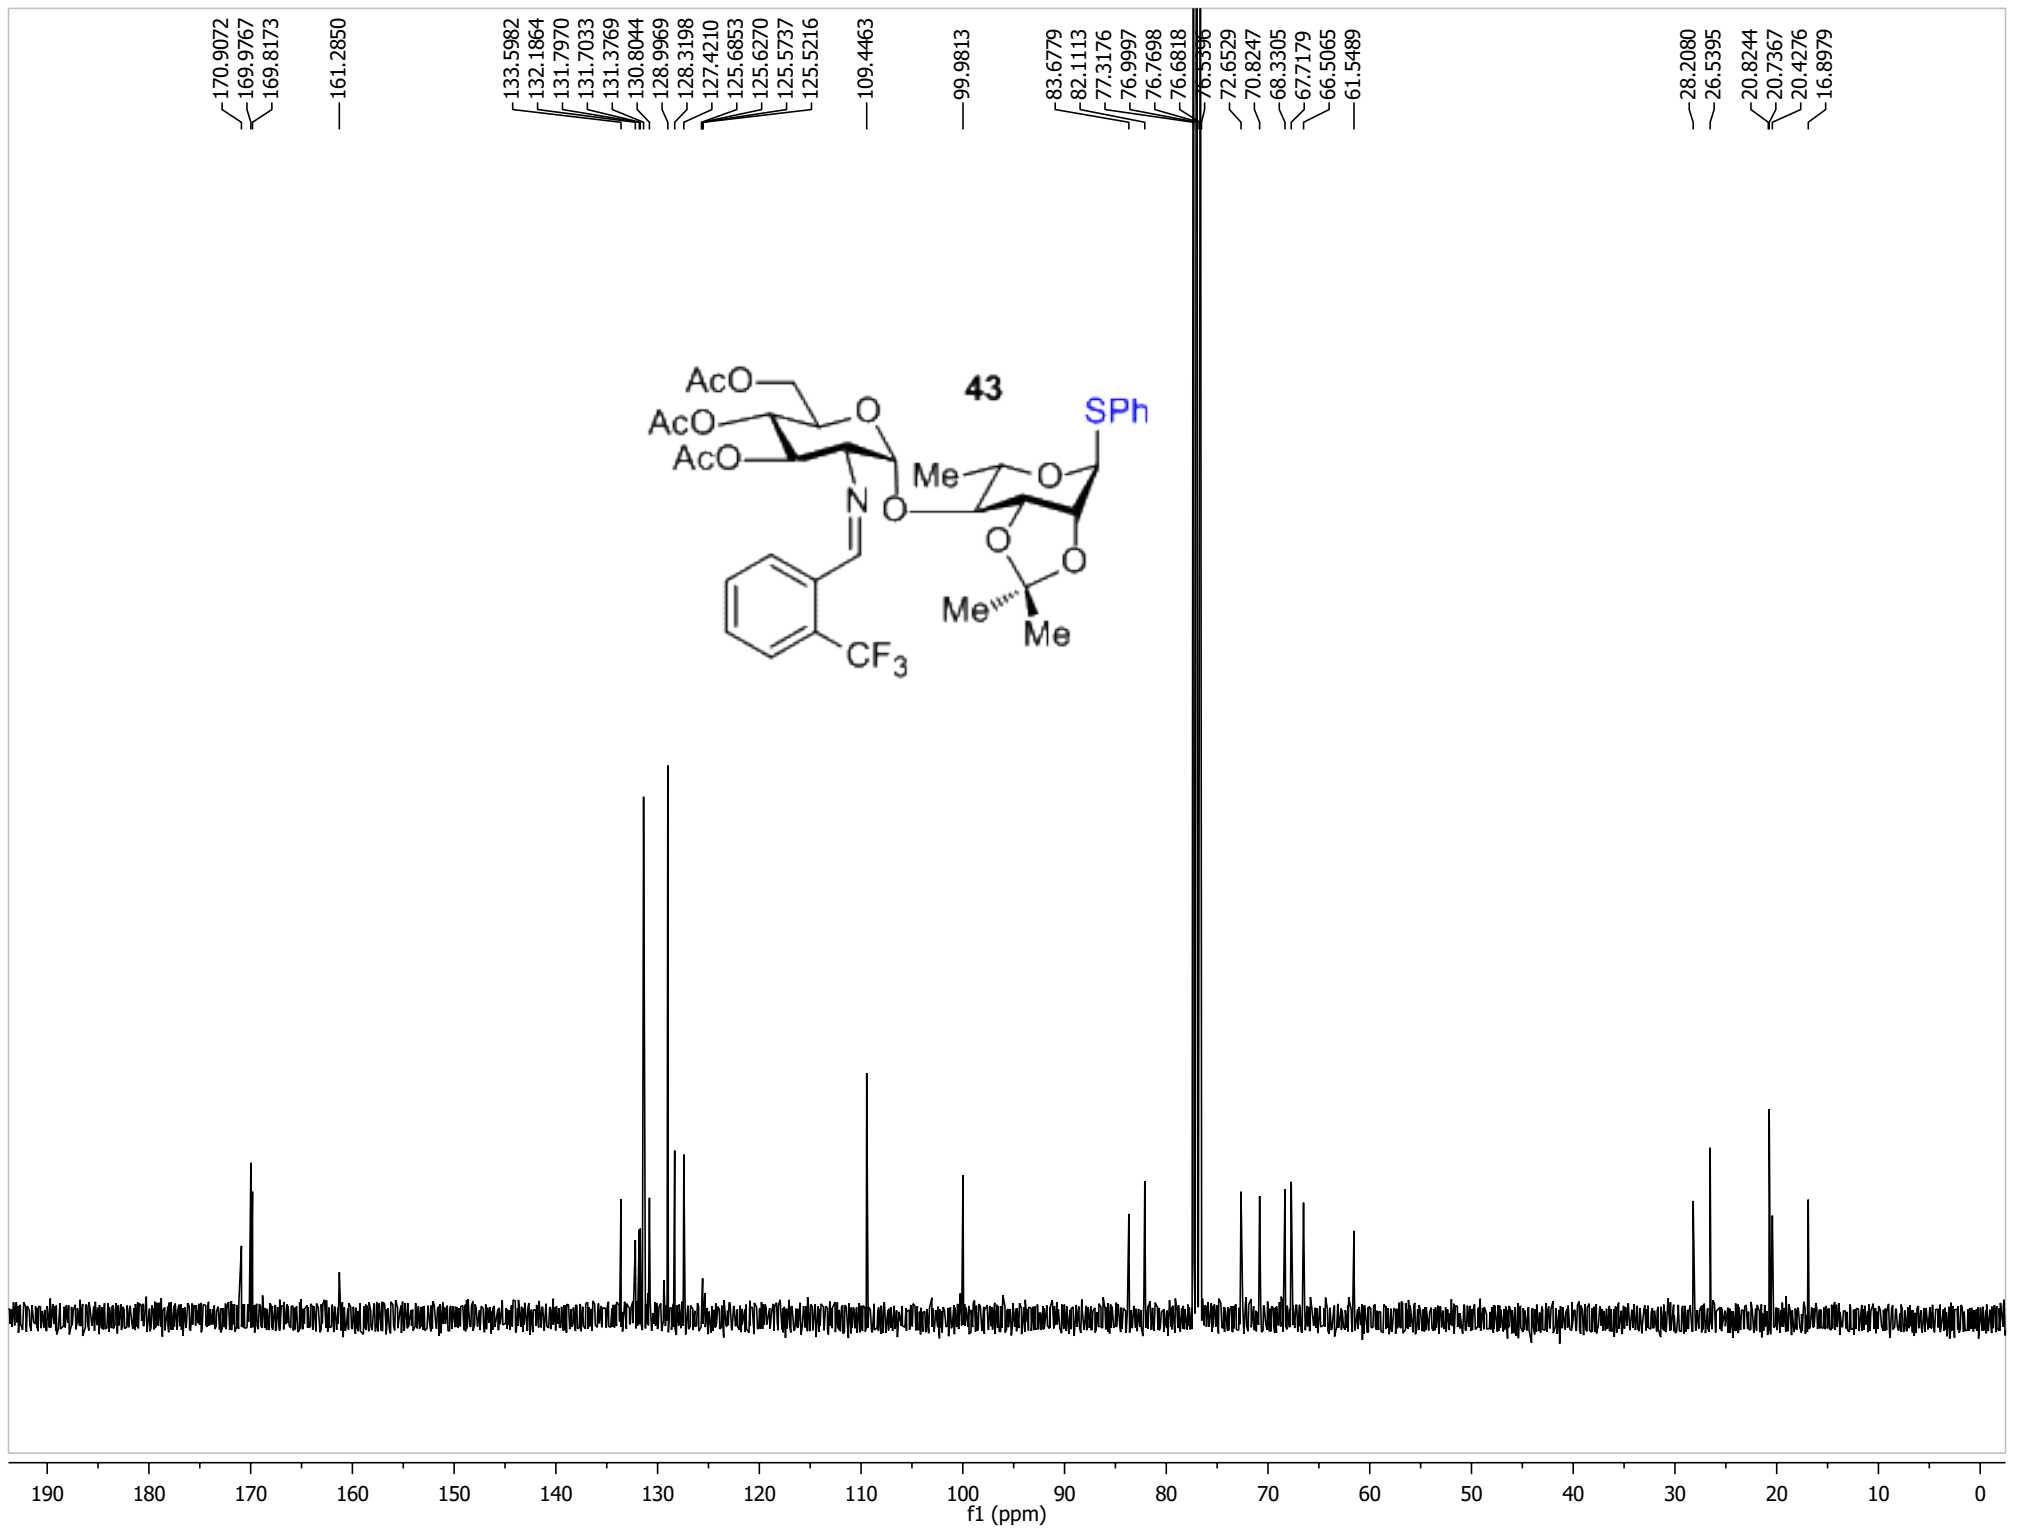

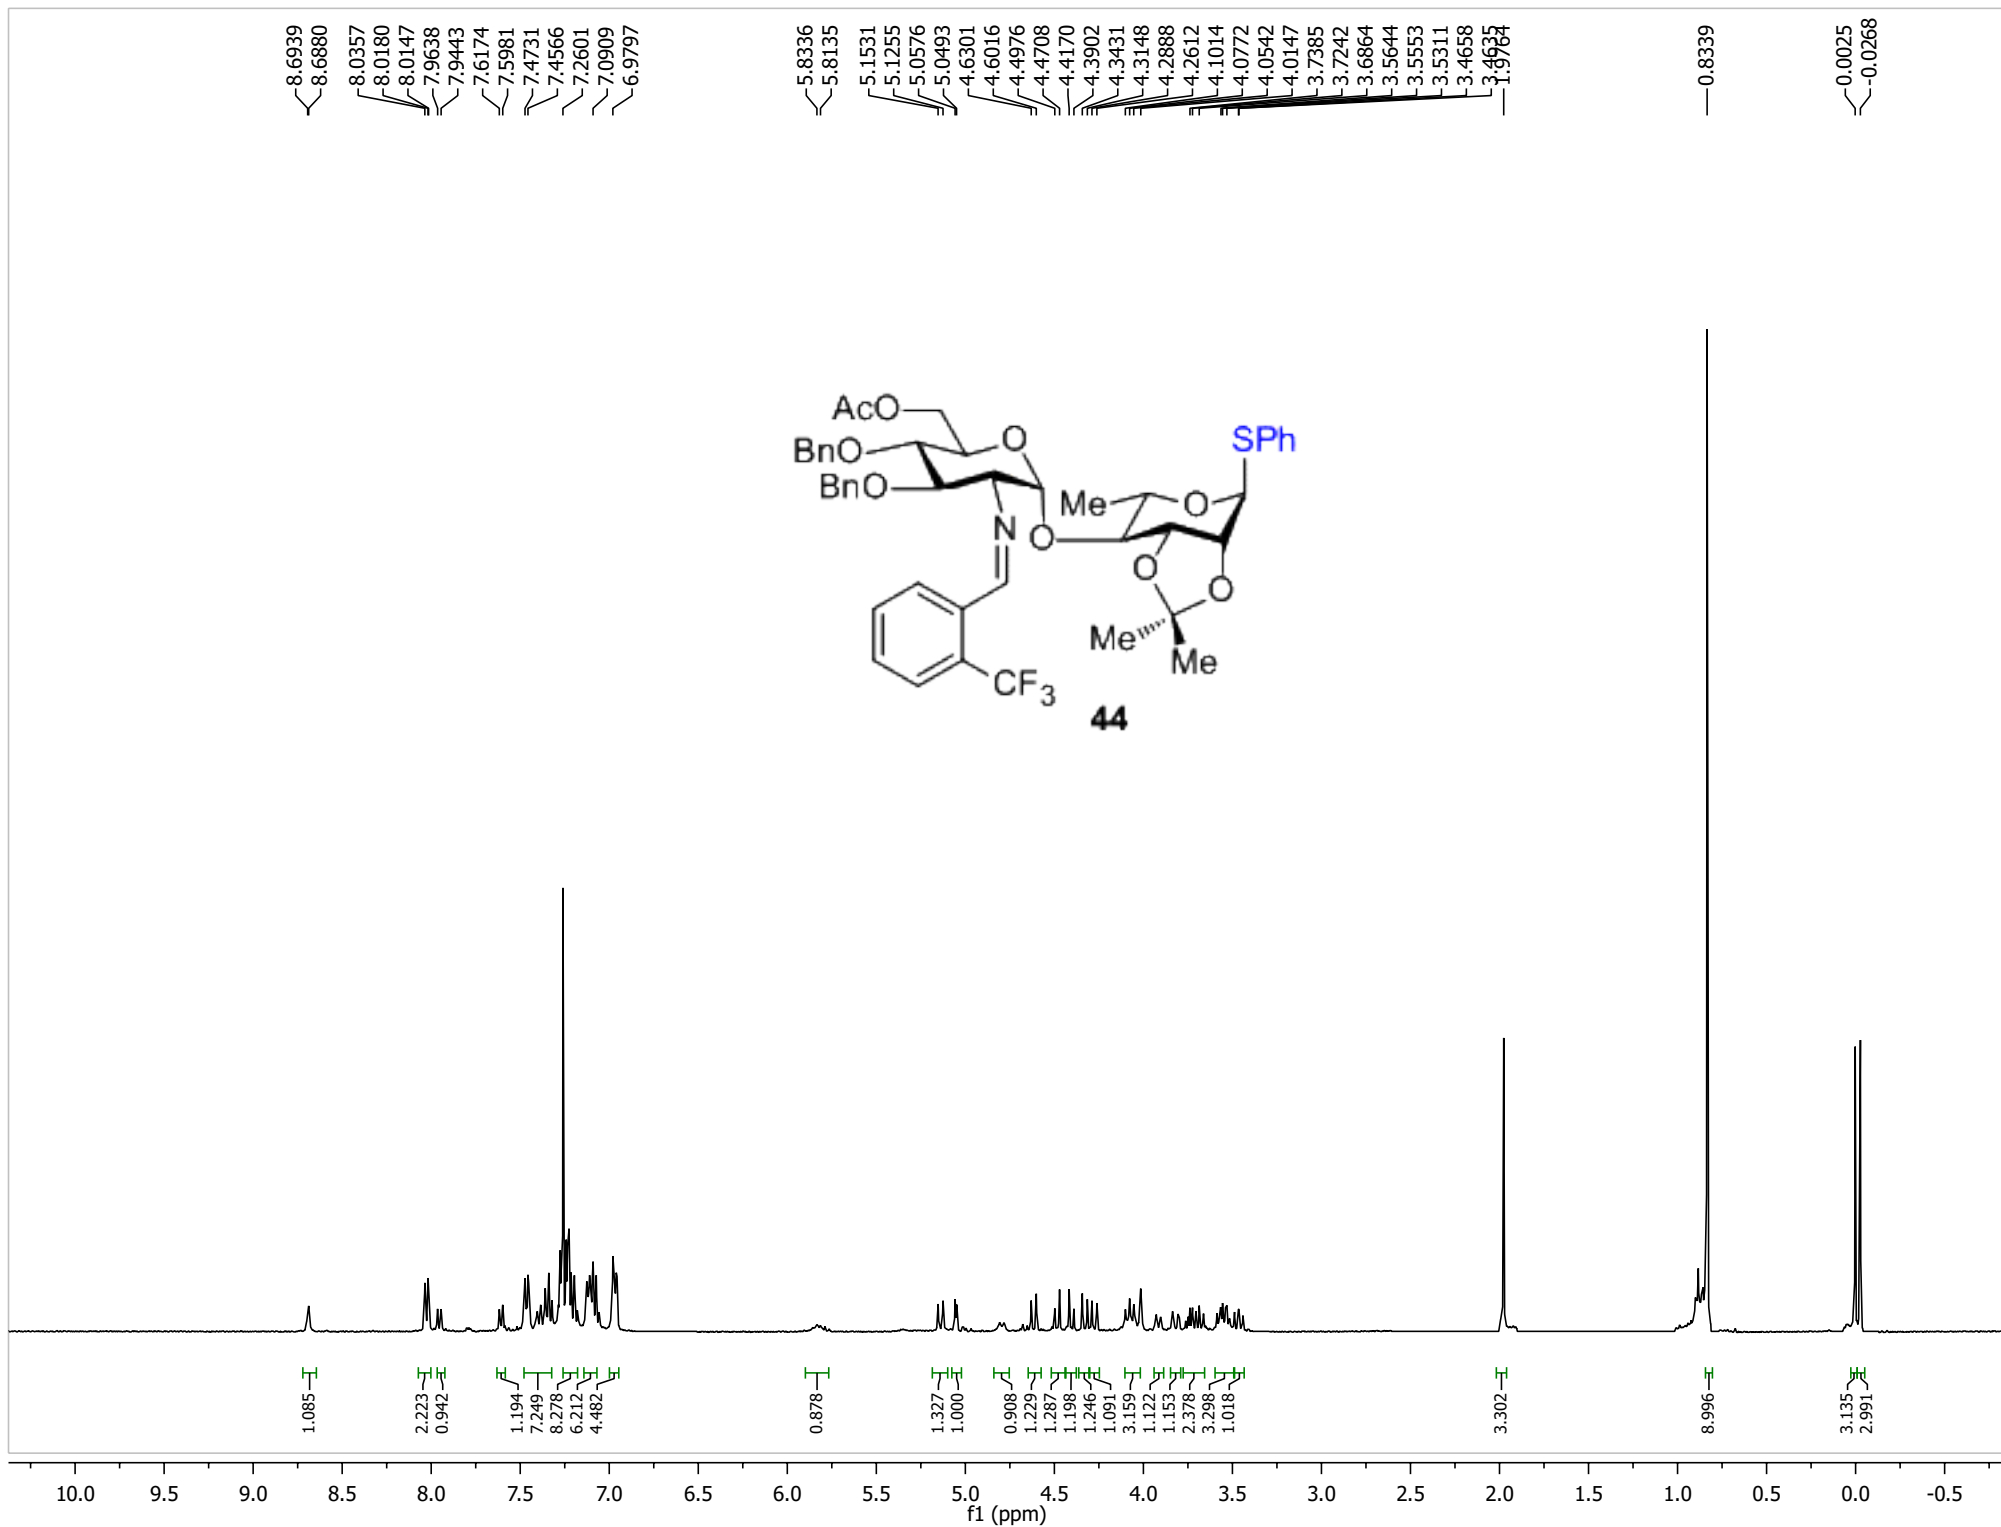

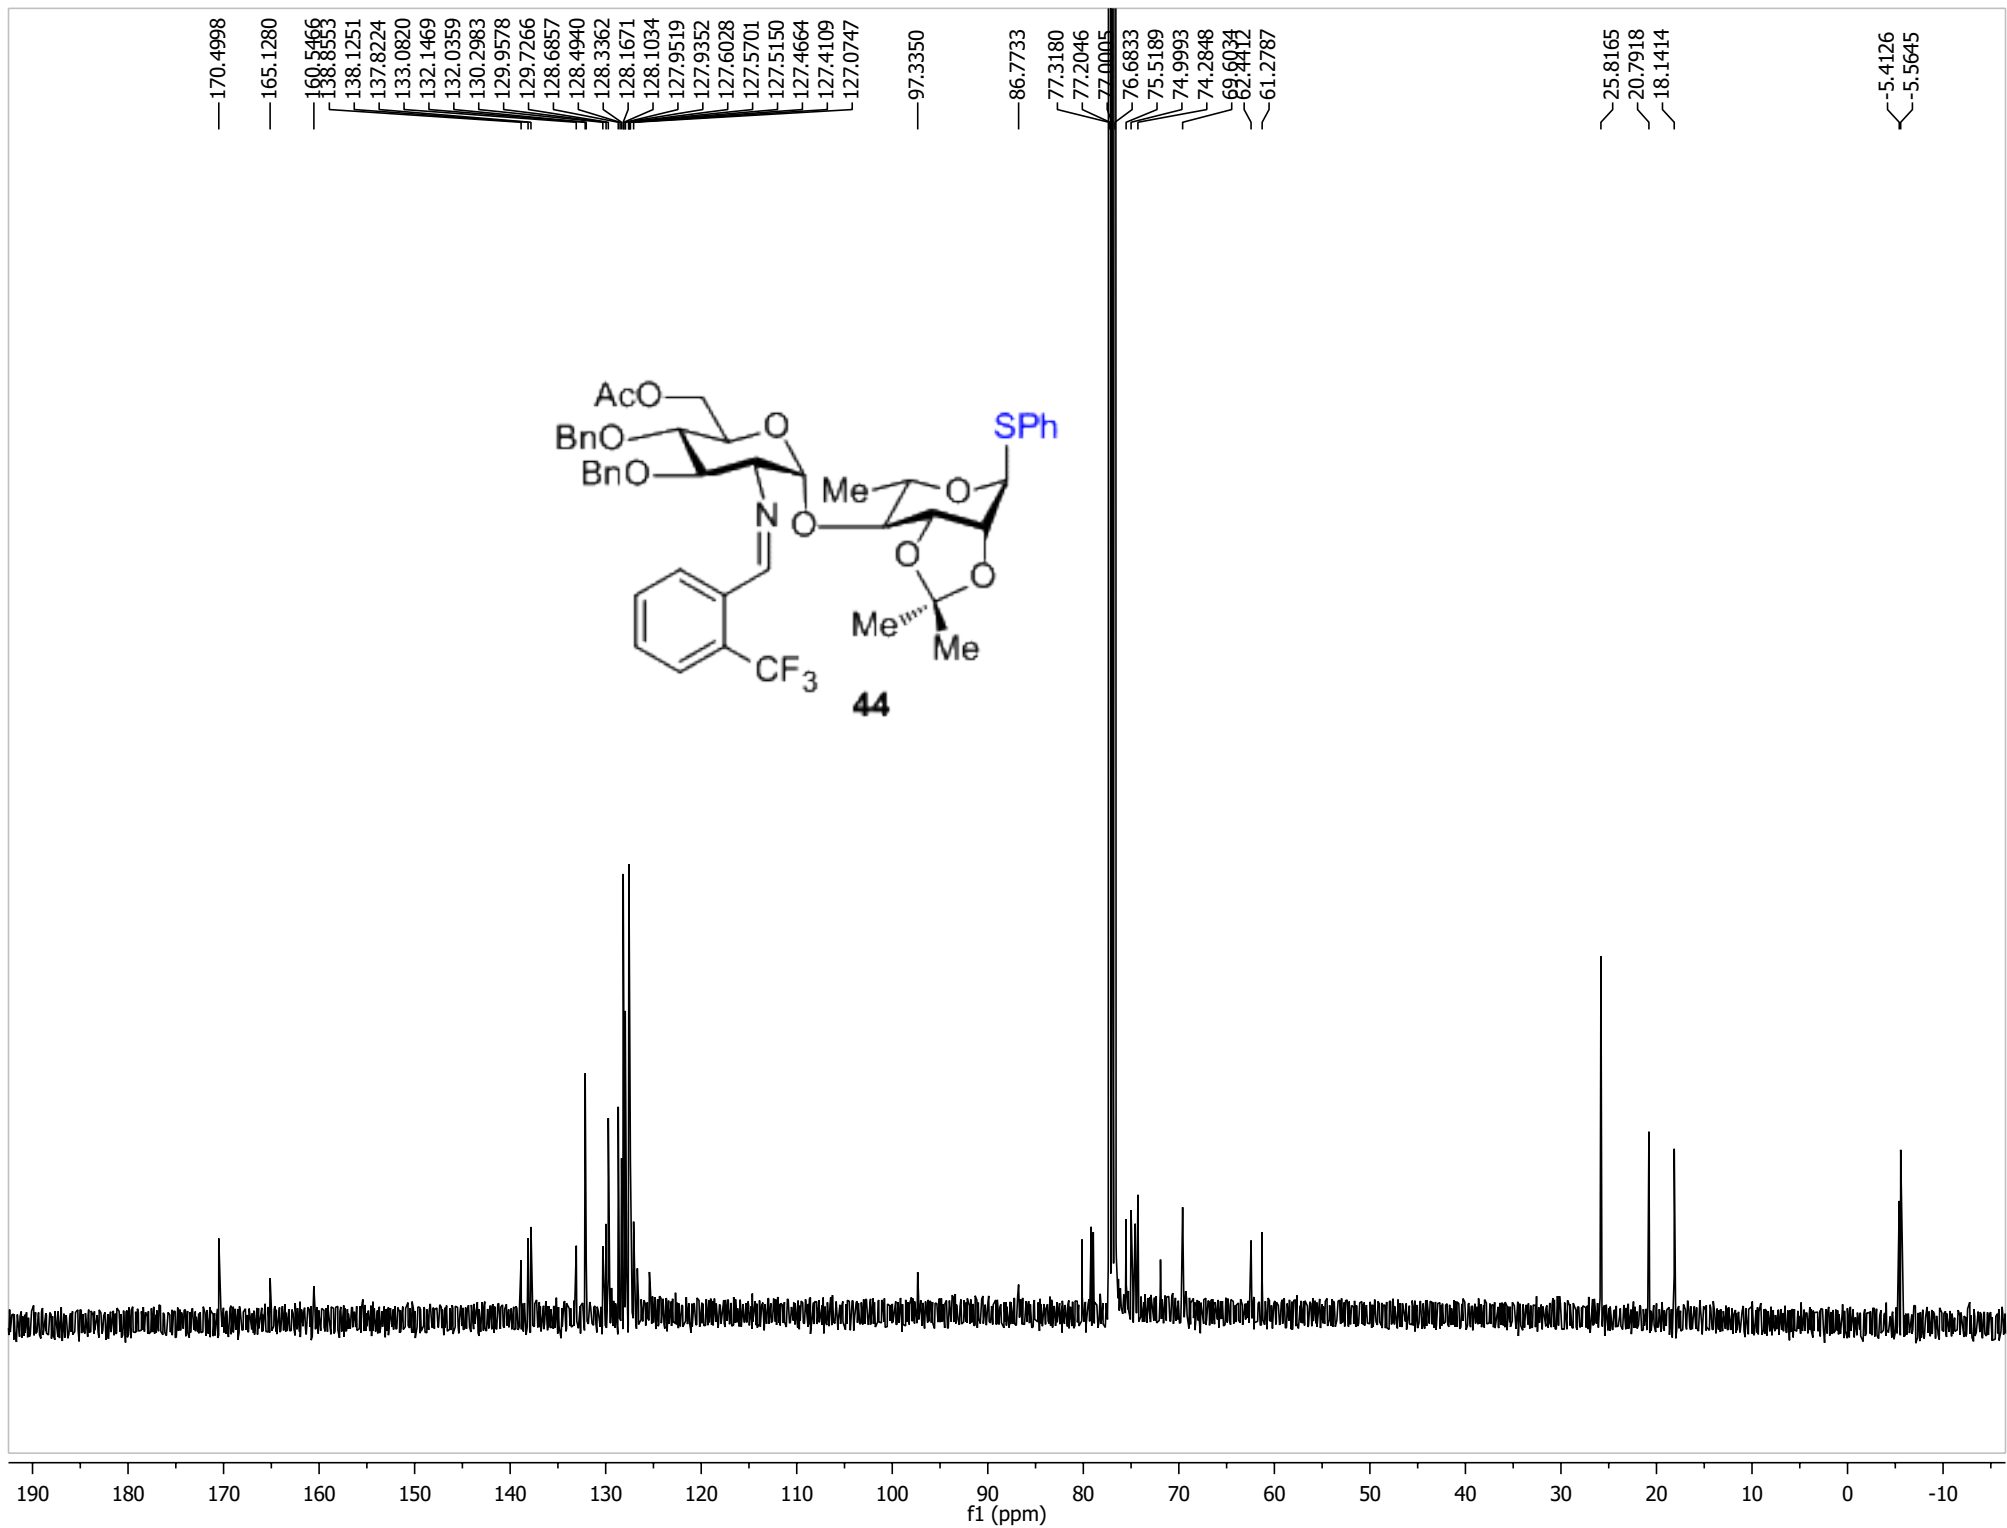

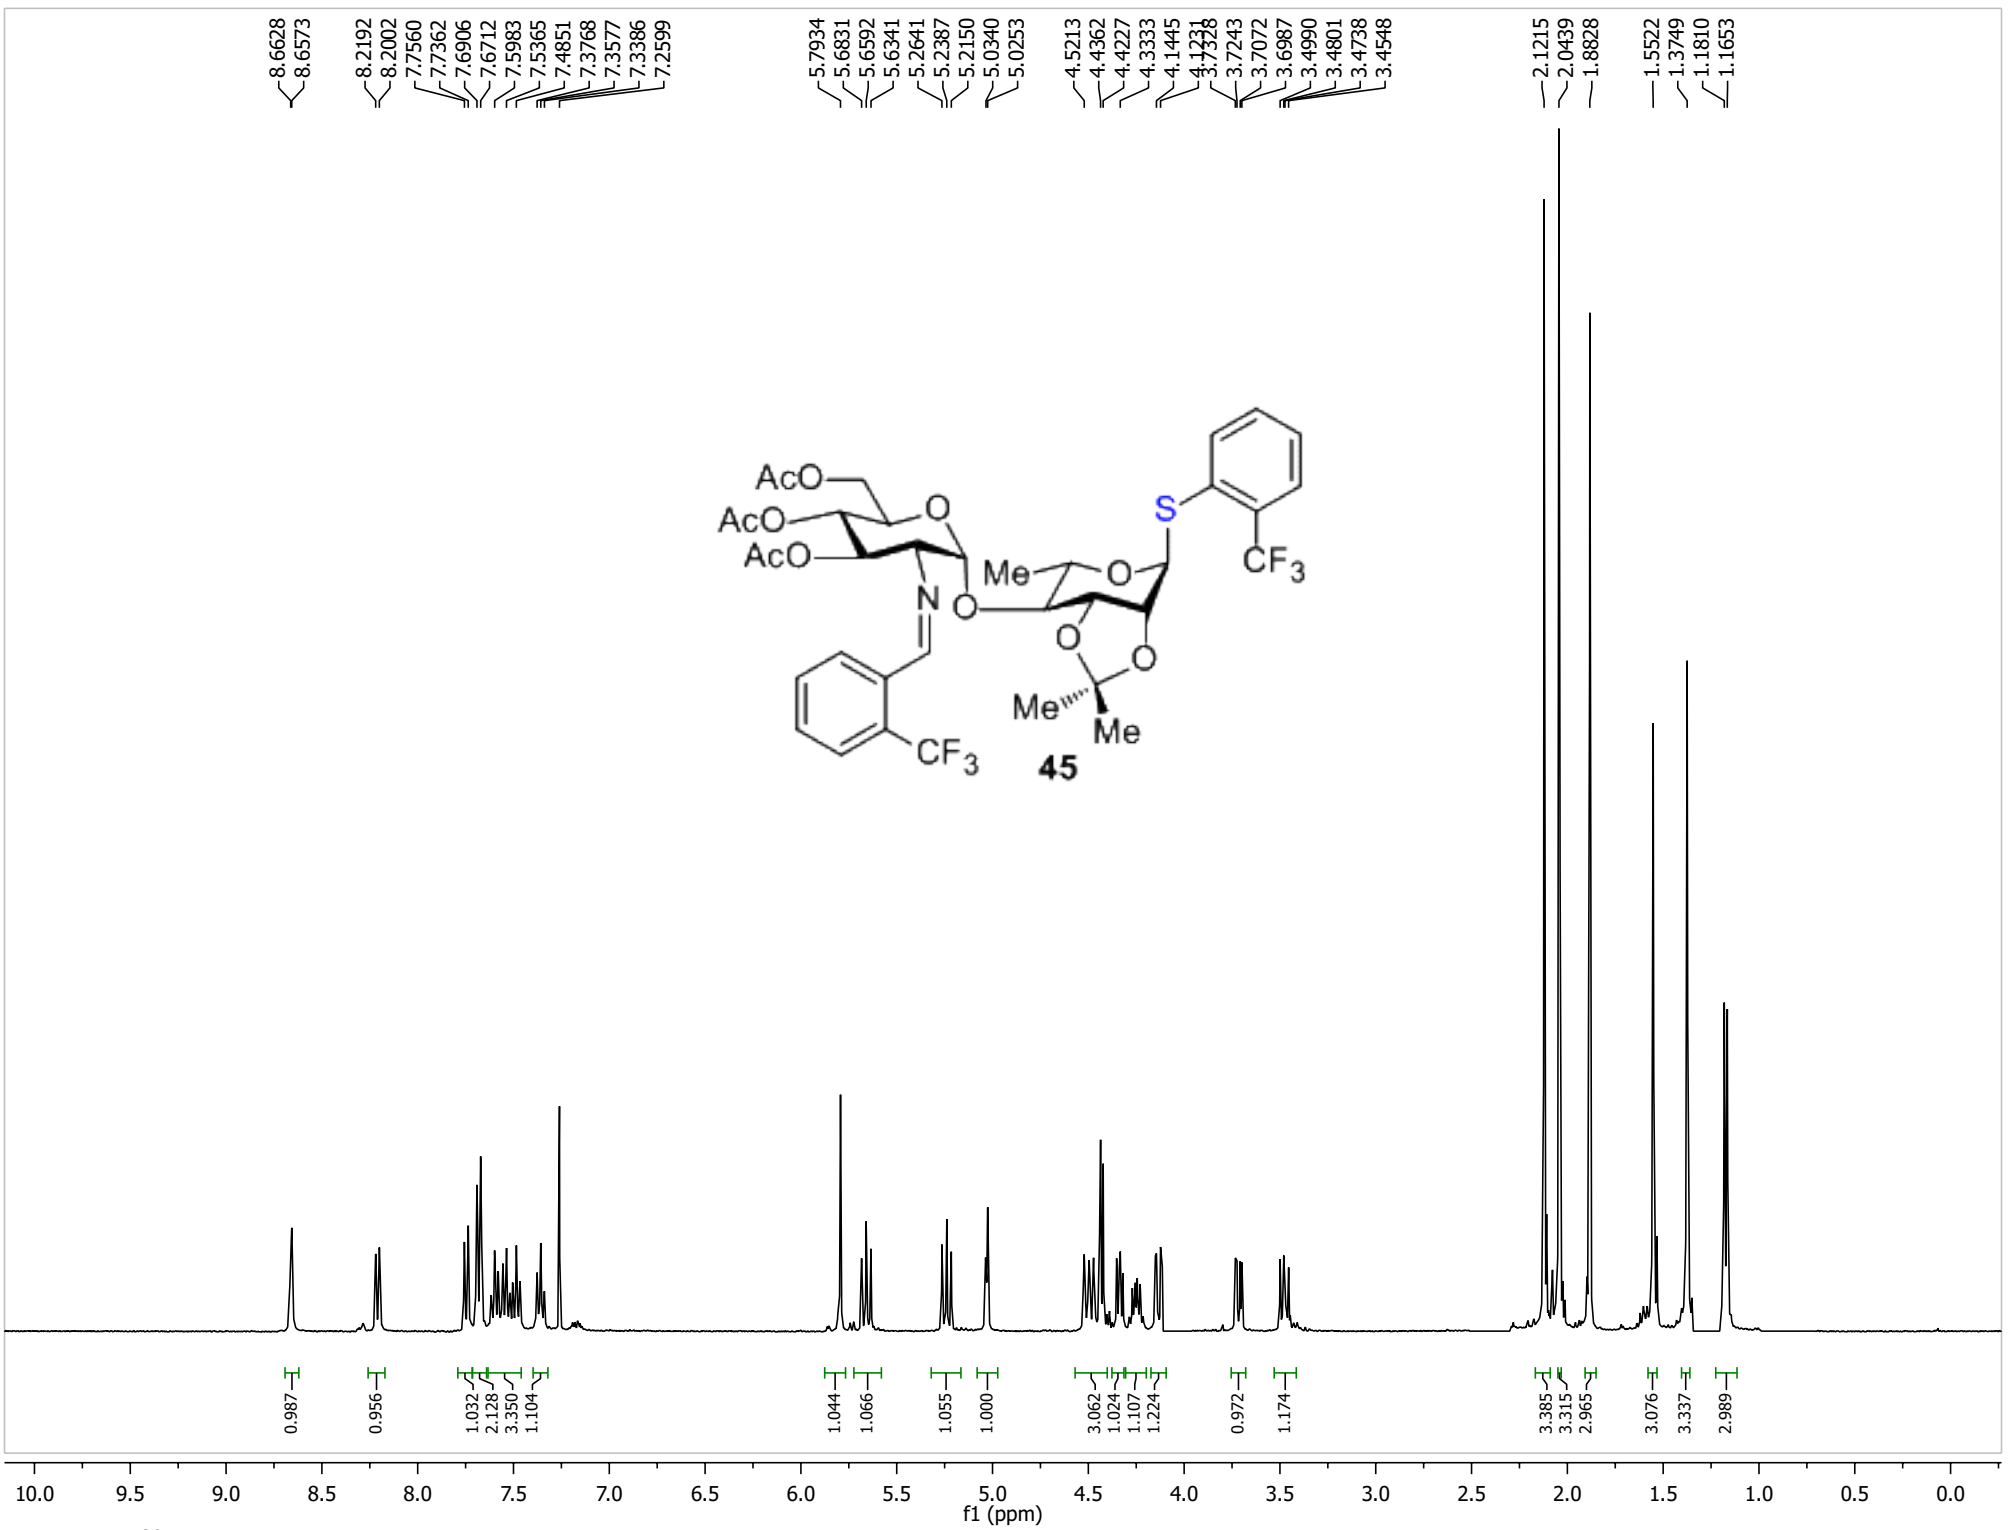



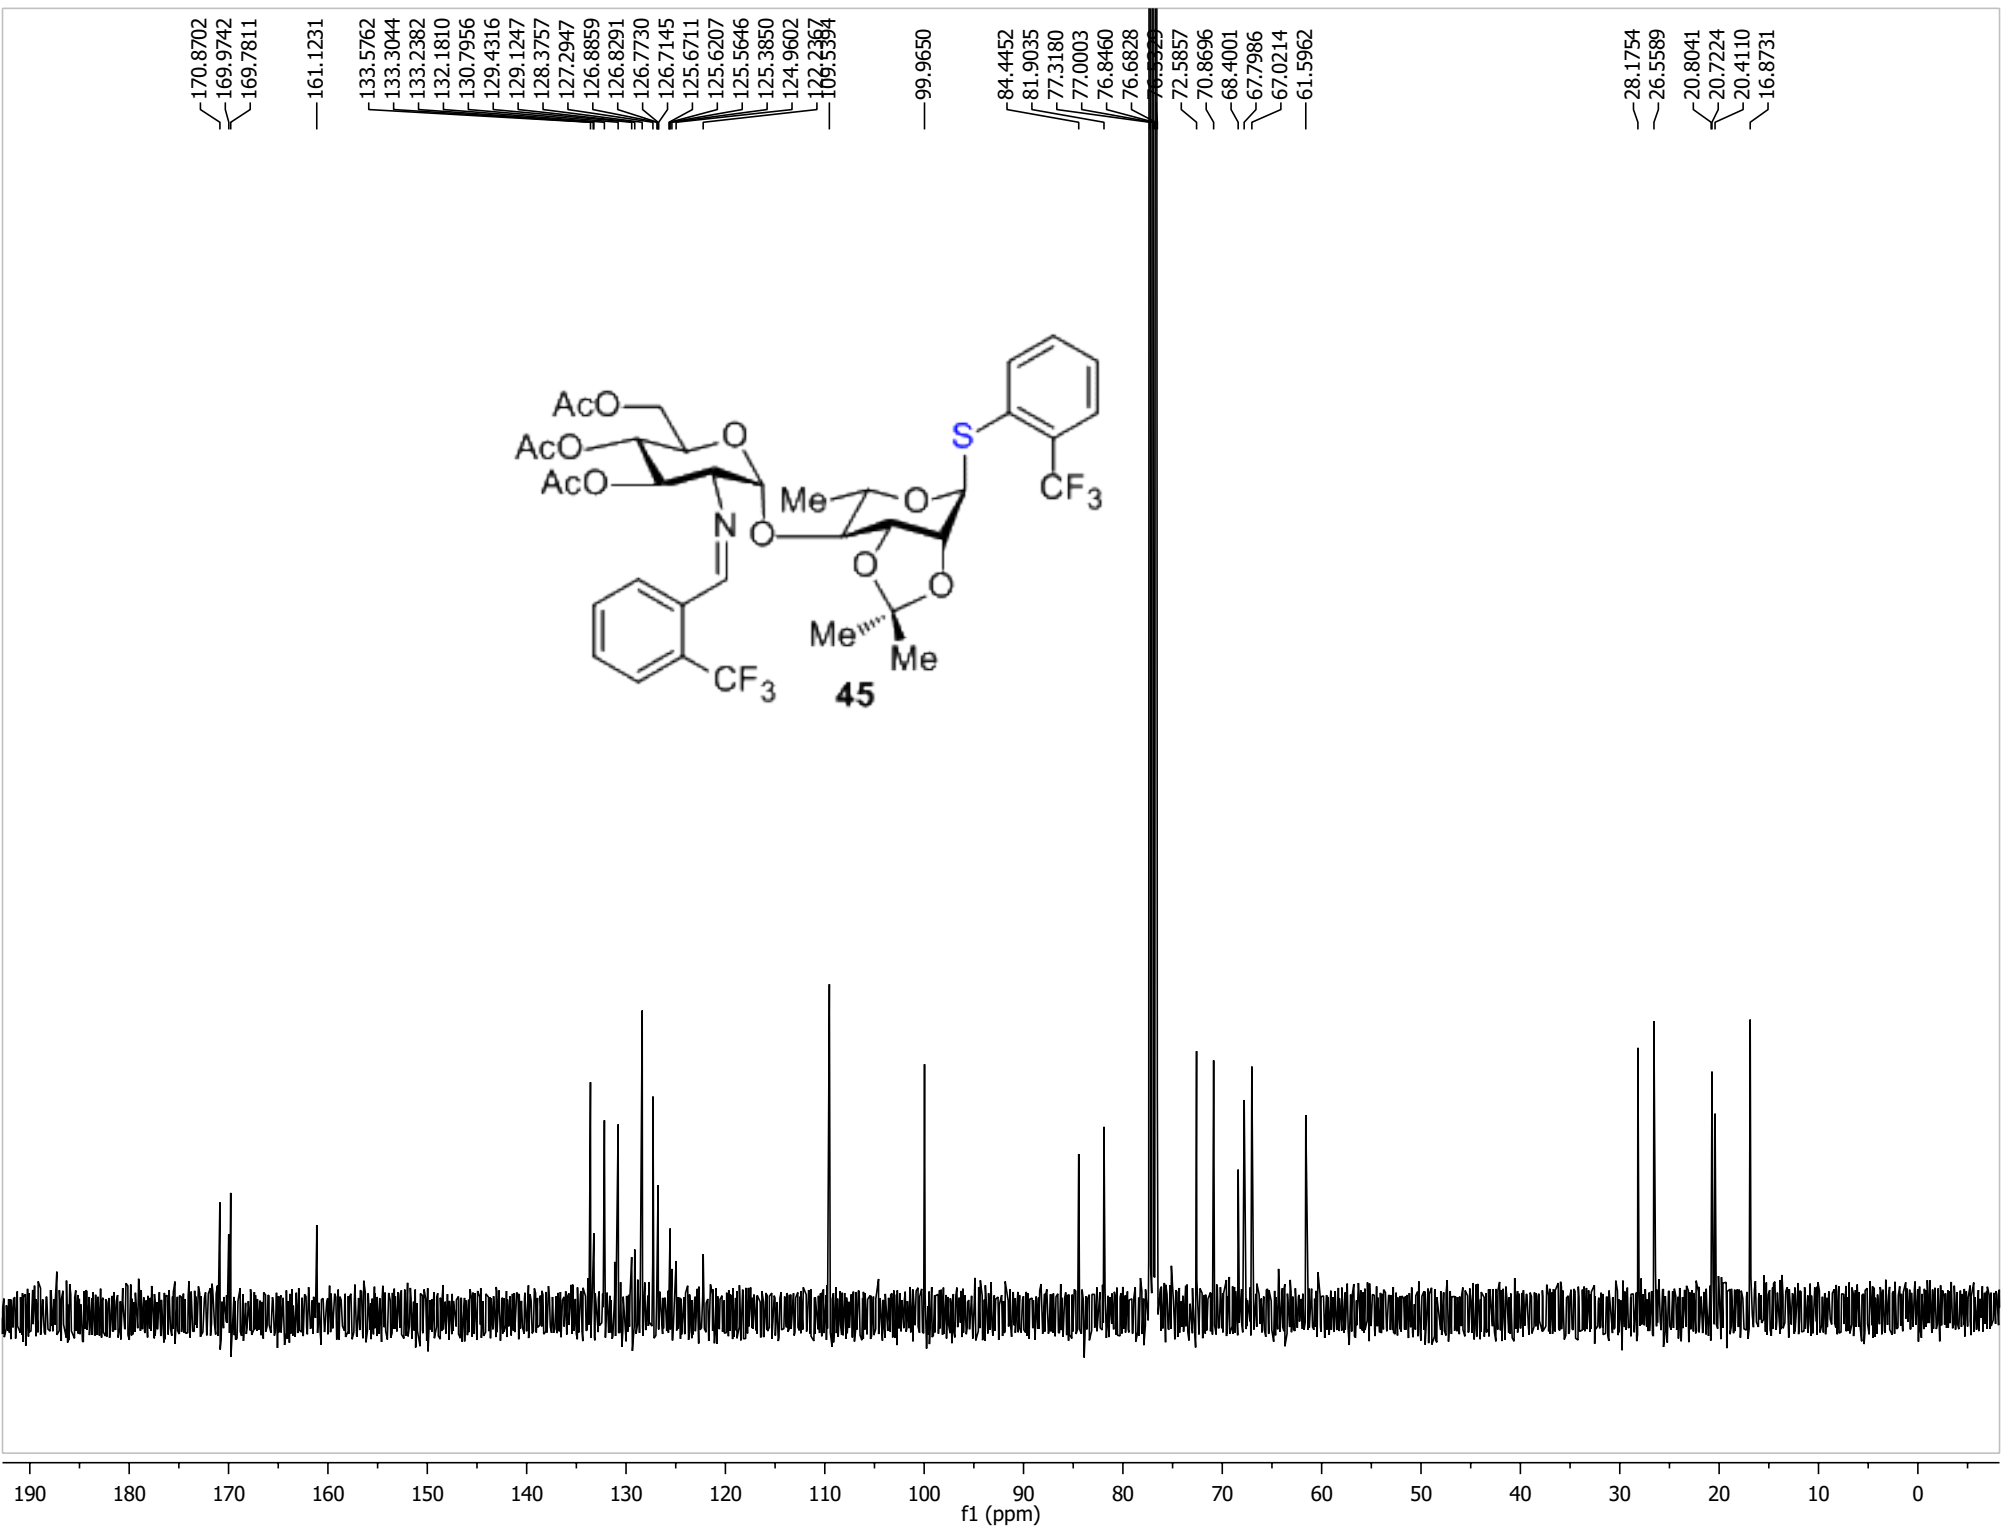

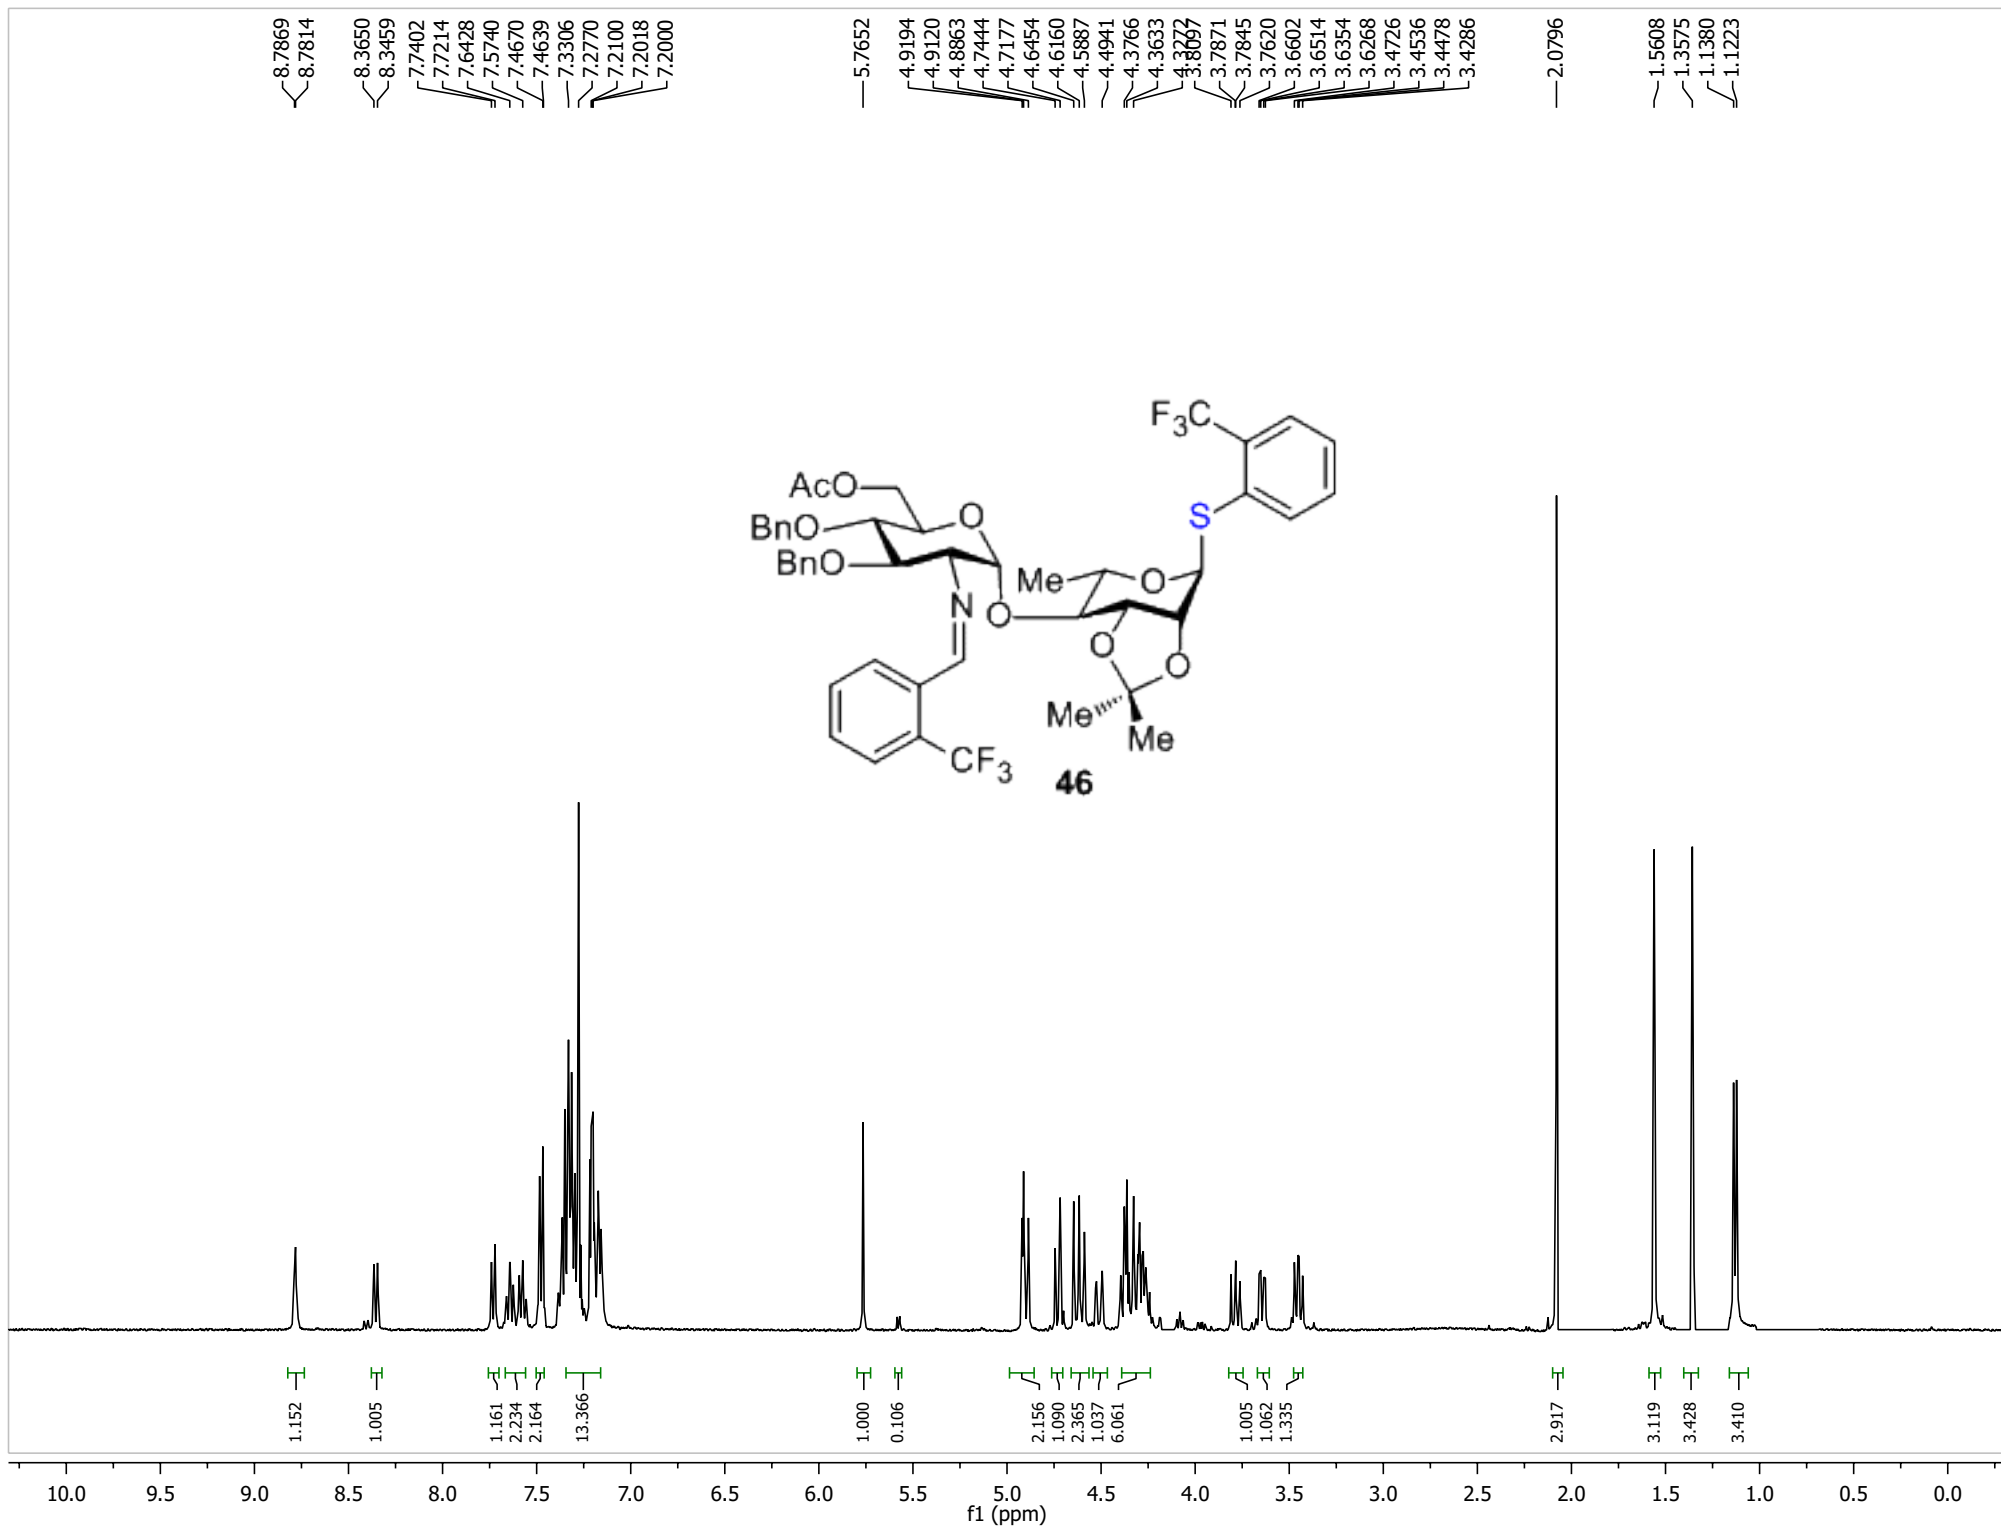

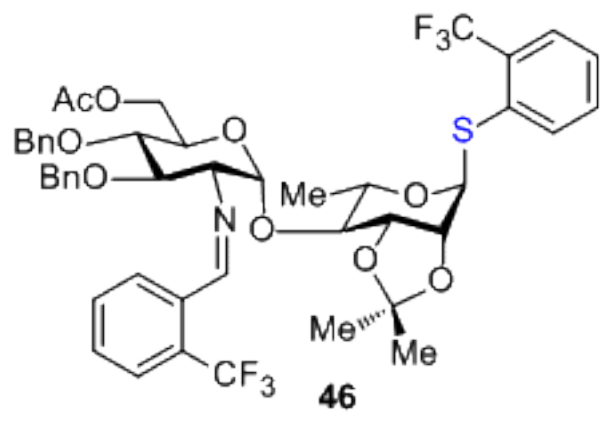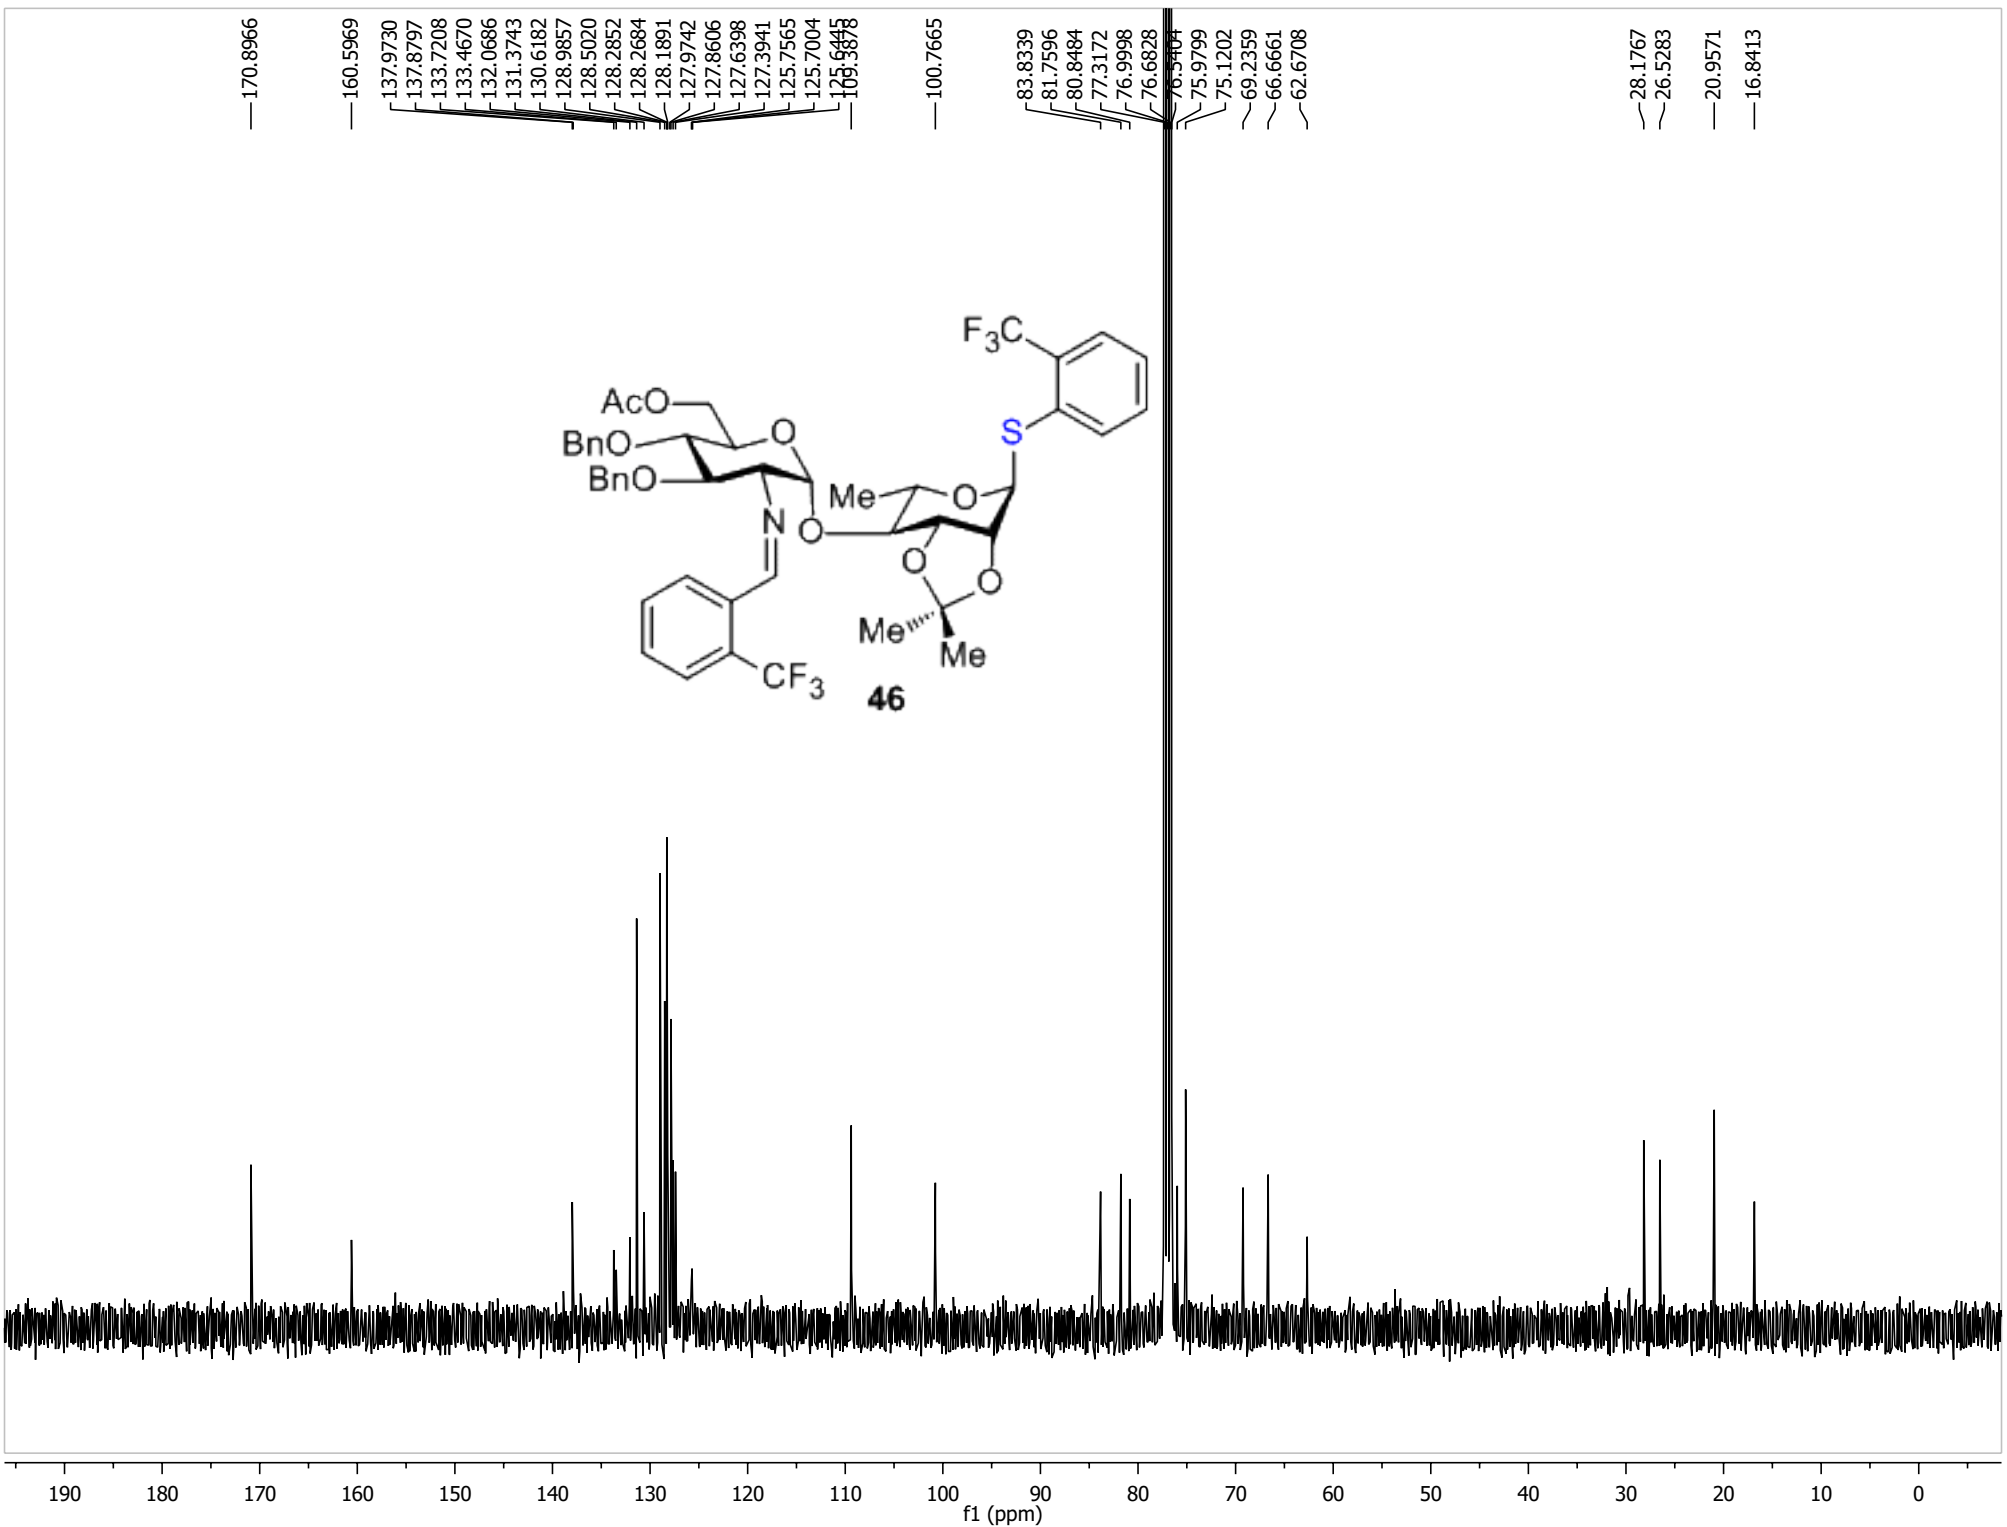

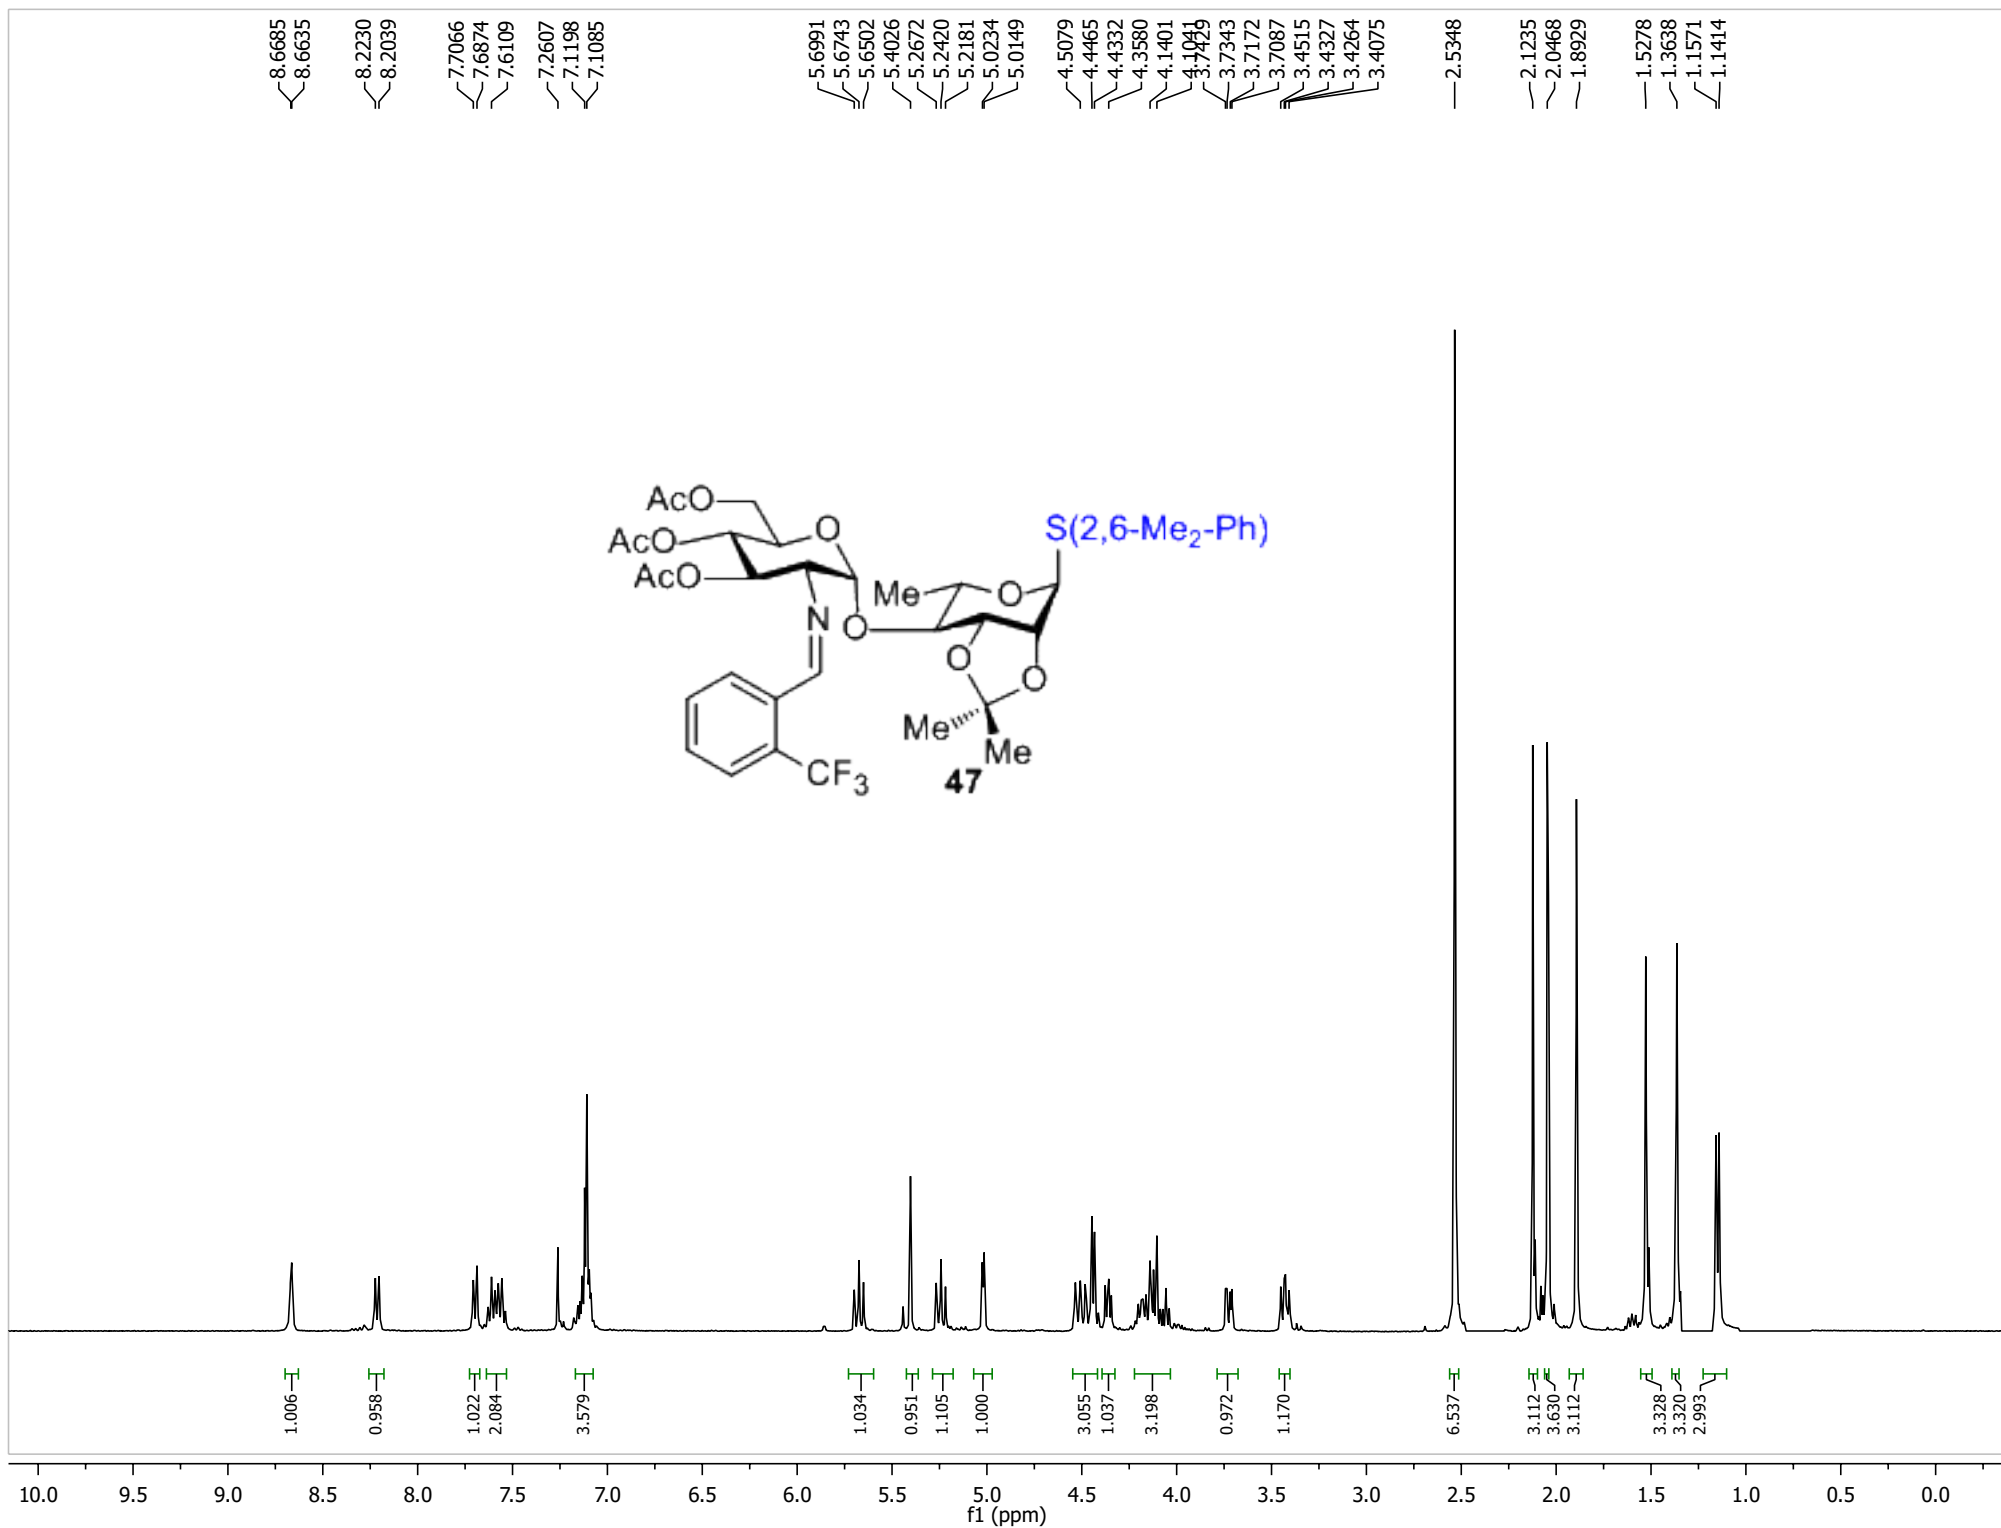

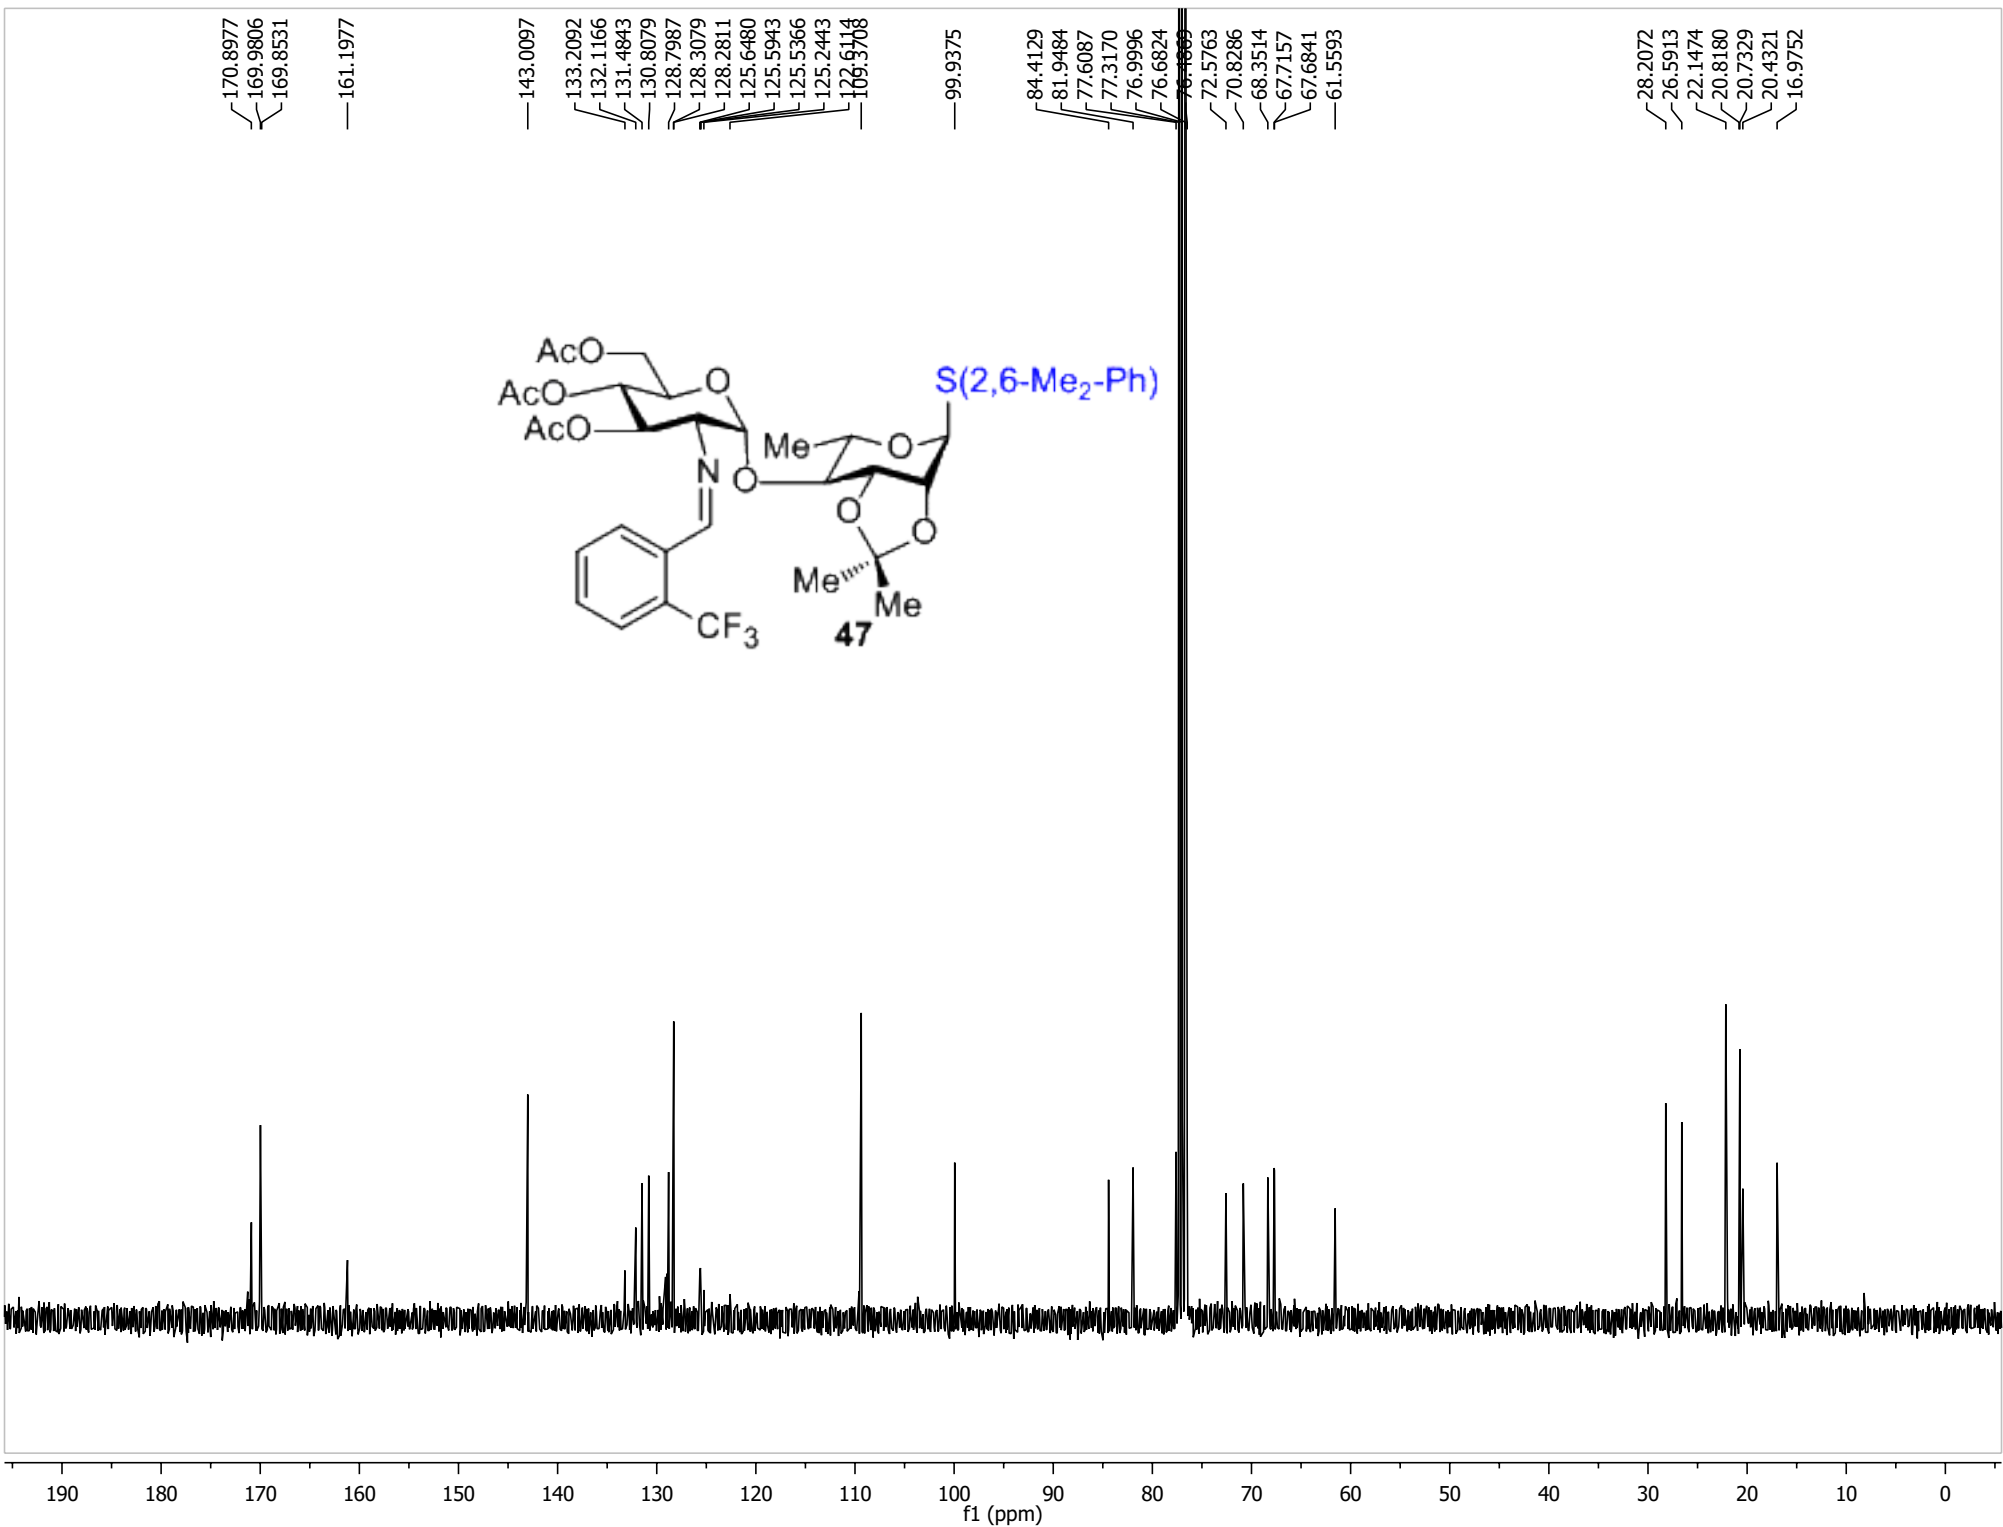

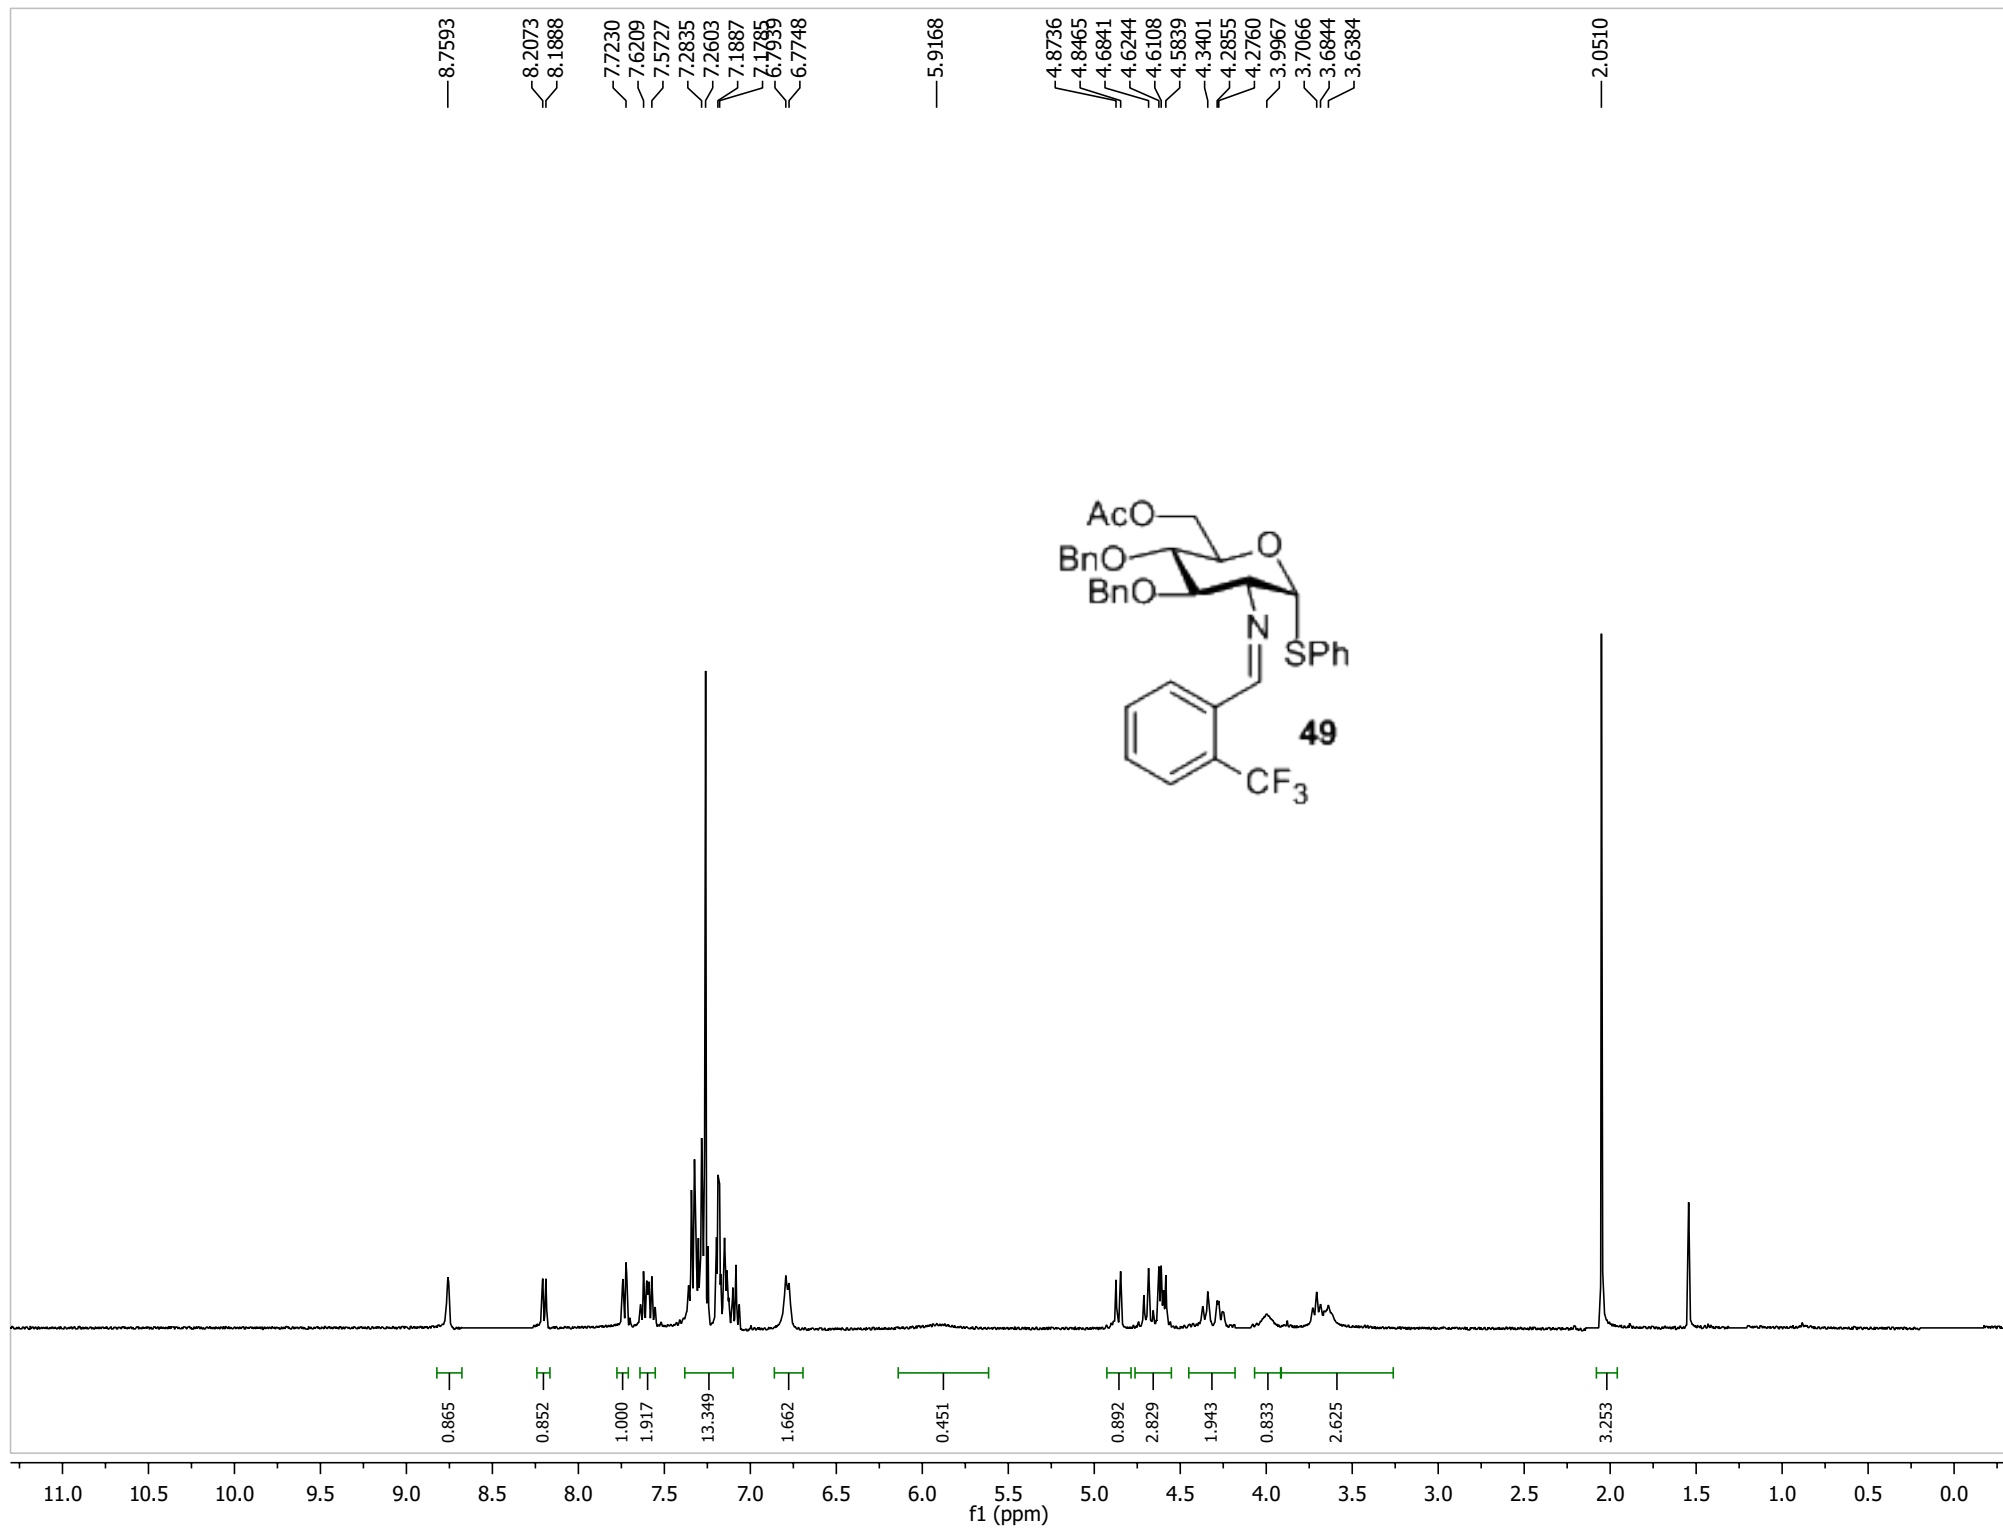

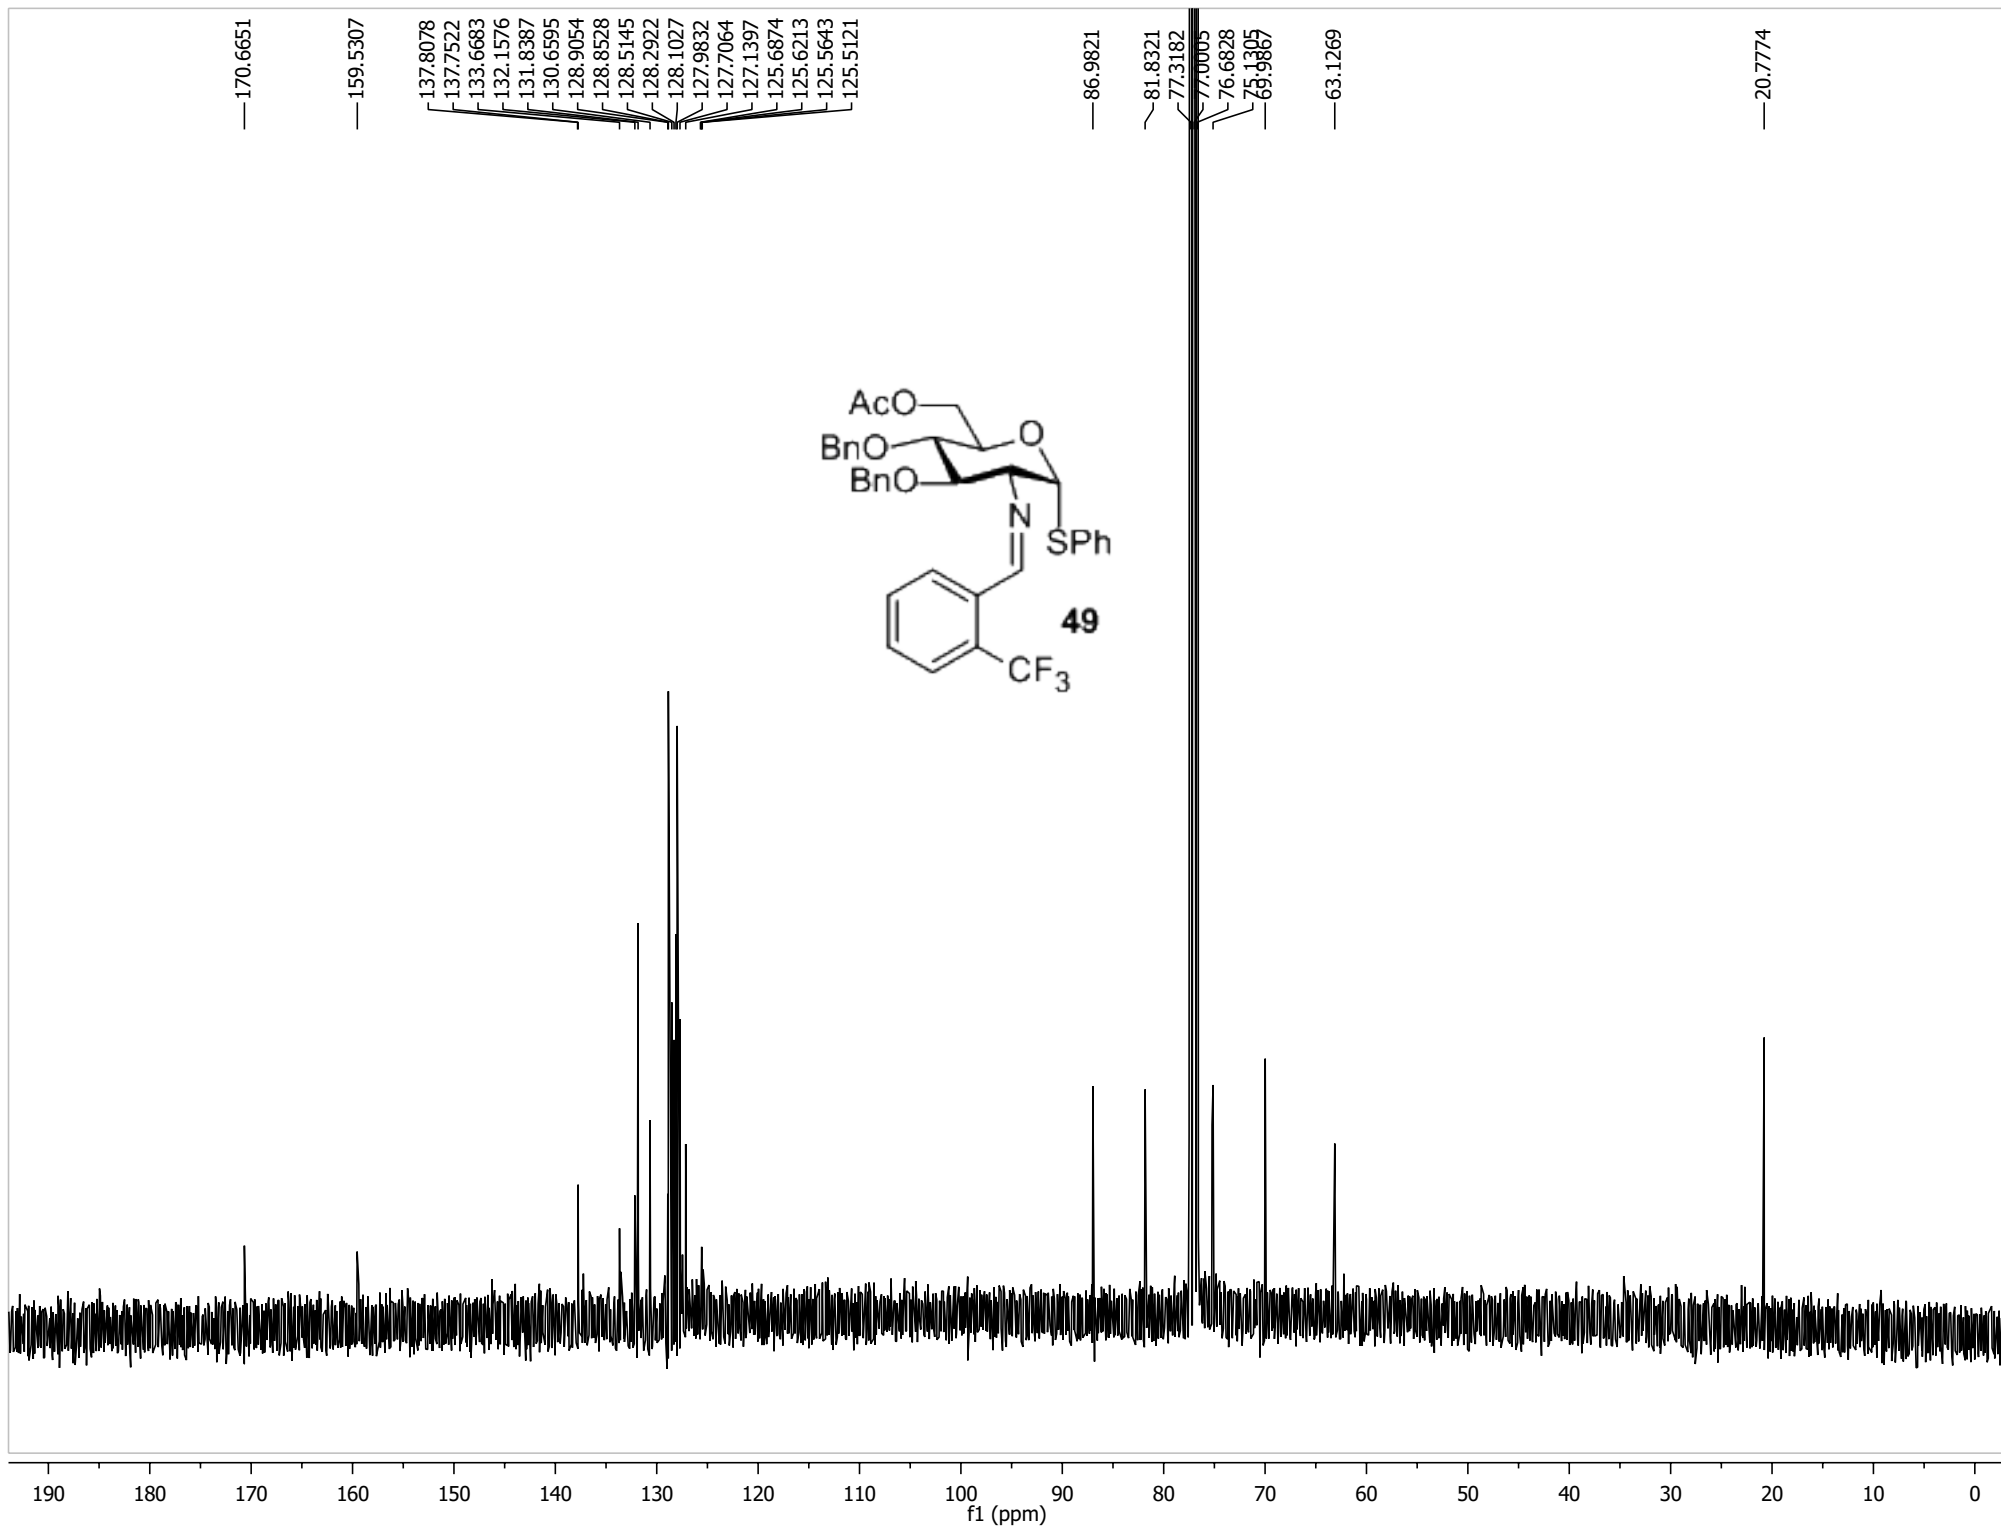

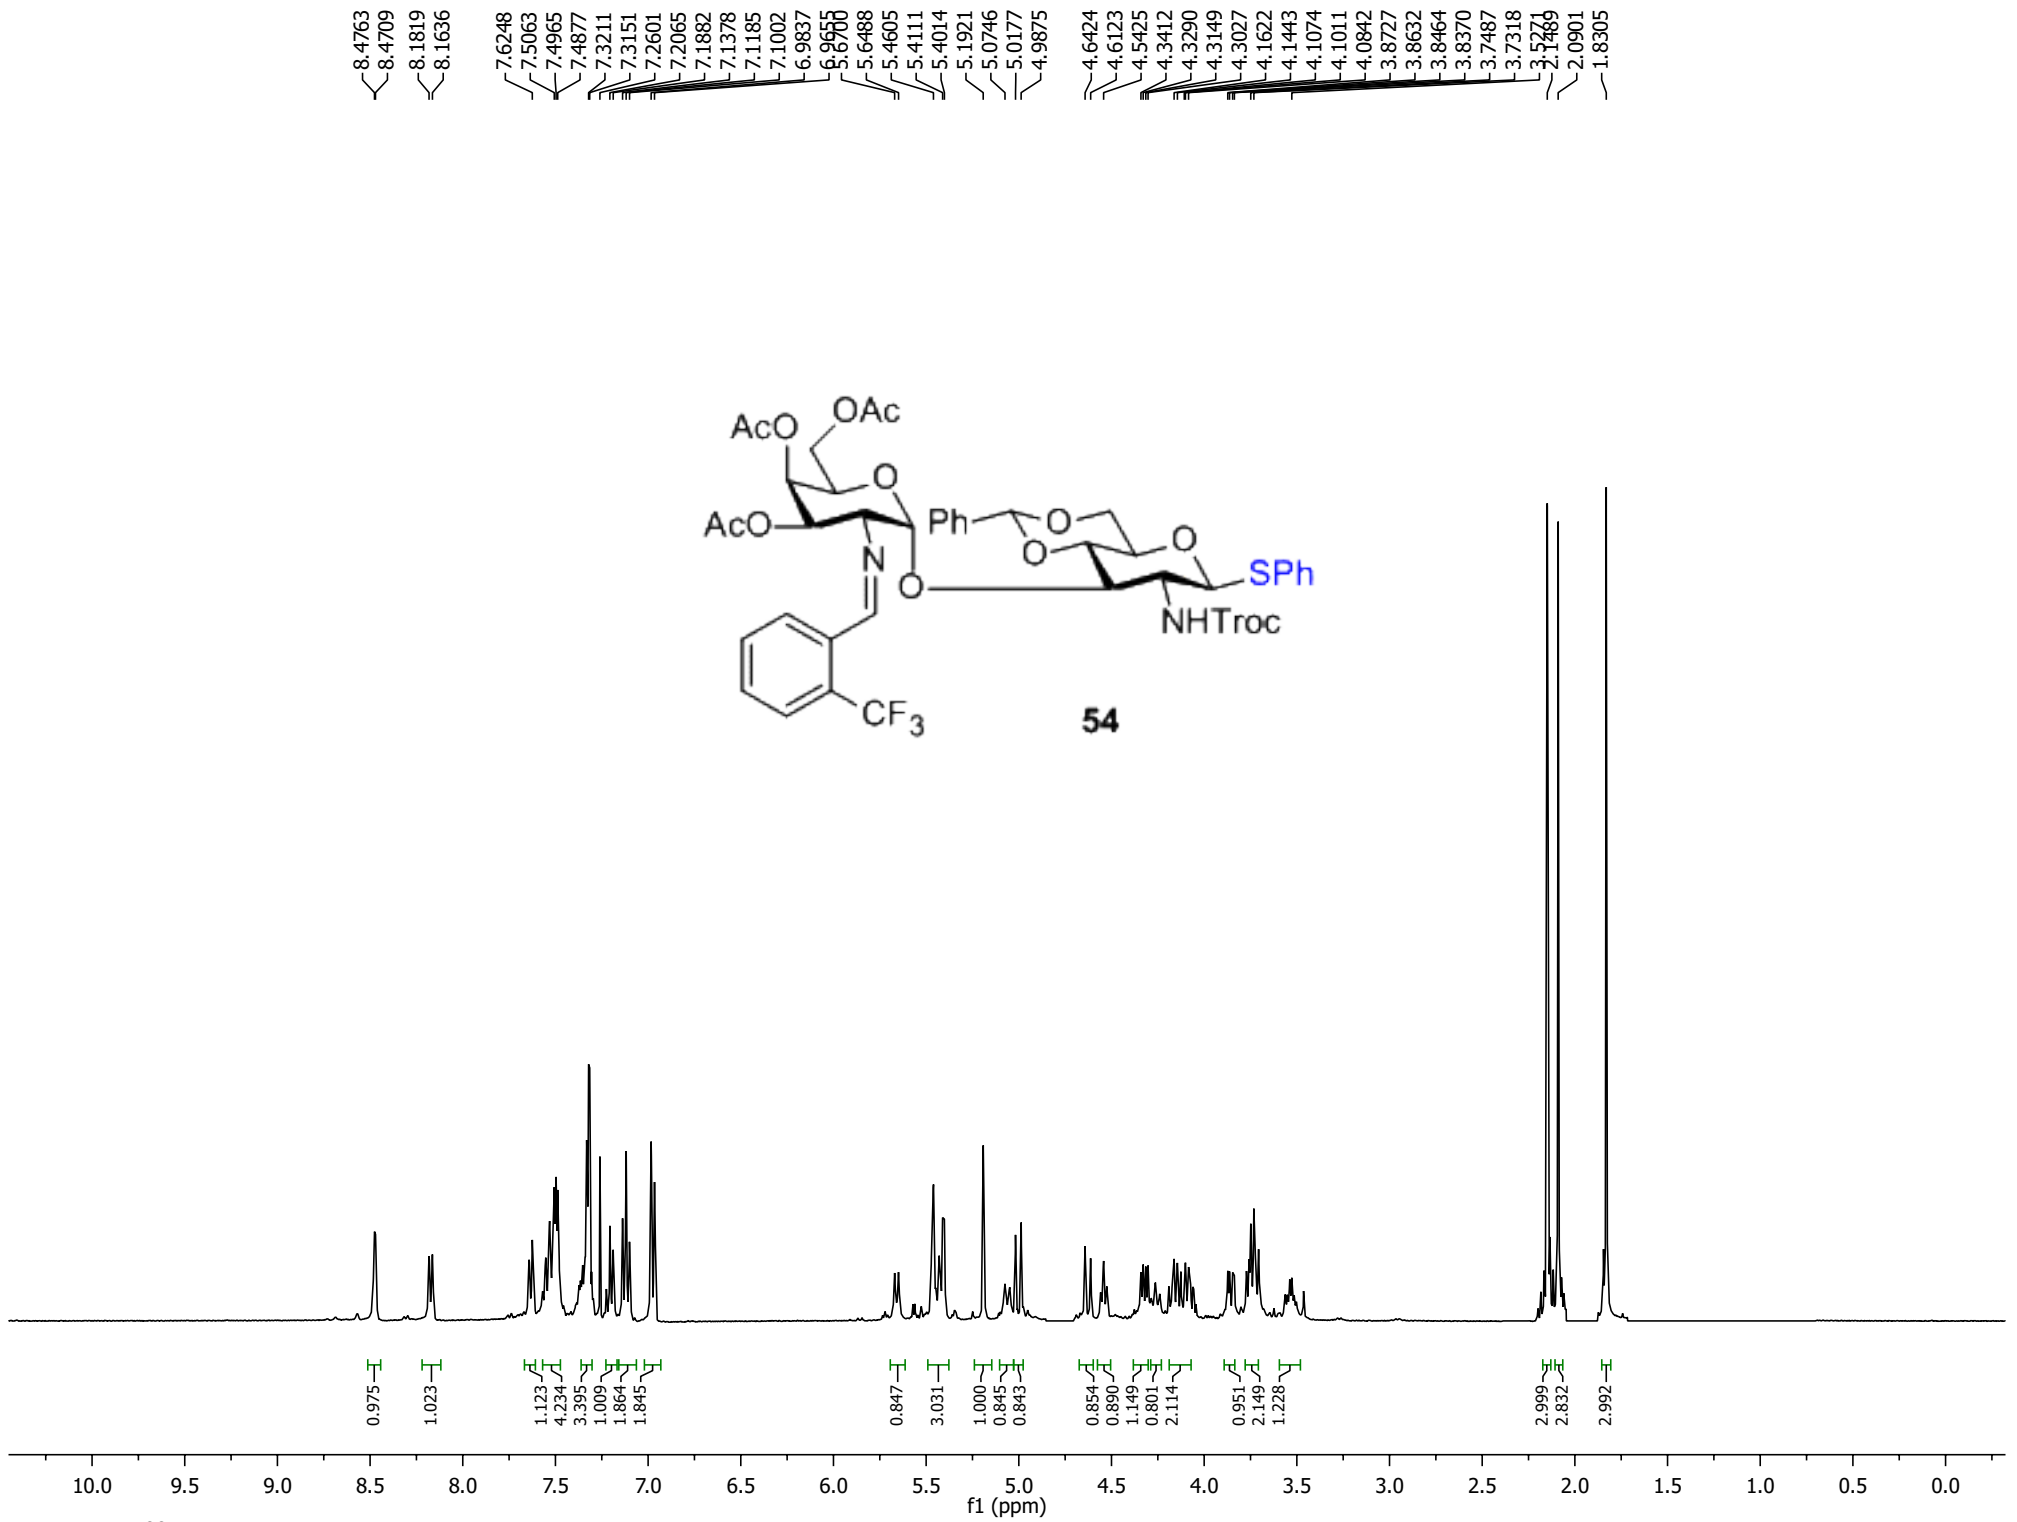



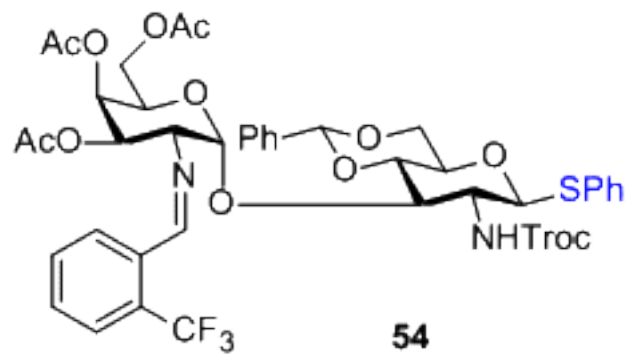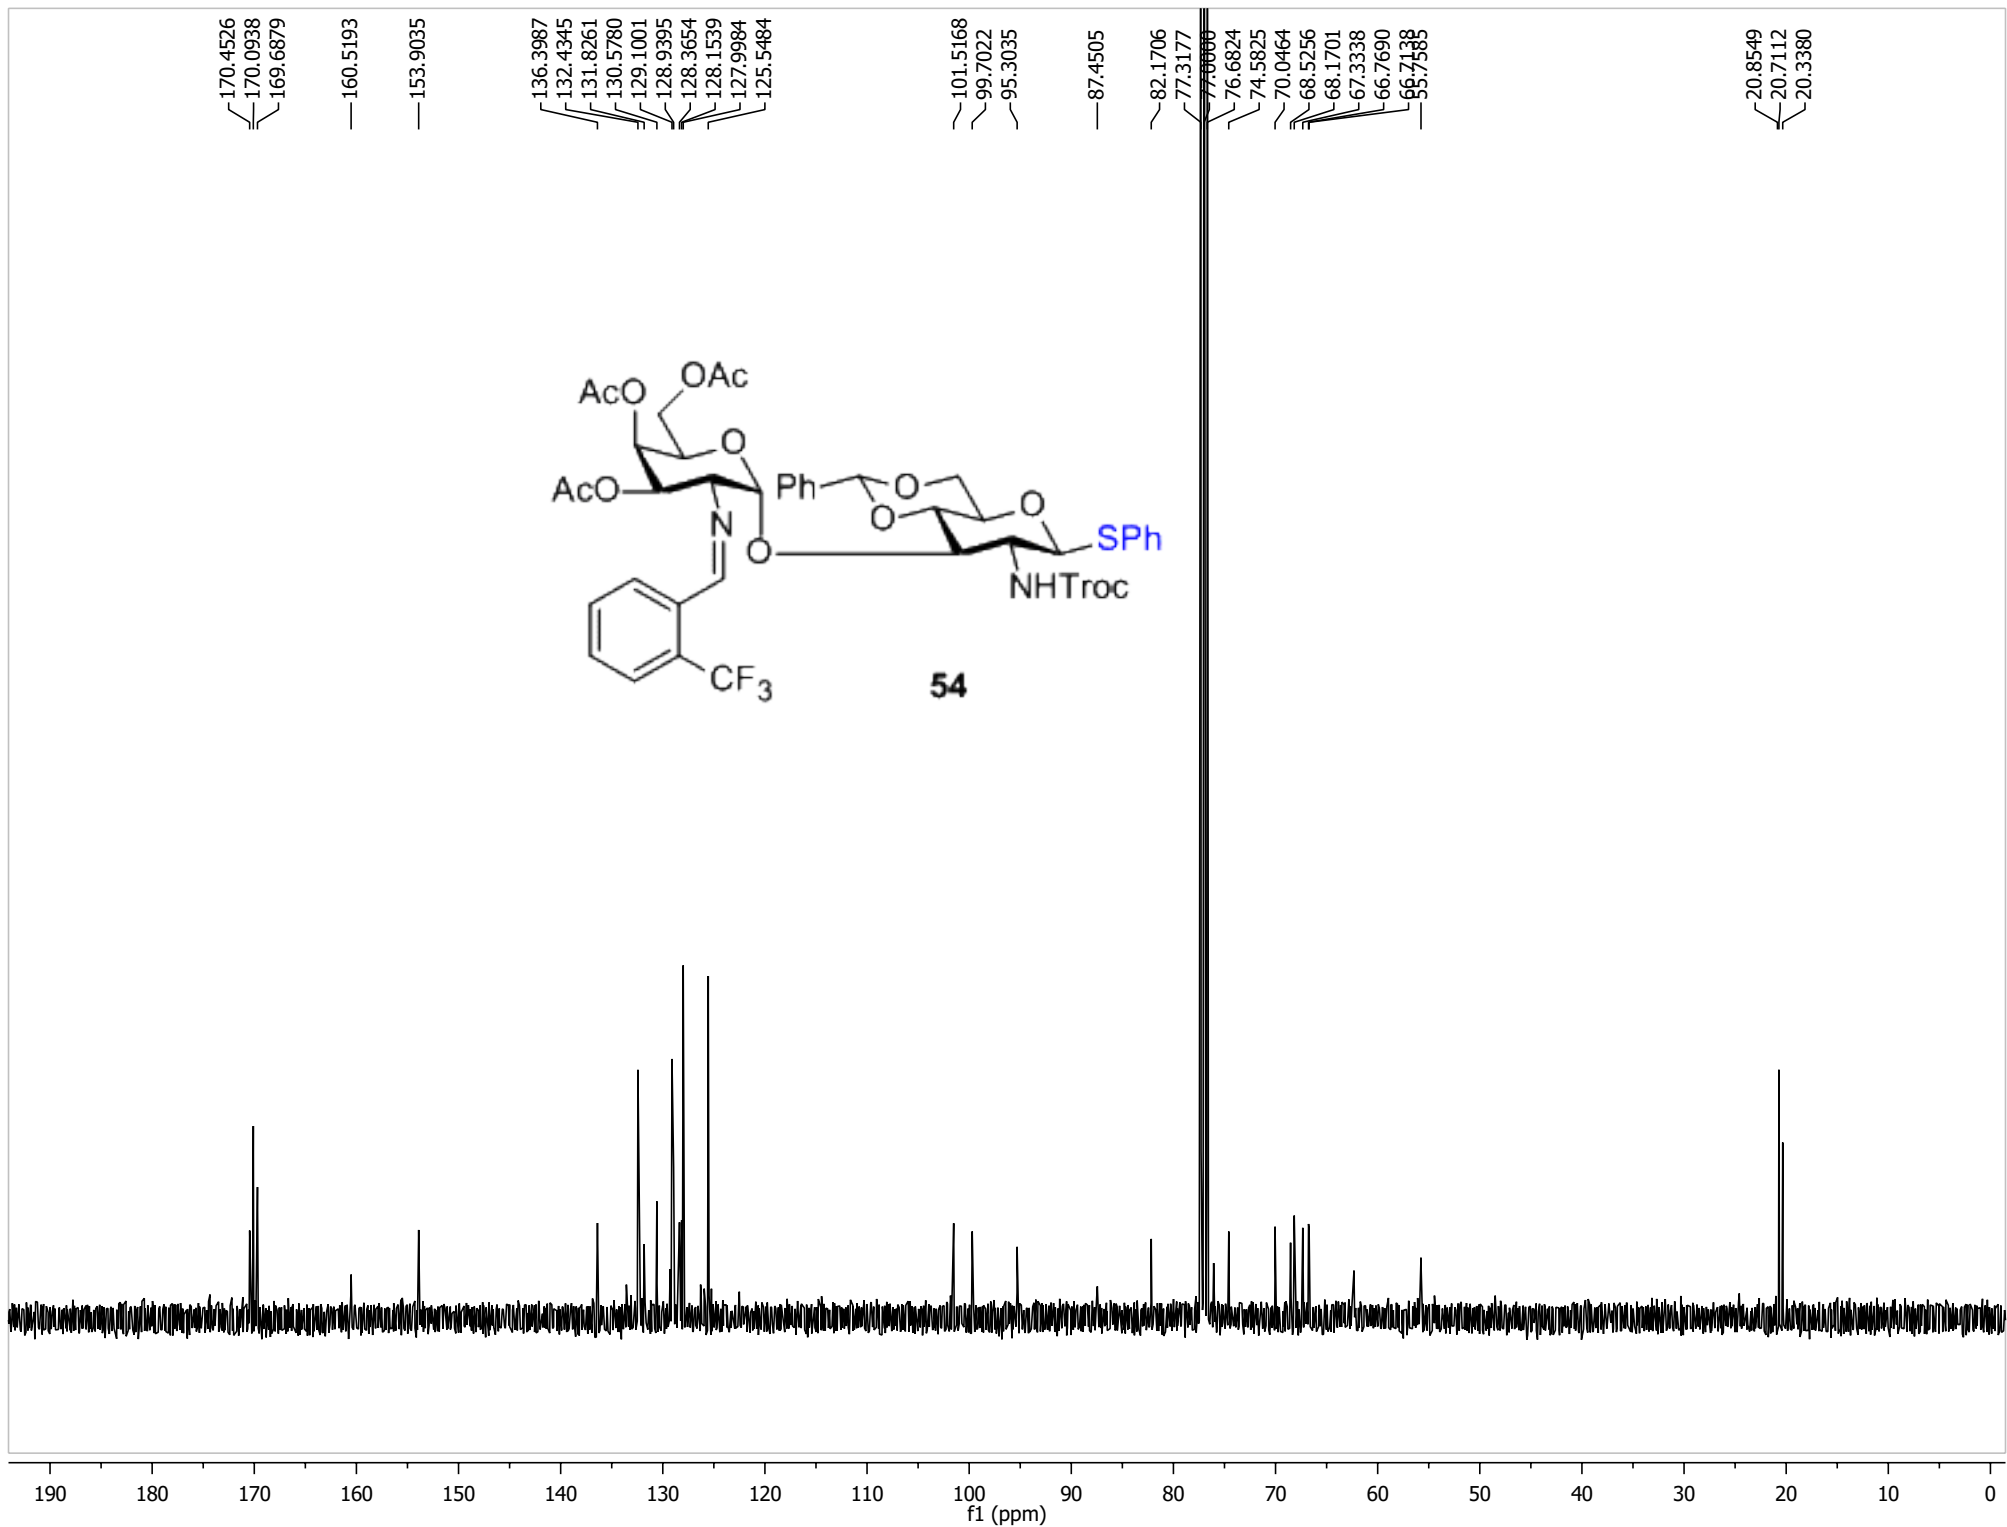

170.4526  
170.0938  
169.6879

160.5193

153.9035

136.3987  
132.4345  
131.8261  
130.5780  
129.1001  
128.9395  
128.3654  
128.1539  
127.9984  
125.5484

101.5168  
99.7022  
95.3035

87.4505

82.1706  
77.3177

77.0090

76.6824  
74.5825

70.0464  
68.5256

68.1701  
67.3338

66.7690  
66.7138

65.7585

20.8549  
20.7112  
20.3380

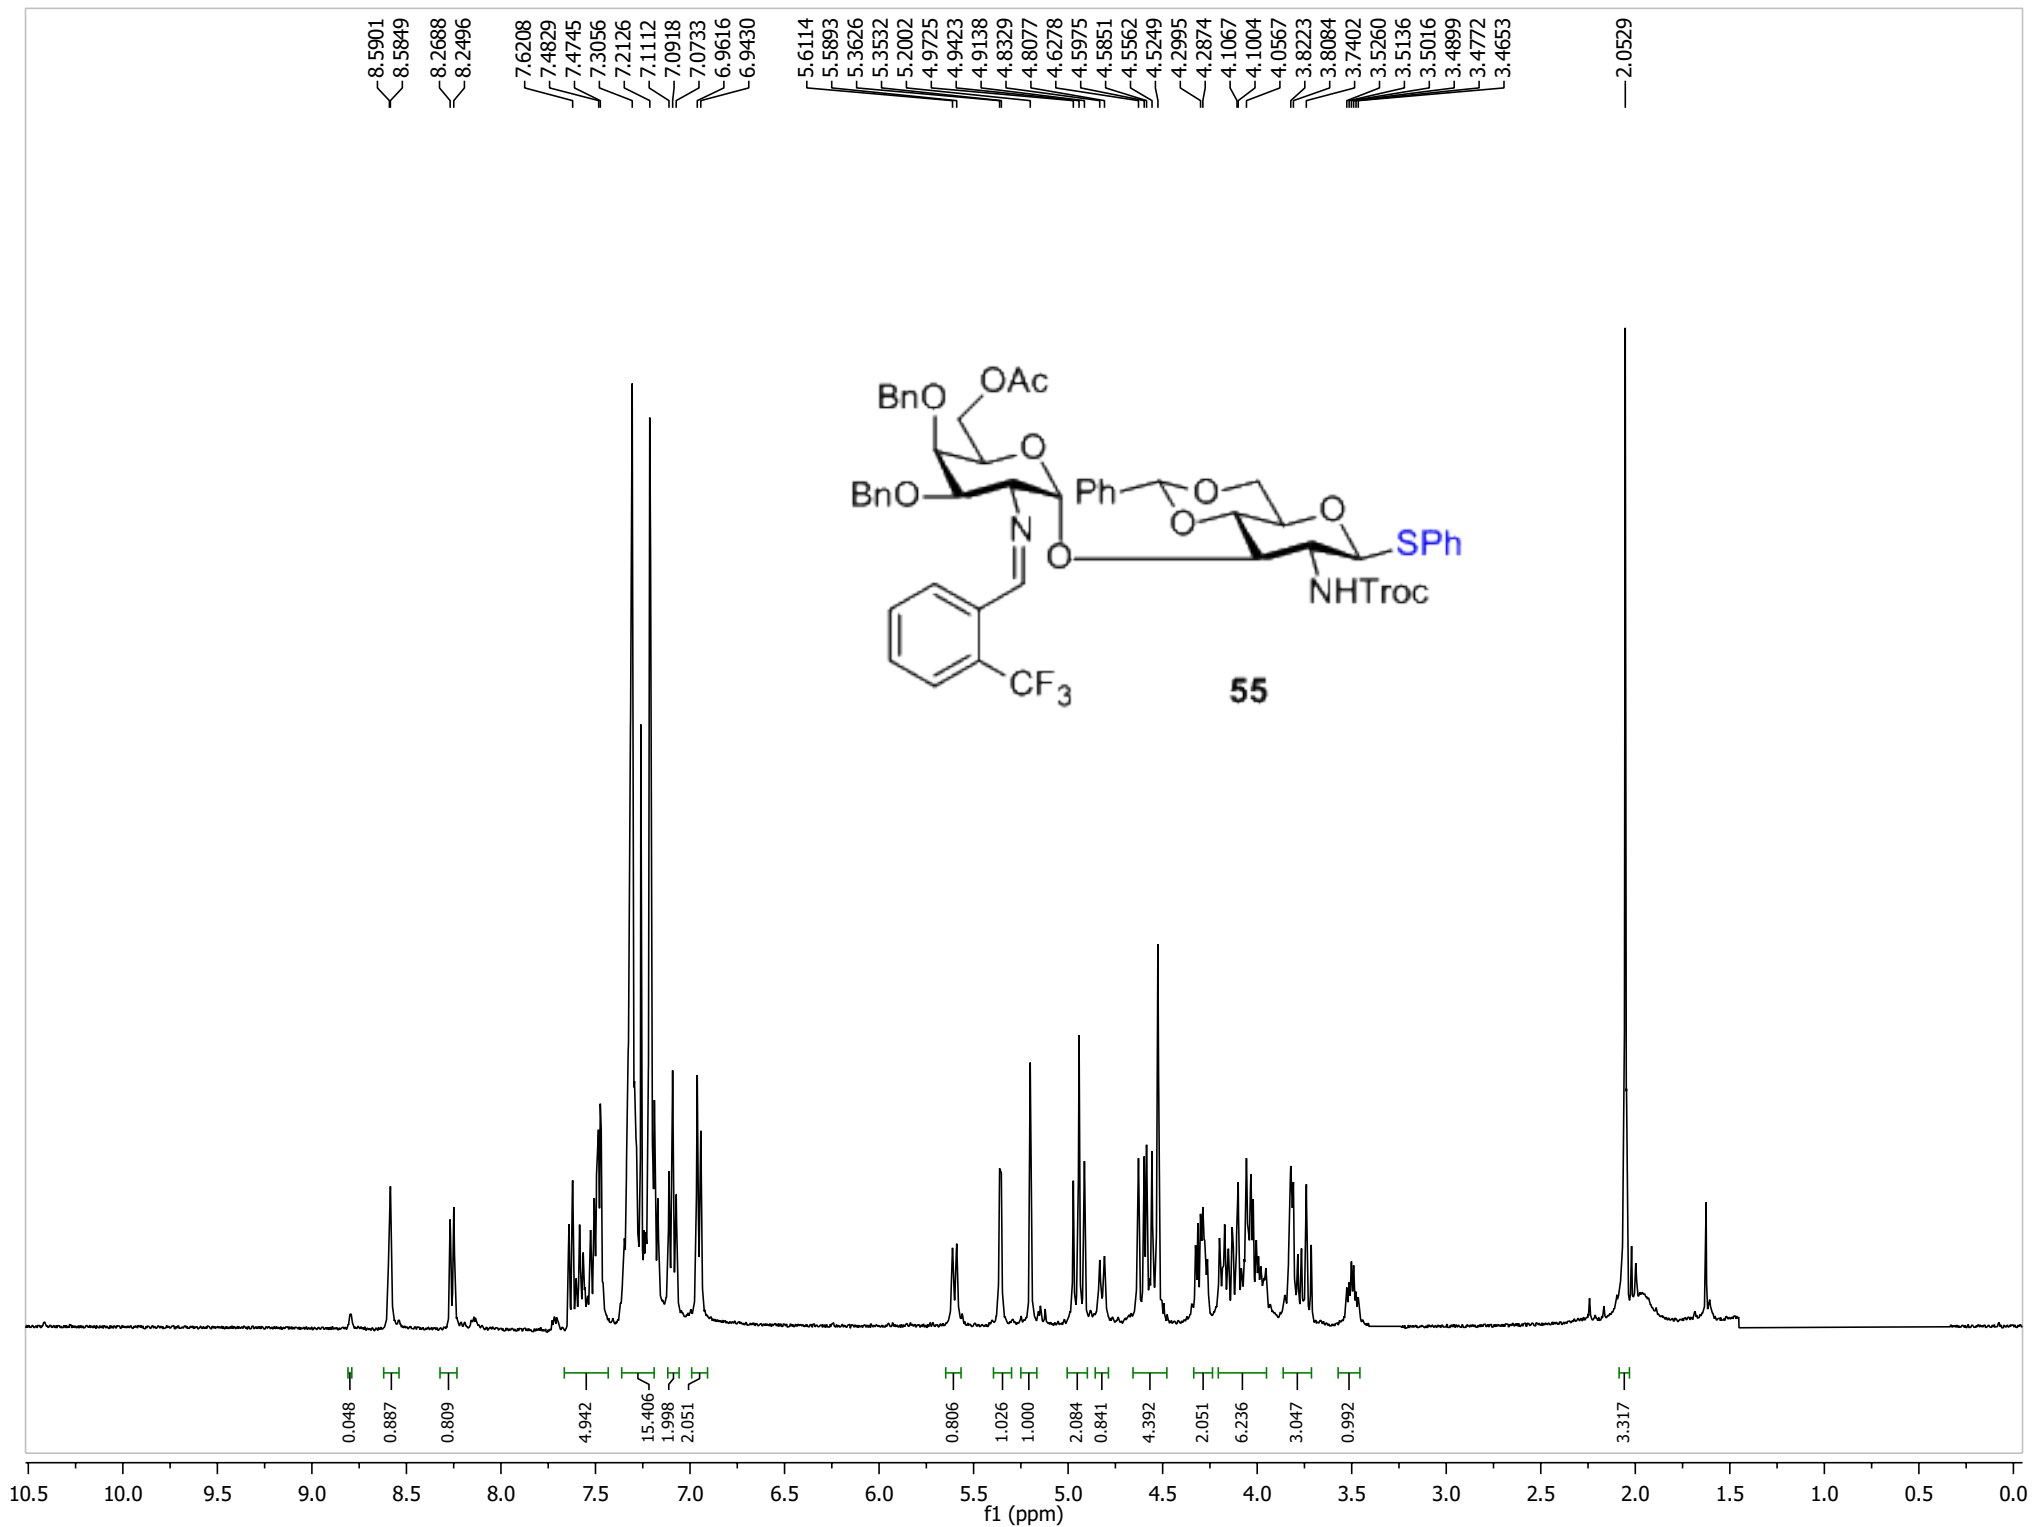

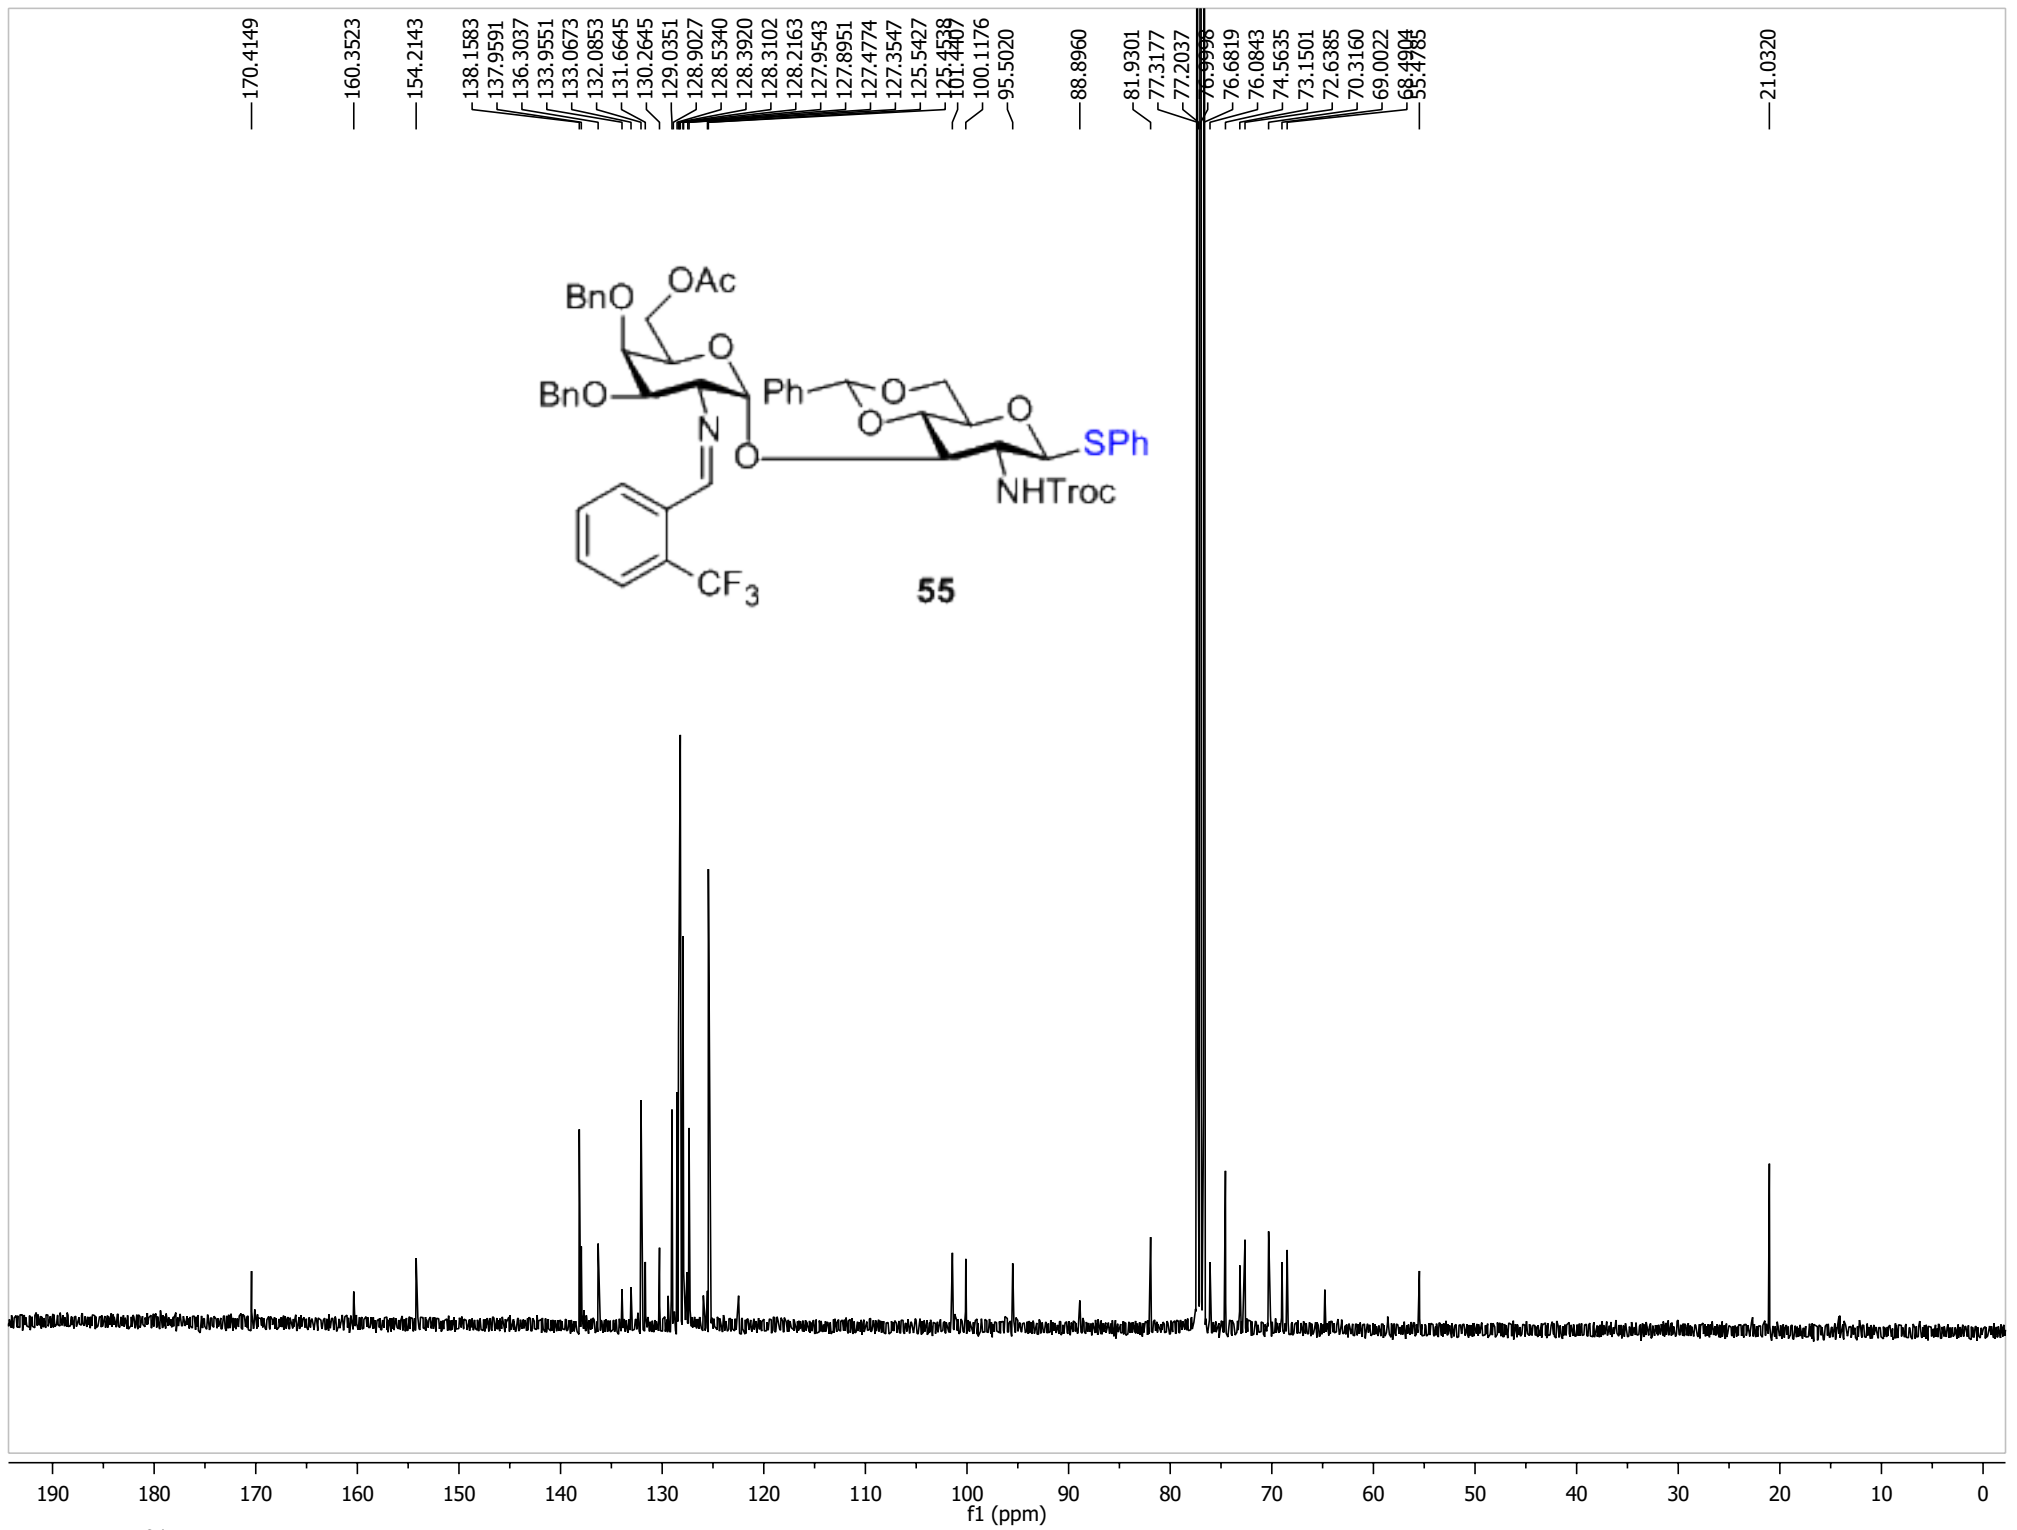

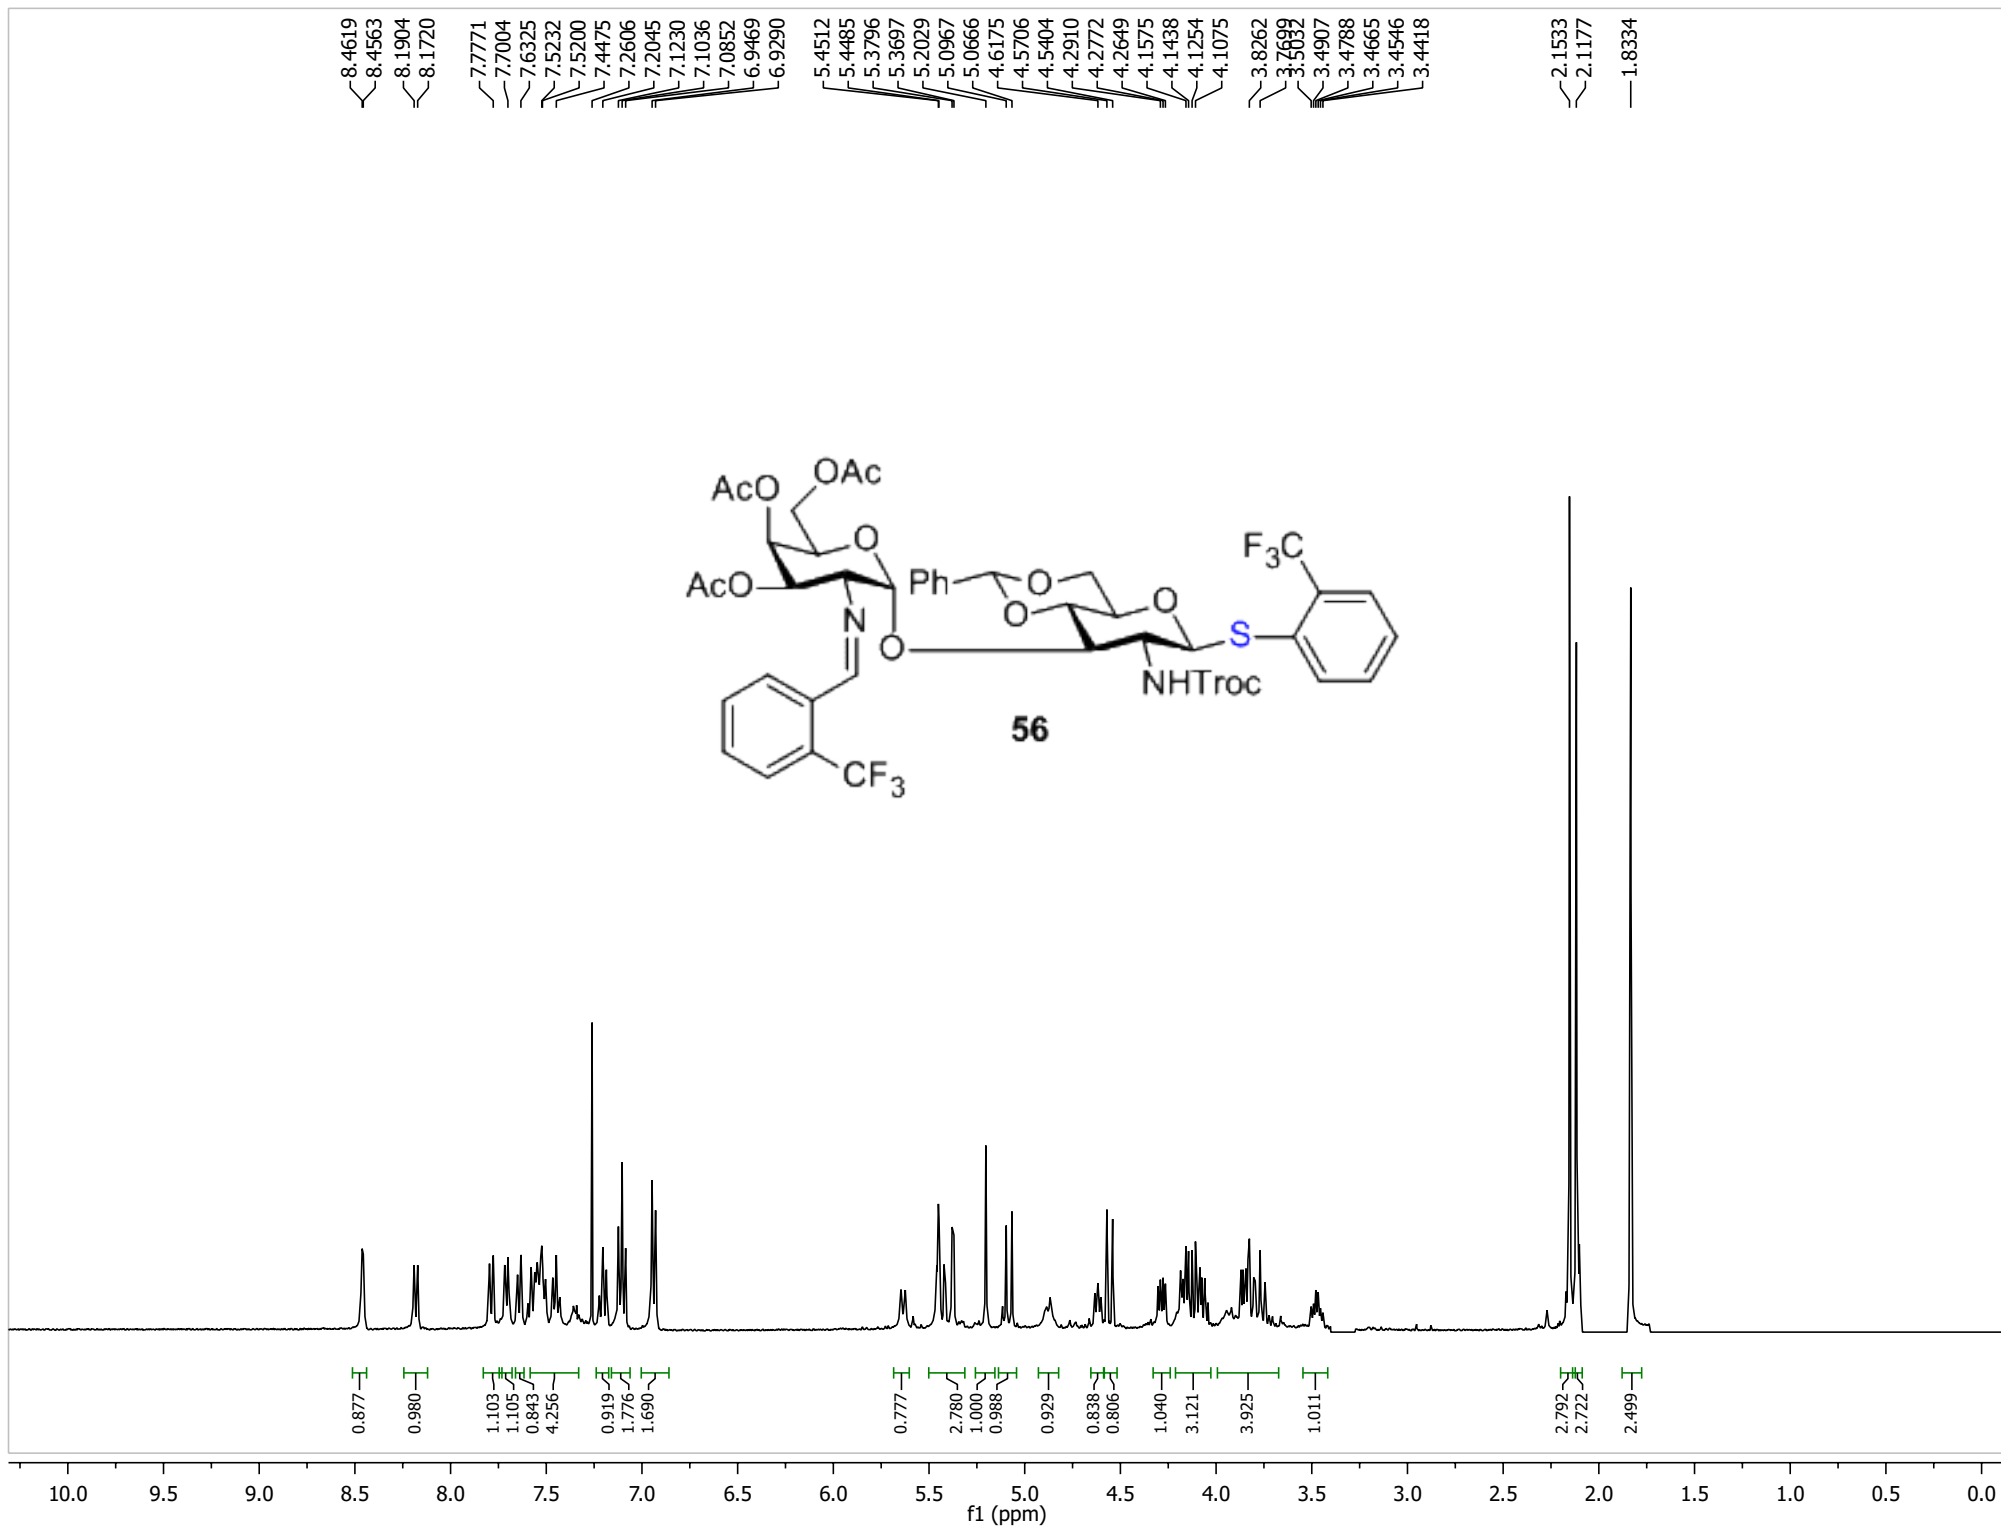

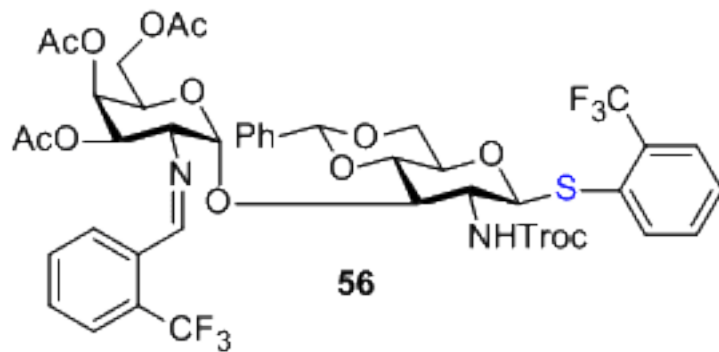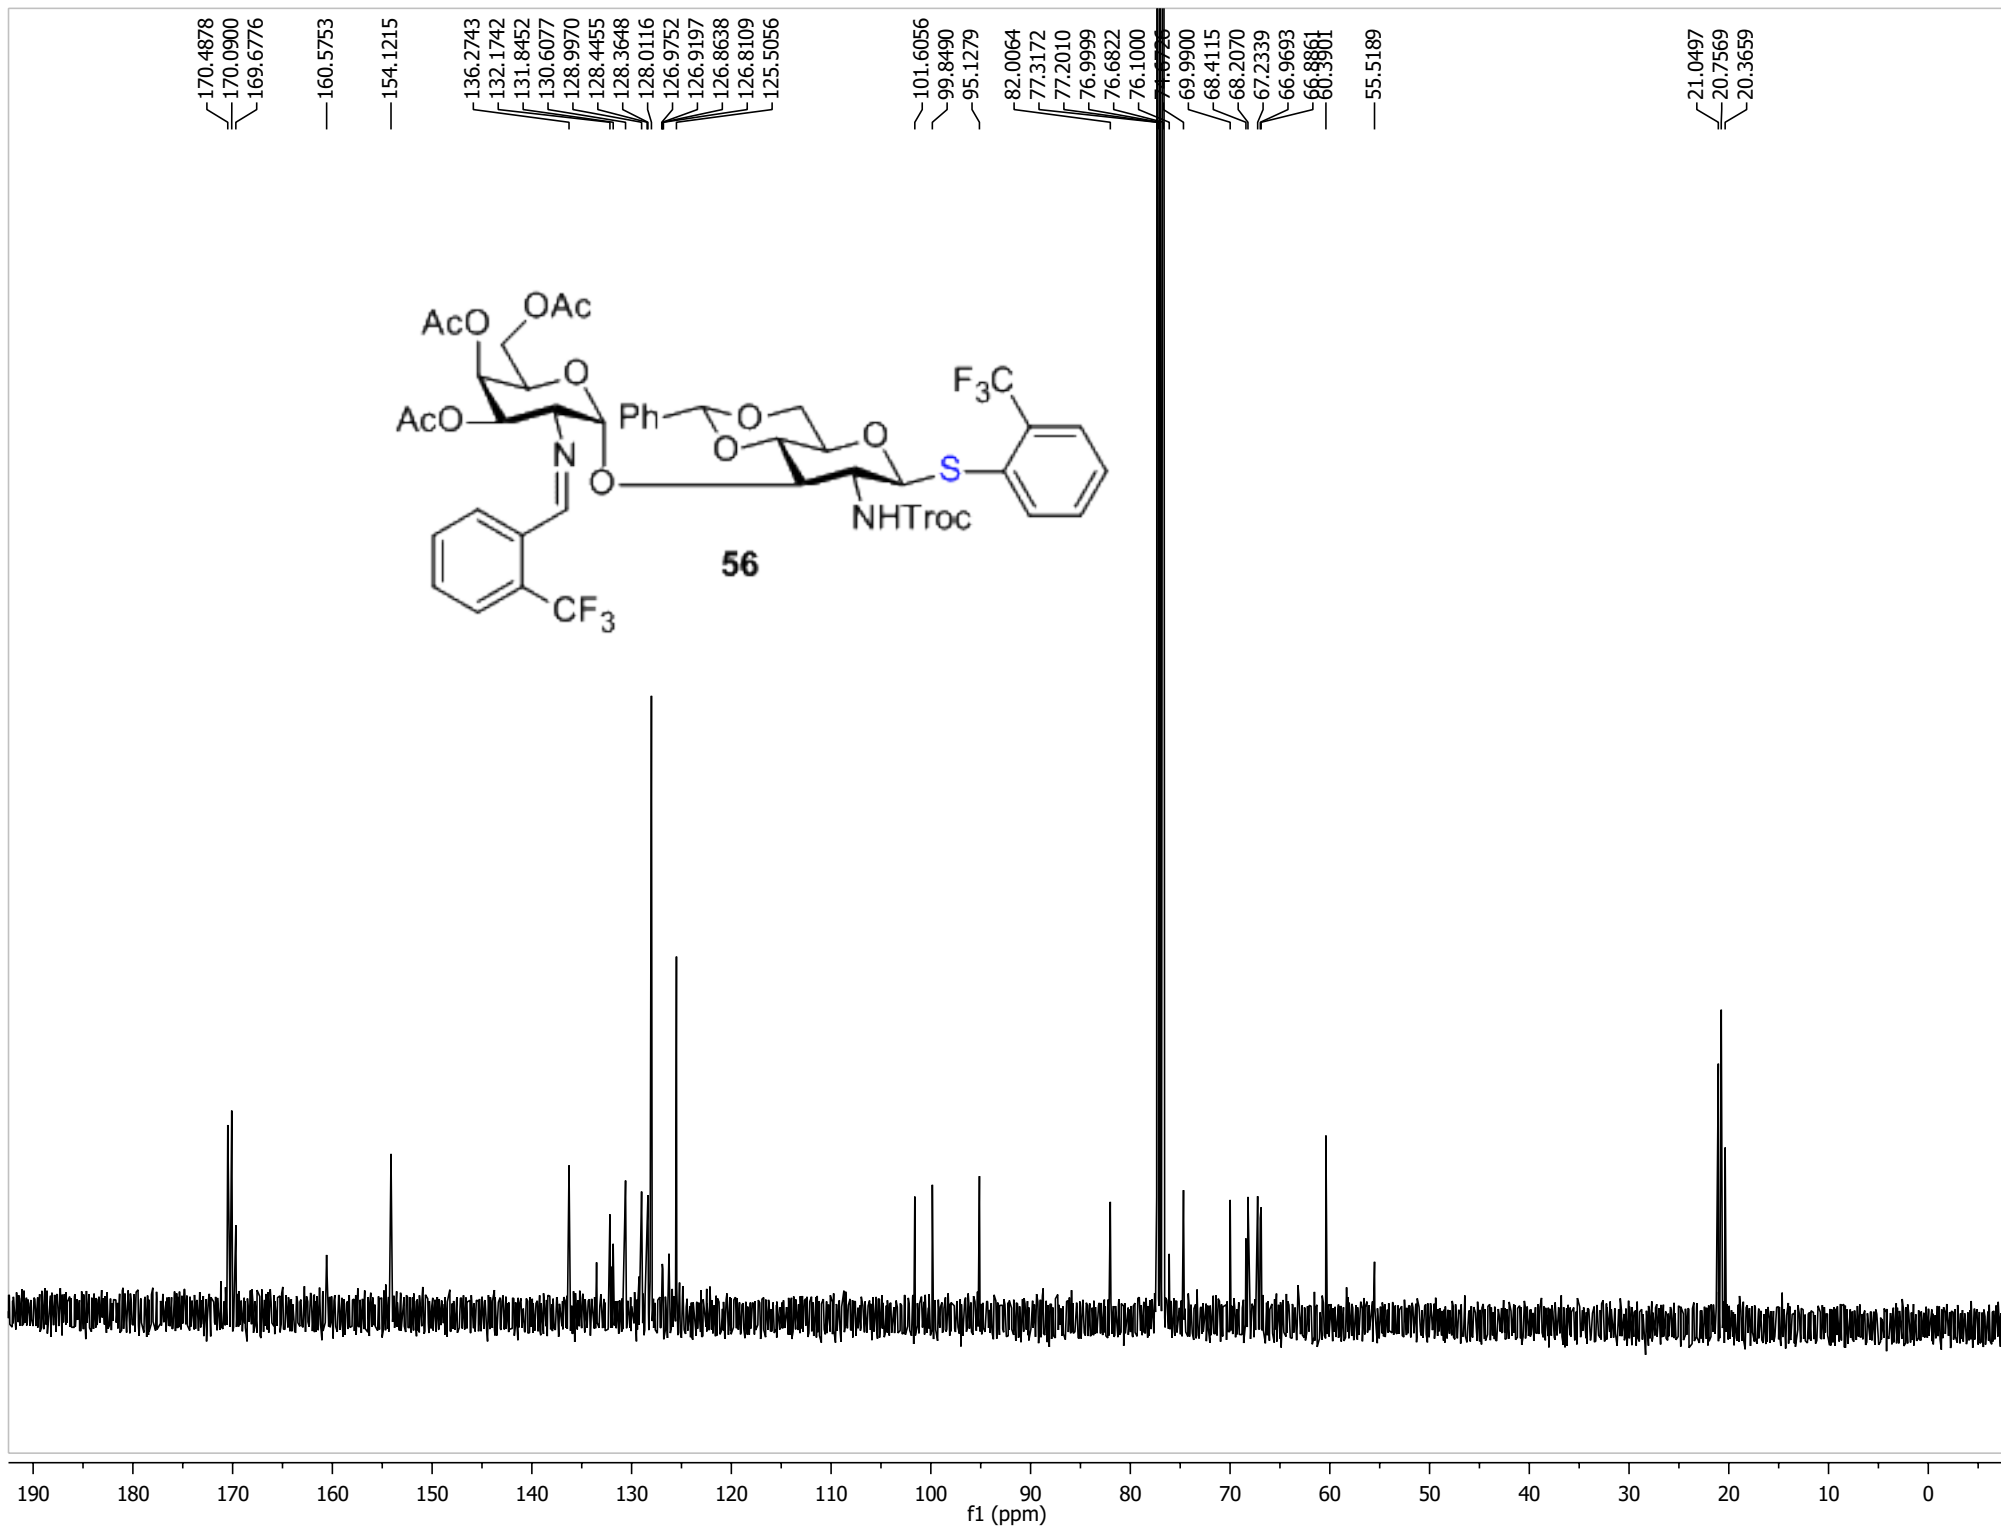

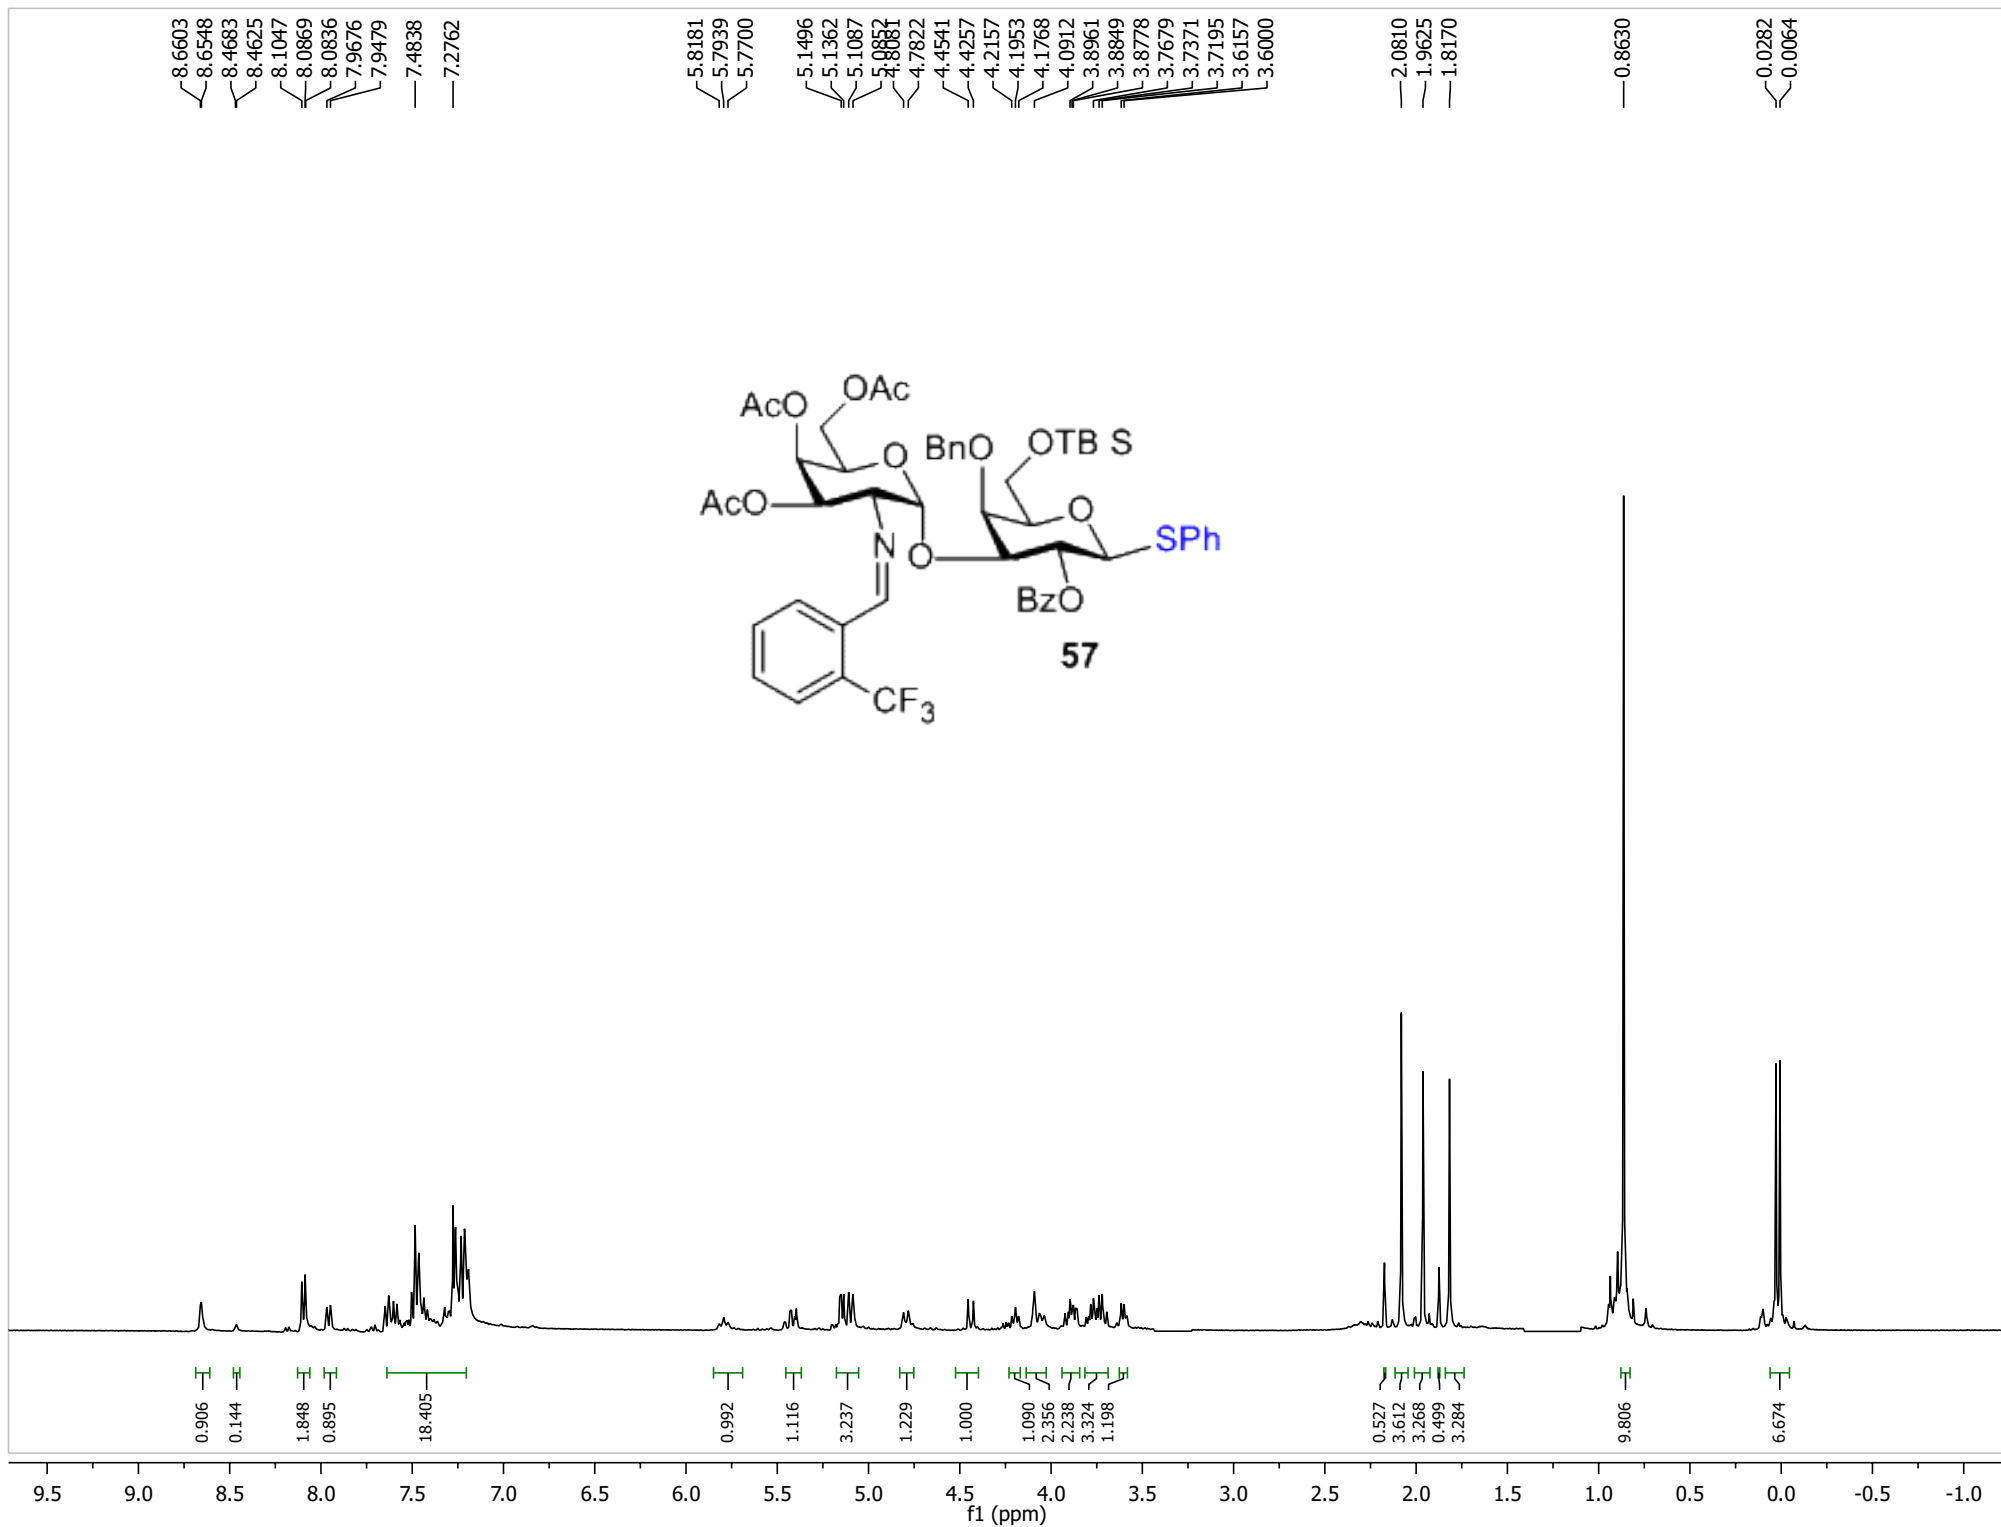

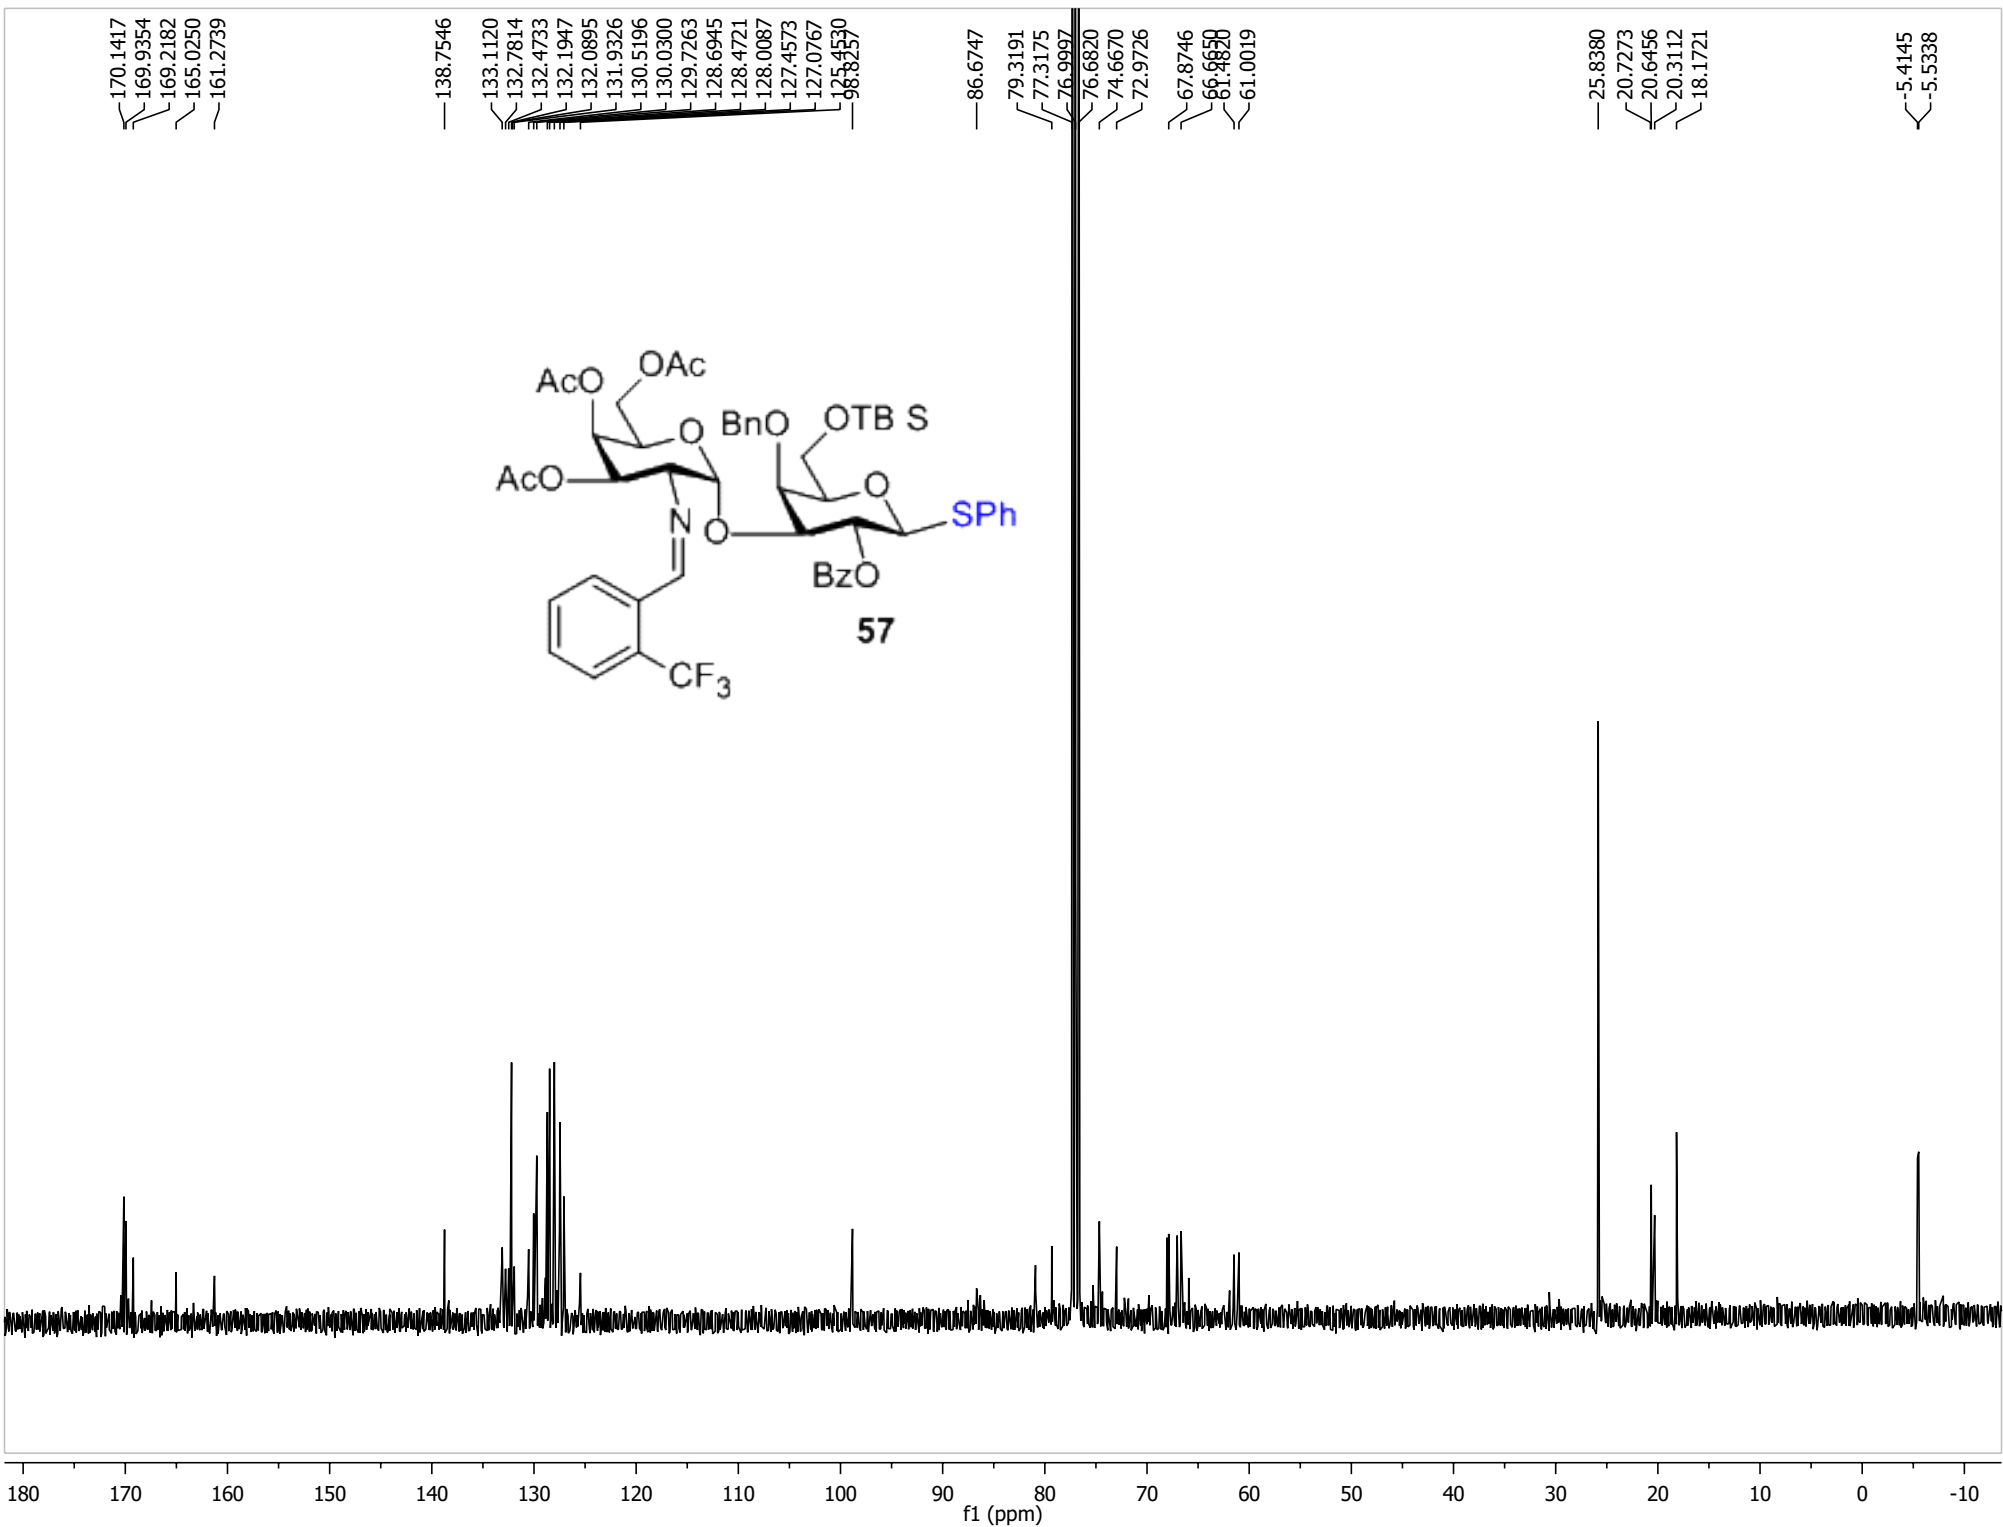

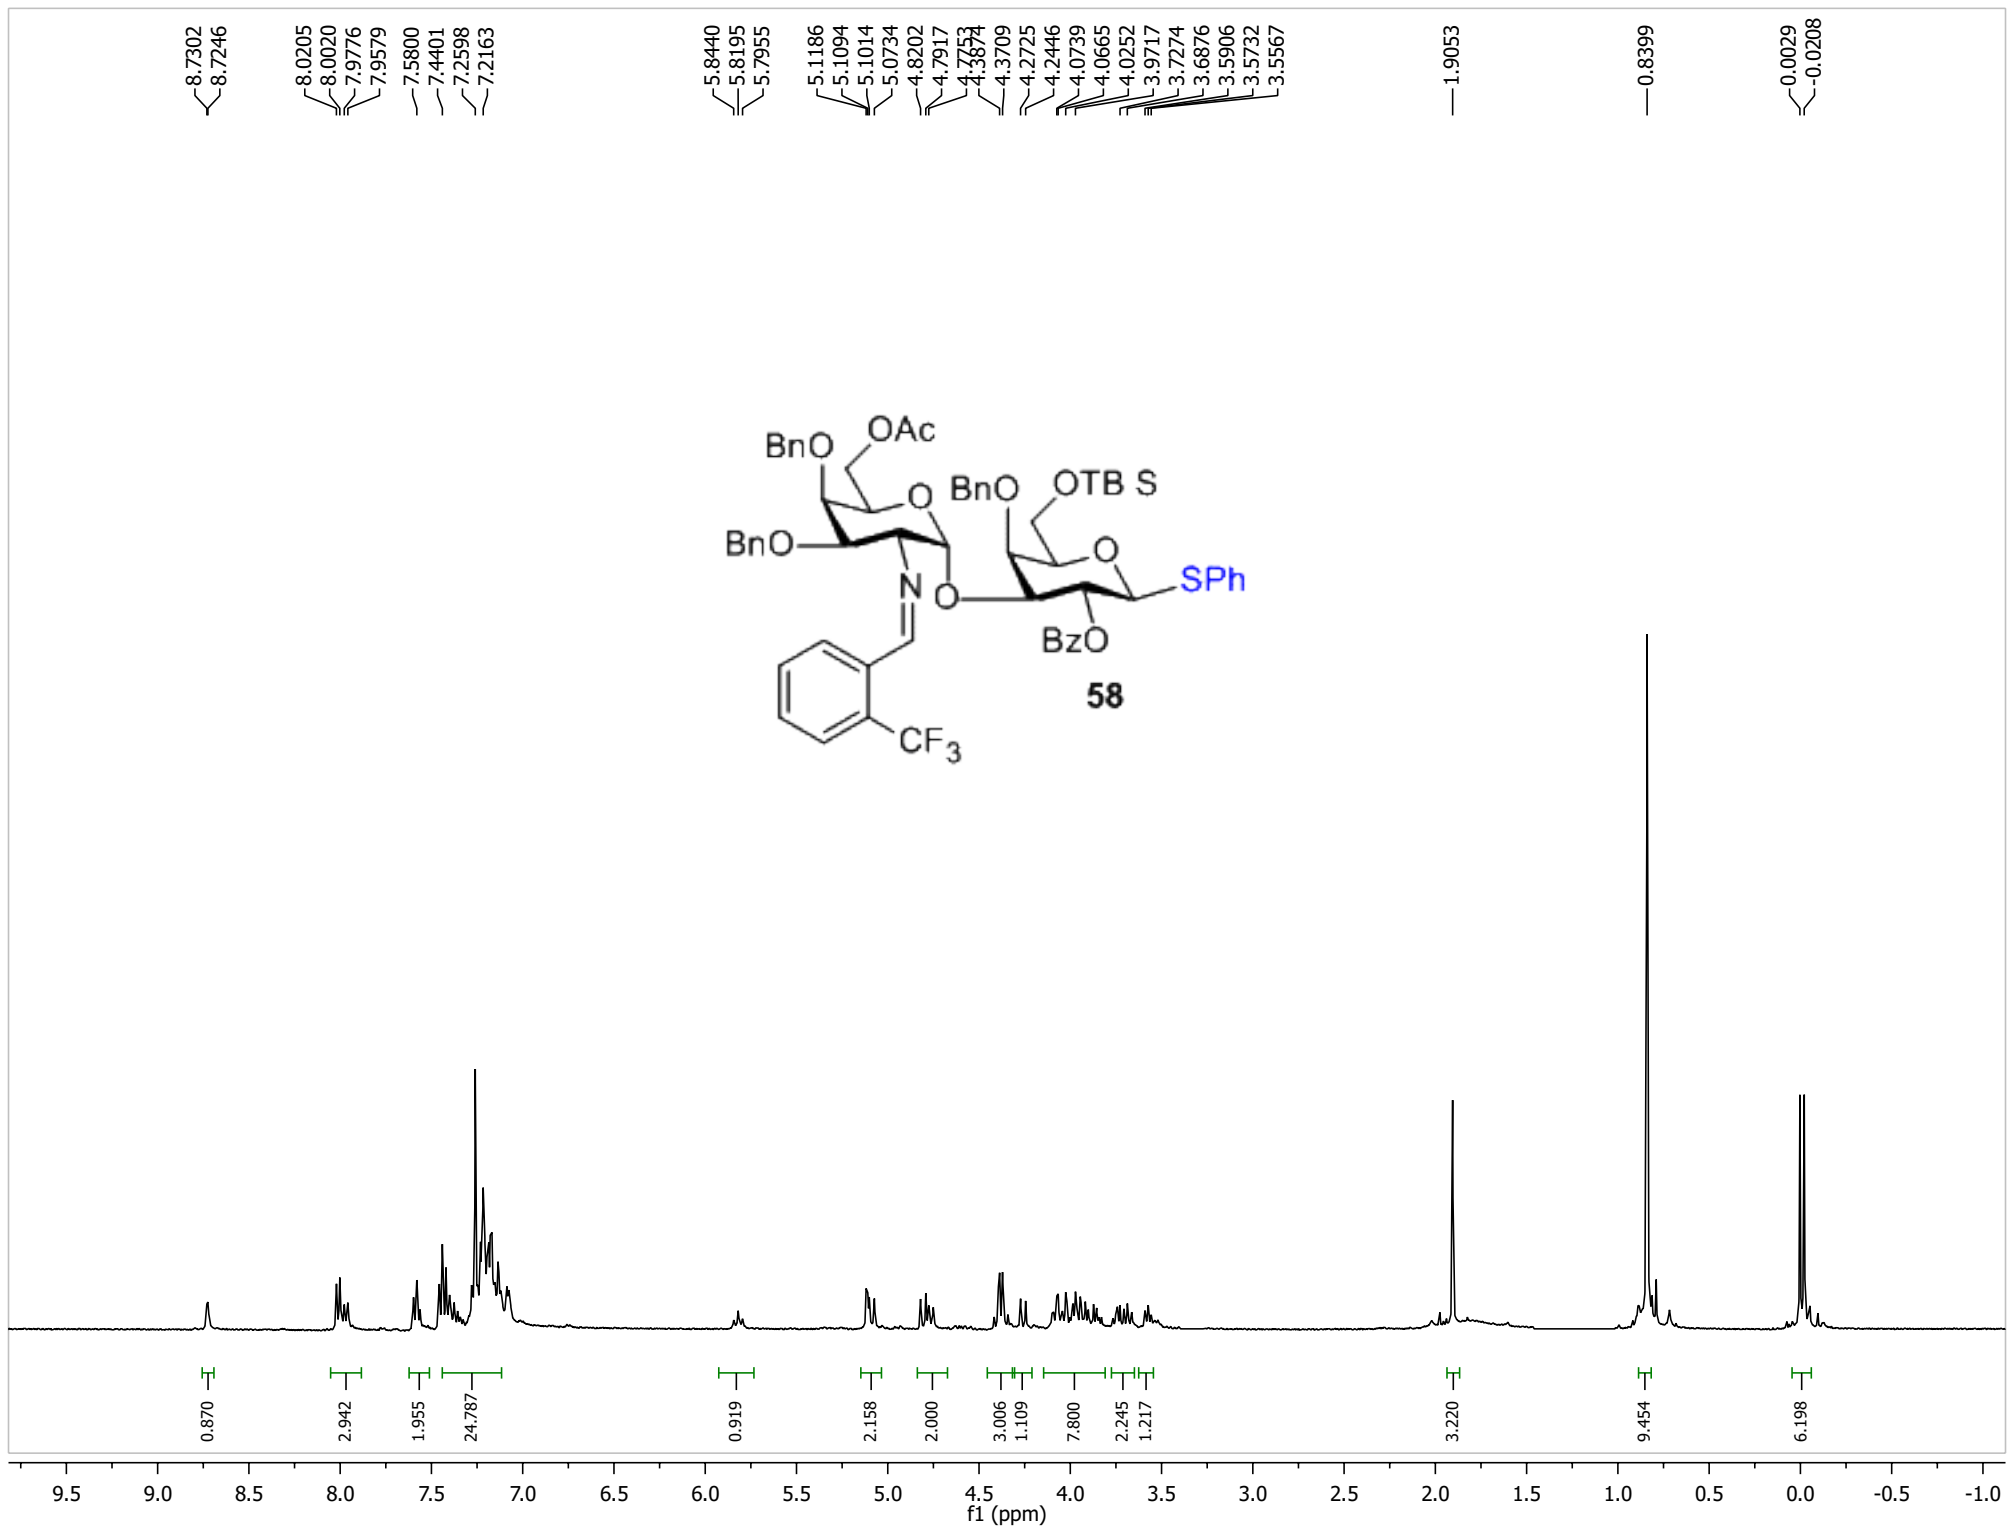



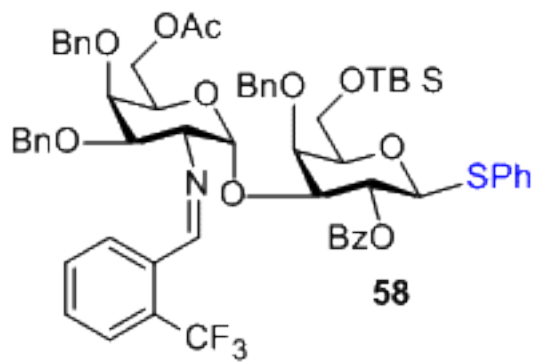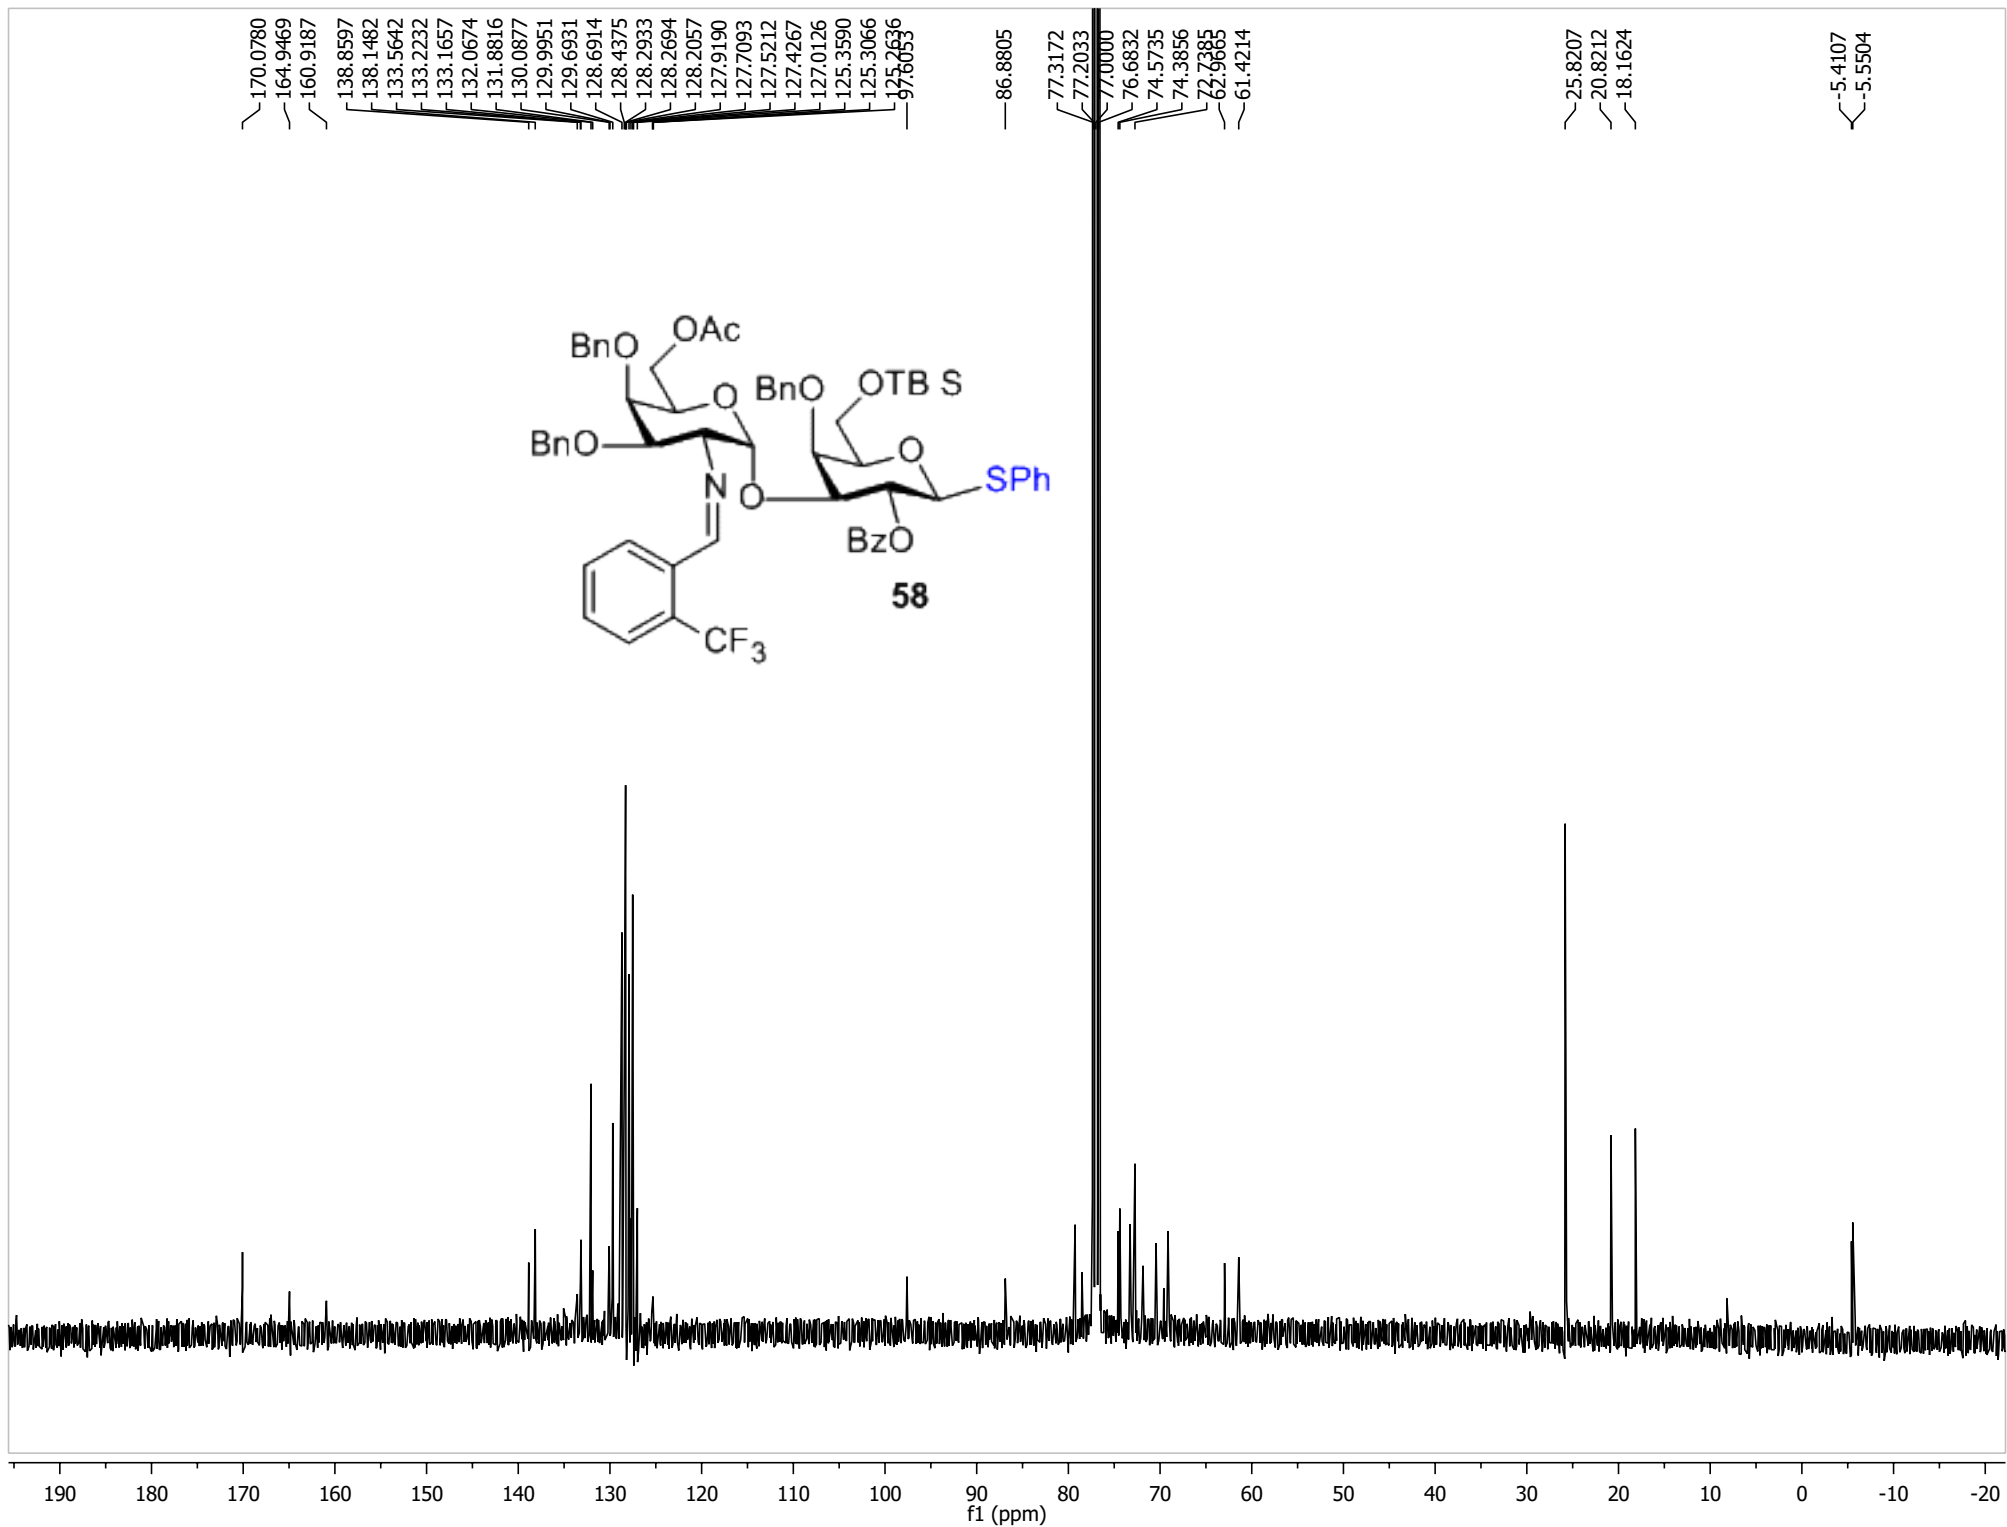

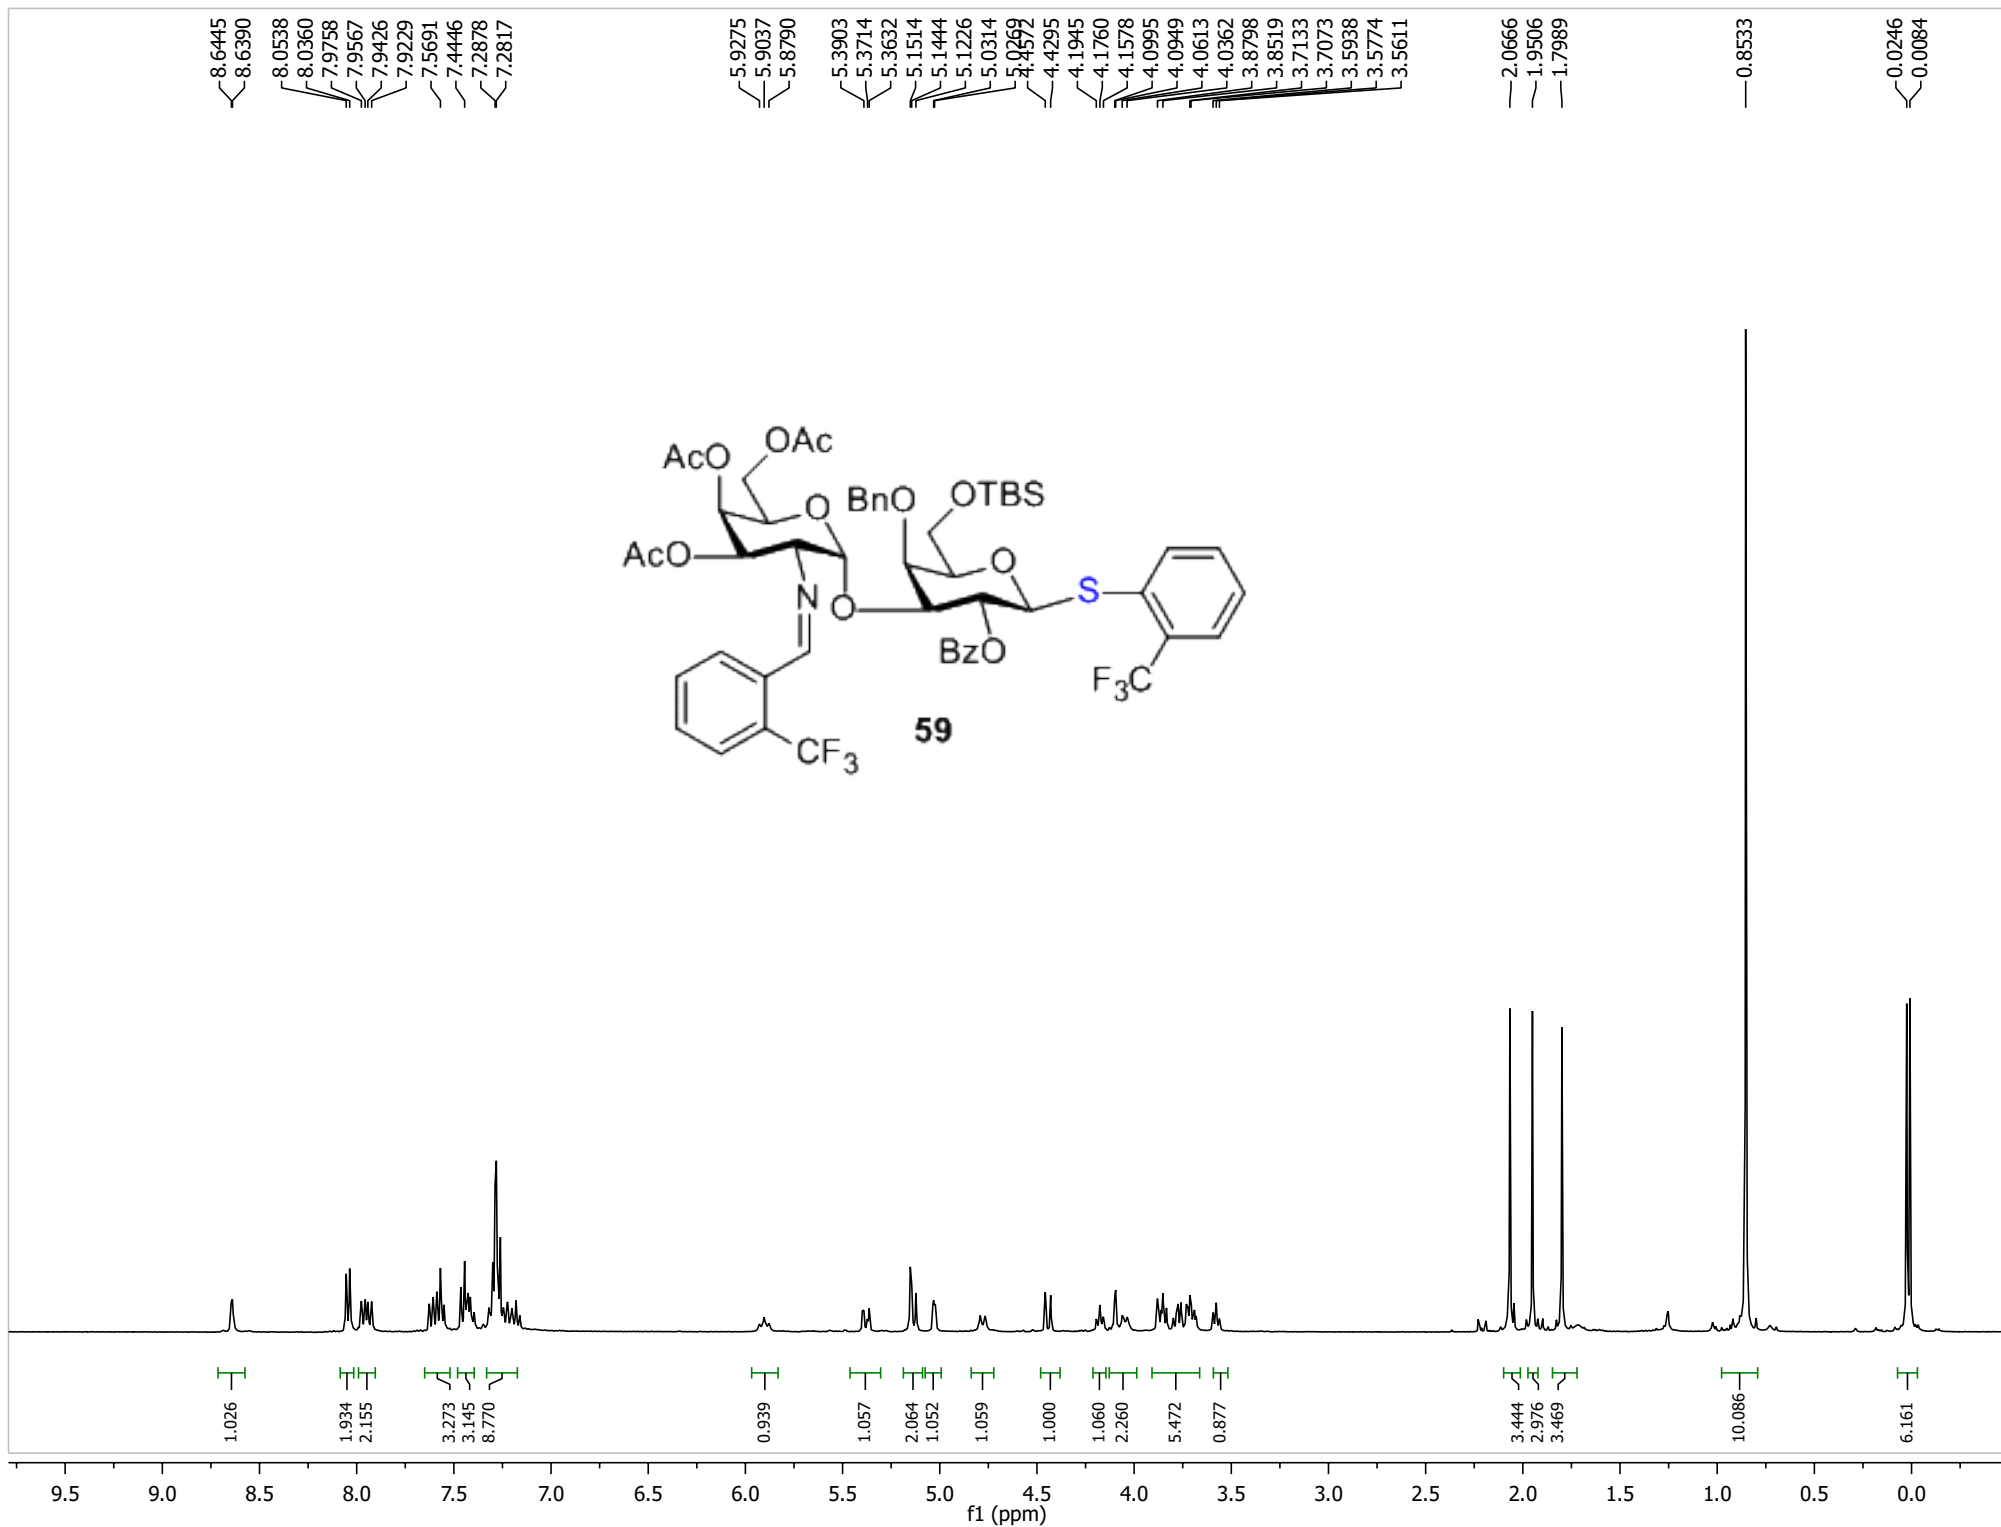

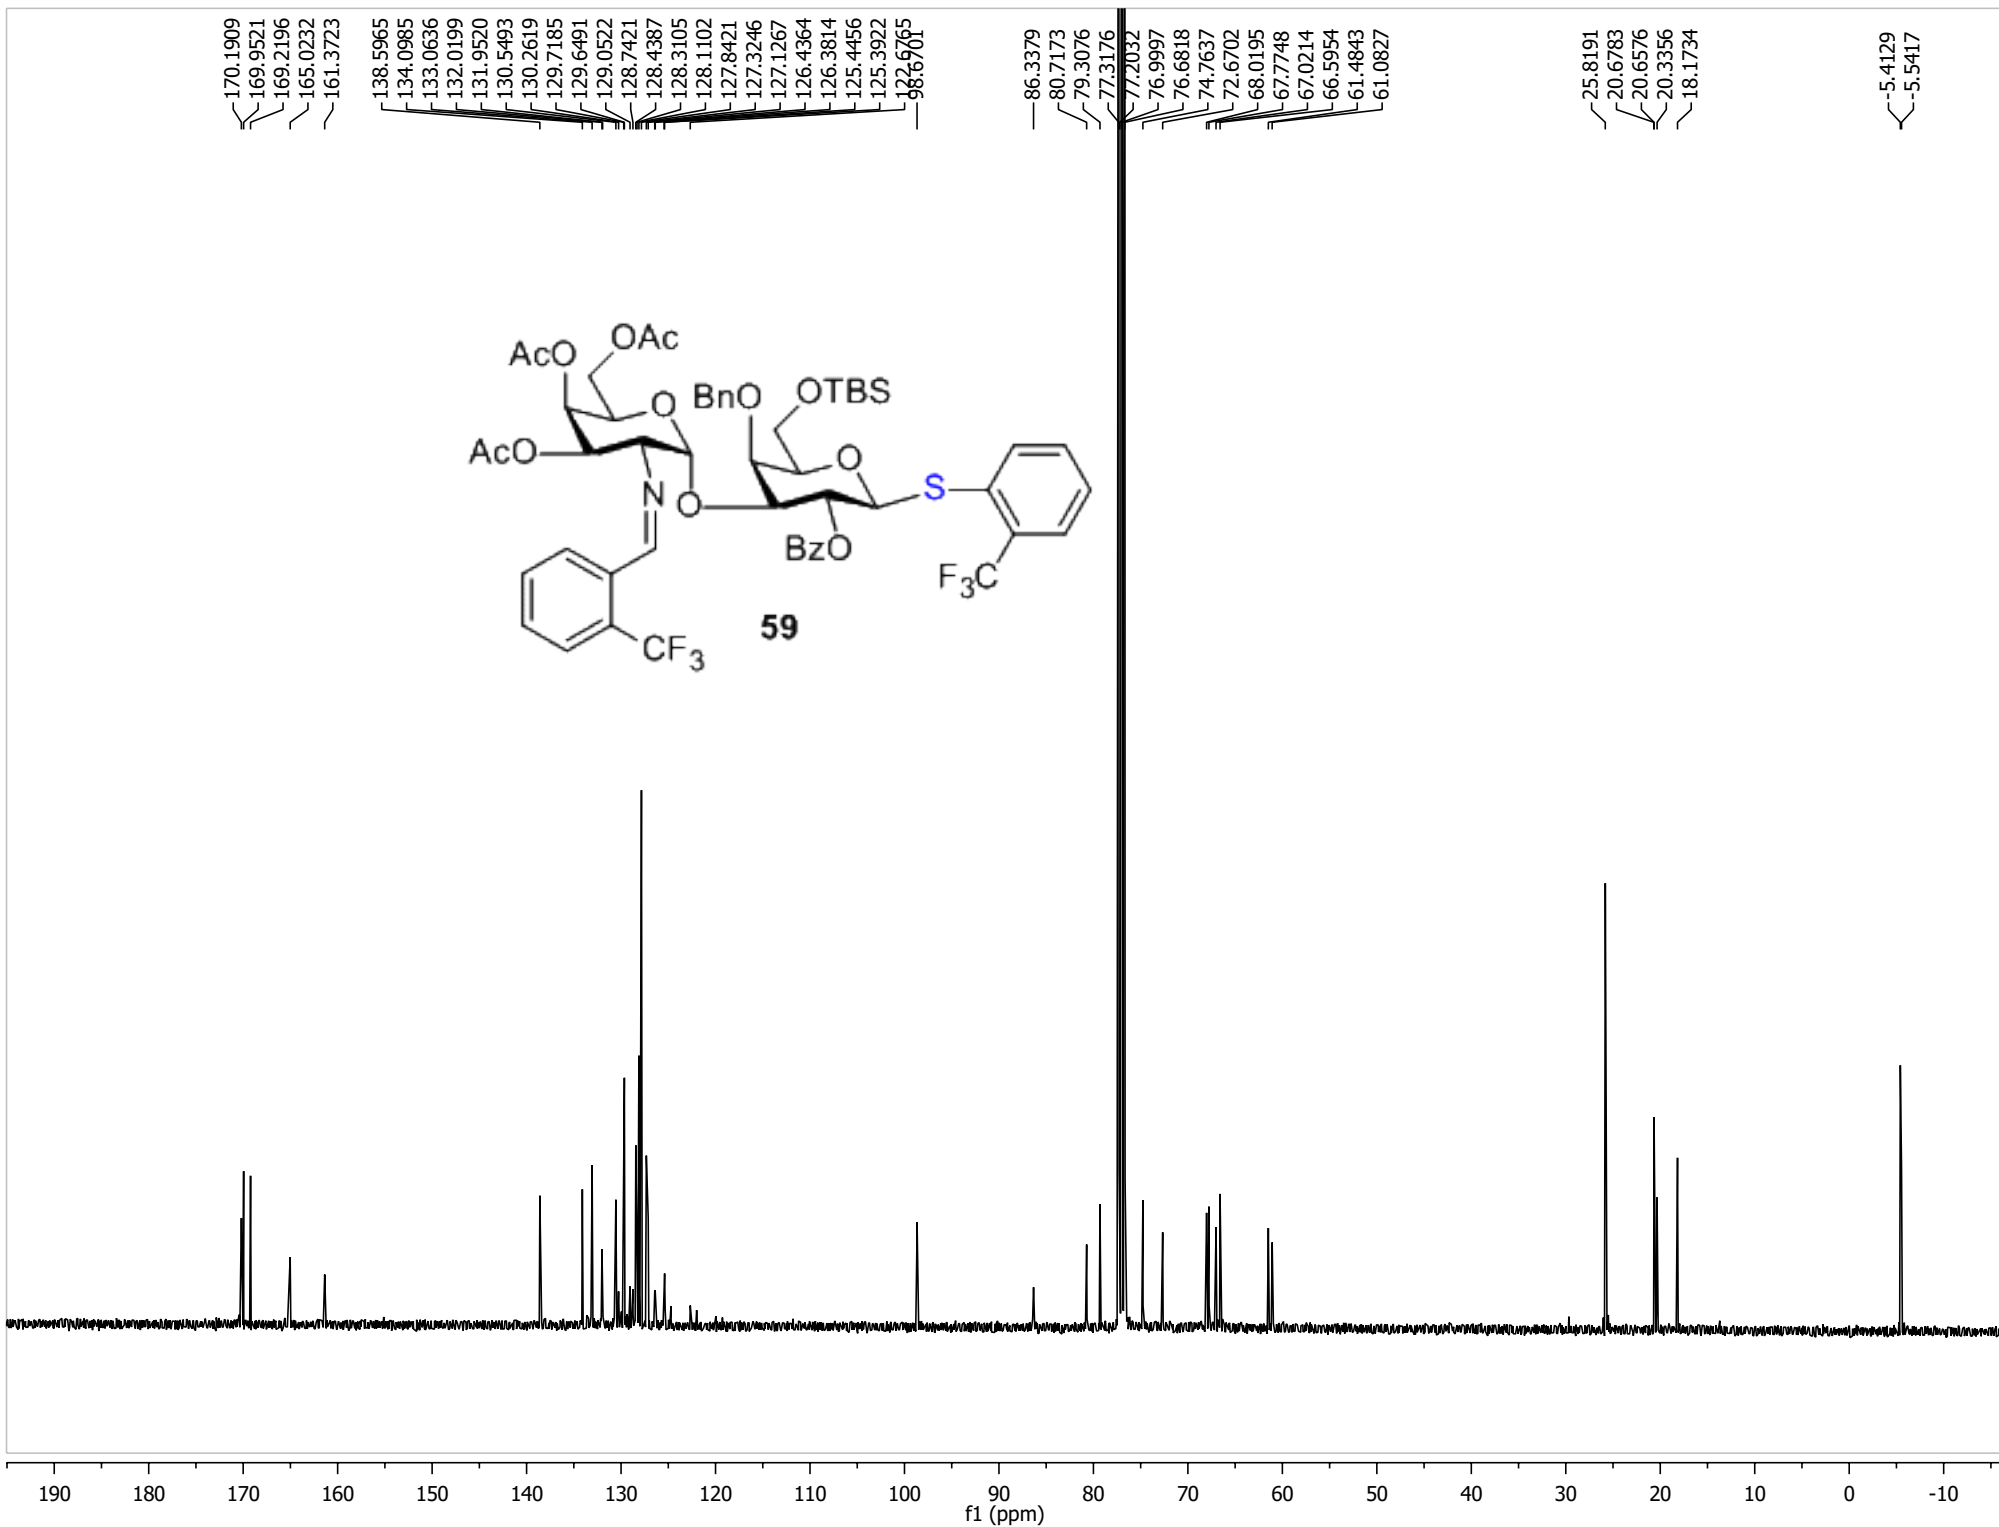

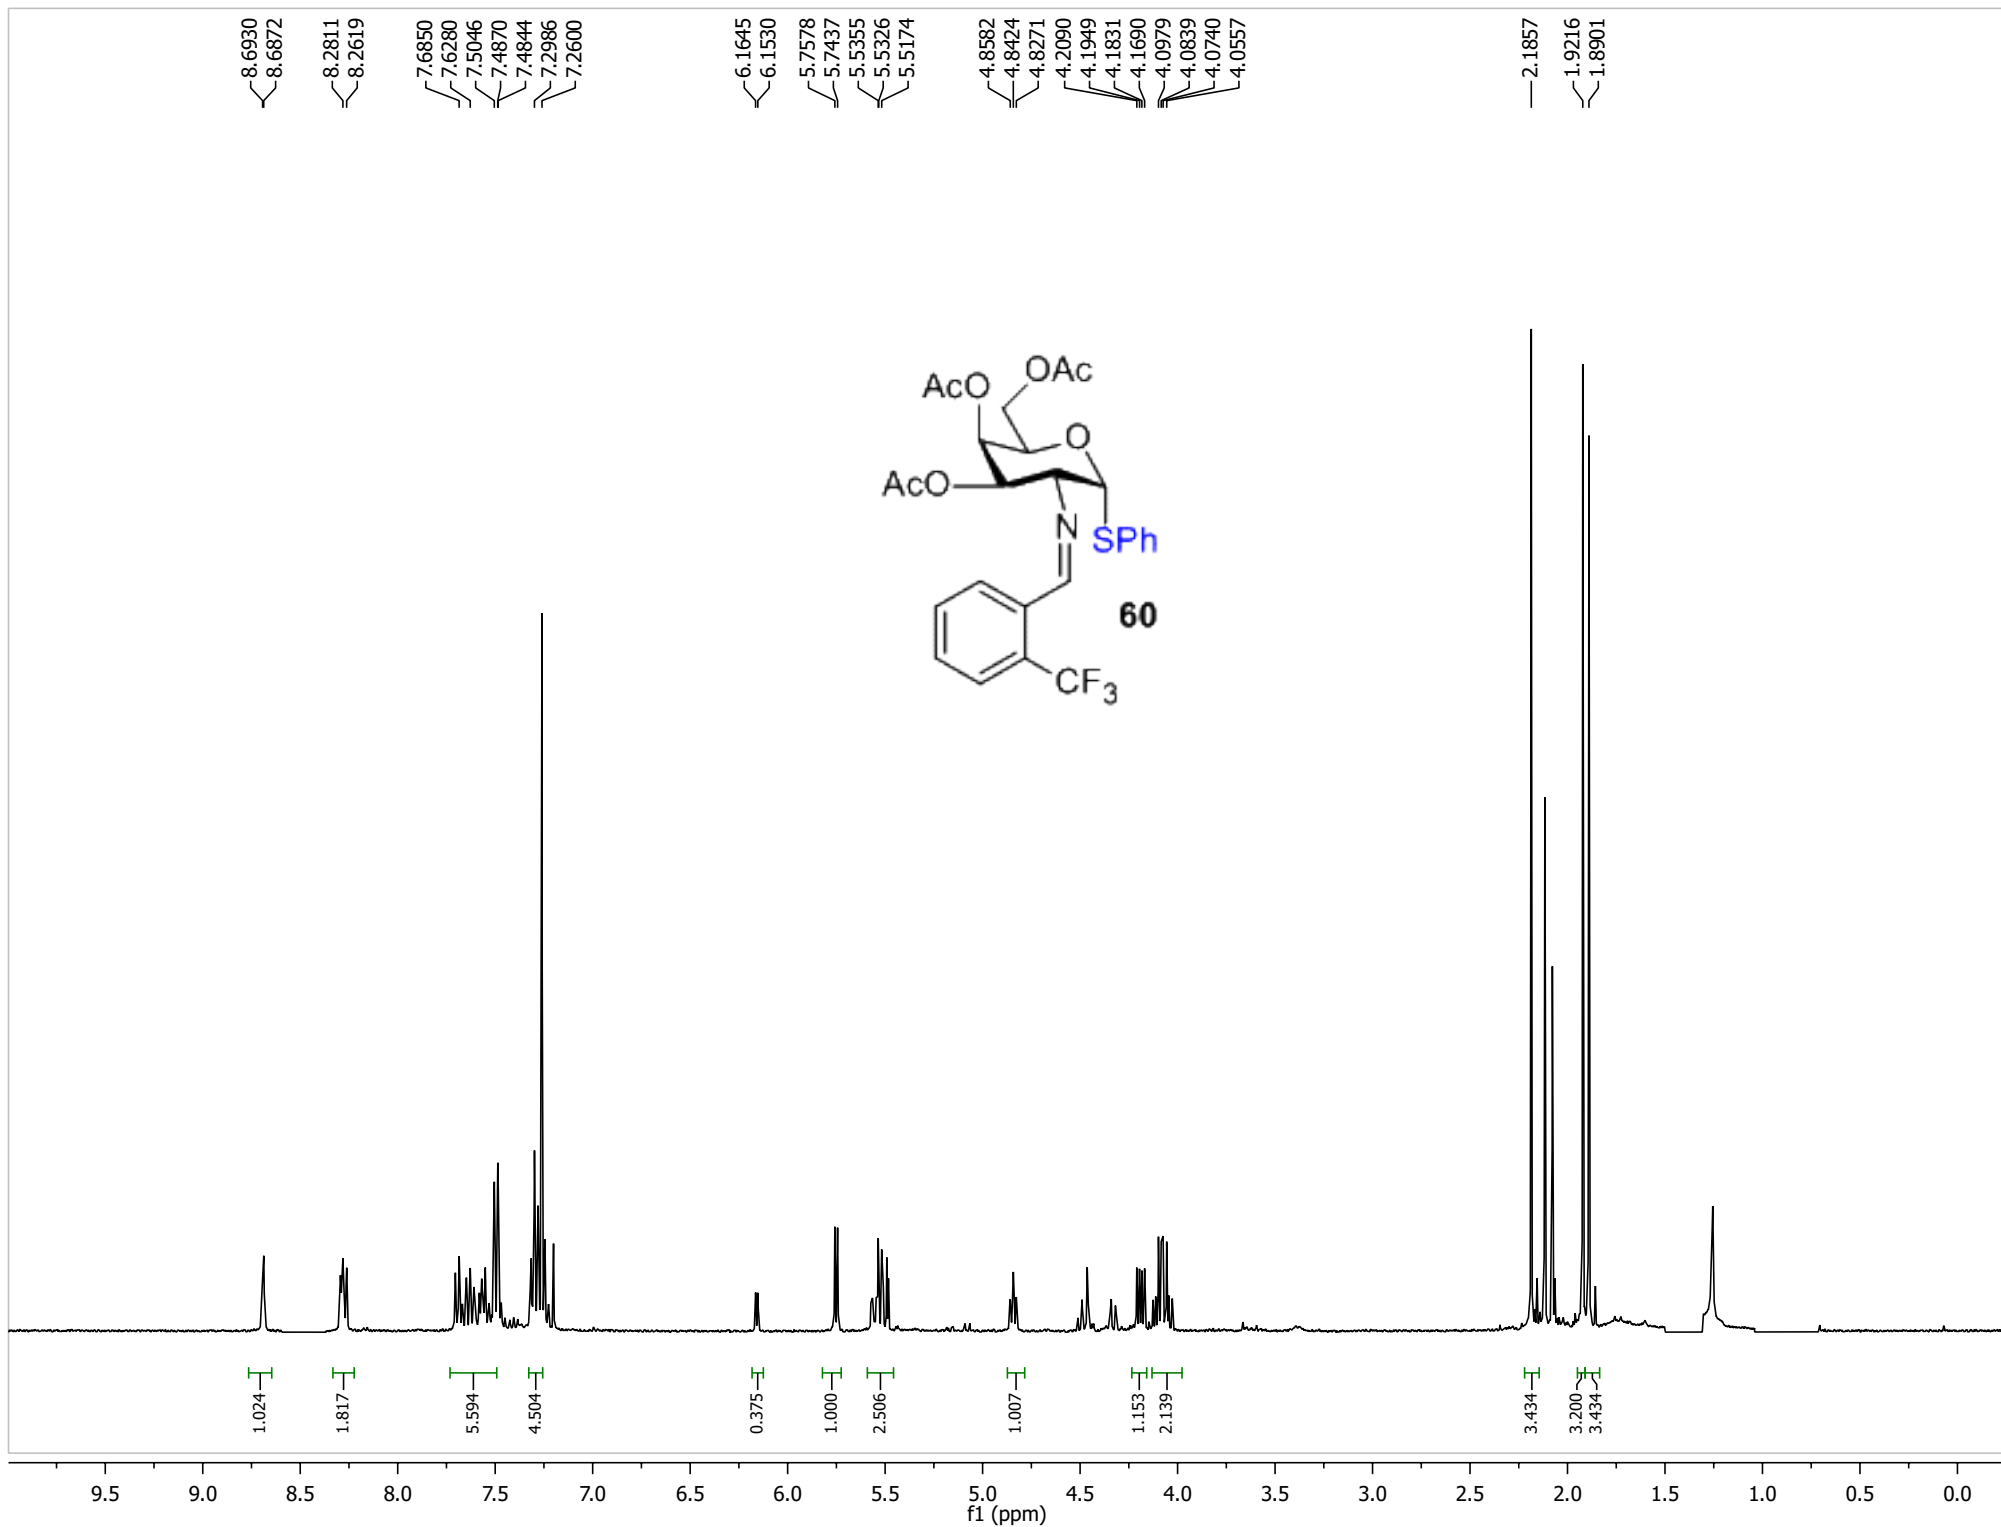

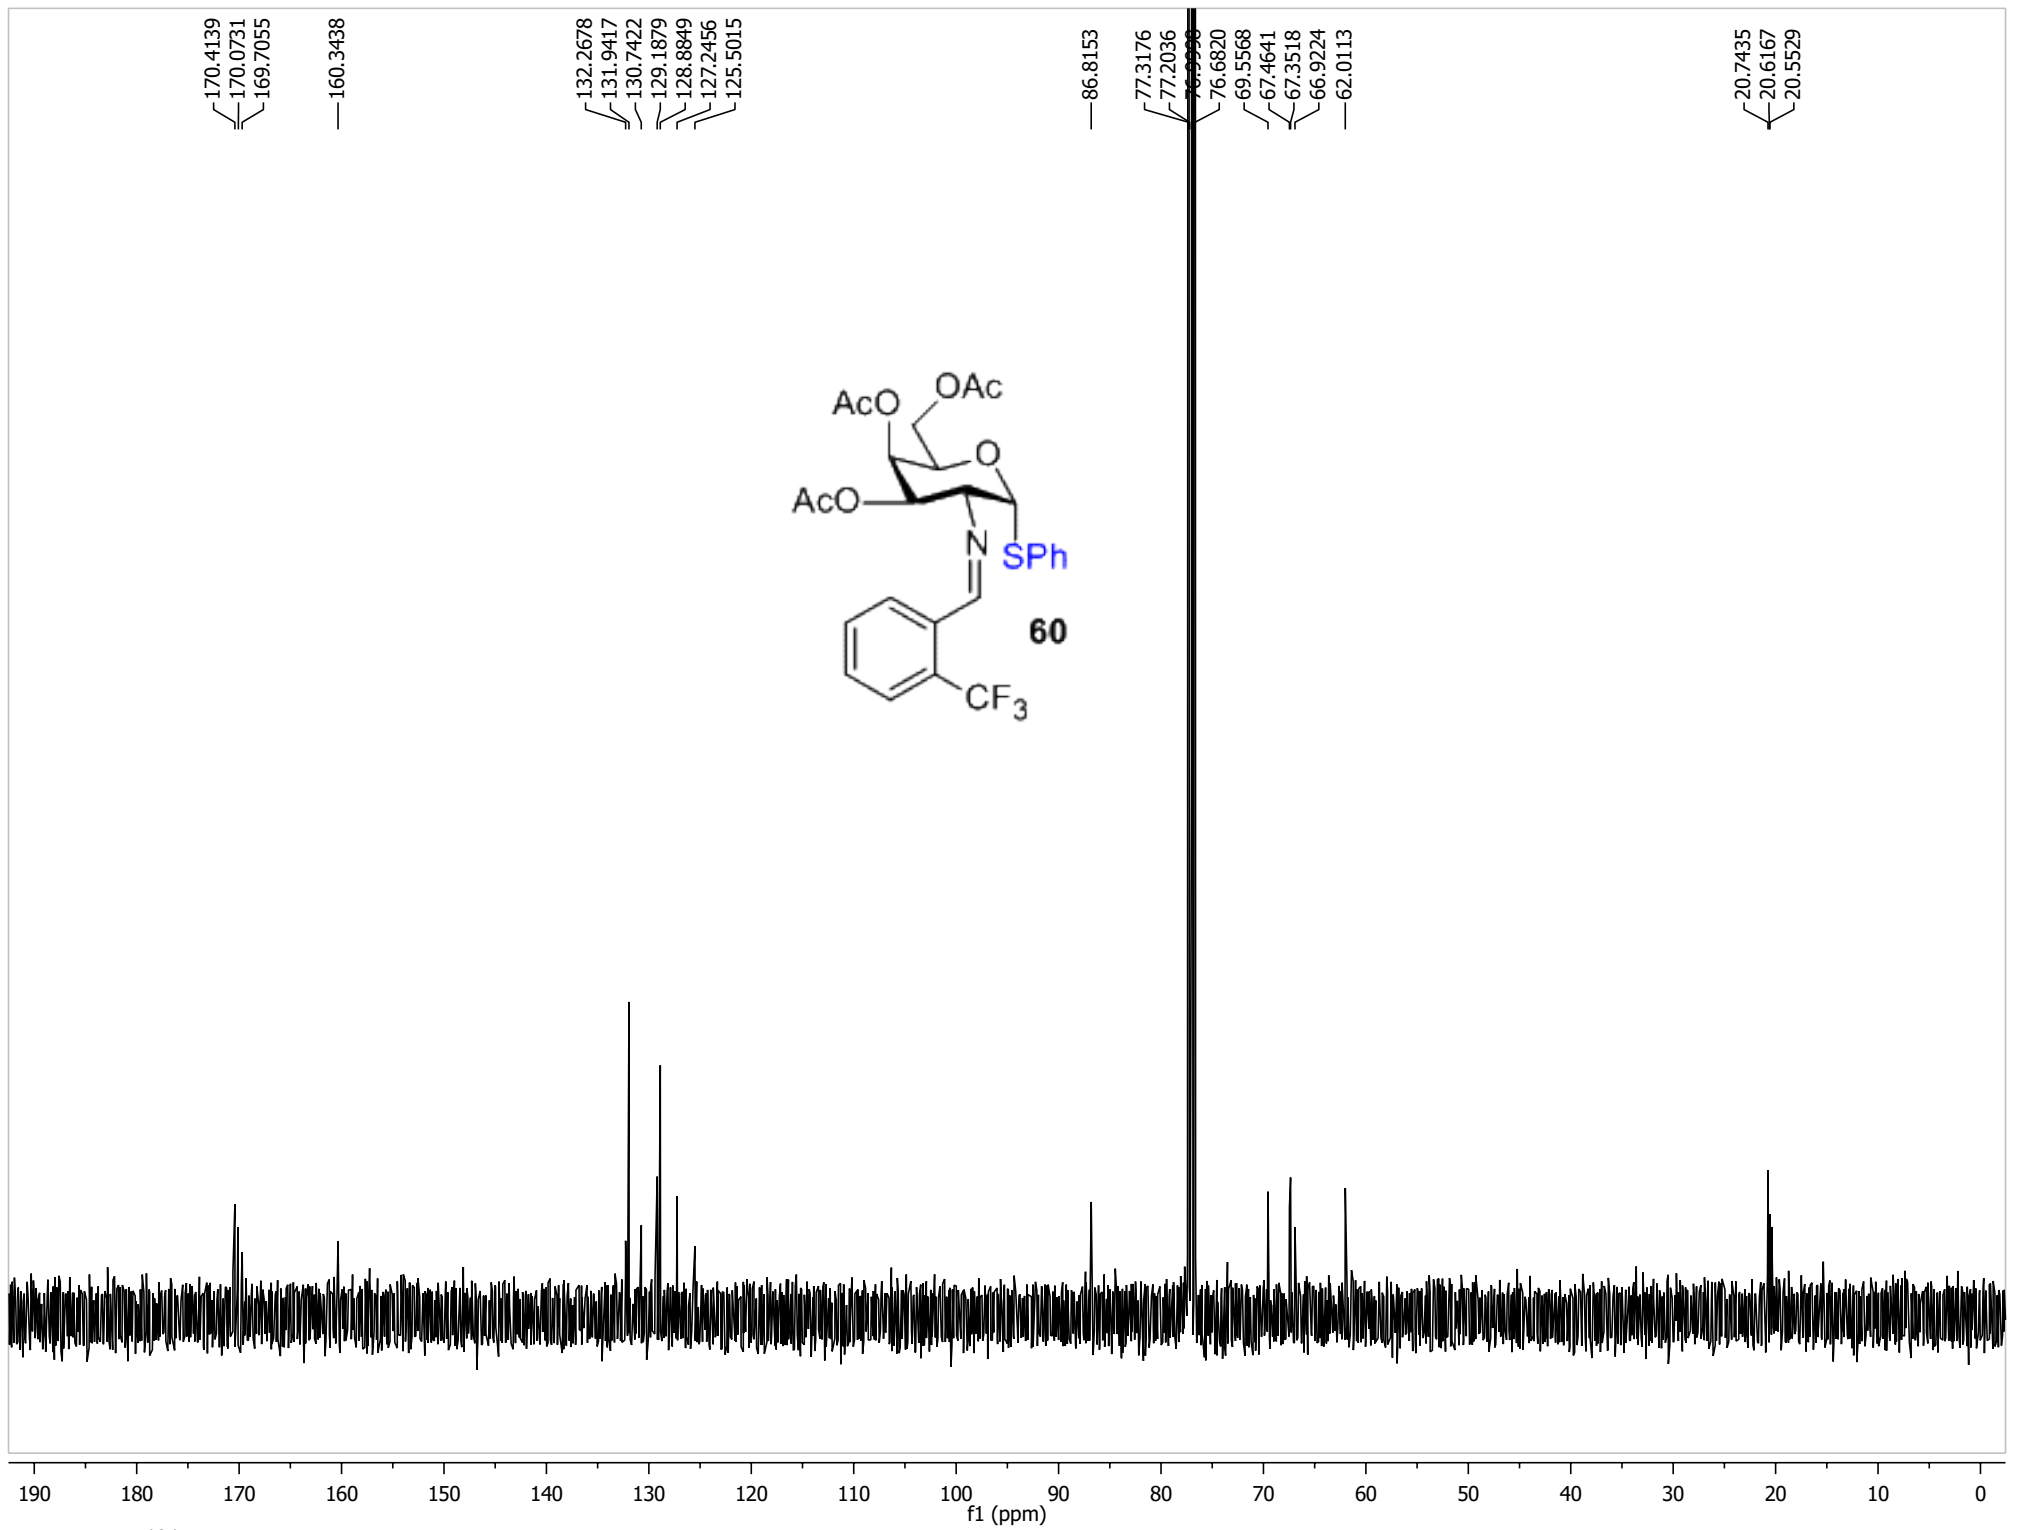

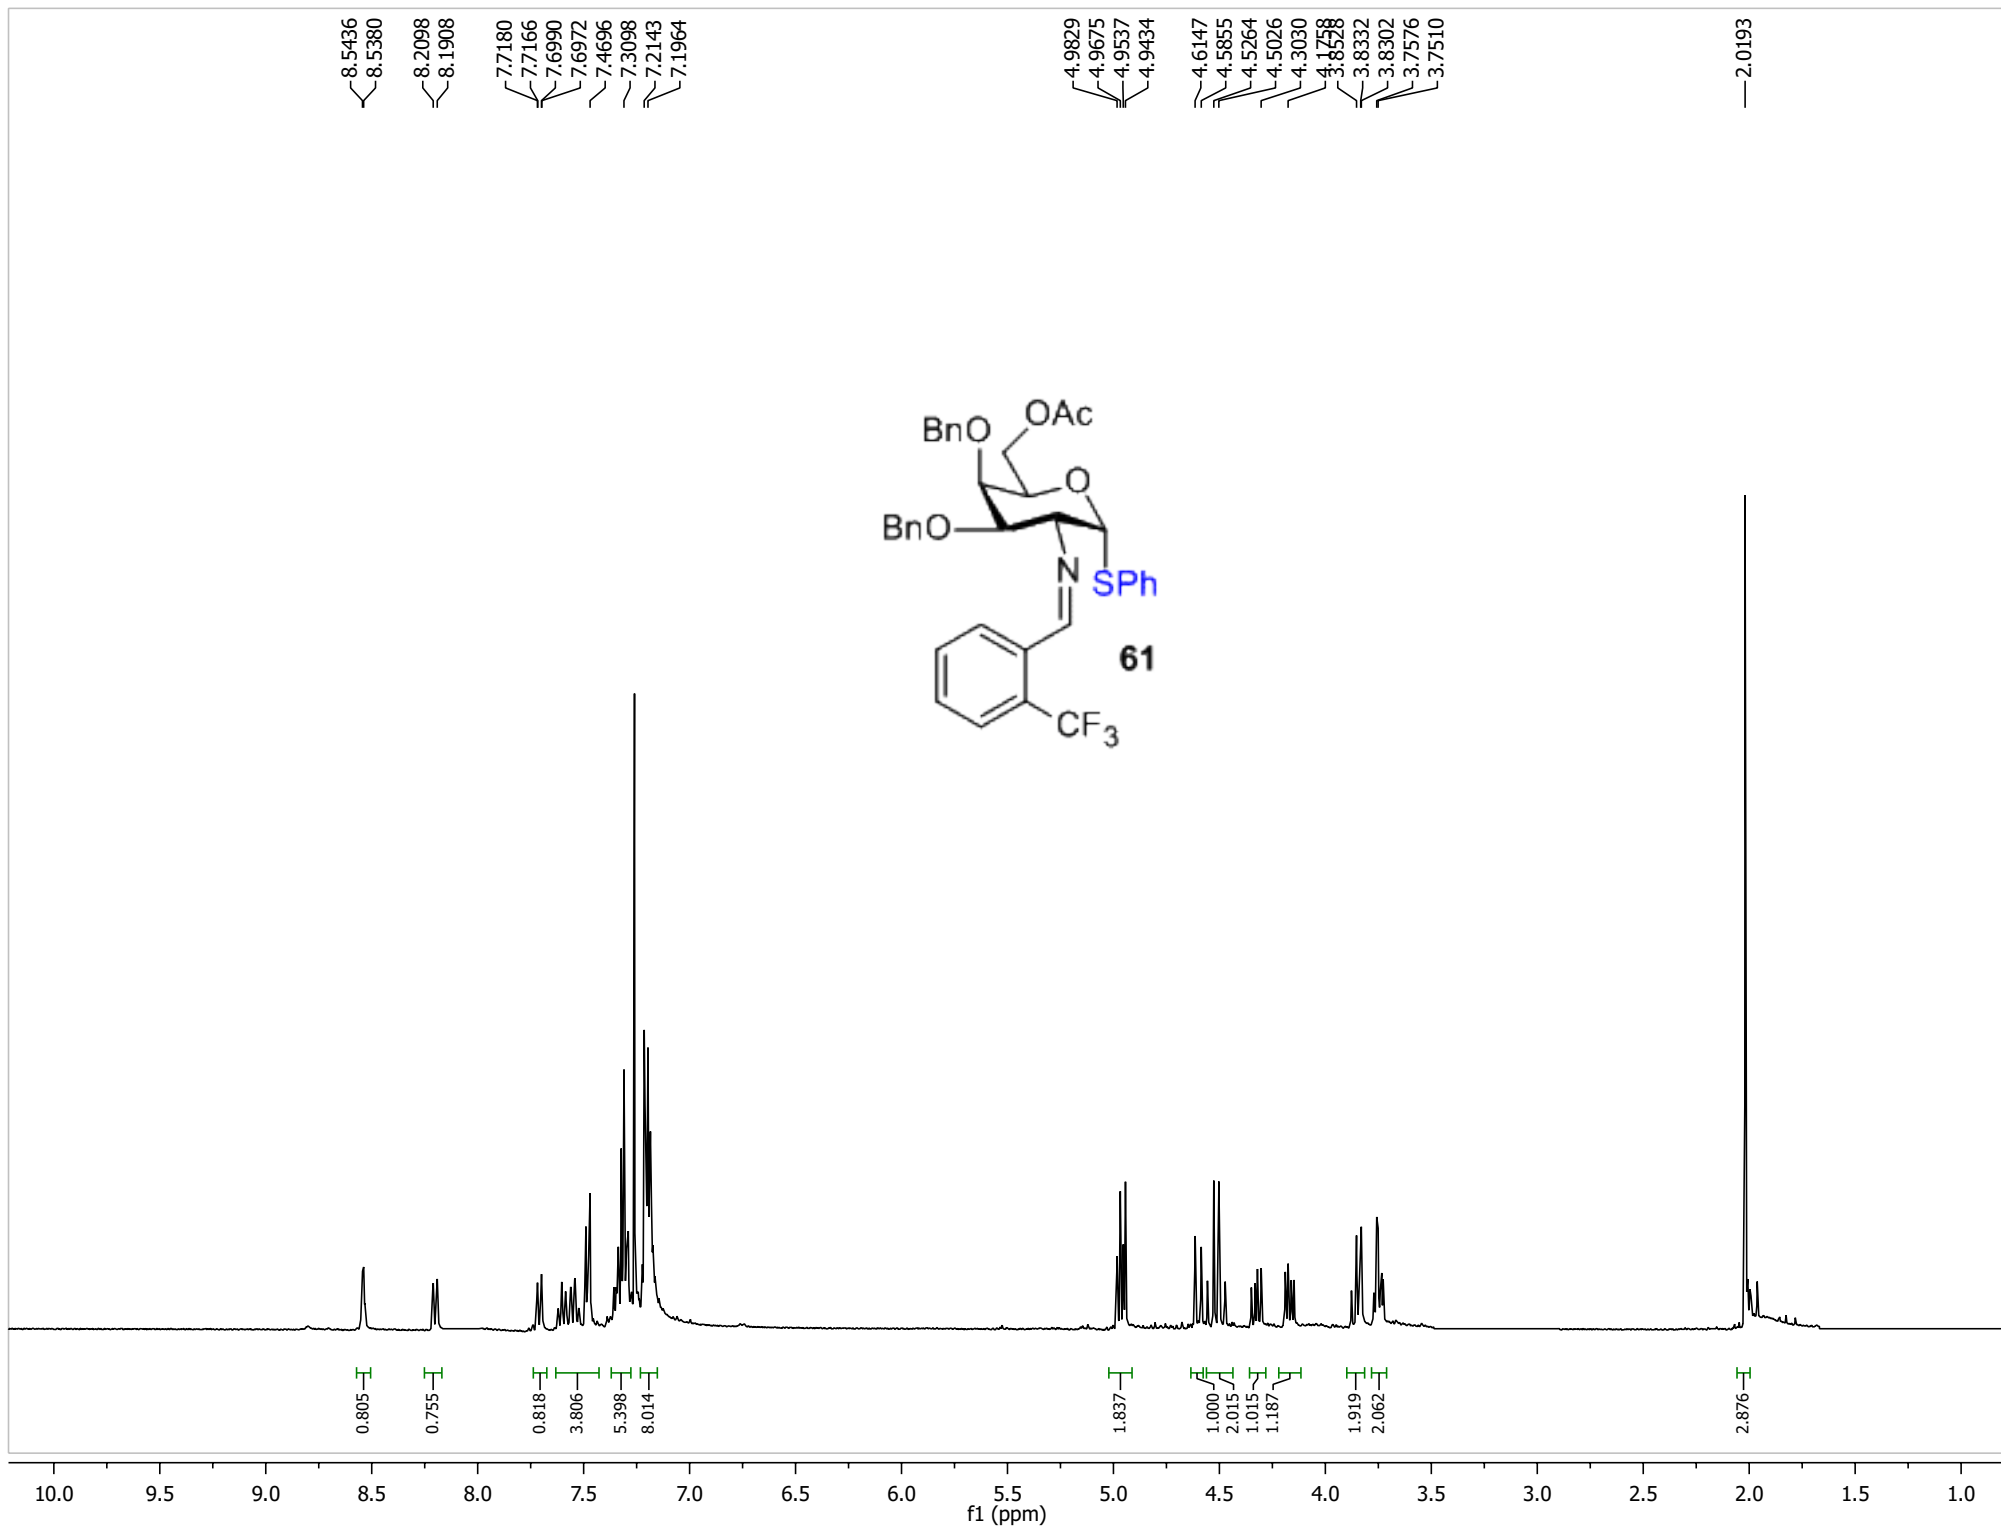

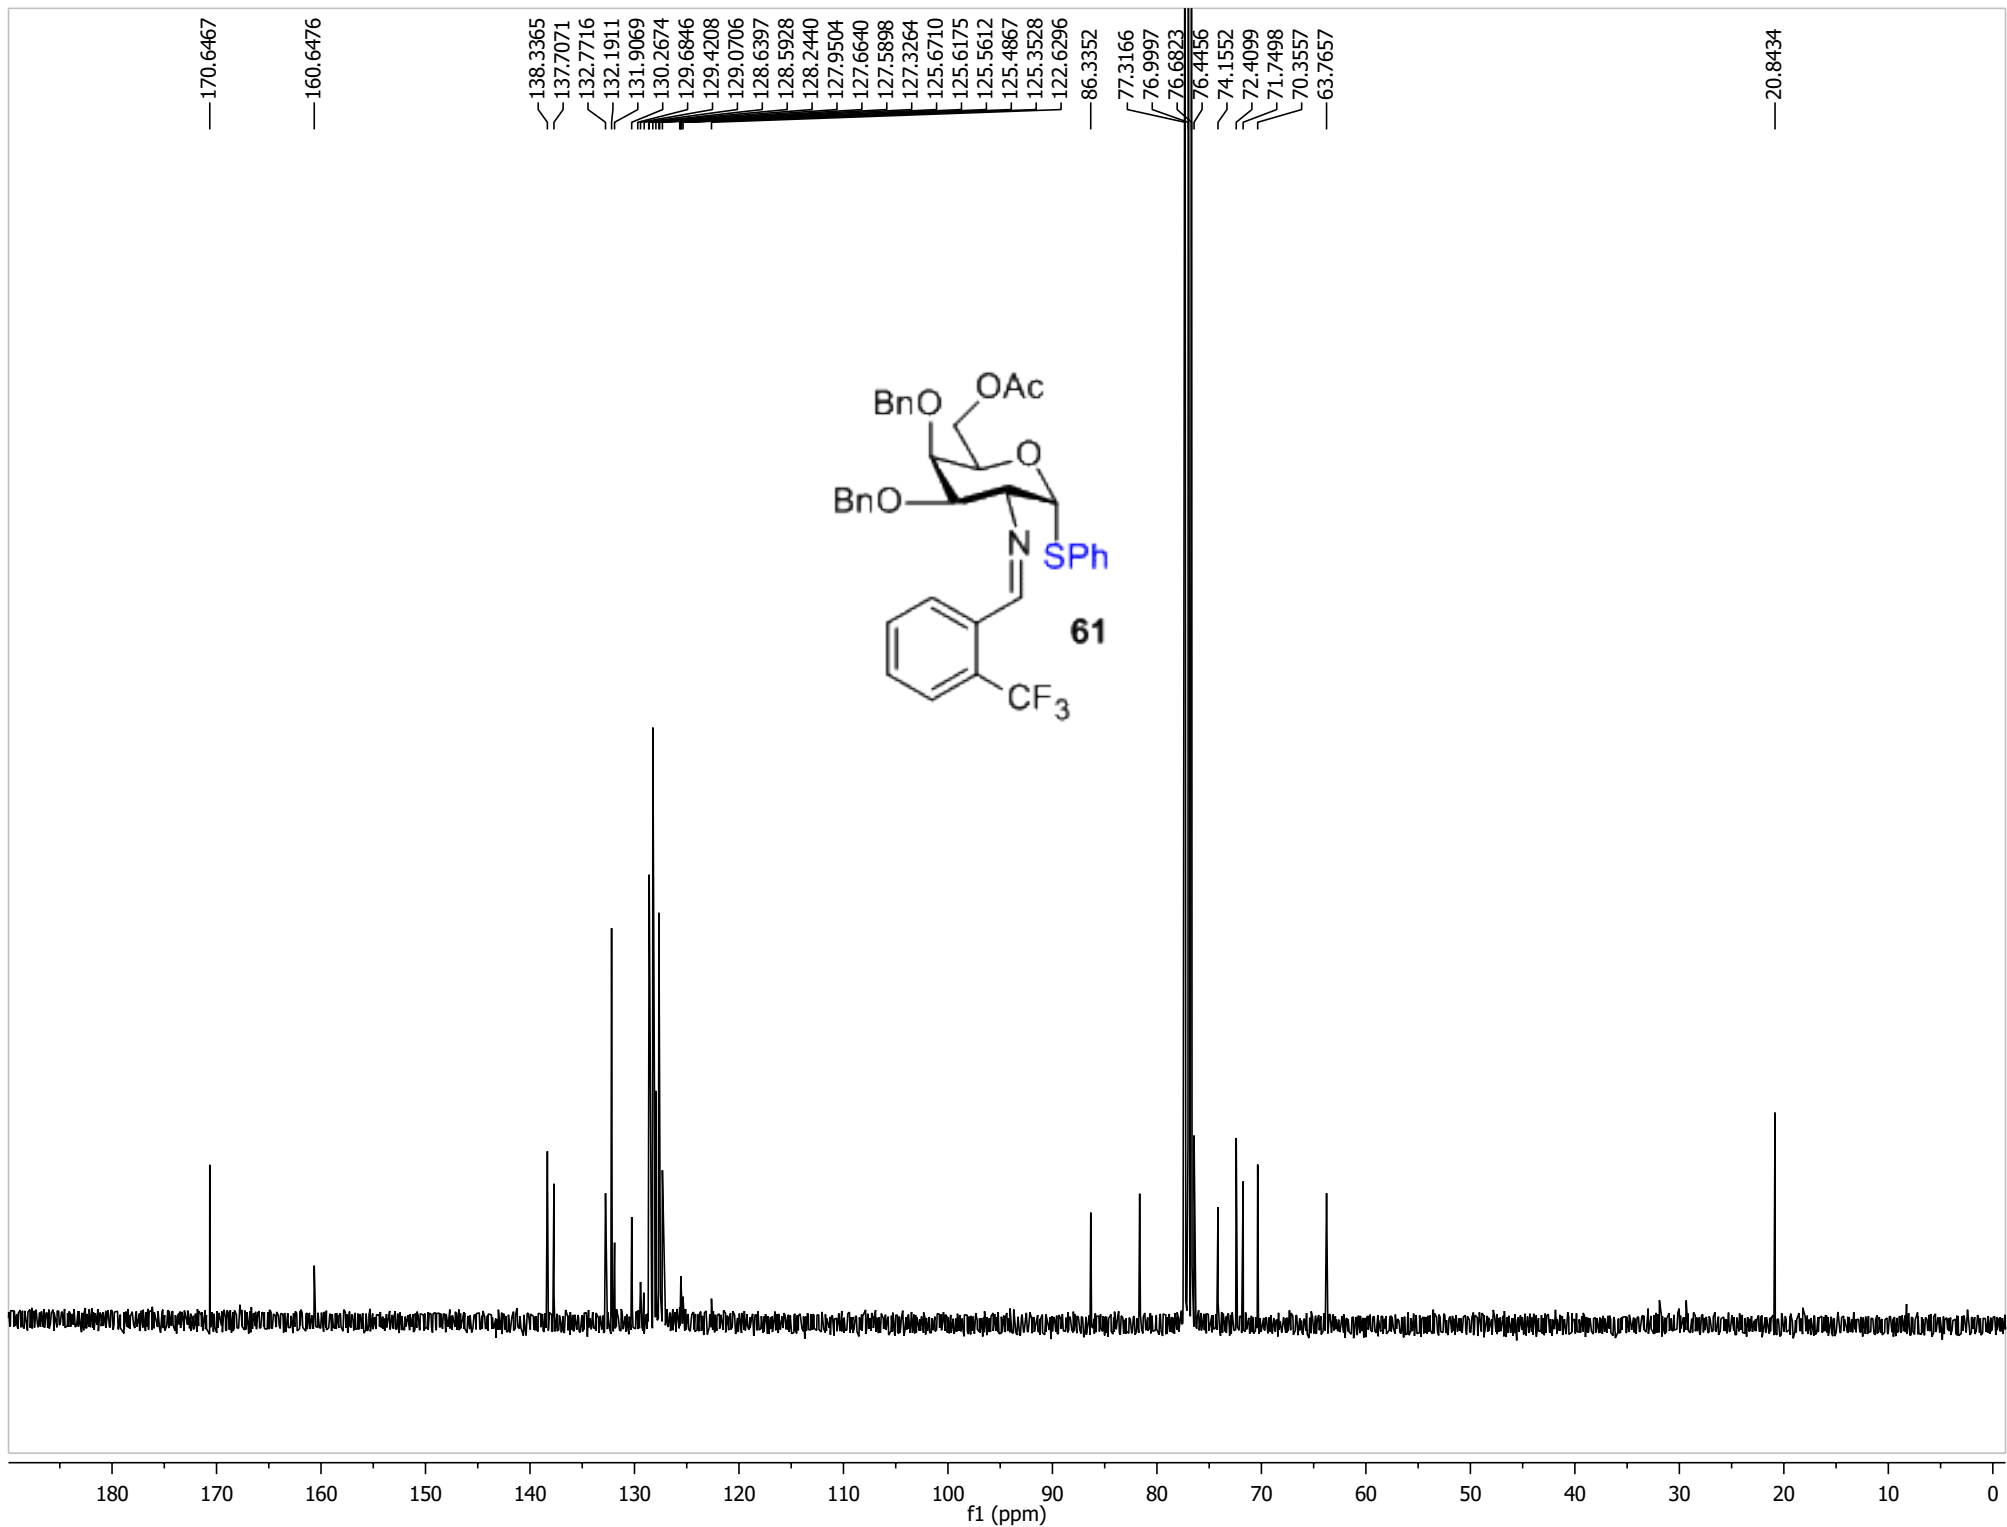

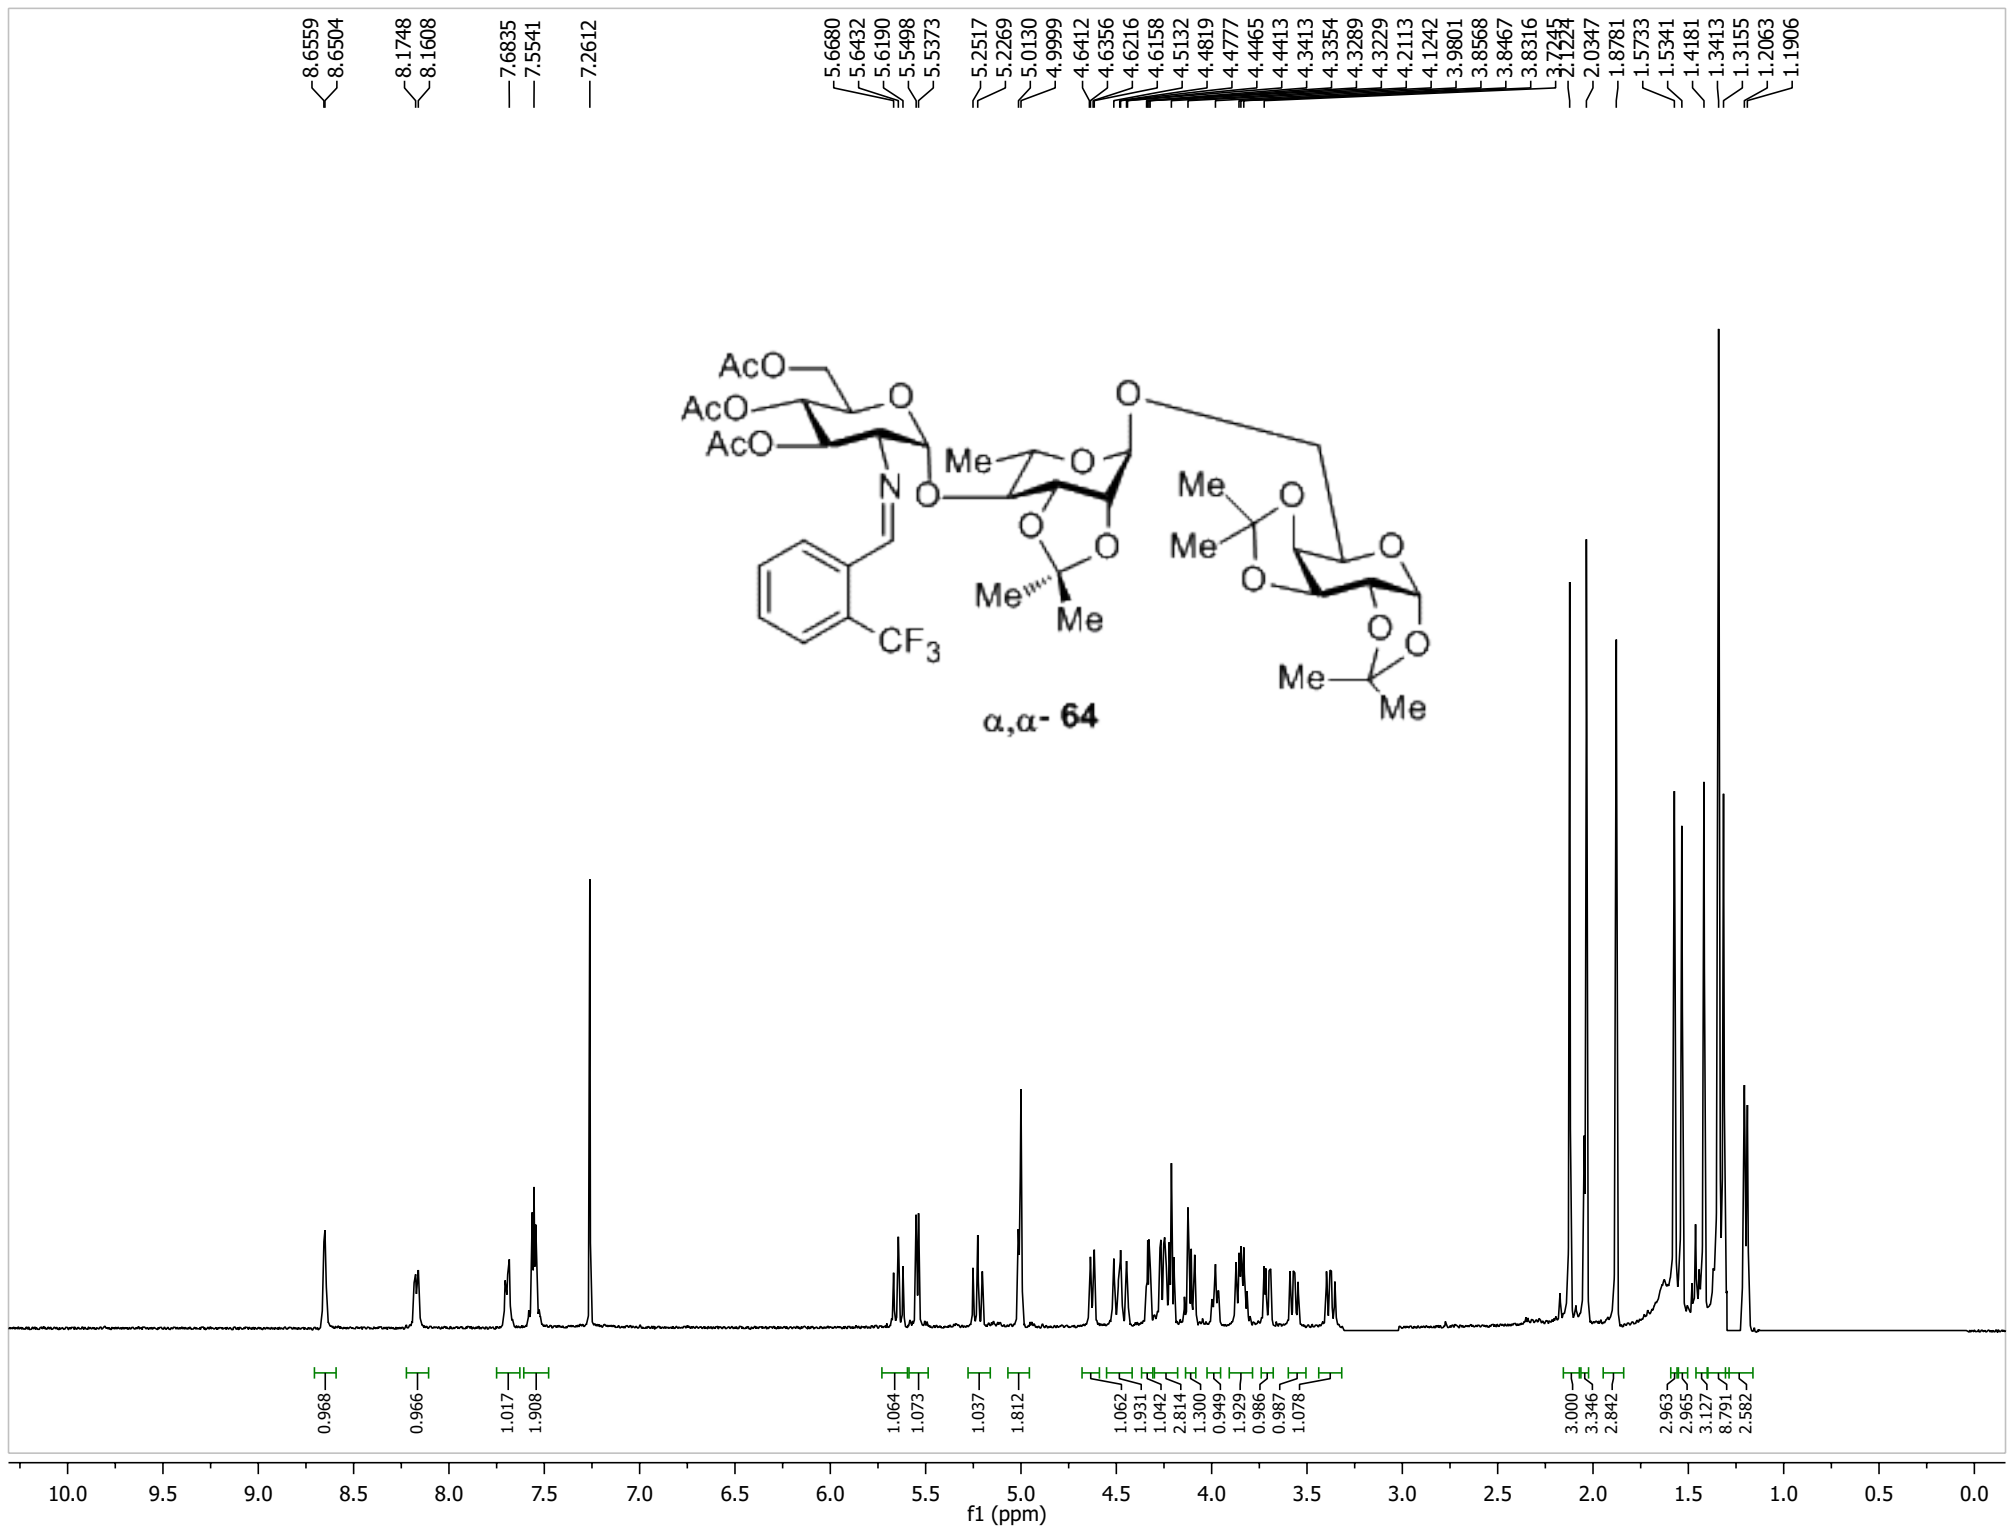



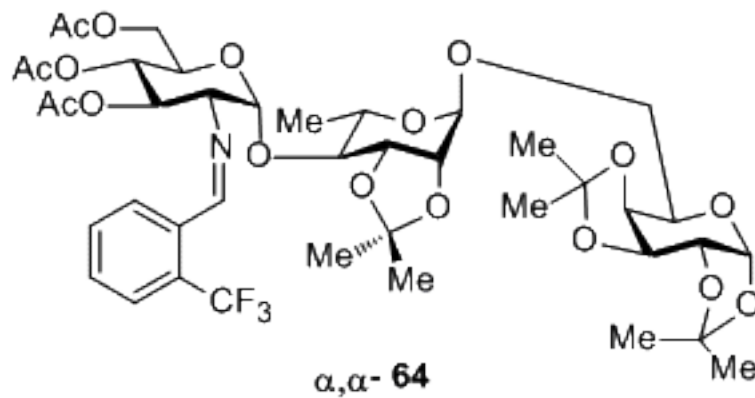

170.9350  
169.9890  
169.8985

161.1810

133.2603  
132.0131  
130.7804  
129.4599  
129.1502  
128.2185  
125.7368  
125.6800  
125.6246  
125.5670  
125.3213  
122.5972  
109.2502  
109.1387  
108.6619

99.9211  
96.8542  
96.2427

81.7669  
77.3168  
77.2023  
76.9998  
76.6827  
75.9683

71.0816  
70.8816  
70.5691  
70.4204  
68.3395  
67.6150  
66.5405  
65.7178  
64.9288  
61.5616

28.2166  
26.4177  
26.1539  
25.9625  
24.8980  
24.5259  
20.8441  
20.7499  
20.4671  
16.8519

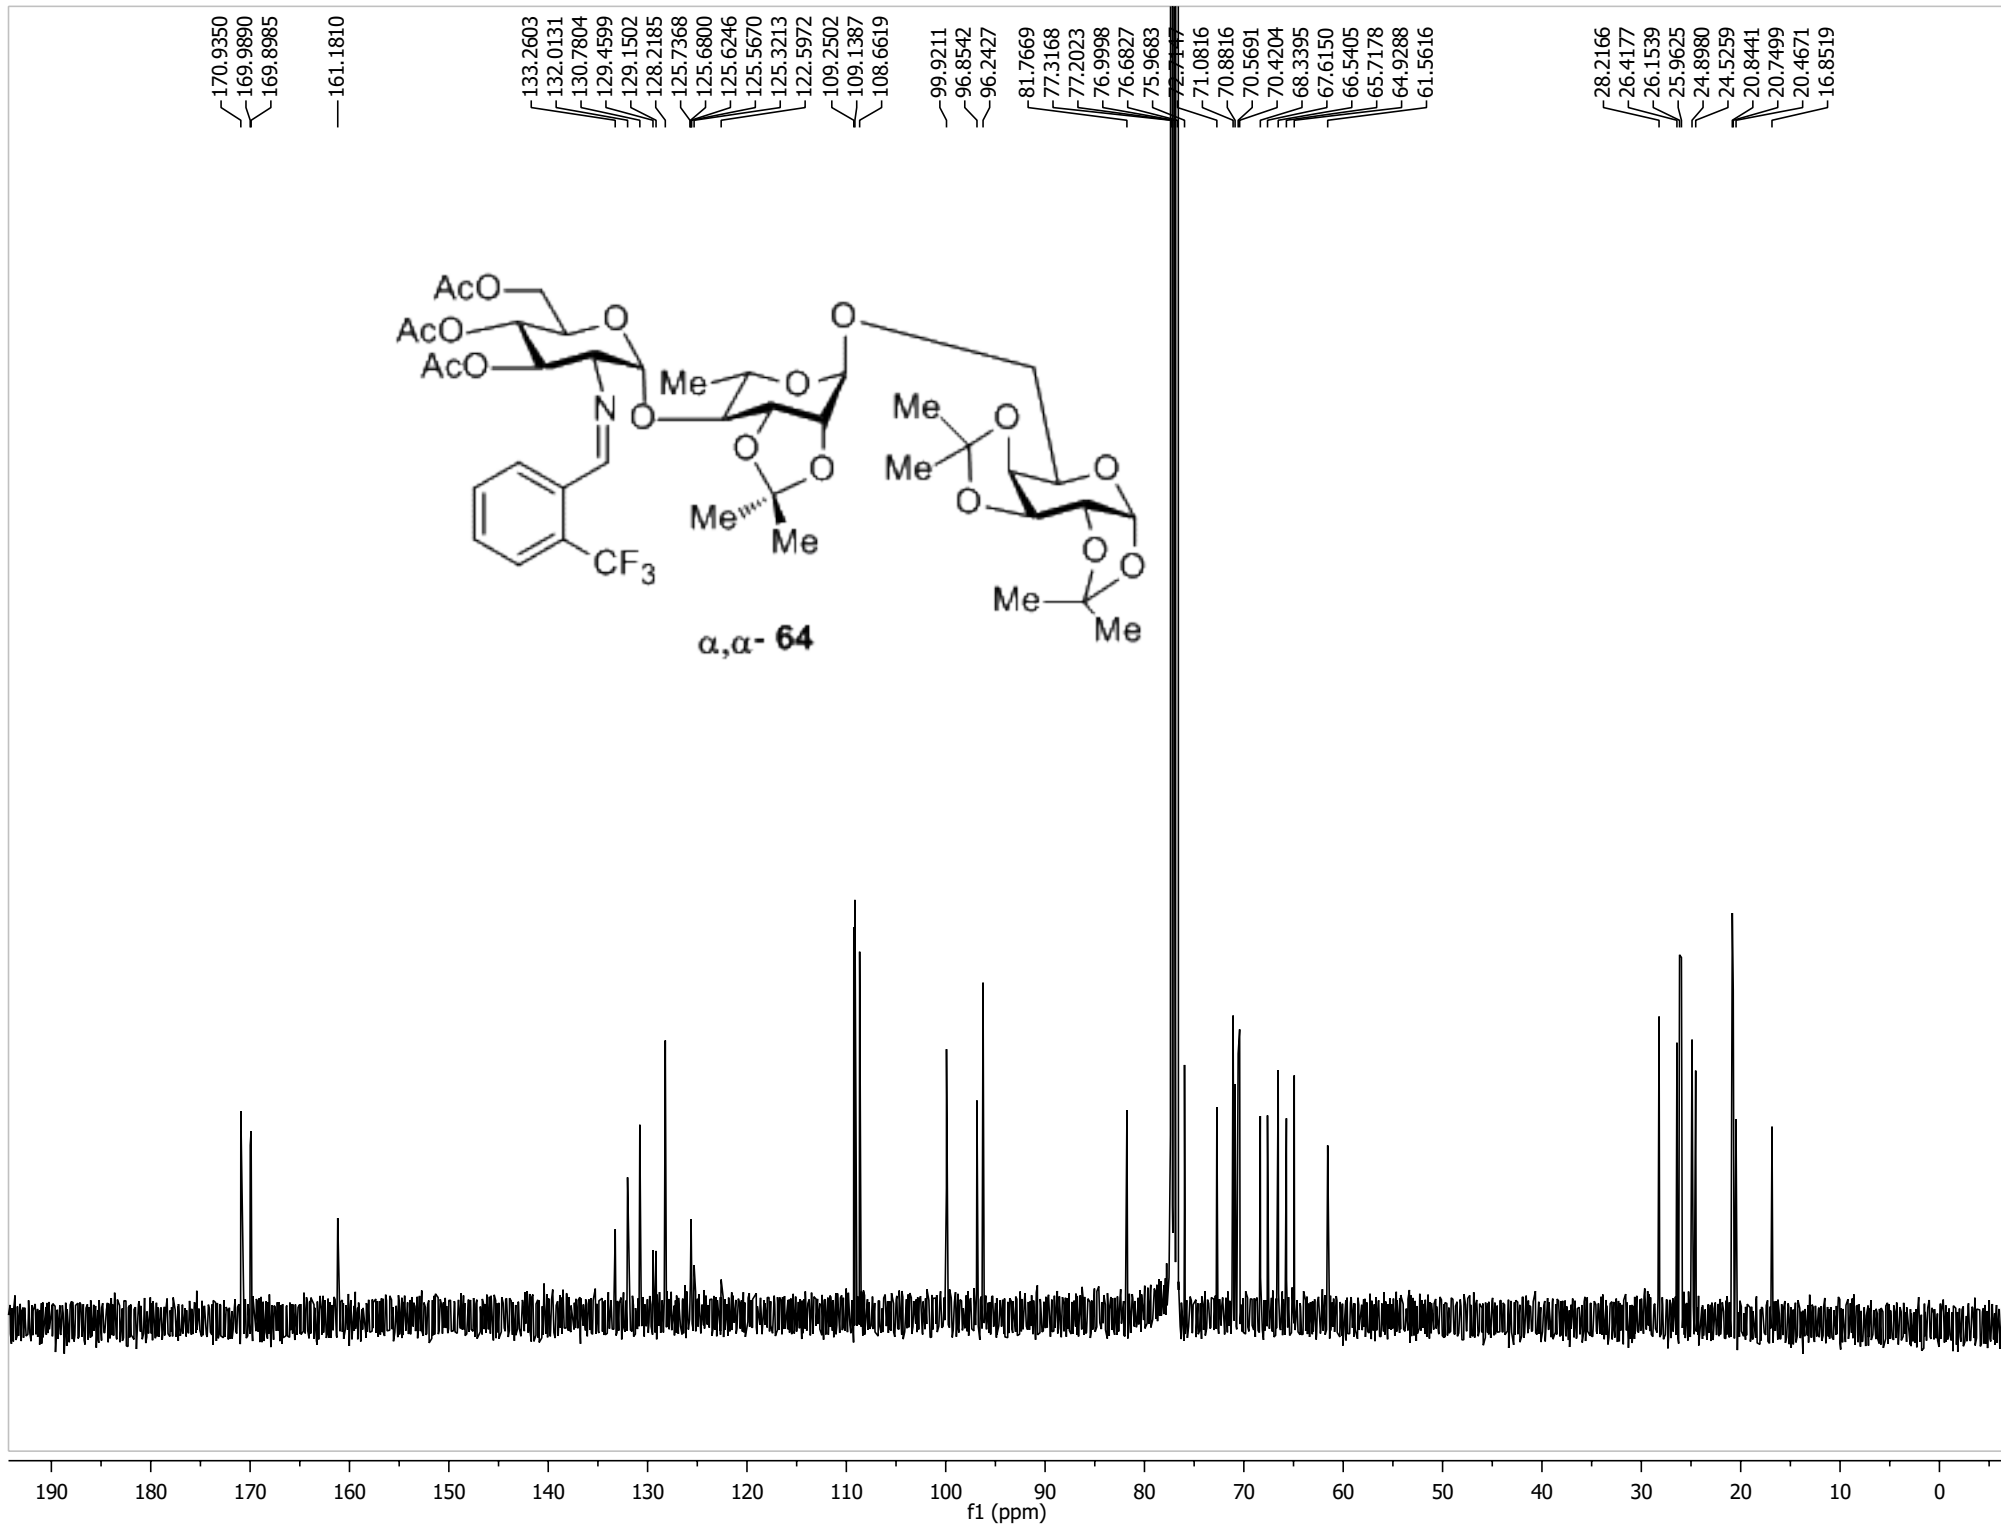

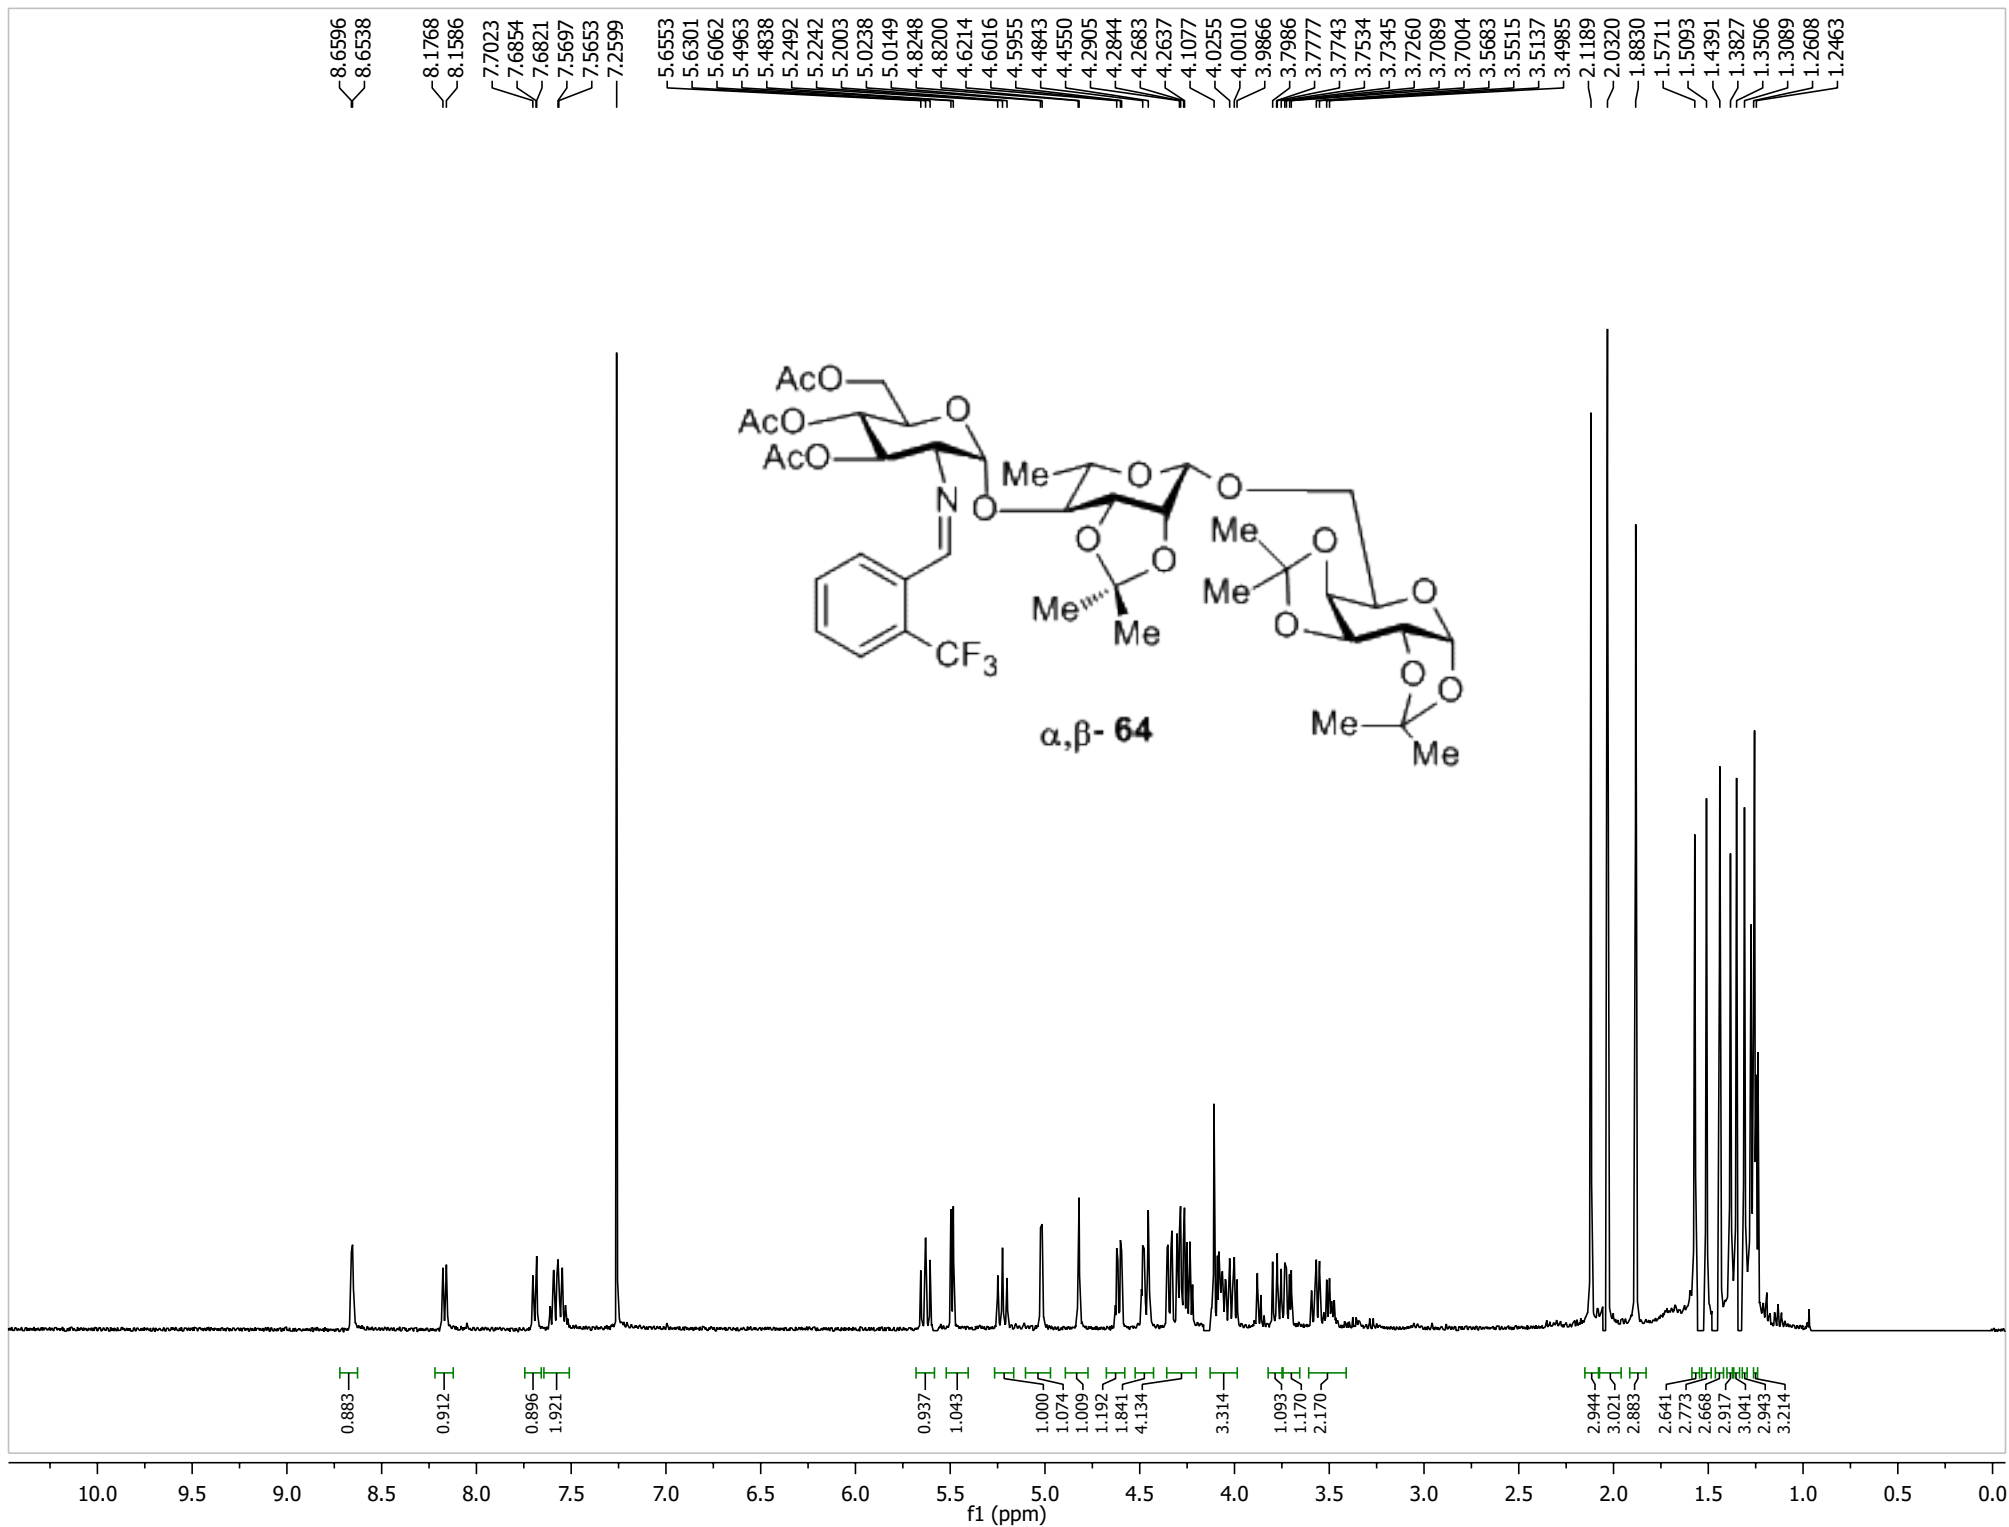

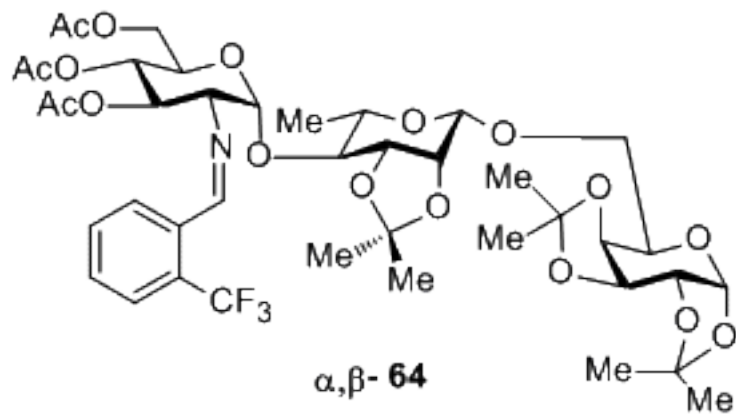

170.9175  
169.9568

161.2947

130.8393  
128.2773

110.6611  
109.0700  
108.5521

99.8537  
98.8098  
96.2046

81.5252  
77.3175  
77.2038  
77.0000  
76.6827  
74.5847

74.5976  
70.8592  
70.7242  
70.6534  
70.4859  
70.4385  
68.3770  
67.8202  
67.7330  
65.4559  
61.5642

28.0379  
26.4689  
26.0660  
25.9879  
24.8188  
24.4756  
20.8391  
20.7425  
20.4521  
17.6068

190 180 170 160 150 140 130 120 110 100 90 80 70 60 50 40 30 20 10 0

f1 (ppm)

spect, CDCl<sub>3</sub>

8.4391  
8.4335  
8.2533  
8.2346

7.6248  
7.5422  
7.5235

7.1981  
7.1931  
7.1765  
7.1748  
7.1058  
7.0864  
7.0678  
6.9352  
6.9165

5.6311  
5.5961  
5.5713  
5.5336  
5.5213  
5.3673  
5.1821  
5.1291  
5.1114  
5.1043  
5.0803

4.8149  
4.6251  
4.6192  
4.6055  
4.5995  
4.5193  
4.3320  
4.3256  
4.3195  
4.2288  
4.2248  
4.2084  
4.2049  
4.0103  
4.0001  
3.9983  
3.8002  
3.7418  
3.6485  
3.6392  
3.6230  
3.5552  
3.5170  
2.1368  
2.0345  
1.8378

1.5768  
1.4604  
1.3497  
1.3420

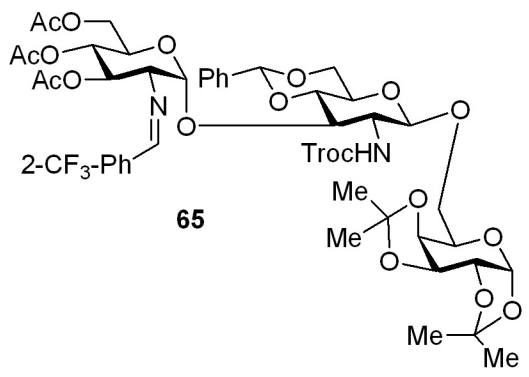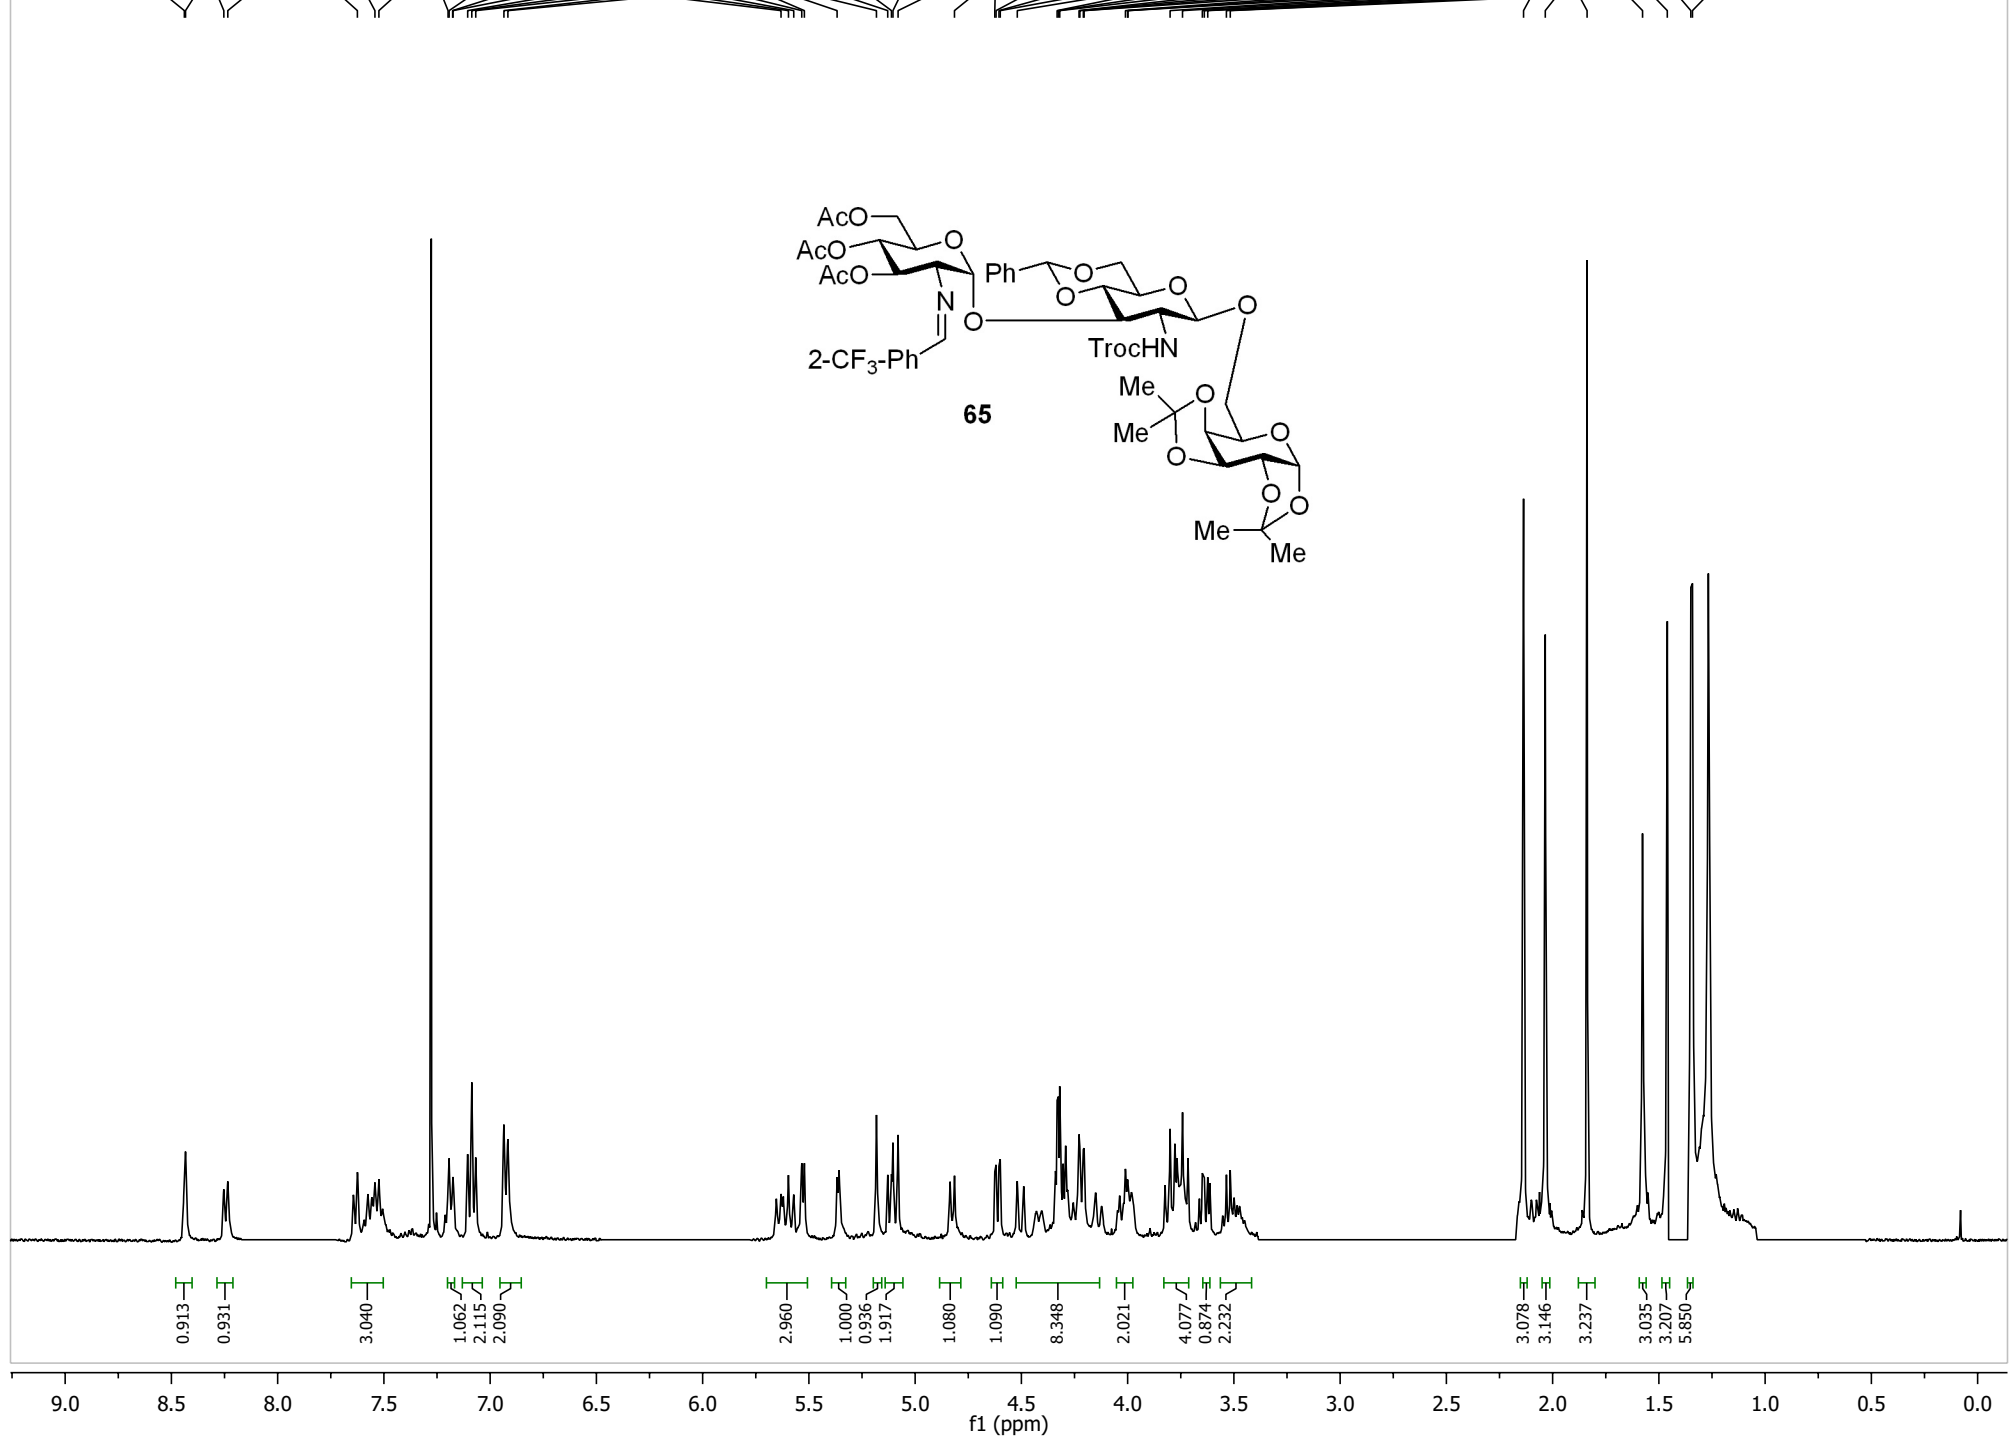

spect, CDCl<sub>3</sub>,

170.7330  
169.8800  
169.6327

160.3116

136.3598  
133.2423  
131.8624  
130.6988  
129.0039  
128.9004  
128.3219  
127.9372  
125.4790

109.3753  
108.6362  
102.0876  
101.5373  
99.1226  
96.1838  
95.3730

82.3104  
77.3192  
77.2059

77.0015  
76.6840  
75.4792  
74.6324  
72.3095  
71.1342  
70.7732  
70.5882  
70.2734  
68.9309  
68.5757  
67.7545  
65.8015  
62.2555  
58.3028  
56.5273

26.1555  
25.0170  
24.3206  
22.6865  
20.8565  
20.7618  
20.3869

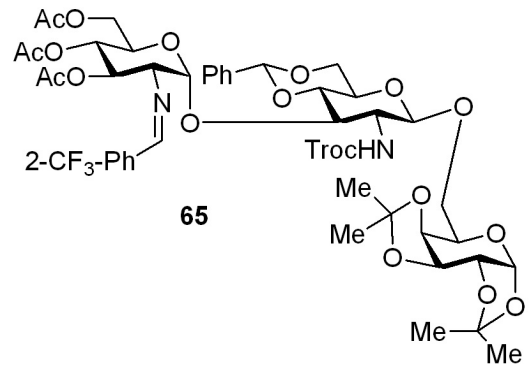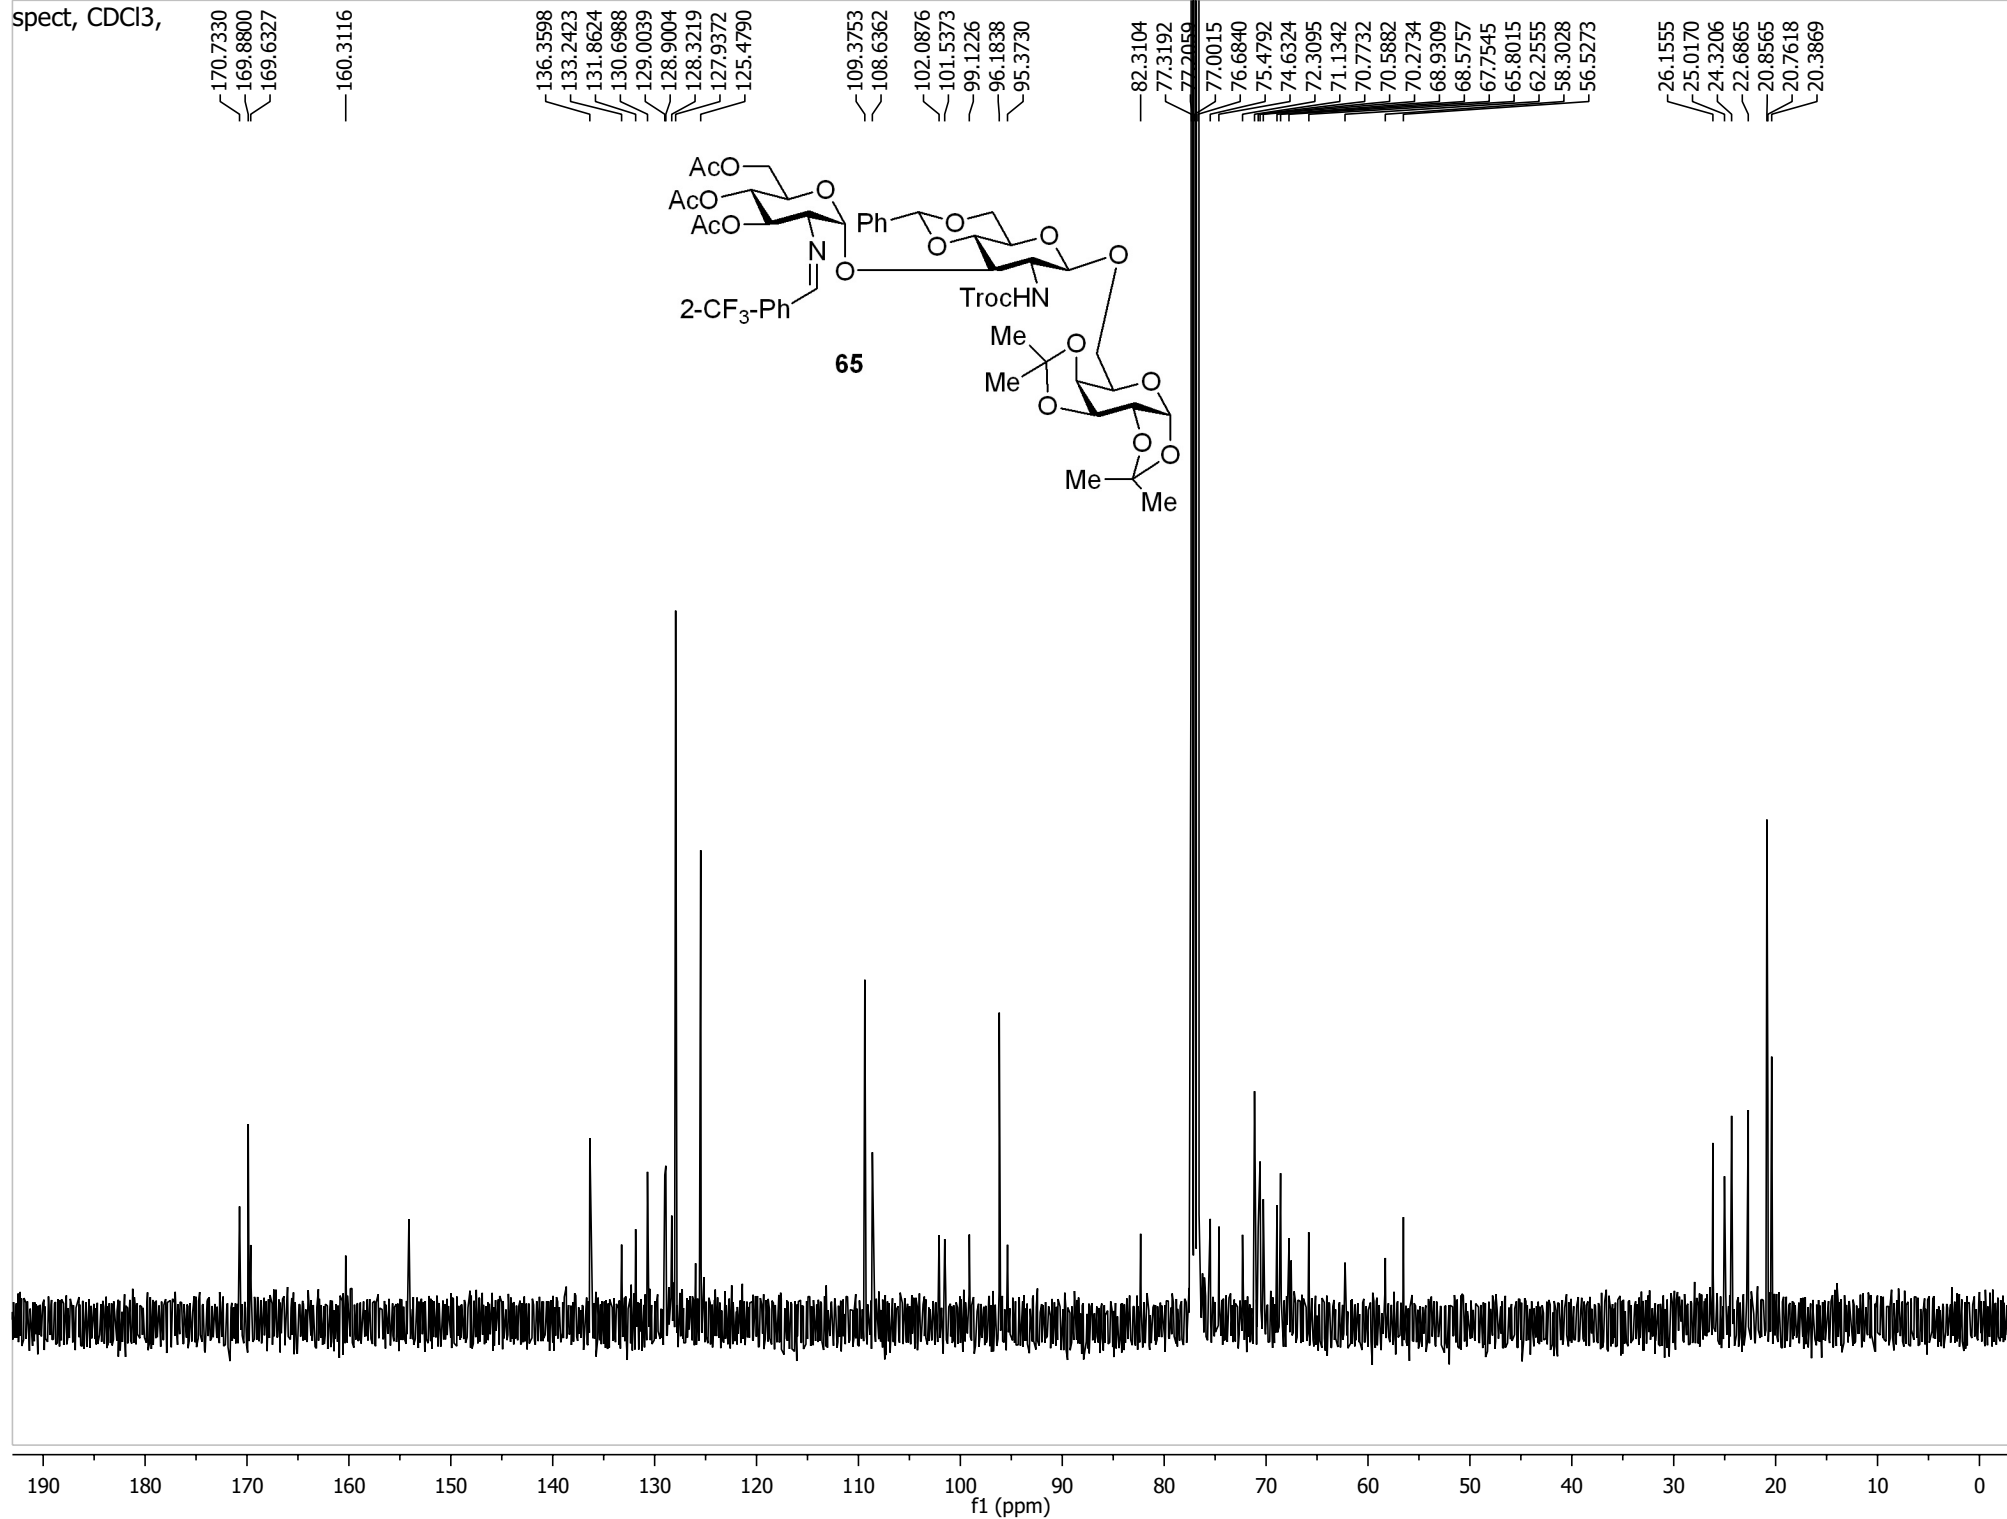

spect, CDCl<sub>3</sub>

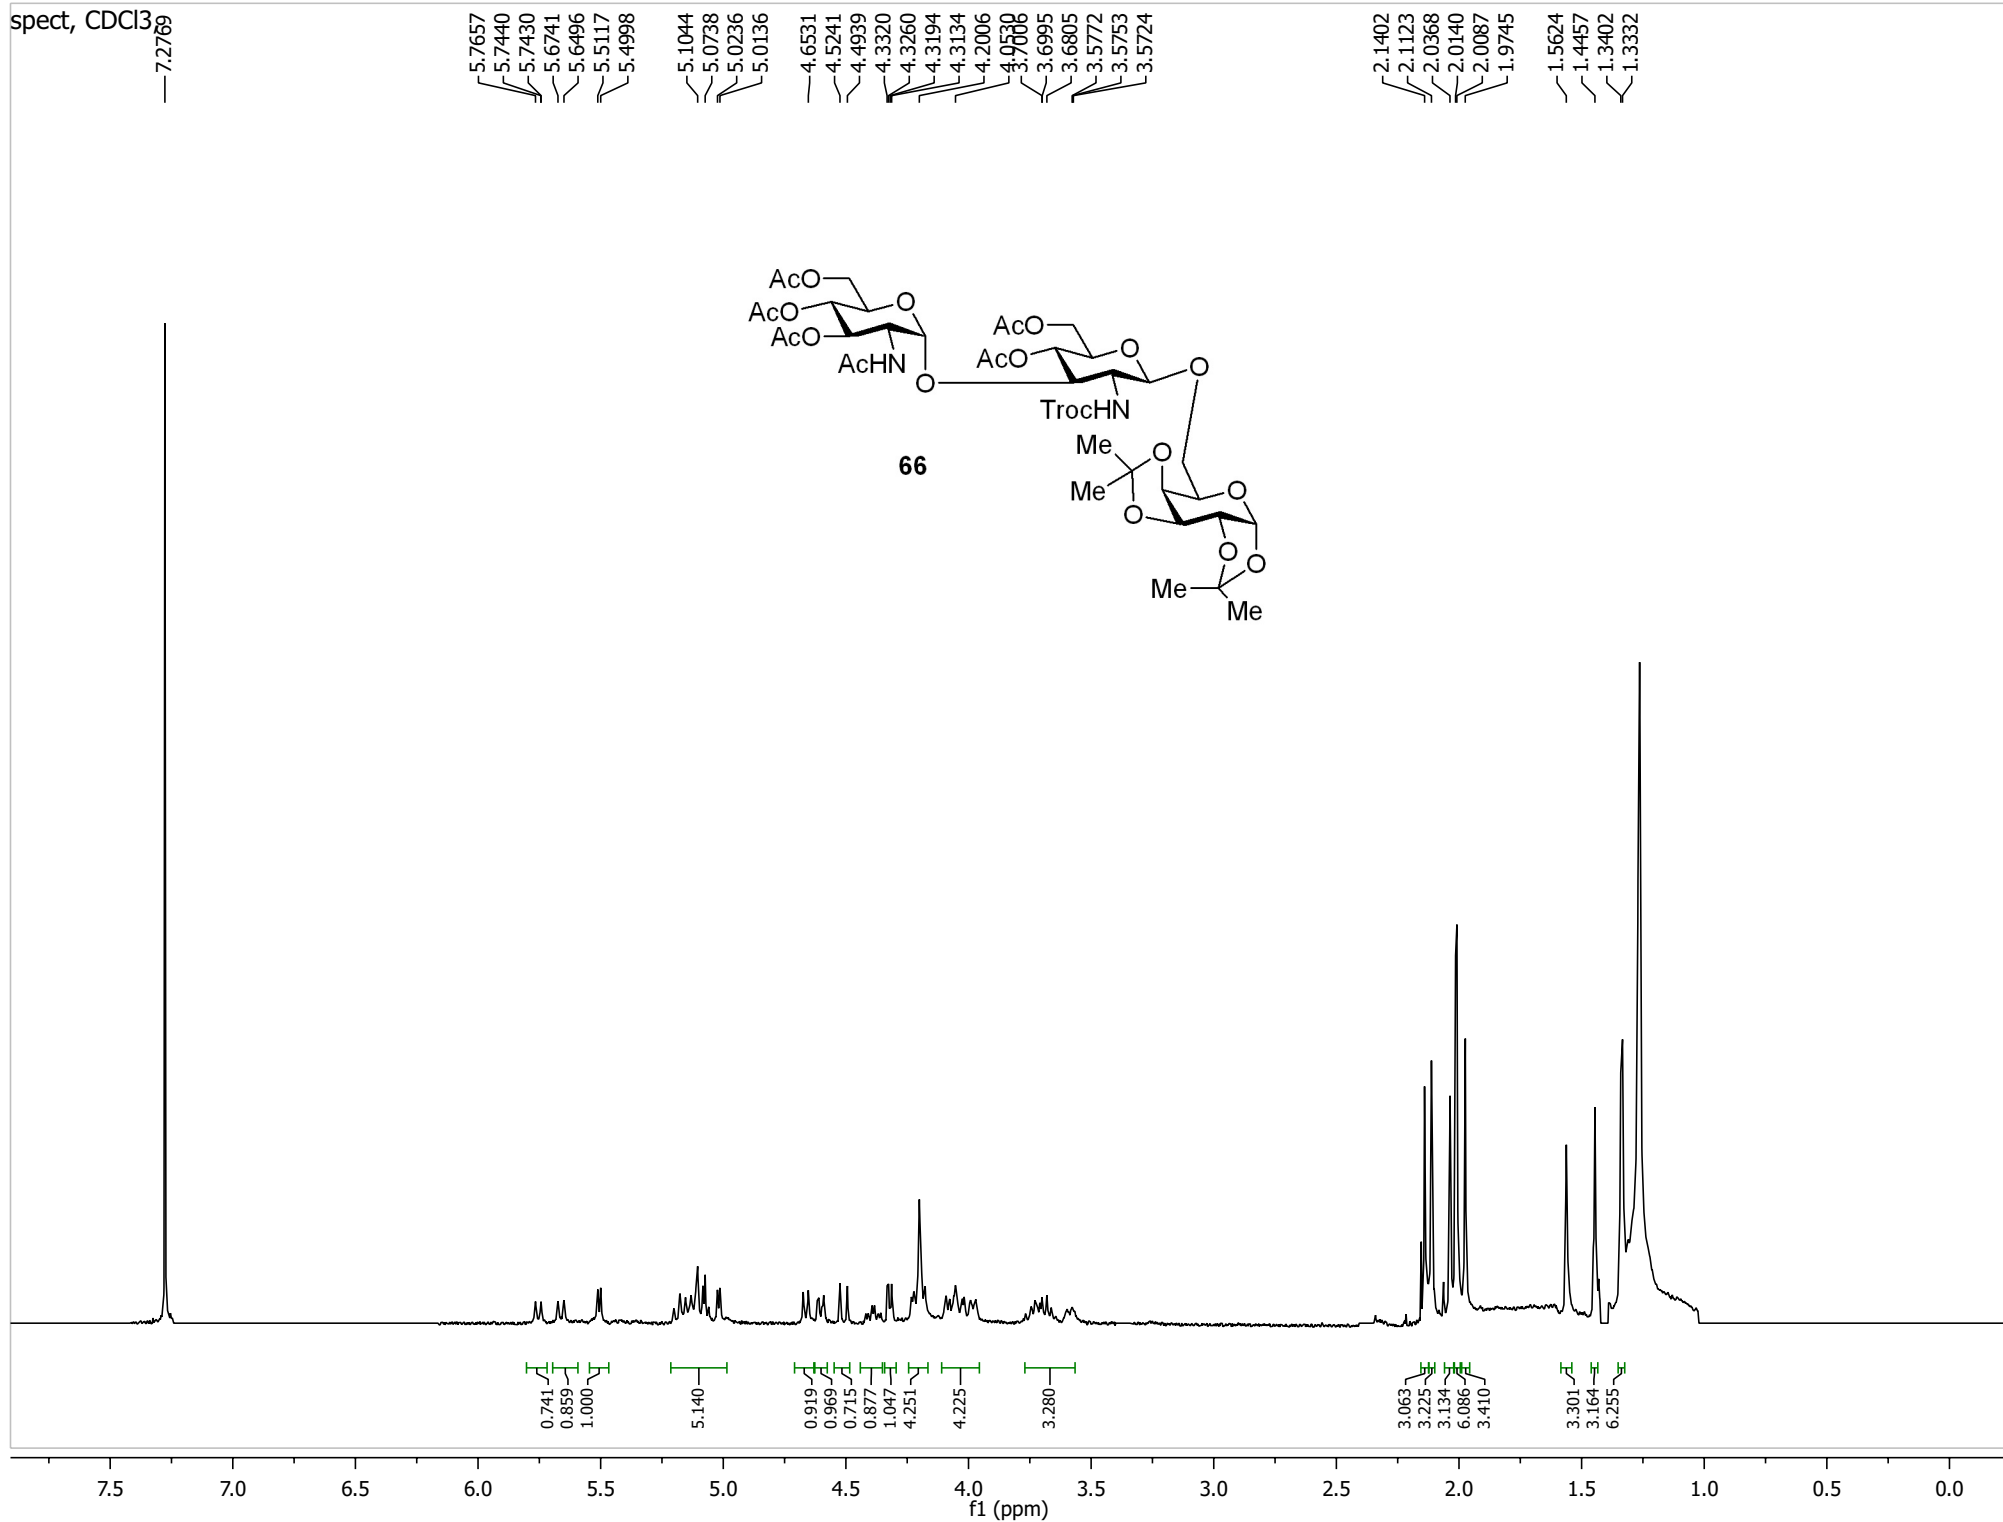

spect, CDCl<sub>3</sub>,

171.0168  
170.7636  
170.5637

109.4186  
108.6989

98.3705  
96.1357  
95.3063

77.3196  
77.2061  
77.0021  
76.6850  
74.7189  
71.6432

71.2048  
71.0754  
70.9265  
70.5762  
70.2096  
68.9080  
61.9080

56.3835  
51.1933

26.1739  
25.0265  
24.2843  
23.0458  
22.6948  
20.8405  
20.8178  
20.7400  
20.6866  
20.6395

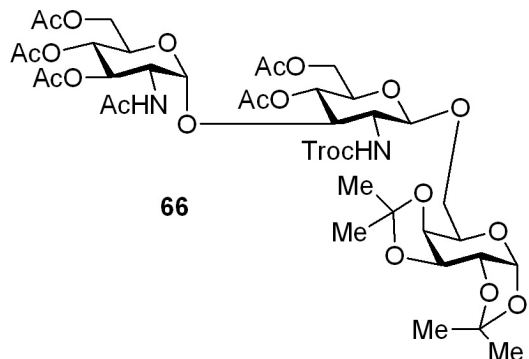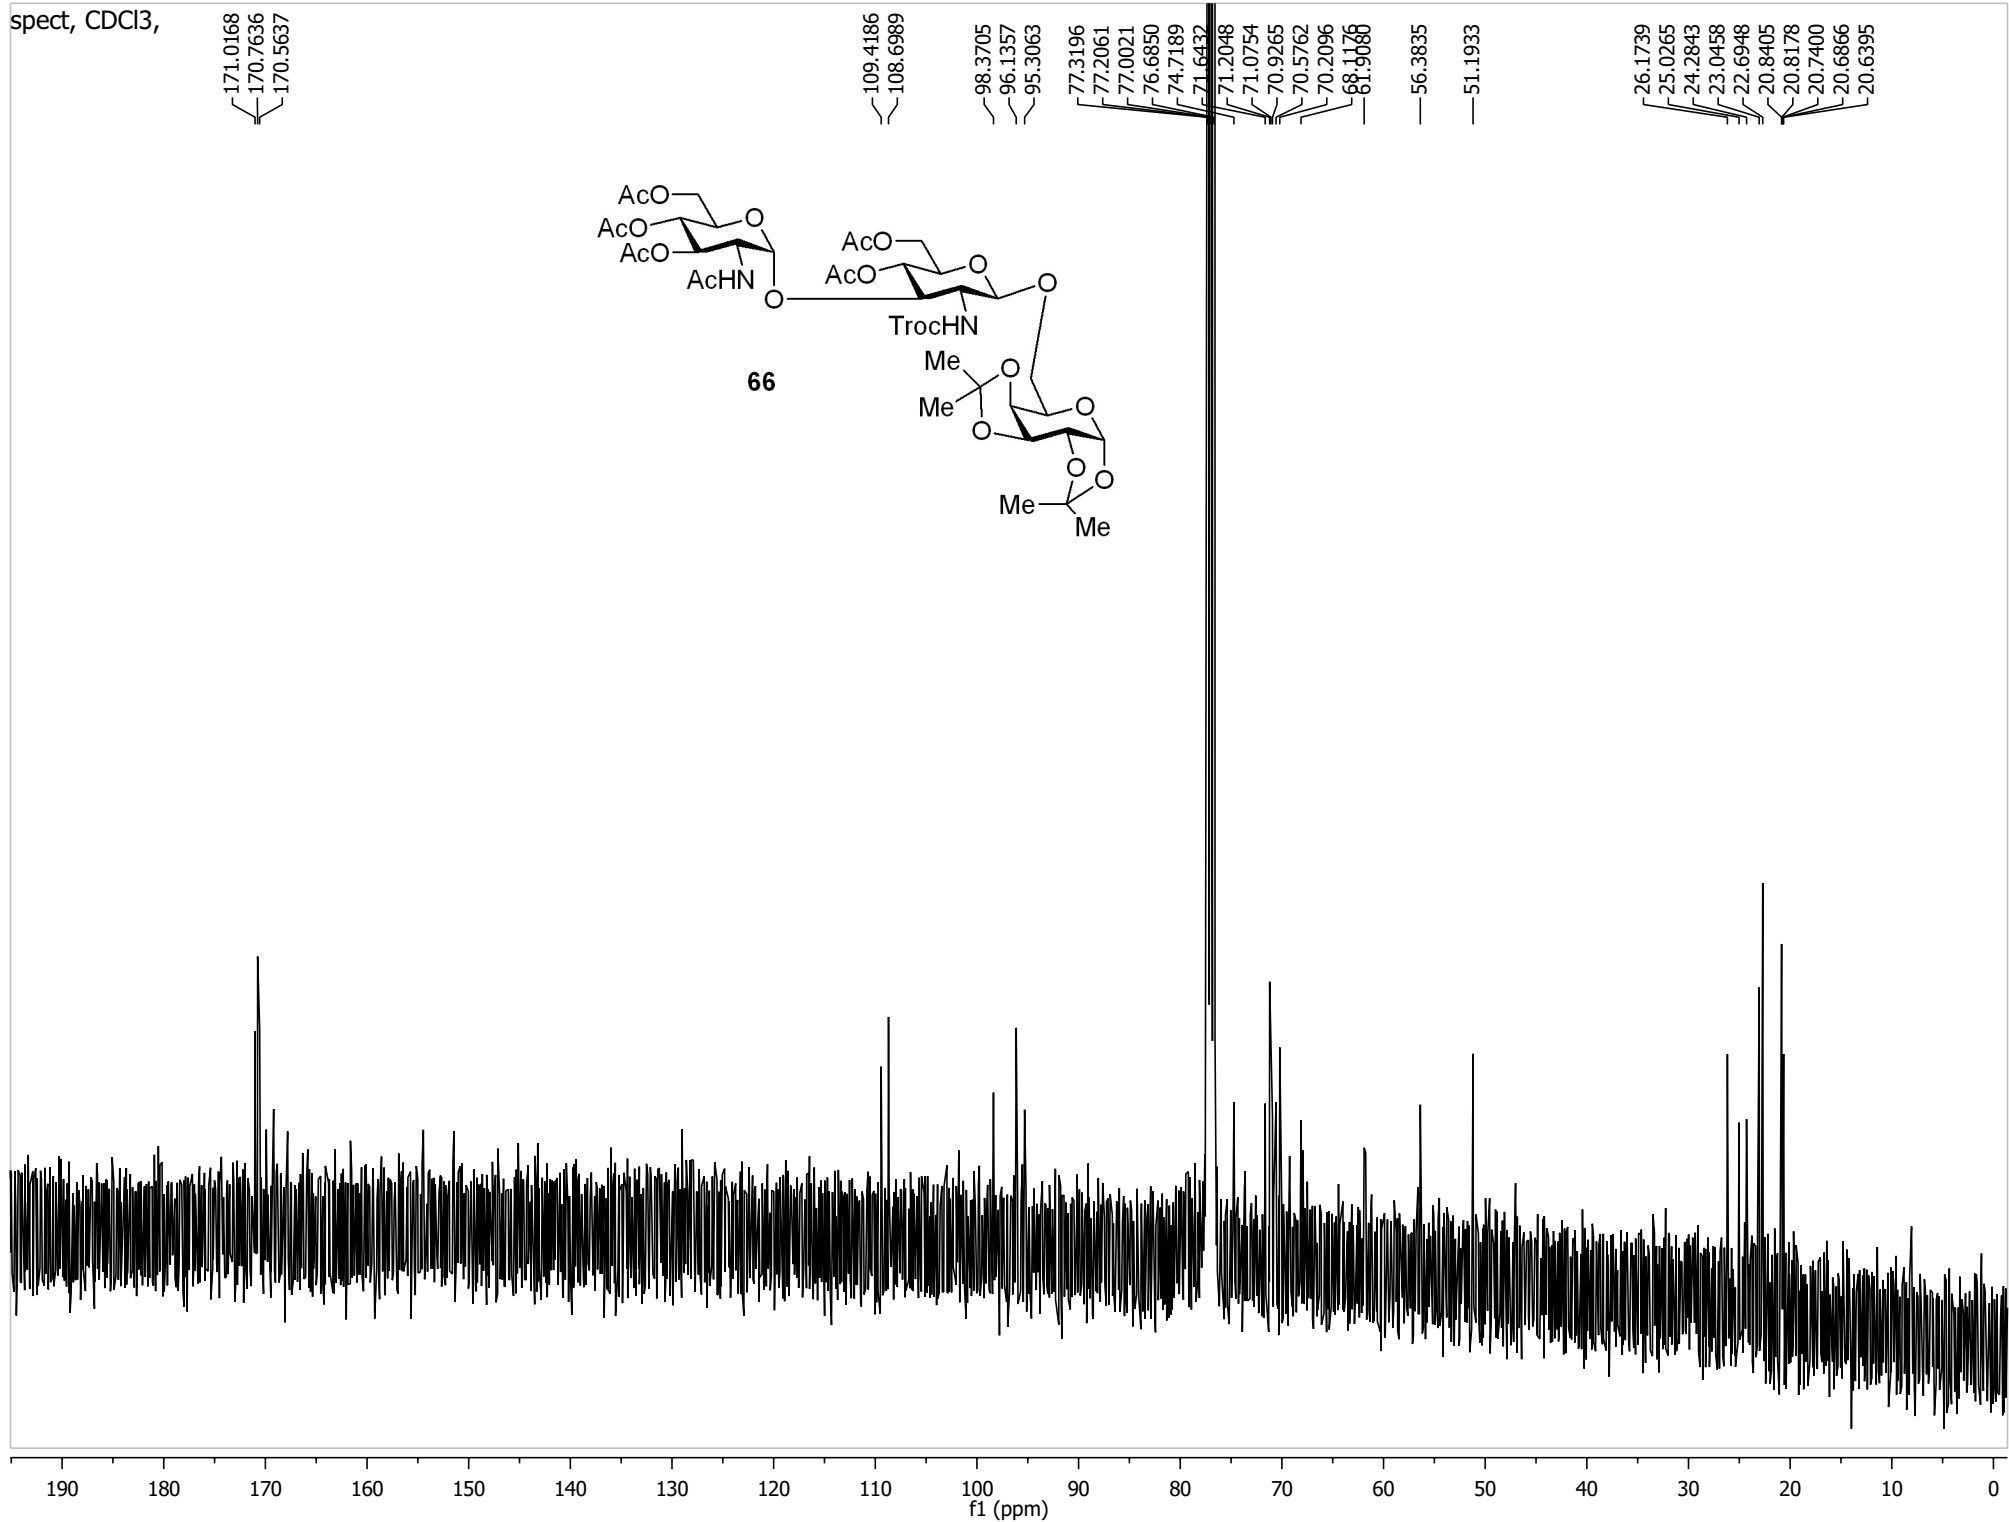

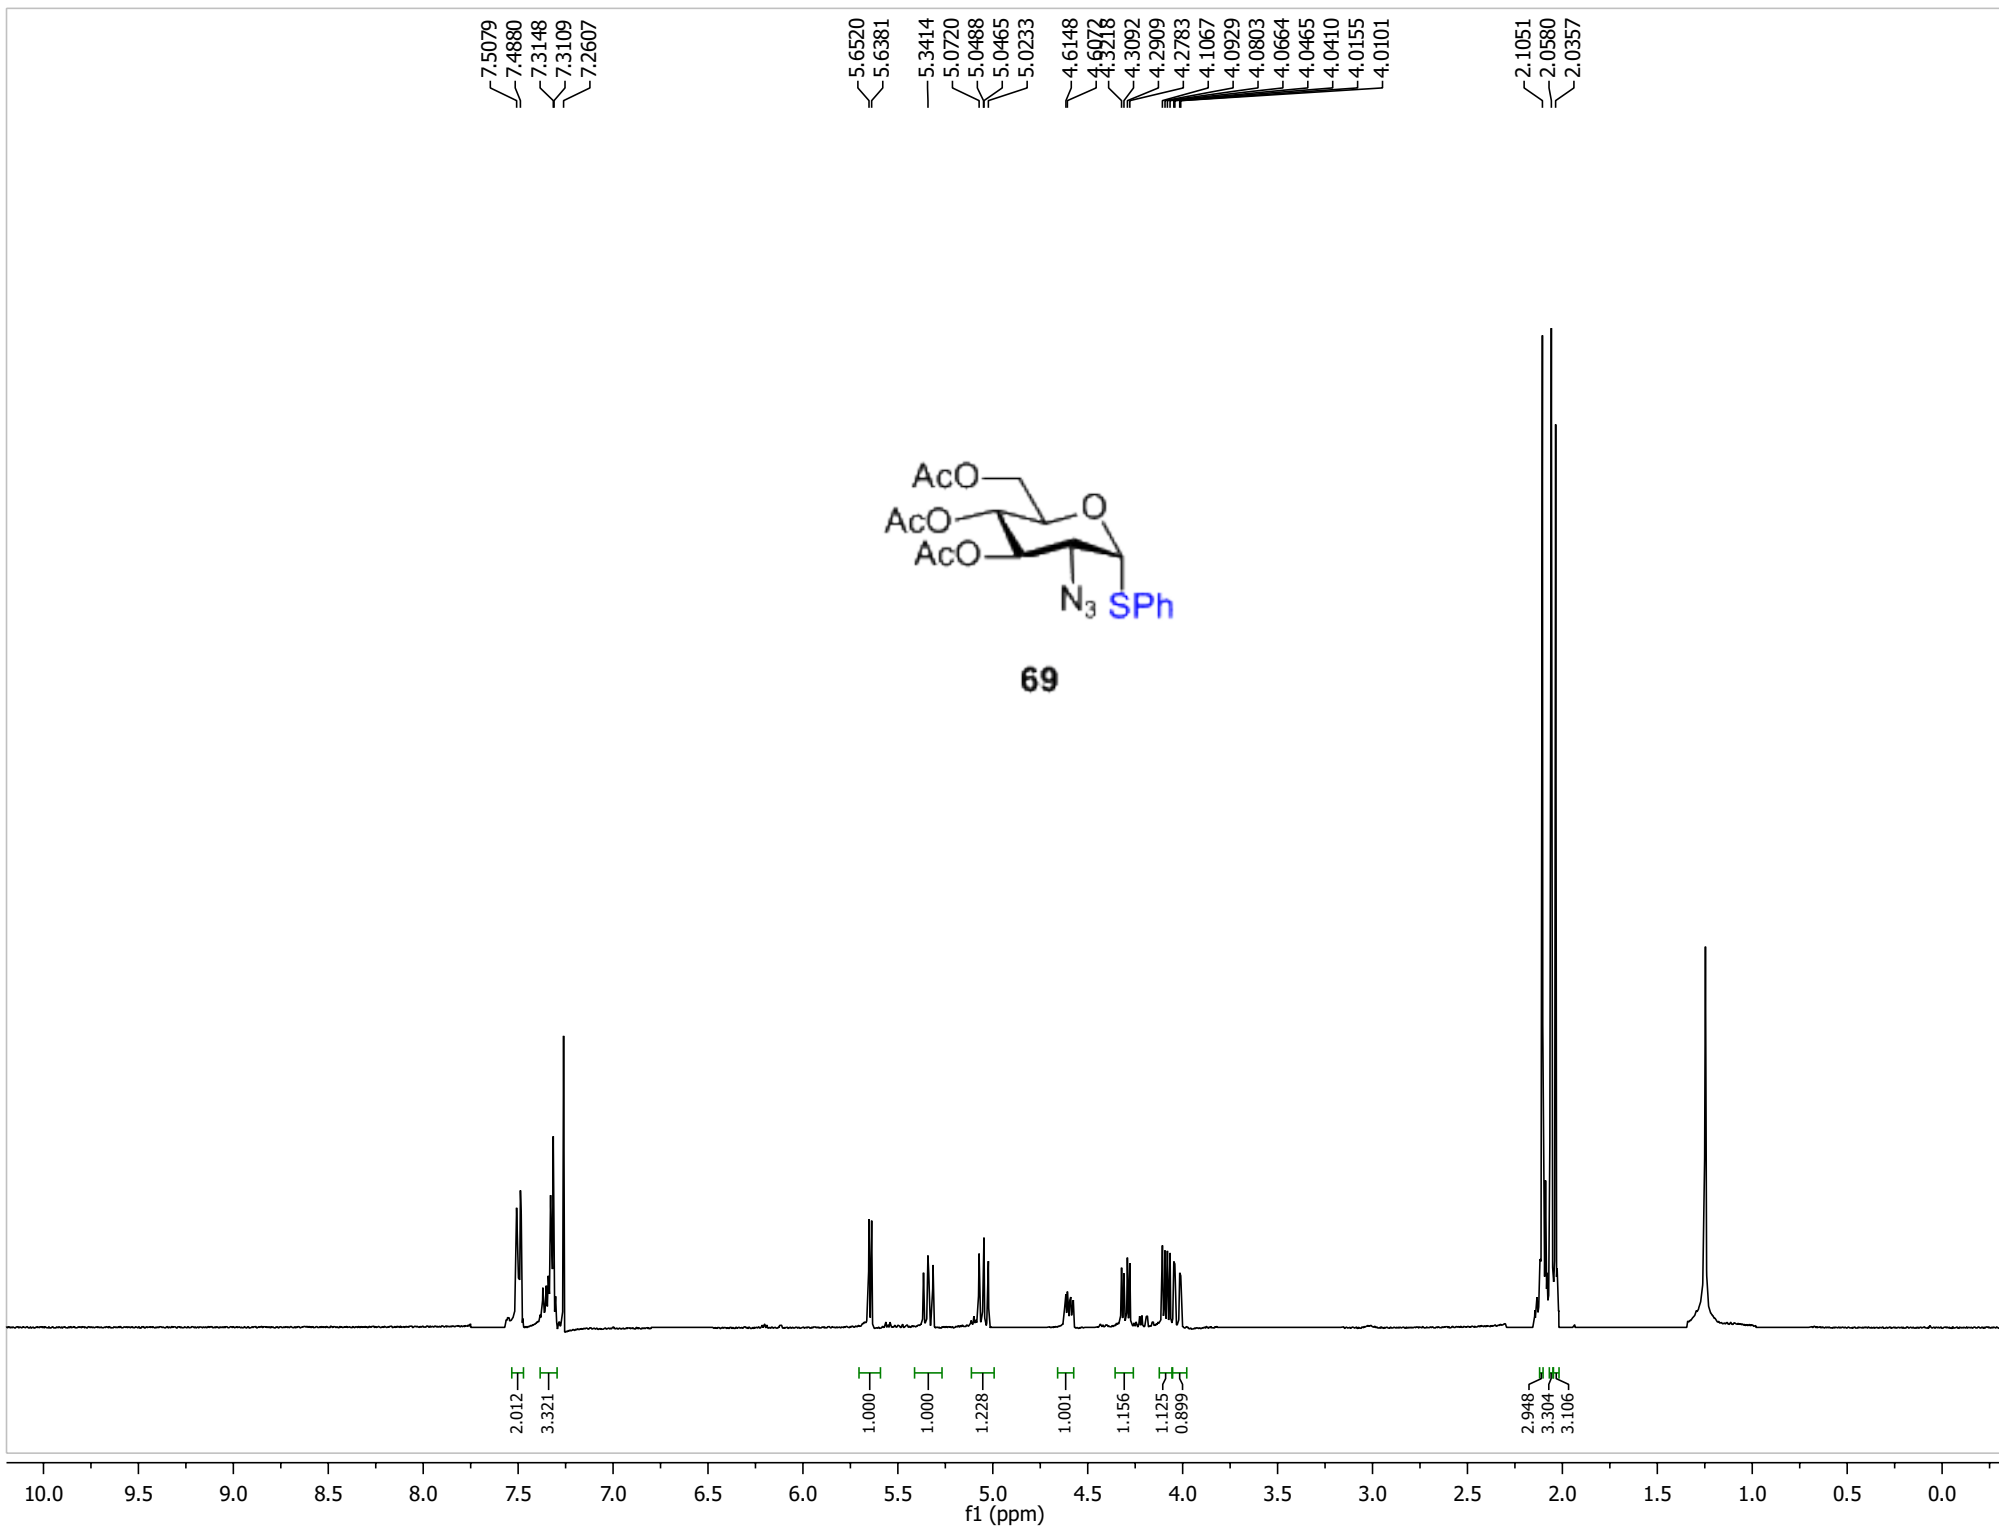



170.5079  
169.7993

134.1298  
132.1793  
129.2175  
128.0870

86.4493

77.3181

77.0000

76.6828

72.0157

68.6174

68.4423

61.8588

61.5559

20.6788  
20.6268

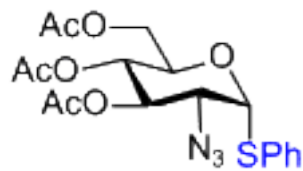

69

190 180 170 160 150 140 130 120 110 100 90 80 70 60 50 40 30 20 10 0  
f1 (ppm)

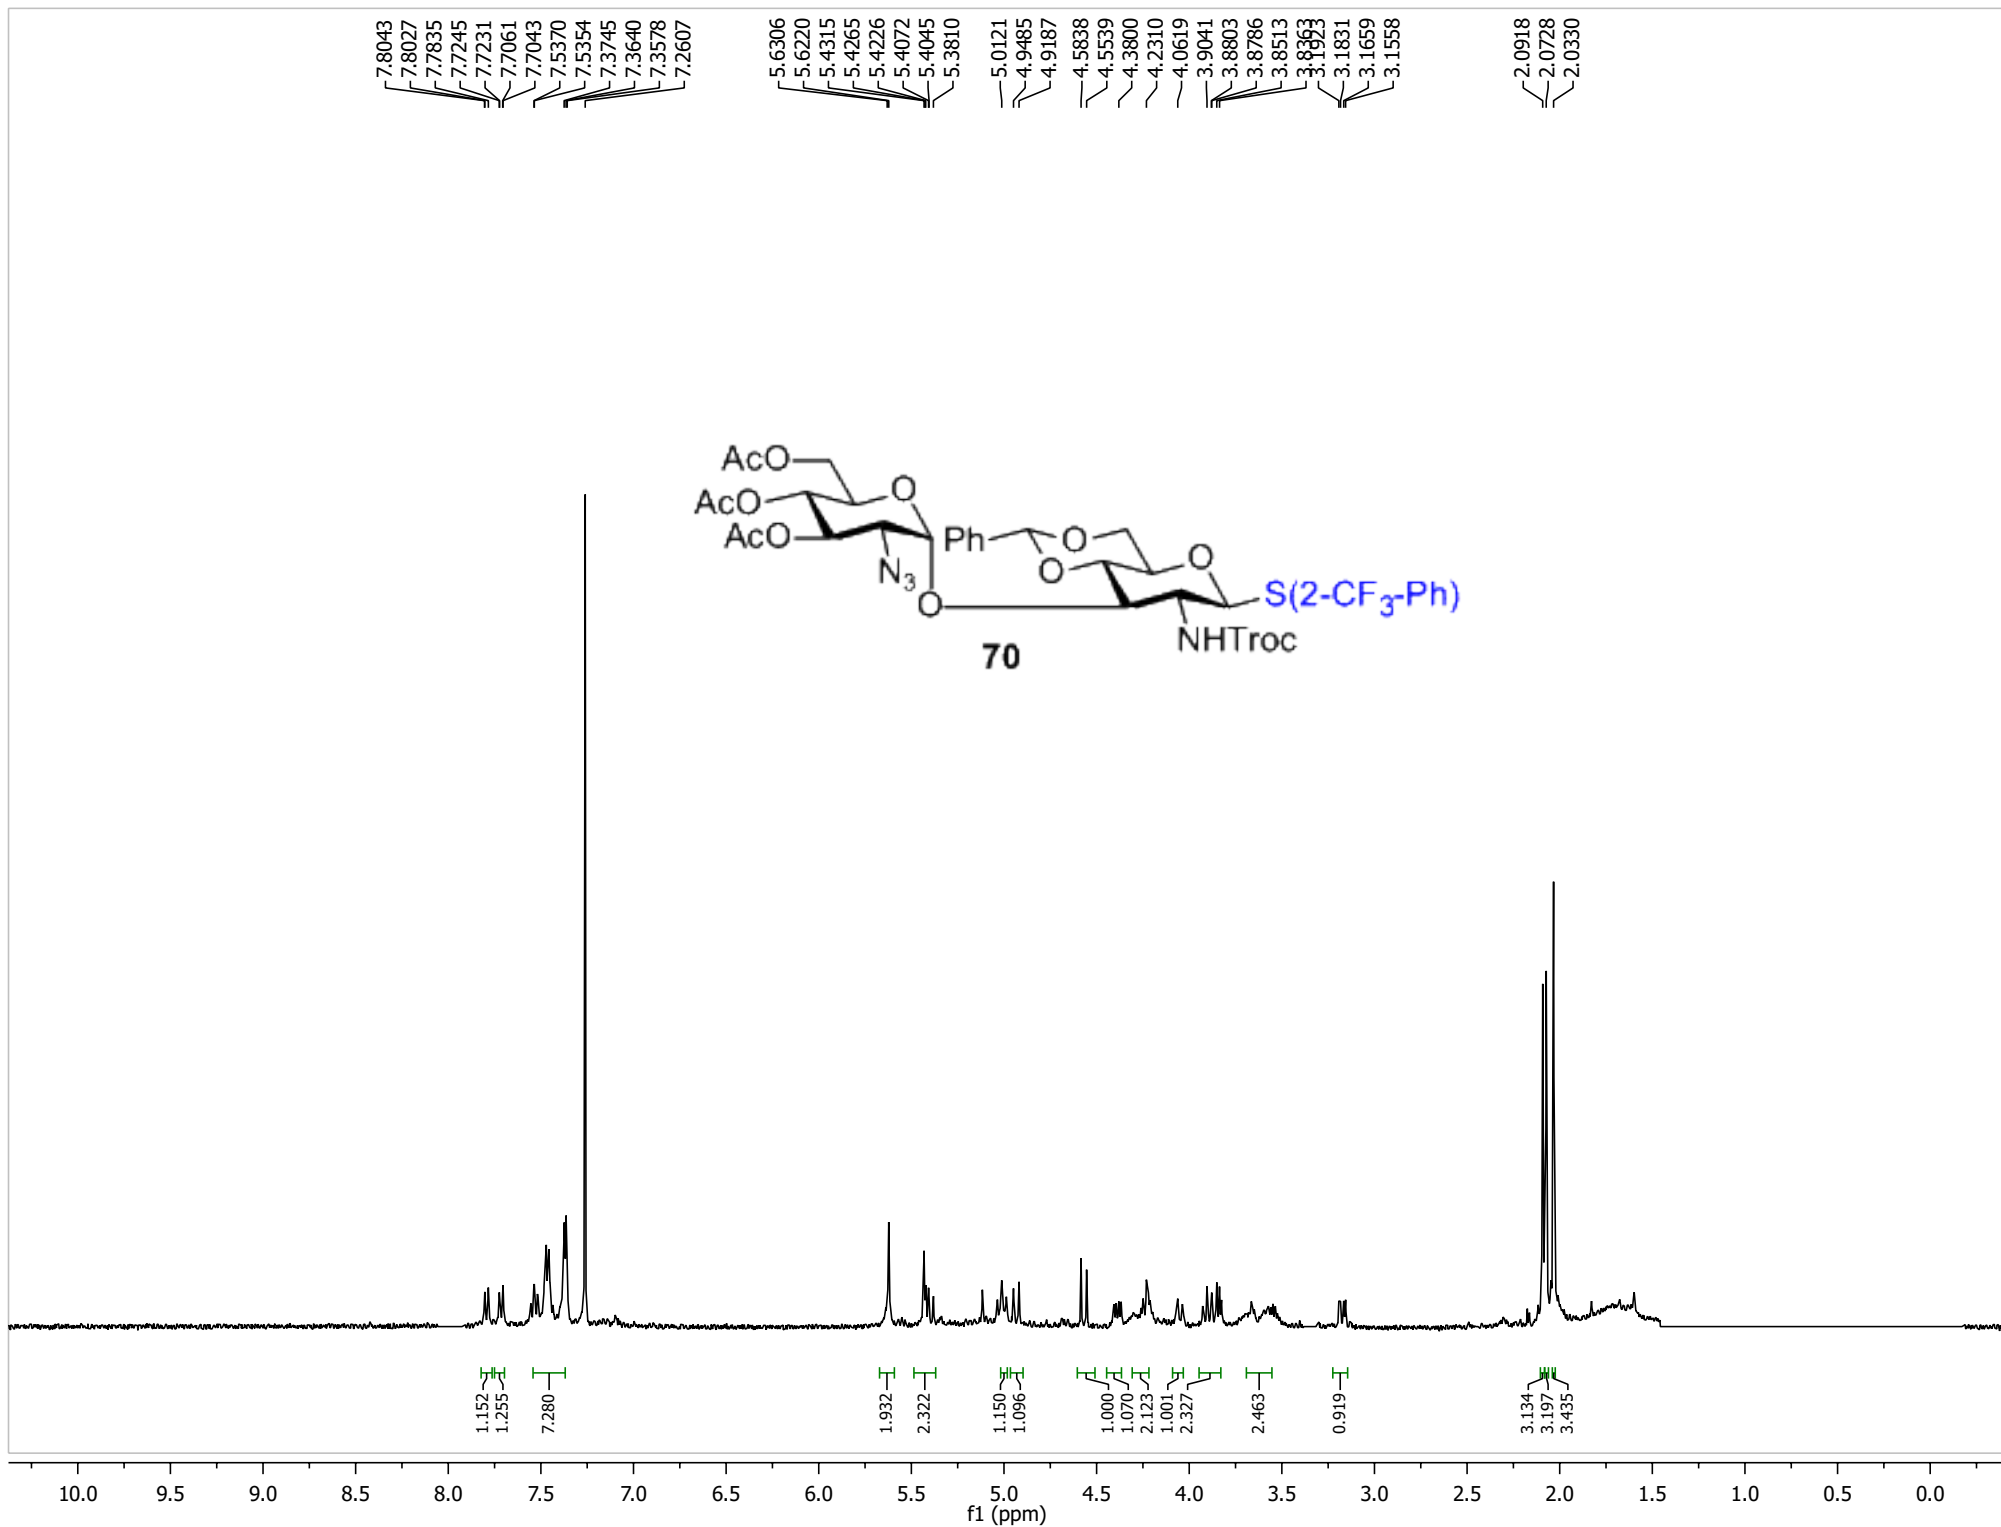

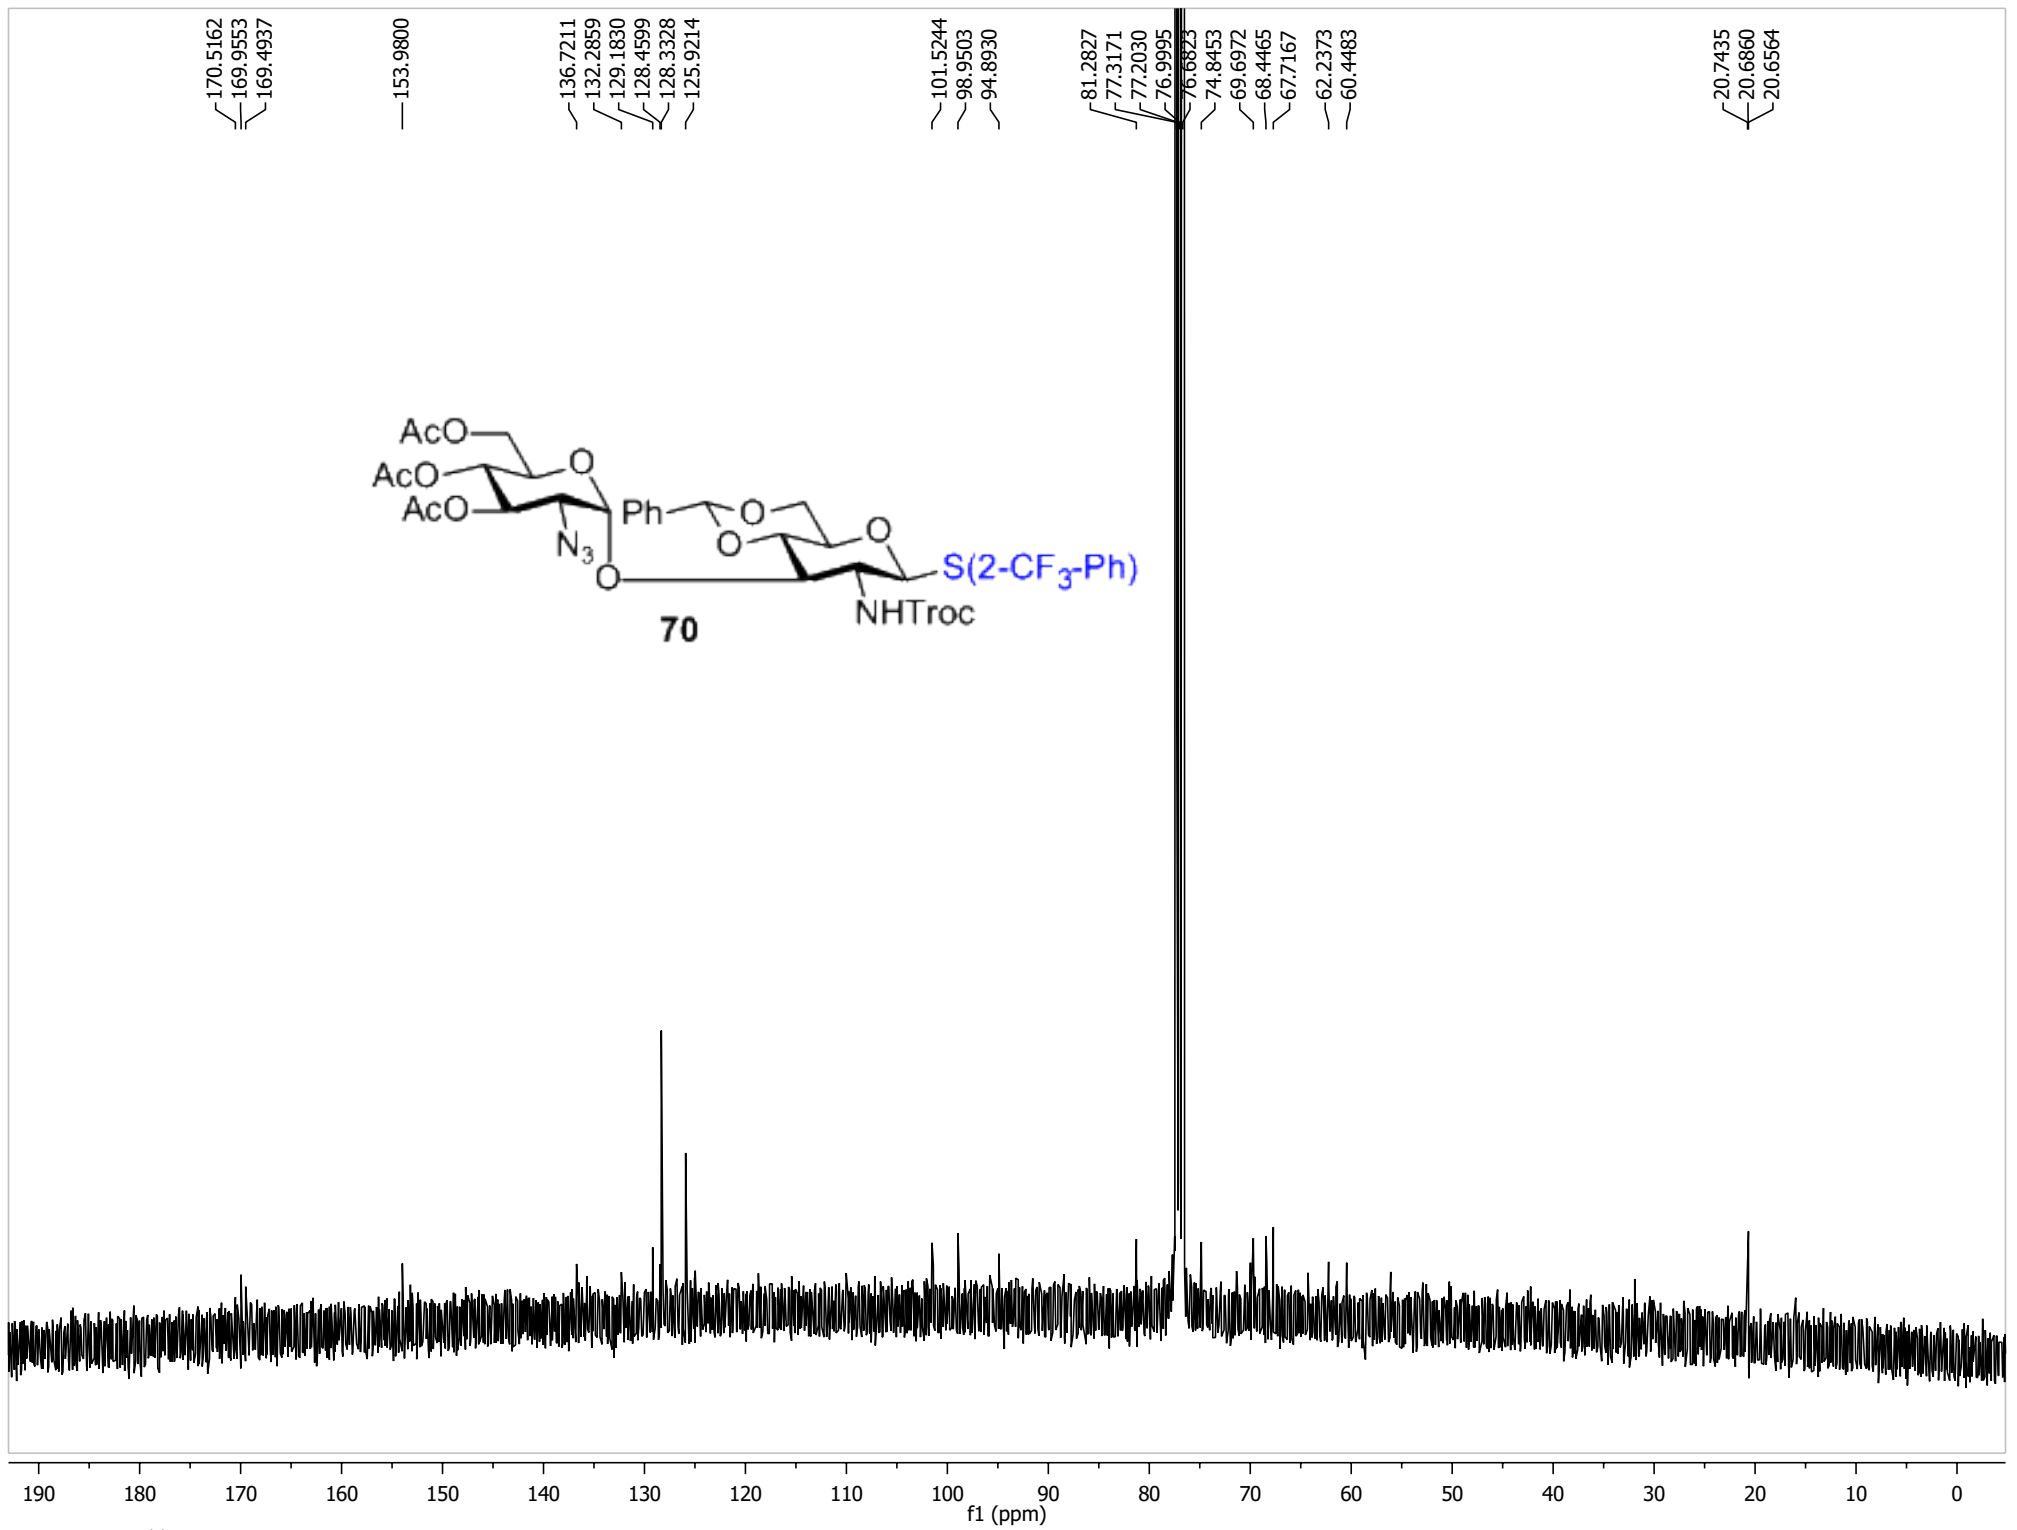

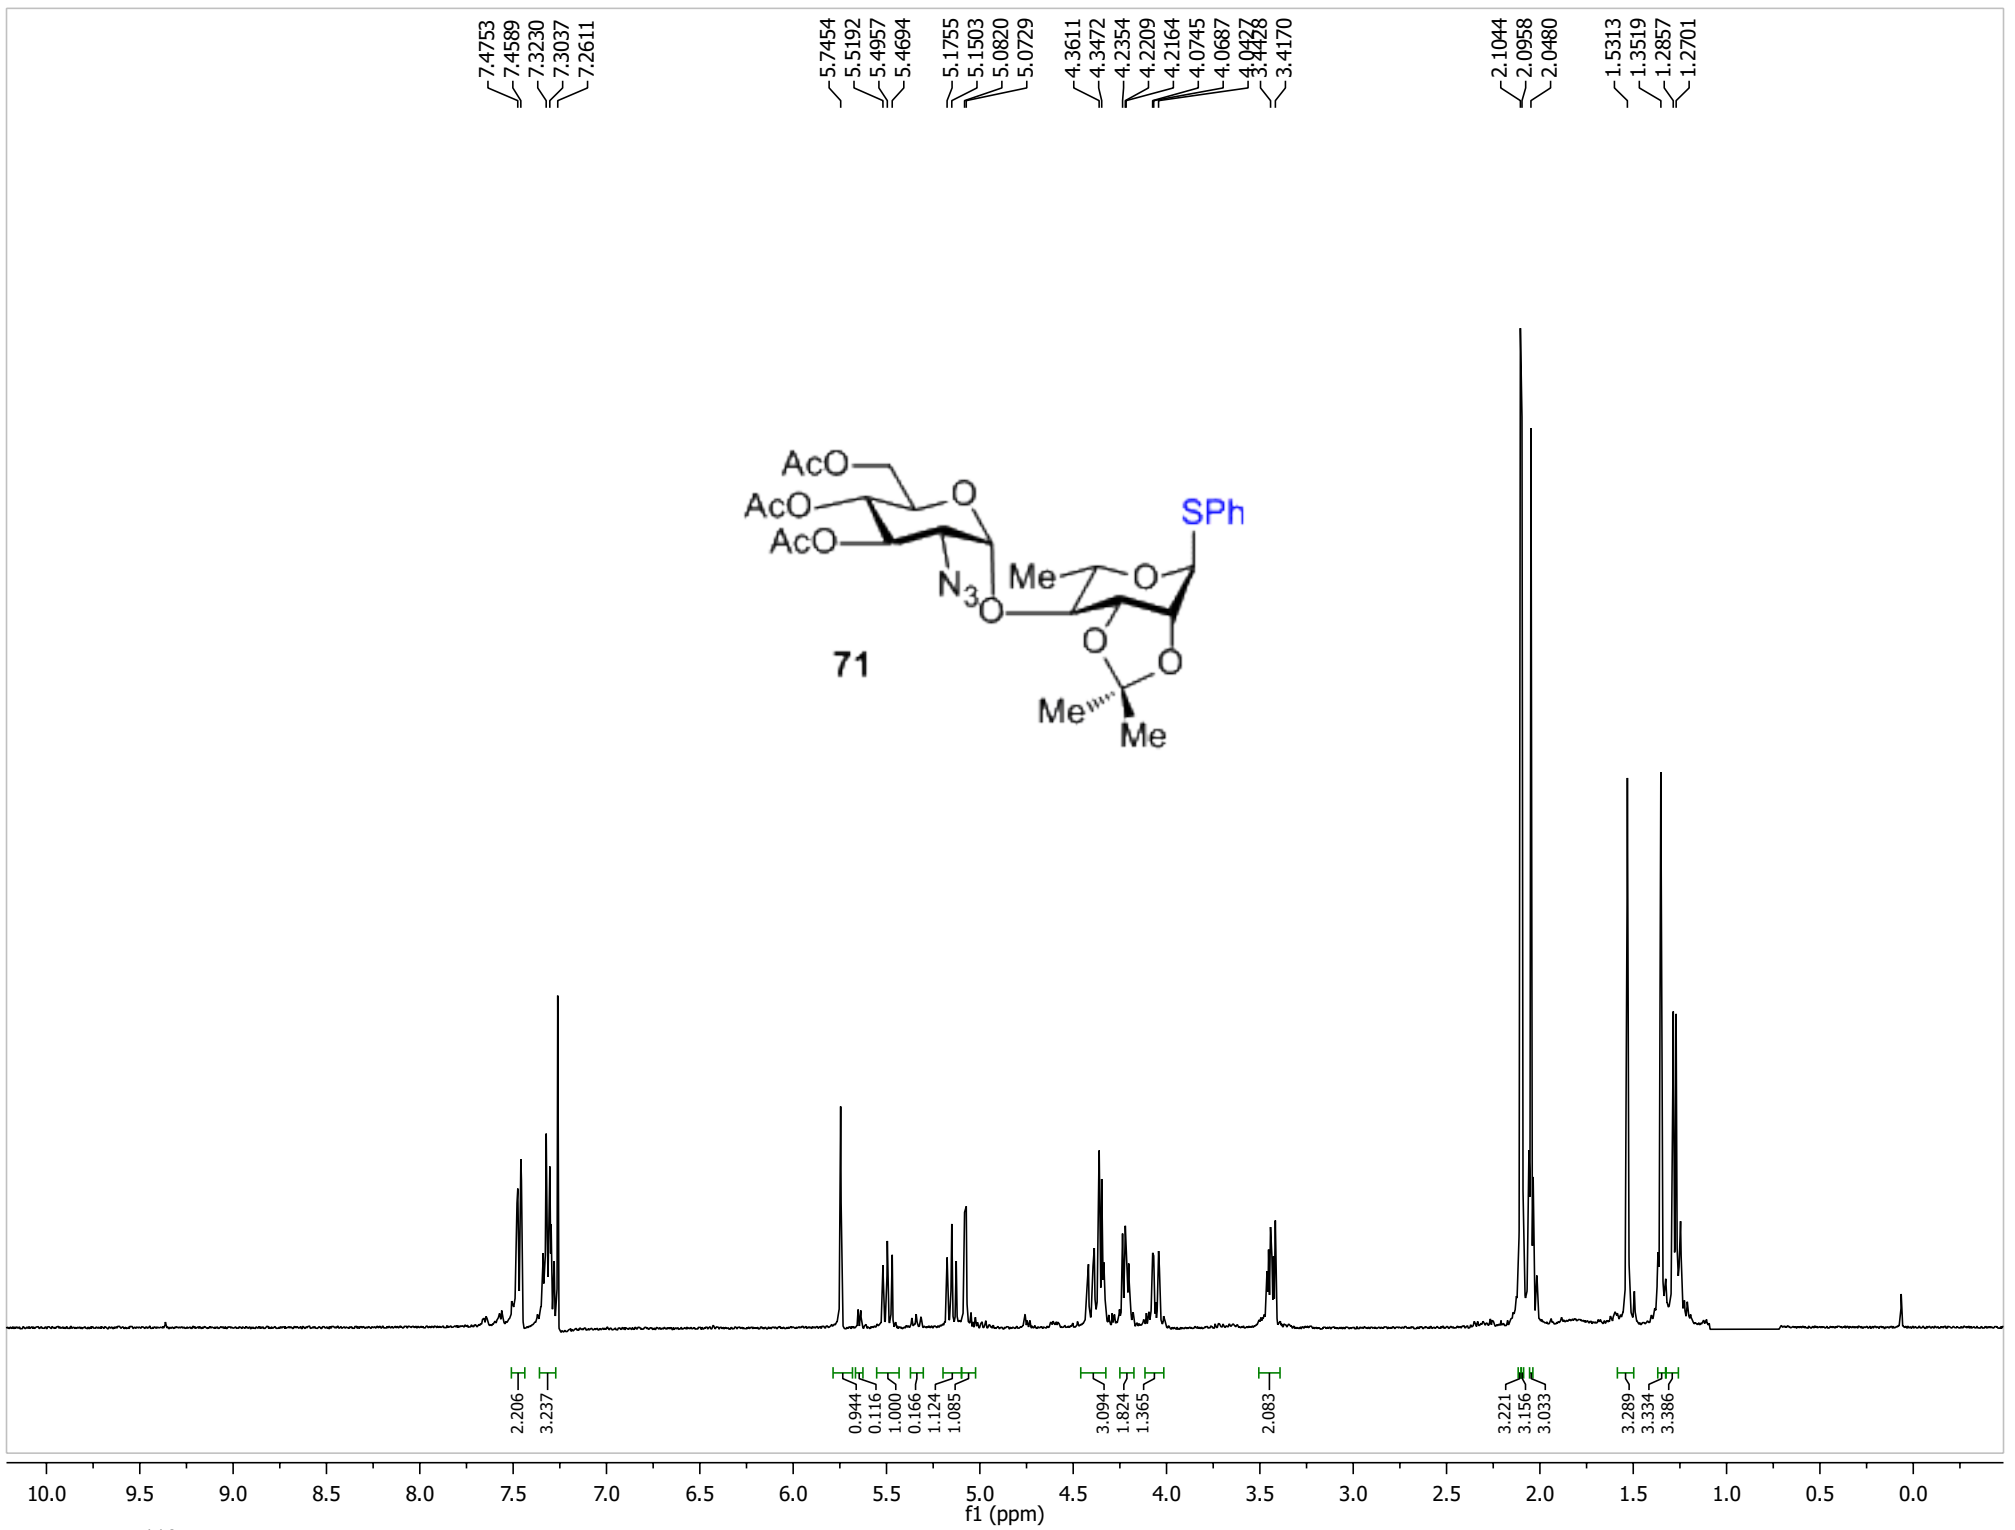

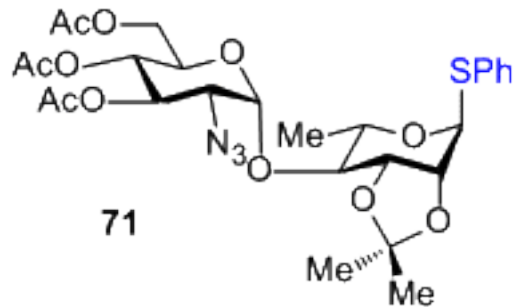

170.7499  
170.0332  
169.7069

133.0500  
131.8717  
129.0618  
127.6883

109.5356

98.5023

83.4567  
82.1659  
77.3178  
77.0002  
76.6825  
76.4476  
76.3155  
70.5939  
67.9361  
67.5461  
66.0465  
61.2567  
61.1371

28.1863  
26.4683  
20.7651  
20.7281  
20.6441  
17.2389

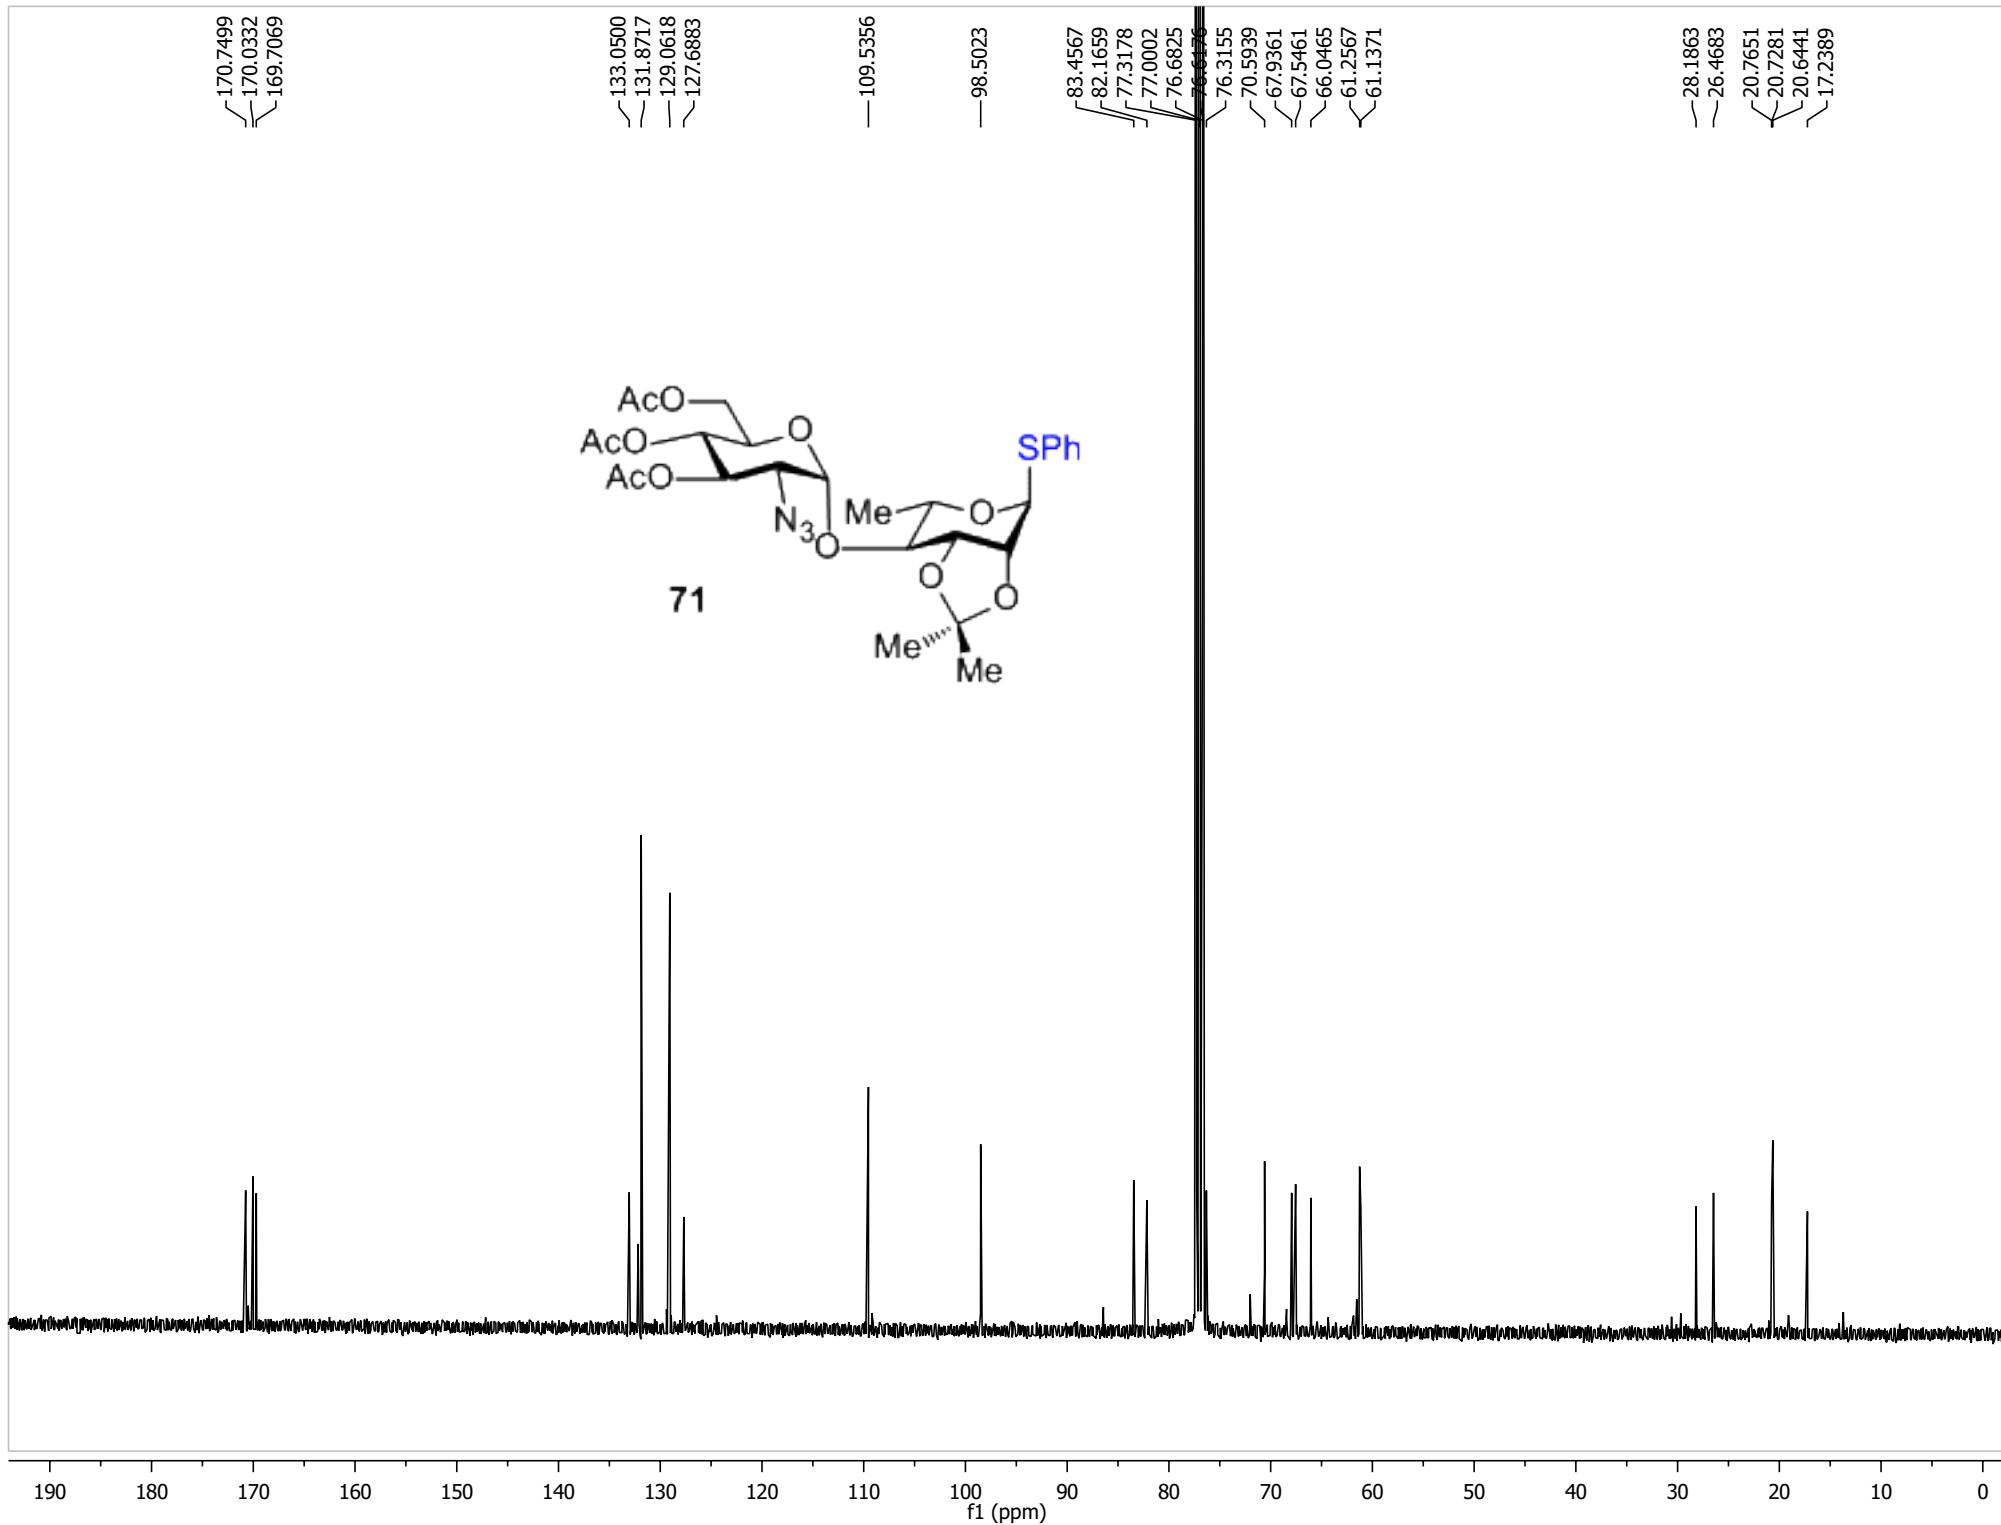

Supplement: NIHMS399316-supplement-2_si_002.pdf [file NIHMS399316-supplement-2_si_002.pdf]
